# Supplementary material for: Comparative analysis of shotgun metagenomics and 16S rDNA sequencing of gut microbiota in migratory seagulls
Source: PeerJ. 2023 Nov 3;11:e16394. doi: 10.7717/peerj.16394 (PMC10629391; doi:10.7717/peerj.16394)
Supplement: Supplemental Information 1 [file peerj-11-16394-s001.xlsx]

## Sheet: Sheet1
feature	metaGenome	meta16S	Type
Bacteria	99.9997	99.9966	overlap
Bacteria.Firmicutes	1.41492	10.5726	overlap
Bacteria.Firmicutes.Bacilli	1.38653	10.4004	overlap
Bacteria.Firmicutes.Bacilli.Lactobacillales	1.31745	10.366	overlap
Bacteria.Firmicutes.Bacilli.Lactobacillales.Aerococcaceae	0.0809144	1.84879	overlap
Bacteria.Firmicutes.Bacilli.Lactobacillales.Aerococcaceae.Aerococcus	0.0787551	1.84802	overlap
Bacteria.Firmicutes.Bacilli.Lactobacillales.Enterococcaceae	0.0839799	3.93616	overlap
Bacteria.Firmicutes.Bacilli.Lactobacillales.Enterococcaceae.Catellicoccus	0.0296991	3.90551	overlap
Bacteria.Firmicutes.Bacilli.Lactobacillales.Enterococcaceae.Catellicoccus.Catellicoccus_marimammalium_M35/04/3	0	3.82864	meta16S
Bacteria.Firmicutes.Bacilli.Lactobacillales.Lactobacillaceae	0.0560706	3.41841	overlap
Bacteria.Firmicutes.Bacilli.Lactobacillales.Lactobacillaceae.Lactobacillus	0.0530437	3.41841	overlap
Bacteria.Firmicutes.Bacilli.Lactobacillales.Lactobacillaceae.Lactobacillus.Lactobacillus_aviarius	0.0348249	2.02279	overlap
Bacteria.Proteobacteria	97.5677	88.4788	overlap
Bacteria.Proteobacteria.Gammaproteobacteria	97.2397	88.4016	overlap
Bacteria.Proteobacteria.Gammaproteobacteria.Enterobacterales	90.6649	0	metaGenome
Bacteria.Proteobacteria.Gammaproteobacteria.Enterobacterales.Enterobacteriaceae	82.6434	0	metaGenome
Bacteria.Proteobacteria.Gammaproteobacteria.Enterobacterales.Enterobacteriaceae.Escherichia	48.837	0	metaGenome
Bacteria.Proteobacteria.Gammaproteobacteria.Enterobacterales.Enterobacteriaceae.Escherichia.Escherichia_albertii	4.77329	0	metaGenome
Bacteria.Proteobacteria.Gammaproteobacteria.Enterobacterales.Enterobacteriaceae.Escherichia.Escherichia_coli	29.1251	0	metaGenome
Bacteria.Proteobacteria.Gammaproteobacteria.Enterobacterales.Enterobacteriaceae.Shigella	2.2419	0	metaGenome
Bacteria.Proteobacteria.Gammaproteobacteria.Enterobacterales.Enterobacteriaceae.Shigella.Shigella_sonnei	1.72514	0	metaGenome
Bacteria.Proteobacteria.Gammaproteobacteria.Enterobacterales.Erwiniaceae	3.03464	0	metaGenome
Bacteria.Proteobacteria.Gammaproteobacteria.Enterobacterales.Erwiniaceae.Erwinia	1.67523	0	metaGenome
Bacteria.Proteobacteria.Gammaproteobacteria.Enterobacterales.Erwiniaceae.Erwinia.Erwinia_gerundensis	1.63529	0	metaGenome
Bacteria.Proteobacteria.Gammaproteobacteria.Enterobacterales.Hafniaceae	1.82727	0	metaGenome
Bacteria.Proteobacteria.Gammaproteobacteria.Enterobacteriales	0	73.2318	meta16S
Bacteria.Proteobacteria.Gammaproteobacteria.Enterobacteriales.Enterobacteriaceae	0	73.2318	meta16S
Bacteria.Proteobacteria.Gammaproteobacteria.Enterobacteriales.Enterobacteriaceae.Escherichia-Shigella	0	59.1974	meta16S
Bacteria.Proteobacteria.Gammaproteobacteria.Enterobacteriales.Enterobacteriaceae.Hafnia-Obesumbacterium	0	2.5898	meta16S
Bacteria.Proteobacteria.Gammaproteobacteria.Enterobacteriales.Enterobacteriaceae.Lelliottia	0	4.89842	meta16S
Bacteria.Proteobacteria.Gammaproteobacteria.Enterobacteriales.Enterobacteriaceae.Pantoea	0	5.45332	meta16S
Bacteria.Proteobacteria.Gammaproteobacteria.Pseudomonadales	5.87525	14.334	overlap
Bacteria.Proteobacteria.Gammaproteobacteria.Pseudomonadales.Moraxellaceae	5.41123	7.51357	overlap
Bacteria.Proteobacteria.Gammaproteobacteria.Pseudomonadales.Moraxellaceae.Acinetobacter	0.391611	2.38517	overlap
Bacteria.Proteobacteria.Gammaproteobacteria.Pseudomonadales.Moraxellaceae.Psychrobacter	4.91885	5.10094	overlap
Bacteria.Proteobacteria.Gammaproteobacteria.Pseudomonadales.Moraxellaceae.Psychrobacter.Psychrobacter_frigidicola	0.0233541	4.60064	overlap
Bacteria.Proteobacteria.Gammaproteobacteria.Pseudomonadales.Pseudomonadaceae	0.43231	6.80696	overlap
Bacteria.Proteobacteria.Gammaproteobacteria.Pseudomonadales.Pseudomonadaceae.Pseudomonas	0.431944	6.80696	overlap
Bacteria.Proteobacteria.Gammaproteobacteria.Pseudomonadales.Pseudomonadaceae.Pseudomonas.Pseudomonas_fragi	0.00205138	1.7892	overlap
