# Supplementary material for: Comparative analysis of shotgun metagenomics and 16S rDNA sequencing of gut microbiota in migratory seagulls
Source: PeerJ. 2023 Nov 3;11:e16394. doi: 10.7717/peerj.16394 (PMC10629391; doi:10.7717/peerj.16394)
Supplement: Supplemental Information 2 [file peerj-11-16394-s002.xlsx]

## Sheet: metagenome
taxonomy	HG-1_tags	HG-2_tags	HG-3_tags	HG-4_tags	HXQ-1_tags	HXQ-2_tags	HXQ-3_tags	HXQ-4_tags	HG-1_relative_abundance	HG-2_relative_abundance	HG-3_relative_abundance	HG-4_relative_abundance	HXQ-1_relative_abundance	HXQ-2_relative_abundance	HXQ-3_relative_abundance	HXQ-4_relative_abundance
Bacteria	57074978	5.26685e+07	52714293	5.26784e+07	6.5108e+07	6.78865e+07	5.52355e+07	52251835	100	99.9999	100	99.999	100	99.9988	100	100
Archaea	0	53	0	540	0	793	2	17	0	0.000100629	0	0.00102508	0	0.00116811	3.62086e-06	3.25347e-05
Bacteria;Proteobacteria	56456076	50151752	5.14286e+07	49254834	64566086	66874937	54576552	5.16563e+07	98.9156	95.2214	97.561	93.5001	99.1677	98.5088	98.807	98.8602
Bacteria;Firmicutes	178966	2087112	544684	2871590	87862.5	128899	31378	92529.5	0.313562	3.96273	1.03328	5.45112	0.134949	0.189872	0.0568077	0.177084
Bacteria;Actinobacteria	15412.5	11303	7388.5	95734.5	15922	19725	33788.5	11440	0.027004	0.0214606	0.0140161	0.181732	0.0244548	0.0290555	0.0611717	0.021894
Bacteria;Bacteroidetes	4	110	381	32964.5	327.5	11	517	30	7.00833e-06	0.000208853	0.000722764	0.0625763	0.00050301	1.62033e-05	0.000935992	5.74142e-05
Bacteria;Bacteria_noname	701	345	11	330	835	1632	1052	5	0.00122821	0.000655039	2.08672e-05	0.000626437	0.00128248	0.00240398	0.00190457	9.56904e-06
Bacteria;Cyanobacteria	2	31	13	1956	259	0	17	1453	3.50416e-06	5.88586e-05	2.46612e-05	0.00371306	0.000397801	0	3.07773e-05	0.00278076
Bacteria;Candidatus_Omnitrophica	0	0	2787	0	41	0	0	655	0	0	0.00528699	0	6.29723e-05	0	0	0.00125354
Bacteria;Gemmatimonadetes	0	0	176	109	482	812	1086	661	0	0	0.000333875	0.000206914	0.000740308	0.0011961	0.00196613	0.00126503
Archaea;Archaea_noname	0	45	0	512	0	793	2	17	0	8.54399e-05	0	0.000971926	0	0.00116811	3.62086e-06	3.25347e-05
Bacteria;Nitrospirae	0	21	16	191	18	0	0	29	0	3.9872e-05	3.03523e-05	0.000362574	2.76464e-05	0	0	5.55004e-05
Bacteria;Verrucomicrobia	0	16	0	118	12	0	0	14	0	3.03786e-05	0	0.000223999	1.84309e-05	0	0	2.67933e-05
Bacteria;Spirochaetes	0	0	0	102	0	0	0	8	0	0	0	0.000193626	0	0	0	1.53105e-05
Bacteria;Acidobacteria	0	36	0	58	1	0	0	6	0	6.83519e-05	0	0.000110101	1.53591e-06	0	0	1.14828e-05
Bacteria;Lentisphaerae	5	91	2	0	0	0	0	0	8.76041e-06	0.000172778	3.79404e-06	0	0	0	0	0
Bacteria;Chlamydiae	3	24	1	0	78	3	0	0	5.25624e-06	4.55679e-05	1.89702e-06	0	0.000119801	4.41909e-06	0	0
Bacteria;Candidatus_Sumerlaeota	0	67	0	14	0	0	0	0	0	0.000127211	0	2.65761e-05	0	0	0	0
Bacteria;Candidatus_Microgenomates	0	62	0	0	0	0	0	0	0	0.000117717	0	0	0	0	0	0
Bacteria;Chloroflexi	0	14	0	46	0	0	0	0	0	2.65813e-05	0	8.73215e-05	0	0	0	0
Bacteria;Balneolaeota	0	0	0	50	0	0	0	0	0	0	0	9.49146e-05	0	0	0	0
Bacteria;Fusobacteria	40	0	0	0	0	14	0	0	7.00833e-05	0	0	0	0	2.06224e-05	0	0
Archaea;Euryarchaeota	0	8	0	28	0	0	0	0	0	1.51893e-05	0	5.31522e-05	0	0	0	0
Bacteria;Planctomycetes	0	0	0	33	0	0	0	0	0	0	0	6.26437e-05	0	0	0	0
Bacteria;Candidatus_Hydrogenedentes	0	12	0	0	0	0	0	0	0	2.2784e-05	0	0	0	0	0	0
Bacteria;Deinococcus-Thermus	0	0	0	0	0	0	0	9	0	0	0	0	0	0	0	1.72243e-05
Bacteria;Proteobacteria;Gammaproteobacteria	56370745	4.99209e+07	51276732	48831451	64408798	66760166	54407656	5.15371e+07	98.7661	94.7831	97.2729	92.6964	98.9261	98.3397	98.5012	98.632
Bacteria;Firmicutes;Bacilli	174836	2041860	543194	2809833	85138	123856	30728	91913	0.306326	3.87681	1.03045	5.33389	0.130764	0.182444	0.0556309	0.175904
Bacteria;Actinobacteria;Actinobacteria	15412	11277	7388.5	95612.5	15912	19725	33758.5	11440	0.0270031	0.0214112	0.0140161	0.1815	0.0244394	0.0290555	0.0611174	0.021894
Bacteria;Proteobacteria;Betaproteobacteria	25449	51001.5	11204	22974.5	22386	24771	26851	12580	0.0445887	0.0968347	0.0212542	0.0436123	0.0343829	0.0364884	0.0486119	0.0240757
Bacteria;Proteobacteria;Alphaproteobacteria	1105	2641	1495	140284	3398	4305.5	3928	3428	0.00193605	0.00501437	0.00283604	0.266301	0.00521902	0.00634213	0.00711137	0.00656053
Bacteria;Firmicutes;Clostridia	126	14203	649	27906	1601	2307.5	48	179	0.000220762	0.0269667	0.00123117	0.0529738	0.00245899	0.00339902	8.69006e-05	0.000342572
Bacteria;Bacteroidetes;Cytophagia	4	28	0	15482.5	0	0	0	2	7.00833e-06	5.31626e-05	0	0.0293903	0	0	0	3.82762e-06
Bacteria;Bacteroidetes;Flavobacteriia	0	73	299	8811	288	4	61	9	0	0.000138603	0.000567209	0.0167259	0.000442342	5.89212e-06	0.000110436	1.72243e-05
Bacteria;Proteobacteria;Epsilonproteobacteria	0	22	86	3761	396	1412	29	297	0	4.17706e-05	0.000163144	0.00713948	0.00060822	0.00207992	5.25025e-05	0.000568401
Bacteria;Bacteria_noname;Bacteria_noname	701	345	11	330	835	1632	1052	5	0.00122821	0.000655039	2.08672e-05	0.000626437	0.00128248	0.00240398	0.00190457	9.56904e-06
Bacteria;Gemmatimonadetes;Gemmatimonadetes_noname	0	0	176	109	482	812	1086	661	0	0	0.000333875	0.000206914	0.000740308	0.0011961	0.00196613	0.00126503
Bacteria;Cyanobacteria;Cyanobacteria_noname	2	31	13	1956	180	0	17	715	3.50416e-06	5.88586e-05	2.46612e-05	0.00371306	0.000276464	0	3.07773e-05	0.00136837
Bacteria;Proteobacteria;Deltaproteobacteria	594	320	83	1396	584	0	0	33	0.00104074	0.000607573	0.000157453	0.00265002	0.000896971	0	0	6.31557e-05
Archaea;Archaea_noname;Archaea_noname	0	45	0	512	0	793	2	17	0	8.54399e-05	0	0.000971926	0	0.00116811	3.62086e-06	3.25347e-05
Bacteria;Bacteroidetes;Bacteroidia	0	9	18	425	2	7	427	11	0	1.7088e-05	3.41463e-05	0.000806774	3.07182e-06	1.03112e-05	0.000773054	2.10519e-05
Bacteria;Firmicutes;Tissierellia	4	31	62	599	16	5	3	0	7.00833e-06	5.88586e-05	0.000117615	0.00113708	2.45746e-05	7.36515e-06	5.43129e-06	0
Bacteria;Nitrospirae;Nitrospira	0	21	16	191	18	0	0	29	0	3.9872e-05	3.03523e-05	0.000362574	2.76464e-05	0	0	5.55004e-05
Bacteria;Bacteroidetes;Sphingobacteriia	0	0	0	236	4	0	0	0	0	0	0	0.000447997	6.14364e-06	0	0	0
Bacteria;Verrucomicrobia;Verrucomicrobia_noname	0	16	0	118	12	0	0	14	0	3.03786e-05	0	0.000223999	1.84309e-05	0	0	2.67933e-05
Bacteria;Firmicutes;Negativicutes	0	0	0	0	0	0	0	106	0	0	0	0	0	0	0	0.000202864
Bacteria;Lentisphaerae;Lentisphaerae_noname	5	91	2	0	0	0	0	0	8.76041e-06	0.000172778	3.79404e-06	0	0	0	0	0
Bacteria;Chlamydiae;Chlamydiia	3	24	1	0	78	3	0	0	5.25624e-06	4.55679e-05	1.89702e-06	0	0.000119801	4.41909e-06	0	0
Bacteria;Spirochaetes;Spirochaetia	0	0	0	90	0	0	0	0	0	0	0	0.000170846	0	0	0	0
Bacteria;Candidatus_Sumerlaeota;Candidatus_Sumerlaeota_noname	0	67	0	14	0	0	0	0	0	0.000127211	0	2.65761e-05	0	0	0	0
Bacteria;Candidatus_Microgenomates;Candidatus_Microgenomates_noname	0	62	0	0	0	0	0	0	0	0.000117717	0	0	0	0	0	0
Bacteria;Acidobacteria;Acidobacteria_noname	0	36	0	16	0	0	0	6	0	6.83519e-05	0	3.03727e-05	0	0	0	1.14828e-05
Bacteria;Balneolaeota;Balneolia	0	0	0	50	0	0	0	0	0	0	0	9.49146e-05	0	0	0	0
Bacteria;Fusobacteria;Fusobacteriia	40	0	0	0	0	14	0	0	7.00833e-05	0	0	0	0	2.06224e-05	0	0
Bacteria;Chloroflexi;Anaerolineae	0	0	0	46	0	0	0	0	0	0	0	8.73215e-05	0	0	0	0
Bacteria;Actinobacteria;Coriobacteriia	0.5	26	0	0	10	0	11	0	8.76041e-07	4.93653e-05	0	0	1.53591e-05	0	1.99147e-05	0
Bacteria;Bacteroidetes;Bacteroidetes_noname	0	0	1	41	0	0	0	0	0	0	1.89702e-06	7.783e-05	0	0	0	0
Bacteria;Candidatus_Omnitrophica;Candidatus_Omnitrophica_noname	0	0	0	0	41	0	0	0	0	0	0	0	6.29723e-05	0	0	0
Bacteria;Planctomycetes;Planctomycetia	0	0	0	33	0	0	0	0	0	0	0	6.26437e-05	0	0	0	0
Bacteria;Firmicutes;Firmicutes_noname	0	10	0	16	0	0	0	0	0	1.89866e-05	0	3.03727e-05	0	0	0	0
Bacteria;Acidobacteria;Solibacteres	0	0	0	24	1	0	0	0	0	0	0	4.5559e-05	1.53591e-06	0	0	0
Bacteria;Spirochaetes;Spirochaetes_noname	0	0	0	12	0	0	0	8	0	0	0	2.27795e-05	0	0	0	1.53105e-05
Bacteria;Firmicutes;Erysipelotrichia	0	0	0	20	0	0	0	0	0	0	0	3.79659e-05	0	0	0	0
Bacteria;Acidobacteria;Holophagae	0	0	0	18	0	0	0	0	0	0	0	3.41693e-05	0	0	0	0
Bacteria;Proteobacteria;Acidithiobacillia	0	15	0	0	0	0	0	0	0	2.848e-05	0	0	0	0	0	0
Archaea;Euryarchaeota;Methanomicrobia	0	0	0	15	0	0	0	0	0	0	0	2.84744e-05	0	0	0	0
Bacteria;Chloroflexi;Chloroflexi_noname	0	14	0	0	0	0	0	0	0	2.65813e-05	0	0	0	0	0	0
Bacteria;Candidatus_Hydrogenedentes;Candidatus_Hydrogenedentes_noname	0	12	0	0	0	0	0	0	0	2.2784e-05	0	0	0	0	0	0
Bacteria;Bacteroidetes;Chitinophagia	0	0	0	12	0	0	0	0	0	0	0	2.27795e-05	0	0	0	0
Bacteria;Proteobacteria;Zetaproteobacteria	0	0	0	10	0	0	0	0	0	0	0	1.89829e-05	0	0	0	0
Bacteria;Deinococcus-Thermus;Deinococci	0	0	0	0	0	0	0	9	0	0	0	0	0	0	0	1.72243e-05
Archaea;Euryarchaeota;Halobacteria	0	8	0	0	0	0	0	0	0	1.51893e-05	0	0	0	0	0	0
Bacteria;Proteobacteria;Gammaproteobacteria;Enterobacterales	5.61147e+07	48737769	5.01735e+07	25552191	63666143	66327124	53839124	51113016	98.3175	92.5367	95.18	48.5055	97.7854	97.7018	97.472	97.8205
Bacteria;Proteobacteria;Gammaproteobacteria;Pseudomonadales	43927.5	841604	748387	22626868	238293	63000	163557	104550	0.0769646	1.59792	1.4197	42.9524	0.365996	0.0928009	0.296108	0.200088
Bacteria;Firmicutes;Bacilli;Lactobacillales	165129	1909414	536450	2682685	81274.5	114042	27948	89528	0.289319	3.62534	1.01765	5.09252	0.12483	0.167987	0.0505979	0.171339
Bacteria;Firmicutes;Bacilli;Bacillales	4863	98314	2711	60574	3078	9259.5	2196	920	0.00852037	0.186665	0.00514282	0.114987	0.00472753	0.0136395	0.0039757	0.0017607
Bacteria;Proteobacteria;Betaproteobacteria;Burkholderiales	25388	50204.5	10480	18379.5	22202	24722	26832	12232	0.0444818	0.0953215	0.0198808	0.0348897	0.0341003	0.0364162	0.0485775	0.0234097
Bacteria;Proteobacteria;Gammaproteobacteria;Aeromonadales	169	115170	11286.5	8170	391	19	5	951	0.000296102	0.218668	0.0214107	0.0155091	0.000600541	2.79876e-05	9.05215e-06	0.00182003
Bacteria;Actinobacteria;Actinobacteria;Micrococcales	4510	4530	4456.5	83321	6338	3367	21255.5	2861	0.00790189	0.00860095	0.00845406	0.158168	0.00973459	0.00495969	0.0384816	0.0054754
Bacteria;Proteobacteria;Alphaproteobacteria;Rhodobacterales	1	50	403	119539	121	61.5	42	331	1.75208e-06	9.49332e-05	0.000764499	0.22692	0.000185845	9.05913e-05	7.60381e-05	0.00063347
Bacteria;Proteobacteria;Gammaproteobacteria;Oceanospirillales	15486	12118	5891	6556	16231.5	19677	13492	10620.5	0.0271327	0.023008	0.0111753	0.0124452	0.0249301	0.0289848	0.0244263	0.0203256
Bacteria;Proteobacteria;Gammaproteobacteria;Vibrionales	6174	5412	12570	17825	6424	6526	5627	5278	0.0108173	0.0102756	0.0238455	0.0338371	0.00986668	0.00961299	0.0101873	0.0101011
Bacteria;Actinobacteria;Actinobacteria;Corynebacteriales	10896	5961	2083	3058	9507	16324	11689	6605	0.0190907	0.0113179	0.00395149	0.00580498	0.0146019	0.0240457	0.0211621	0.0126407
Bacteria;Proteobacteria;Gammaproteobacteria;Xanthomonadales	12754	6695	1613	7080	8582	8578	9167	4695	0.022346	0.0127116	0.00305989	0.0134399	0.0131812	0.0126357	0.0165962	0.00898533
Bacteria;Proteobacteria;Gammaproteobacteria;Gammaproteobacteria_noname	7859	6797	1930	3568	8476.5	10009	9465	6819	0.0137696	0.0129052	0.00366125	0.00677311	0.0130191	0.0147436	0.0171357	0.0130503
Bacteria;Firmicutes;Clostridia;Clostridiales	126	14203	649	25317	1601	2307.5	47	164	0.000220762	0.0269667	0.00123117	0.0480591	0.00245899	0.00339902	8.50902e-05	0.000313864
Bacteria;Proteobacteria;Alphaproteobacteria;Rhizobiales	1099	2453	388	13589	3187	4240	3882	2723	0.00192554	0.00465742	0.000736043	0.0257959	0.00489494	0.00624565	0.00702809	0.0052113
Bacteria;Bacteroidetes;Cytophagia;Cytophagales	4	28	0	15482.5	0	0	0	2	7.00833e-06	5.31626e-05	0	0.0293903	0	0	0	3.82762e-06
Bacteria;Proteobacteria;Gammaproteobacteria;Pasteurellales	0	0	49	13923	33.5	305	121	15	0	0	9.29539e-05	0.0264299	5.1453e-05	0.000449274	0.000219062	2.87071e-05
Bacteria;Proteobacteria;Gammaproteobacteria;Alteromonadales	0	26	801	8646	1	0	28	226	0	4.93653e-05	0.00151951	0.0164126	1.53591e-06	0	5.0692e-05	0.000432521
Bacteria;Bacteroidetes;Flavobacteriia;Flavobacteriales	0	73	299	8811	288	4	61	9	0	0.000138603	0.000567209	0.0167259	0.000442342	5.89212e-06	0.000110436	1.72243e-05
Bacteria;Proteobacteria;Alphaproteobacteria;Rhodospirillales	0	22	691	5431	23	1	2	145	0	4.17706e-05	0.00131084	0.0103096	3.53259e-05	1.47303e-06	3.62086e-06	0.000277502
Bacteria;Proteobacteria;Betaproteobacteria;Neisseriales	61	276	261	3659	94	49	10	114	0.000106877	0.000524031	0.000495122	0.00694585	0.000144375	7.21785e-05	1.81043e-05	0.000218174
Bacteria;Bacteria_noname;Bacteria_noname;Bacteria_noname	701	345	11	330	835	1632	1052	5	0.00122821	0.000655039	2.08672e-05	0.000626437	0.00128248	0.00240398	0.00190457	9.56904e-06
Bacteria;Gemmatimonadetes;Gemmatimonadetes_noname;Gemmatimonadetes_noname	0	0	176	109	482	812	1086	661	0	0	0.000333875	0.000206914	0.000740308	0.0011961	0.00196613	0.00126503
Bacteria;Actinobacteria;Actinobacteria;Propionibacteriales	0	0	657	149	0	0	17	1823	0	0	0.00124634	0.000282846	0	0	3.07773e-05	0.00348887
Bacteria;Proteobacteria;Gammaproteobacteria;Cardiobacteriales	0	0	32	1598.5	20	4	199	310	0	0	6.07046e-05	0.00303442	3.07182e-05	5.89212e-06	0.000360276	0.00059328
Bacteria;Proteobacteria;Epsilonproteobacteria;Campylobacterales	0	22	63	175	393	1412	17	297	0	4.17706e-05	0.000119512	0.000332201	0.000603612	0.00207992	3.07773e-05	0.000568401
Bacteria;Cyanobacteria;Cyanobacteria_noname;Chroococcales	2	0	0	1490	10	0	17	11	3.50416e-06	0	0	0.00282846	1.53591e-05	0	3.07773e-05	2.10519e-05
Bacteria;Actinobacteria;Actinobacteria;Streptomycetales	0	390	60	898	19	0	47	77	0	0.000740479	0.000113821	0.00170467	2.91823e-05	0	8.50902e-05	0.000147363
Bacteria;Proteobacteria;Deltaproteobacteria;Myxococcales	594	320	5	78	581	0	0	19	0.00104074	0.000607573	9.48509e-06	0.000148067	0.000892363	0	0	3.63623e-05
Bacteria;Proteobacteria;Deltaproteobacteria;Desulfobacterales	0	0	3	1293	3	0	0	0	0	0	5.69106e-06	0.00245449	4.60773e-06	0	0	0
Archaea;Archaea_noname;Archaea_noname;Archaea_noname	0	45	0	512	0	793	2	17	0	8.54399e-05	0	0.000971926	0	0.00116811	3.62086e-06	3.25347e-05
Bacteria;Proteobacteria;Gammaproteobacteria;Cellvibrionales	0	0	0	964	0	0	13	17	0	0	0	0.00182995	0	0	2.35356e-05	3.25347e-05
Bacteria;Bacteroidetes;Bacteroidia;Bacteroidales	0	9	18	425	2	7	427	11	0	1.7088e-05	3.41463e-05	0.000806774	3.07182e-06	1.03112e-05	0.000773054	2.10519e-05
Bacteria;Proteobacteria;Gammaproteobacteria;Chromatiales	5	23	0	706	0	0	0	104	8.76041e-06	4.36693e-05	0	0.00134019	0	0	0	0.000199036
Bacteria;Proteobacteria;Betaproteobacteria;Betaproteobacteria_noname	0	290	203	100	79	0	0	78	0	0.000550613	0.000385095	0.000189829	0.000121337	0	0	0.000149277
Bacteria;Proteobacteria;Betaproteobacteria;Nitrosomonadales	0	0	64	487	11	0	0	16	0	0	0.000121409	0.000924468	1.6895e-05	0	0	3.06209e-05
Bacteria;Cyanobacteria;Cyanobacteria_noname;Chroococcidiopsidales	0	0	11	0	0	0	0	542	0	0	2.08672e-05	0	0	0	0	0.00103728
Bacteria;Cyanobacteria;Cyanobacteria_noname;Synechococcales	0	0	0	453	35	0	0	35	0	0	0	0.000859927	5.37568e-05	0	0	6.69833e-05
Bacteria;Actinobacteria;Actinobacteria;Bifidobacteriales	6	369	0	10	17	17	5	63	1.05125e-05	0.000700607	0	1.89829e-05	2.61105e-05	2.50415e-05	9.05215e-06	0.00012057
Bacteria;Proteobacteria;Gammaproteobacteria;Thiotrichales	0	0	0	469	0	0	0	0	0	0	0	0.000890299	0	0	0	0
Bacteria;Proteobacteria;Epsilonproteobacteria;Epsilonproteobacteria_noname	0	0	0	406	0	0	0	0	0	0	0	0.000770707	0	0	0	0
Bacteria;Firmicutes;Tissierellia;Tissierellales	0	5	62	275	16	5	3	0	0	9.49332e-06	0.000117615	0.00052203	2.45746e-05	7.36515e-06	5.43129e-06	0
Bacteria;Firmicutes;Tissierellia;Tissierellia_noname	4	26	0	324	0	0	0	0	7.00833e-06	4.93653e-05	0	0.000615047	0	0	0	0
Bacteria;Proteobacteria;Gammaproteobacteria;Legionellales	0	0	0	316	0	0	0	0	0	0	0	0.00059986	0	0	0	0
Bacteria;Nitrospirae;Nitrospira;Nitrospirales	0	21	16	191	18	0	0	29	0	3.9872e-05	3.03523e-05	0.000362574	2.76464e-05	0	0	5.55004e-05
Bacteria;Bacteroidetes;Sphingobacteriia;Sphingobacteriales	0	0	0	236	4	0	0	0	0	0	0	0.000447997	6.14364e-06	0	0	0
Bacteria;Proteobacteria;Gammaproteobacteria;Methylococcales	0	11	0	203	0	0	0	0	0	2.08853e-05	0	0.000385353	0	0	0	0
Bacteria;Cyanobacteria;Cyanobacteria_noname;Nostocales	0	31	2	13	135	0	0	47	0	5.88586e-05	3.79404e-06	2.46778e-05	0.000207348	0	0	8.9949e-05
Bacteria;Proteobacteria;Alphaproteobacteria;Sphingomonadales	5	80	0	70	8	0	0	6	8.76041e-06	0.000151893	0	0.00013288	1.22873e-05	0	0	1.14828e-05
Bacteria;Verrucomicrobia;Verrucomicrobia_noname;Verrucomicrobia_noname	0	16	0	118	12	0	0	14	0	3.03786e-05	0	0.000223999	1.84309e-05	0	0	2.67933e-05
Bacteria;Proteobacteria;Betaproteobacteria;Rhodocyclales	0	51	0	61	0	0	7	0	0	9.68319e-05	0	0.000115796	0	0	1.2673e-05	0
Bacteria;Lentisphaerae;Lentisphaerae_noname;Lentisphaerae_noname	5	91	2	0	0	0	0	0	8.76041e-06	0.000172778	3.79404e-06	0	0	0	0	0
Bacteria;Chlamydiae;Chlamydiia;Chlamydiales	3	24	1	0	78	3	0	0	5.25624e-06	4.55679e-05	1.89702e-06	0	0.000119801	4.41909e-06	0	0
Bacteria;Proteobacteria;Deltaproteobacteria;Syntrophobacterales	0	0	75	15	0	0	0	0	0	0	0.000142276	2.84744e-05	0	0	0	0
Bacteria;Spirochaetes;Spirochaetia;Leptospirales	0	0	0	82	0	0	0	0	0	0	0	0.00015566	0	0	0	0
Bacteria;Candidatus_Sumerlaeota;Candidatus_Sumerlaeota_noname;Candidatus_Sumerlaeota_noname	0	67	0	14	0	0	0	0	0	0.000127211	0	2.65761e-05	0	0	0	0
Bacteria;Cyanobacteria;Cyanobacteria_noname;Cyanobacteria_noname	0	0	0	0	0	0	0	80	0	0	0	0	0	0	0	0.000153105
Bacteria;Firmicutes;Negativicutes;Veillonellales	0	0	0	0	0	0	0	72	0	0	0	0	0	0	0	0.000137794
Bacteria;Actinobacteria;Actinobacteria;Kineosporiales	0	0	5	51	0	1	14	0	0	0	9.48509e-06	9.68129e-05	0	1.47303e-06	2.5346e-05	0
Bacteria;Proteobacteria;Gammaproteobacteria;Orbales	0	0	0	31	0	0	0	36	0	0	0	5.88471e-05	0	0	0	6.88971e-05
Bacteria;Proteobacteria;Alphaproteobacteria;Alphaproteobacteria_noname	0	31	0	0	0	0	0	32	0	5.88586e-05	0	0	0	0	0	6.12418e-05
Bacteria;Candidatus_Microgenomates;Candidatus_Microgenomates_noname;Candidatus_Microgenomates_noname	0	62	0	0	0	0	0	0	0	0.000117717	0	0	0	0	0	0
Bacteria;Acidobacteria;Acidobacteria_noname;Acidobacteria_noname	0	36	0	16	0	0	0	6	0	6.83519e-05	0	3.03727e-05	0	0	0	1.14828e-05
Bacteria;Actinobacteria;Actinobacteria;Pseudonocardiales	0	0	0	28.5	0	0	28	0	0	0	0	5.41013e-05	0	0	5.0692e-05	0
Bacteria;Balneolaeota;Balneolia;Balneolales	0	0	0	50	0	0	0	0	0	0	0	9.49146e-05	0	0	0	0
Bacteria;Fusobacteria;Fusobacteriia;Fusobacteriales	40	0	0	0	0	14	0	0	7.00833e-05	0	0	0	0	2.06224e-05	0	0
Bacteria;Proteobacteria;Alphaproteobacteria;Caulobacterales	0	0	0	44	3	0	0	1	0	0	0	8.35249e-05	4.60773e-06	0	0	1.91381e-06
Bacteria;Chloroflexi;Anaerolineae;Anaerolineales	0	0	0	46	0	0	0	0	0	0	0	8.73215e-05	0	0	0	0
Bacteria;Actinobacteria;Actinobacteria;Micromonosporales	0	0	24	19	0	0	0	0	0	0	4.55284e-05	3.60676e-05	0	0	0	0
Bacteria;Bacteroidetes;Bacteroidetes_noname;Bacteroidetes_noname	0	0	1	41	0	0	0	0	0	0	1.89702e-06	7.783e-05	0	0	0	0
Bacteria;Proteobacteria;Alphaproteobacteria;Rickettsiales	0	0	0	40	0	0	1	0	0	0	0	7.59317e-05	0	0	1.81043e-06	0
Bacteria;Actinobacteria;Actinobacteria;Actinomycetales	0	25	0	11	0	0	0	0	0	4.74666e-05	0	2.08812e-05	0	0	0	0
Bacteria;Candidatus_Omnitrophica;Candidatus_Omnitrophica_noname;Candidatus_Omnitrophica_noname	0	0	0	0	41	0	0	0	0	0	0	0	6.29723e-05	0	0	0
Bacteria;Planctomycetes;Planctomycetia;Candidatus_Brocadiales	0	0	0	33	0	0	0	0	0	0	0	6.26437e-05	0	0	0	0
Bacteria;Actinobacteria;Coriobacteriia;Eggerthellales	0	19	0	0	0	0	11	0	0	3.60746e-05	0	0	0	0	1.99147e-05	0
Bacteria;Firmicutes;Firmicutes_noname;Firmicutes_noname	0	10	0	16	0	0	0	0	0	1.89866e-05	0	3.03727e-05	0	0	0	0
Bacteria;Acidobacteria;Solibacteres;Solibacterales	0	0	0	24	1	0	0	0	0	0	0	4.5559e-05	1.53591e-06	0	0	0
Bacteria;Proteobacteria;Deltaproteobacteria;Deltaproteobacteria_noname	0	0	0	10	0	0	0	14	0	0	0	1.89829e-05	0	0	0	2.67933e-05
Bacteria;Spirochaetes;Spirochaetes_noname;Spirochaetes_noname	0	0	0	12	0	0	0	8	0	0	0	2.27795e-05	0	0	0	1.53105e-05
Bacteria;Firmicutes;Erysipelotrichia;Erysipelotrichales	0	0	0	20	0	0	0	0	0	0	0	3.79659e-05	0	0	0	0
Bacteria;Acidobacteria;Holophagae;Holophagae_noname	0	0	0	18	0	0	0	0	0	0	0	3.41693e-05	0	0	0	0
Bacteria;Actinobacteria;Coriobacteriia;Coriobacteriales	0.5	7	0	0	10	0	0	0	8.76041e-07	1.32907e-05	0	0	1.53591e-05	0	0	0
Bacteria;Firmicutes;Clostridia;Thermoanaerobacterales	0	0	0	0	0	0	0	15	0	0	0	0	0	0	0	2.87071e-05
Bacteria;Proteobacteria;Acidithiobacillia;Acidithiobacillales	0	15	0	0	0	0	0	0	0	2.848e-05	0	0	0	0	0	0
Archaea;Euryarchaeota;Methanomicrobia;Methanosarcinales	0	0	0	15	0	0	0	0	0	0	0	2.84744e-05	0	0	0	0
Bacteria;Chloroflexi;Chloroflexi_noname;Chloroflexi_noname	0	14	0	0	0	0	0	0	0	2.65813e-05	0	0	0	0	0	0
Bacteria;Candidatus_Hydrogenedentes;Candidatus_Hydrogenedentes_noname;Candidatus_Hydrogenedentes_noname	0	12	0	0	0	0	0	0	0	2.2784e-05	0	0	0	0	0	0
Bacteria;Bacteroidetes;Chitinophagia;Chitinophagales	0	0	0	12	0	0	0	0	0	0	0	2.27795e-05	0	0	0	0
Bacteria;Proteobacteria;Zetaproteobacteria;Zetaproteobacteria_noname	0	0	0	10	0	0	0	0	0	0	0	1.89829e-05	0	0	0	0
Bacteria;Deinococcus-Thermus;Deinococci;Thermales	0	0	0	0	0	0	0	9	0	0	0	0	0	0	0	1.72243e-05
Archaea;Euryarchaeota;Halobacteria;Haloferacales	0	8	0	0	0	0	0	0	0	1.51893e-05	0	0	0	0	0	0
Bacteria;Spirochaetes;Spirochaetia;Brachyspirales	0	0	0	8	0	0	0	0	0	0	0	1.51863e-05	0	0	0	0
Bacteria;Actinobacteria;Actinobacteria;Catenulisporales	0	0	0	8	0	0	0	0	0	0	0	1.51863e-05	0	0	0	0
Bacteria;Proteobacteria;Gammaproteobacteria;Enterobacterales;Enterobacteriaceae	5.55858e+07	48089949	3.71281e+07	10434476	6.2959e+07	65846848	5.3303e+07	4.8079e+07	97.3908	91.3067	70.4327	19.8077	96.6994	96.9944	96.5014	92.0139
Bacteria;Proteobacteria;Gammaproteobacteria;Pseudomonadales;Moraxellaceae	15555	712074	194344	2.15568e+07	206038	22209.5	130763	18231.5	0.0272536	1.35199	0.368674	40.9211	0.316455	0.0327153	0.236737	0.0348916
Bacteria;Proteobacteria;Gammaproteobacteria;Enterobacterales;Erwiniaceae	24020	22523	17664.5	12480399	129377	25896.5	62994.5	60817	0.042085	0.0427636	0.0335099	23.6914	0.198711	0.0381463	0.114047	0.116392
Bacteria;Proteobacteria;Gammaproteobacteria;Enterobacterales;Hafniaceae	74	627	6.44555e+06	5964	39	0	731	1241935	0.000129654	0.00119046	12.2273	0.0113214	5.99005e-05	0	0.00132342	2.37682
Bacteria;Firmicutes;Bacilli;Lactobacillales;Carnobacteriaceae	1583	19648	756	2.50516e+06	91	17	379	39	0.00277354	0.037305	0.00143415	4.75552	0.000139768	2.50415e-05	0.000686153	7.46385e-05
Bacteria;Proteobacteria;Gammaproteobacteria;Pseudomonadales;Pseudomonadaceae	23683	66600	552395	1.01325e+06	29775.5	38416.5	30129	84819	0.0414945	0.126451	1.0479	1.92344	0.0457325	0.0565887	0.0545464	0.162327
Bacteria;Firmicutes;Bacilli;Lactobacillales;Streptococcaceae	1170	10521	514963	784	3633.5	15670	954	73330	0.00204994	0.0199758	0.976894	0.00148826	0.00558073	0.0230824	0.00172715	0.14034
Bacteria;Firmicutes;Bacilli;Lactobacillales;Enterococcaceae	14174.5	201747	12993	72787	9650.5	33926.5	17385	2541.5	0.0248349	0.38305	0.024648	0.138171	0.0148223	0.0499748	0.0314743	0.00486394
Bacteria;Firmicutes;Bacilli;Lactobacillales;Aerococcaceae	28621	308547	14	5683	46.5	28.5	220	8	0.0501463	0.585827	2.65583e-05	0.010788	7.14198e-05	4.19814e-05	0.000398295	1.53105e-05
Bacteria;Firmicutes;Bacilli;Lactobacillales;Lactobacillaceae	6892.5	140393	1801	2648.5	63786	20496.5	7110	10686.5	0.0120762	0.266559	0.00341653	0.00502763	0.0979695	0.030192	0.0128722	0.0204519
Bacteria;Proteobacteria;Gammaproteobacteria;Enterobacterales;Yersiniaceae	7870	32013.5	52675	33204.5	60471	7339.5	10133	22550	0.0137889	0.0607829	0.0999255	0.0630319	0.092878	0.0108113	0.0183451	0.0431564
Bacteria;Proteobacteria;Gammaproteobacteria;Aeromonadales;Aeromonadaceae	169	115170	11286.5	8170	391	19	5	951	0.000296102	0.218668	0.0214107	0.0155091	0.000600541	2.79876e-05	9.05215e-06	0.00182003
Bacteria;Proteobacteria;Alphaproteobacteria;Rhodobacterales;Rhodobacteraceae	1	50	403	119539	114	53.5	42	318	1.75208e-06	9.49332e-05	0.000764499	0.22692	0.000175094	7.88071e-05	7.60381e-05	0.000608591
Bacteria;Proteobacteria;Betaproteobacteria;Burkholderiales;Burkholderiaceae	23310	14029	7159	6204	19767	18301	21419	10846	0.040841	0.0266364	0.0135808	0.011777	0.0303603	0.0269579	0.0387776	0.0207572
Bacteria;Actinobacteria;Actinobacteria;Micrococcales;Micrococcaceae	0	27	3555.5	75618	466	500	17786.5	287	0	5.12639e-05	0.00674485	0.143545	0.000715734	0.000736515	0.0322012	0.000549263
Bacteria;Proteobacteria;Gammaproteobacteria;Oceanospirillales;Halomonadaceae	13401	11788	5732	5356	14323.5	17132	12506	10501.5	0.0234796	0.0223815	0.0108737	0.0101673	0.0219996	0.0252359	0.0226412	0.0200979
Bacteria;Firmicutes;Bacilli;Bacillales;Listeriaceae	3268	66664	194	5023	515	2802.5	1010	191	0.0057258	0.126573	0.000368022	0.00953512	0.000790993	0.00412817	0.00182853	0.000365537
Bacteria;Proteobacteria;Gammaproteobacteria;Vibrionales;Vibrionaceae	6174	5412	12570	17825	6424	6526	5627	5278	0.0108173	0.0102756	0.0238455	0.0338371	0.00986668	0.00961299	0.0101873	0.0101011
Bacteria;Firmicutes;Bacilli;Bacillales;Bacillaceae	538	28002	1317	21270	1041	3435	1040	329	0.00094262	0.0531664	0.00249837	0.0403767	0.00159888	0.00505986	0.00188285	0.000629643
Bacteria;Actinobacteria;Actinobacteria;Corynebacteriales;Mycobacteriaceae	10396	5441	1806	2902	8933	15863	10072	6334	0.0182146	0.0103306	0.00342602	0.00550884	0.0137203	0.0233667	0.0182346	0.0121221
Bacteria;Proteobacteria;Gammaproteobacteria;Xanthomonadales;Xanthomonadaceae	12754	6672	1613	7025	8575	8578	9167	4695	0.022346	0.0126679	0.00305989	0.0133355	0.0131704	0.0126357	0.0165962	0.00898533
Bacteria;Proteobacteria;Gammaproteobacteria;Gammaproteobacteria_noname;Gammaproteobacteria_noname	7859	6797	1930	3568	8476.5	10009	9465	6819	0.0137696	0.0129052	0.00366125	0.00677311	0.0130191	0.0147436	0.0171357	0.0130503
Bacteria;Proteobacteria;Gammaproteobacteria;Enterobacterales;Morganellaceae	1028	236	3162	6349.5	827	34108	1152.5	1866	0.00180114	0.000448085	0.00599837	0.0120532	0.0012702	0.0502421	0.00208652	0.00357117
Bacteria;Proteobacteria;Betaproteobacteria;Burkholderiales;Alcaligenaceae	92	31672.5	1227	4836.5	120	0	132	466	0.000161191	0.0601355	0.00232764	0.00918109	0.000184309	0	0.000238977	0.000891834
Bacteria;Proteobacteria;Gammaproteobacteria;Enterobacterales;Pectobacteriaceae	0	6440	18665	3435	245	5	93	4347	0	0.0122274	0.0354079	0.00652063	0.000376298	7.36515e-06	0.00016837	0.00831932
Bacteria;Firmicutes;Clostridia;Clostridiales;Clostridiaceae	49	12936	319	13745	295	2296	37	82	8.5852e-05	0.0245611	0.000605149	0.026092	0.000453093	0.00338208	6.69859e-05	0.000156932
Bacteria;Actinobacteria;Actinobacteria;Micrococcales;Microbacteriaceae	4491	4492	791	2272	5806	2864	2876	2574	0.0078686	0.0085288	0.00150054	0.00431292	0.00891749	0.00421876	0.0052068	0.00492614
Bacteria;Proteobacteria;Alphaproteobacteria;Rhizobiales;Rhizobiaceae	1099	2329	327	4646	3132	4240	3876	2611	0.00192554	0.00442199	0.000620325	0.00881947	0.00481047	0.00624565	0.00701723	0.00499695
Bacteria;Proteobacteria;Gammaproteobacteria;Pasteurellales;Pasteurellaceae	0	0	49	13923	33.5	305	121	15	0	0	9.29539e-05	0.0264299	5.1453e-05	0.000449274	0.000219062	2.87071e-05
Bacteria;Bacteroidetes;Cytophagia;Cytophagales;Hymenobacteraceae	0	0	0	12393	0	0	0	0	0	0	0	0.0235255	0	0	0	0
Bacteria;Proteobacteria;Betaproteobacteria;Burkholderiales;Comamonadaceae	20	545	1236	3990	544	3475	2063	731	3.50416e-05	0.00103477	0.00234472	0.00757419	0.000835535	0.00511878	0.00373492	0.00139899
Bacteria;Firmicutes;Bacilli;Bacillales;Staphylococcaceae	193	2457	33	5433	1312	1697	38	79	0.000338152	0.00466502	6.26016e-05	0.0103134	0.00201511	0.00249973	6.87963e-05	0.000151191
Bacteria;Bacteroidetes;Flavobacteriia;Flavobacteriales;Flavobacteriaceae	0	73	299	7263	288	3	57	9	0	0.000138603	0.000567209	0.0137873	0.000442342	4.41909e-06	0.000103194	1.72243e-05
Bacteria;Firmicutes;Clostridia;Clostridiales;Lachnospiraceae	0	0	0	5767	1067	0	0	0	0	0	0	0.0109475	0.00163882	0	0	0
Bacteria;Proteobacteria;Gammaproteobacteria;Oceanospirillales;Alcanivoracaceae	2078	0	0	200	1908	2545	982	0	0.00364082	0	0	0.000379659	0.00293052	0.00374886	0.00177784	0
Bacteria;Firmicutes;Bacilli;Lactobacillales;Leuconostocaceae	477	2027	471	202.5	819	2463	116	415.5	0.000835743	0.00384859	0.000893496	0.000384404	0.00125791	0.00362807	0.00021001	0.000795187
Bacteria;Proteobacteria;Alphaproteobacteria;Rhodospirillales;Rhodospirillales_noname	0	0	10	5326	22	1	2	9	0	0	1.89702e-05	0.0101103	3.379e-05	1.47303e-06	3.62086e-06	1.72243e-05
Bacteria;Proteobacteria;Betaproteobacteria;Neisseriales;Neisseriaceae	61	237	261	3596	94	49	10	93	0.000106877	0.000449983	0.000495122	0.00682626	0.000144375	7.21785e-05	1.81043e-05	0.000177984
Bacteria;Bacteria_noname;Bacteria_noname;Bacteria_noname;Bacteria_noname	701	345	11	330	835	1632	1052	5	0.00122821	0.000655039	2.08672e-05	0.000626437	0.00128248	0.00240398	0.00190457	9.56904e-06
Bacteria;Actinobacteria;Actinobacteria;Corynebacteriales;Nocardiaceae	500	520	277	84	574	461	1617	271	0.000876041	0.000987306	0.000525474	0.000159457	0.000881612	0.000679067	0.00292746	0.000518642
Bacteria;Proteobacteria;Gammaproteobacteria;Enterobacterales;Budviciaceae	0	0	2918	0	0	0	0	646	0	0	0.0055355	0	0	0	0	0.00123632
Bacteria;Proteobacteria;Alphaproteobacteria;Rhizobiales;Phyllobacteriaceae	0	34	0	3079	20	0	4	25	0	6.45546e-05	0	0.00584484	3.07182e-05	0	7.24172e-06	4.78452e-05
Bacteria;Proteobacteria;Gammaproteobacteria;Alteromonadales;Pseudoalteromonadaceae	0	14	6	3105	0	0	20	0	0	2.65813e-05	1.13821e-05	0.0058942	0	0	3.62086e-05	0
Bacteria;Gemmatimonadetes;Gemmatimonadetes_noname;Gemmatimonadetes_noname;Gemmatimonadetes_noname	0	0	176	109	482	812	1086	661	0	0	0.000333875	0.000206914	0.000740308	0.0011961	0.00196613	0.00126503
Bacteria;Actinobacteria;Actinobacteria;Propionibacteriales;Propionibacteriaceae	0	0	657	20	0	0	0	1823	0	0	0.00124634	3.79659e-05	0	0	0	0.00348887
Bacteria;Firmicutes;Bacilli;Bacillales;Planococcaceae	665	0	83	1050	36	938	0	0	0.00116513	0	0.000157453	0.00199321	5.52927e-05	0.0013817	0	0
Bacteria;Proteobacteria;Gammaproteobacteria;Enterobacterales;Enterobacterales_noname	0	32	1535	0	485	4	0	317	0	6.07573e-05	0.00291192	0	0.000744916	5.89212e-06	0	0.000606677
Bacteria;Proteobacteria;Betaproteobacteria;Burkholderiales;Oxalobacteraceae	8	132	413	1535	0	0	30	126	1.40167e-05	0.000250624	0.000783469	0.00291388	0	0	5.43129e-05	0.00024114
Bacteria;Proteobacteria;Gammaproteobacteria;Alteromonadales;Alteromonadaceae	0	0	7	2170	1	0	0	3	0	0	1.32791e-05	0.00411929	1.53591e-06	0	0	5.74142e-06
Bacteria;Proteobacteria;Gammaproteobacteria;Cardiobacteriales;Cardiobacteriaceae	0	0	32	1148	20	4	196	310	0	0	6.07046e-05	0.00217924	3.07182e-05	5.89212e-06	0.000354844	0.00059328
Bacteria;Cyanobacteria;Cyanobacteria_noname;Chroococcales;Chroococcaceae	0	0	0	1490	10	0	17	3	0	0	0	0.00282846	1.53591e-05	0	3.07773e-05	5.74142e-06
Bacteria;Actinobacteria;Actinobacteria;Streptomycetales;Streptomycetaceae	0	390	60	898	19	0	47	77	0	0.000740479	0.000113821	0.00170467	2.91823e-05	0	8.50902e-05	0.000147363
Bacteria;Firmicutes;Bacilli;Bacillales;Paenibacillaceae	8	201	904	43	0	0	7	307	1.40167e-05	0.000381632	0.0017149	8.16266e-05	0	0	1.2673e-05	0.000587539
Bacteria;Proteobacteria;Deltaproteobacteria;Myxococcales;Archangiaceae	594	320	5	78	581	0	0	19	0.00104074	0.000607573	9.48509e-06	0.000148067	0.000892363	0	0	3.63623e-05
Bacteria;Proteobacteria;Deltaproteobacteria;Desulfobacterales;Desulfobulbaceae	0	0	3	1260	2	0	0	0	0	0	5.69106e-06	0.00239185	3.07182e-06	0	0	0
Archaea;Archaea_noname;Archaea_noname;Archaea_noname;Archaea_noname	0	45	0	512	0	793	2	17	0	8.54399e-05	0	0.000971926	0	0.00116811	3.62086e-06	3.25347e-05
Bacteria;Proteobacteria;Gammaproteobacteria;Alteromonadales;Shewanellaceae	0	12	783	118	0	0	0	223	0	2.2784e-05	0.00148537	0.000223999	0	0	0	0.000426779
Bacteria;Proteobacteria;Gammaproteobacteria;Cellvibrionales;Cellvibrionaceae	0	0	0	964	0	0	13	0	0	0	0	0.00182995	0	0	2.35356e-05	0
Bacteria;Proteobacteria;Gammaproteobacteria;Oceanospirillales;Oceanospirillaceae	0	157	1	775	0	0	4	5	0	0.00029809	1.89702e-06	0.00147118	0	0	7.24172e-06	9.56904e-06
Bacteria;Proteobacteria;Alphaproteobacteria;Rhizobiales;Xanthobacteraceae	0	0	0	908	0	0	0	0	0	0	0	0.00172365	0	0	0	0
Bacteria;Proteobacteria;Alphaproteobacteria;Rhizobiales;Brucellaceae	0	0	9	882	0	0	1	4	0	0	1.70732e-05	0.00167429	0	0	1.81043e-06	7.65523e-06
Bacteria;Proteobacteria;Epsilonproteobacteria;Campylobacterales;Campylobacteraceae	0	22	21	162	158	313	17	297	0	4.17706e-05	3.98374e-05	0.000307523	0.000242674	0.000461058	3.07773e-05	0.000568401
Bacteria;Proteobacteria;Alphaproteobacteria;Rhodospirillales;Rhodospirillaceae	0	0	665	67	0	0	0	136	0	0	0.00126152	0.000127186	0	0	0	0.000260278
Bacteria;Proteobacteria;Gammaproteobacteria;Chromatiales;Chromatiaceae	5	23	0	631	0	0	0	104	8.76041e-06	4.36693e-05	0	0.00119782	0	0	0	0.000199036
Bacteria;Proteobacteria;Betaproteobacteria;Betaproteobacteria_noname;Betaproteobacteria_noname	0	290	203	100	79	0	0	78	0	0.000550613	0.000385095	0.000189829	0.000121337	0	0	0.000149277
Bacteria;Proteobacteria;Epsilonproteobacteria;Campylobacterales;Helicobacteraceae	0	0	25	13	187	650	0	0	0	0	4.74255e-05	2.46778e-05	0.000287215	0.000957469	0	0
Bacteria;Proteobacteria;Gammaproteobacteria;Alteromonadales;Moritellaceae	0	0	0	686	0	0	0	0	0	0	0	0.00130223	0	0	0	0
Bacteria;Proteobacteria;Betaproteobacteria;Nitrosomonadales;Nitrosomonadaceae	0	0	64	487	11	0	0	16	0	0	0.000121409	0.000924468	1.6895e-05	0	0	3.06209e-05
Bacteria;Cyanobacteria;Cyanobacteria_noname;Chroococcidiopsidales;Chroococcidiopsidaceae	0	0	11	0	0	0	0	542	0	0	2.08672e-05	0	0	0	0	0.00103728
Bacteria;Actinobacteria;Actinobacteria;Bifidobacteriales;Bifidobacteriaceae	6	369	0	10	17	17	5	63	1.05125e-05	0.000700607	0	1.89829e-05	2.61105e-05	2.50415e-05	9.05215e-06	0.00012057
Bacteria;Proteobacteria;Gammaproteobacteria;Cardiobacteriales;Cardiobacteriales_noname	0	0	0	450.5	0	0	3	0	0	0	0	0.000855181	0	0	5.43129e-06	0
Bacteria;Proteobacteria;Gammaproteobacteria;Oceanospirillales;Hahellaceae	7	161	158	11	0	0	0	114	1.22646e-05	0.000305685	0.000299729	2.08812e-05	0	0	0	0.000218174
Bacteria;Proteobacteria;Gammaproteobacteria;Thiotrichales;Thiotrichaceae	0	0	0	448	0	0	0	0	0	0	0	0.000850435	0	0	0	0
Bacteria;Firmicutes;Clostridia;Clostridiales;Ruminococcaceae	0	361	0	46	0	0	2	8	0	0.000685418	0	8.73215e-05	0	0	3.62086e-06	1.53105e-05
Bacteria;Proteobacteria;Epsilonproteobacteria;Epsilonproteobacteria_noname;Epsilonproteobacteria_noname	0	0	0	406	0	0	0	0	0	0	0	0.000770707	0	0	0	0
Bacteria;Firmicutes;Tissierellia;Tissierellales;Peptoniphilaceae	0	5	62	275	16	5	3	0	0	9.49332e-06	0.000117615	0.00052203	2.45746e-05	7.36515e-06	5.43129e-06	0
Bacteria;Firmicutes;Clostridia;Clostridiales;Peptostreptococcaceae	5	66	174	50	8	0.5	0	58	8.76041e-06	0.000125312	0.000330081	9.49146e-05	1.22873e-05	7.36515e-07	0	0.000111001
Bacteria;Firmicutes;Tissierellia;Tissierellia_noname;Tissierellia_noname	4	26	0	324	0	0	0	0	7.00833e-06	4.93653e-05	0	0.000615047	0	0	0	0
Bacteria;Bacteroidetes;Bacteroidia;Bacteroidales;Bacteroidaceae	0	9	0	314	2	0	0	0	0	1.7088e-05	0	0.000596064	3.07182e-06	0	0	0
Bacteria;Proteobacteria;Gammaproteobacteria;Legionellales;Legionellaceae	0	0	0	316	0	0	0	0	0	0	0	0.00059986	0	0	0	0
Bacteria;Proteobacteria;Betaproteobacteria;Burkholderiales;Sutterellaceae	0	0	22	20	0	2	240	36	0	0	4.17344e-05	3.79659e-05	0	2.94606e-06	0.000434503	6.88971e-05
Bacteria;Bacteroidetes;Bacteroidia;Bacteroidales;Rikenellaceae	0	0	0	0	0	0	292	0	0	0	0	0	0	0	0.000528646	0
Bacteria;Nitrospirae;Nitrospira;Nitrospirales;Nitrospiraceae	0	21	16	191	18	0	0	29	0	3.9872e-05	3.03523e-05	0.000362574	2.76464e-05	0	0	5.55004e-05
Bacteria;Proteobacteria;Gammaproteobacteria;Pseudomonadales;Pseudomonadales_noname	0	10	30	191	34	0	2	4	0	1.89866e-05	5.69106e-05	0.000362574	5.22209e-05	0	3.62086e-06	7.65523e-06
Bacteria;Cyanobacteria;Cyanobacteria_noname;Synechococcales;Coelosphaeriaceae	0	0	0	247	6	0	0	0	0	0	0	0.000468878	9.21546e-06	0	0	0
Bacteria;Proteobacteria;Betaproteobacteria;Burkholderiales;Burkholderiales_noname	0	171	0	40	43	0	0	0	0	0.000324672	0	7.59317e-05	6.60441e-05	0	0	0
Bacteria;Bacteroidetes;Sphingobacteriia;Sphingobacteriales;Sphingobacteriaceae	0	0	0	236	4	0	0	0	0	0	0	0.000447997	6.14364e-06	0	0	0
Bacteria;Cyanobacteria;Cyanobacteria_noname;Synechococcales;Merismopediaceae	0	0	0	206	0	0	0	0	0	0	0	0.000391048	0	0	0	0
Bacteria;Proteobacteria;Gammaproteobacteria;Oceanospirillales;Oceanospirillales_noname	0	0	0	200	0	0	0	0	0	0	0	0.000379659	0	0	0	0
Bacteria;Bacteroidetes;Bacteroidia;Bacteroidales;Tannerellaceae	0	0	18	18	0	0	135	7	0	0	3.41463e-05	3.41693e-05	0	0	0.000244408	1.33967e-05
Bacteria;Proteobacteria;Alphaproteobacteria;Sphingomonadales;Sphingomonadaceae	5	80	0	70	8	0	0	6	8.76041e-06	0.000151893	0	0.00013288	1.22873e-05	0	0	1.14828e-05
Bacteria;Verrucomicrobia;Verrucomicrobia_noname;Verrucomicrobia_noname;Verrucomicrobia_noname	0	16	0	118	12	0	0	14	0	3.03786e-05	0	0.000223999	1.84309e-05	0	0	2.67933e-05
Bacteria;Actinobacteria;Actinobacteria;Propionibacteriales;Nocardioidaceae	0	0	0	129	0	0	17	0	0	0	0	0.00024488	0	0	3.07773e-05	0
Bacteria;Proteobacteria;Gammaproteobacteria;Methylococcales;Methylococcales_noname	0	0	0	145	0	0	0	0	0	0	0	0.000275252	0	0	0	0
Bacteria;Cyanobacteria;Cyanobacteria_noname;Nostocales;Nostocaceae	0	7	0	13	114	0	0	29	0	1.32907e-05	0	2.46778e-05	0.000175094	0	0	5.55004e-05
Bacteria;Proteobacteria;Betaproteobacteria;Neisseriales;Chromobacteriaceae	0	39	0	63	0	0	0	21	0	7.40479e-05	0	0.000119592	0	0	0	4.019e-05
Bacteria;Proteobacteria;Alphaproteobacteria;Rhizobiales;Aurantimonadaceae	0	0	0	115	0	0	0	0	0	0	0	0.000218304	0	0	0	0
Bacteria;Firmicutes;Clostridia;Clostridiales;Clostridiales_noname	5	105	0	0	0	0	0	0	8.76041e-06	0.00019936	0	0	0	0	0	0
Bacteria;Actinobacteria;Actinobacteria;Micrococcales;Brevibacteriaceae	0	0	0	89	0	0	17	0	0	0	0	0.000168948	0	0	3.07773e-05	0
Bacteria;Proteobacteria;Betaproteobacteria;Rhodocyclales;Zoogloeaceae	0	35	0	61	0	0	7	0	0	6.64533e-05	0	0.000115796	0	0	1.2673e-05	0
Bacteria;Lentisphaerae;Lentisphaerae_noname;Lentisphaerae_noname;Lentisphaerae_noname	5	91	2	0	0	0	0	0	8.76041e-06	0.000172778	3.79404e-06	0	0	0	0	0
Bacteria;Chlamydiae;Chlamydiia;Chlamydiales;Chlamydiaceae	3	24	1	0	78	3	0	0	5.25624e-06	4.55679e-05	1.89702e-06	0	0.000119801	4.41909e-06	0	0
Bacteria;Proteobacteria;Deltaproteobacteria;Syntrophobacterales;Syntrophaceae	0	0	75	15	0	0	0	0	0	0	0.000142276	2.84744e-05	0	0	0	0
Bacteria;Proteobacteria;Alphaproteobacteria;Rhizobiales;Beijerinckiaceae	0	37	0	23	35	0	0	0	0	7.02506e-05	0	4.36607e-05	5.37568e-05	0	0	0
Bacteria;Proteobacteria;Gammaproteobacteria;Xanthomonadales;Rhodanobacteraceae	0	23	0	55	7	0	0	0	0	4.36693e-05	0	0.000104406	1.07514e-05	0	0	0
Bacteria;Spirochaetes;Spirochaetia;Leptospirales;Leptospiraceae	0	0	0	82	0	0	0	0	0	0	0	0.00015566	0	0	0	0
Bacteria;Candidatus_Sumerlaeota;Candidatus_Sumerlaeota_noname;Candidatus_Sumerlaeota_noname;Candidatus_Sumerlaeota_noname	0	67	0	14	0	0	0	0	0	0.000127211	0	2.65761e-05	0	0	0	0
Bacteria;Cyanobacteria;Cyanobacteria_noname;Cyanobacteria_noname;Cyanobacteria_noname	0	0	0	0	0	0	0	80	0	0	0	0	0	0	0	0.000153105
Bacteria;Proteobacteria;Alphaproteobacteria;Rhodospirillales;Acetobacteraceae	0	22	16	38	1	0	0	0	0	4.17706e-05	3.03523e-05	7.21351e-05	1.53591e-06	0	0	0
Bacteria;Proteobacteria;Gammaproteobacteria;Chromatiales;Ectothiorhodospiraceae	0	0	0	75	0	0	0	0	0	0	0	0.000142372	0	0	0	0
Bacteria;Firmicutes;Negativicutes;Veillonellales;Veillonellaceae	0	0	0	0	0	0	0	72	0	0	0	0	0	0	0	0.000137794
Bacteria;Actinobacteria;Actinobacteria;Corynebacteriales;Corynebacteriaceae	0	0	0	72	0	0	0	0	0	0	0	0.000136677	0	0	0	0
Bacteria;Actinobacteria;Actinobacteria;Micrococcales;Dermabacteraceae	0	0	0	51	0	0	22	0	0	0	0	9.68129e-05	0	0	3.98295e-05	0
Bacteria;Proteobacteria;Alphaproteobacteria;Rhizobiales;Methylobacteriaceae	0	18	0	53	0	0	0	0	0	3.4176e-05	0	0.00010061	0	0	0	0
Bacteria;Actinobacteria;Actinobacteria;Kineosporiales;Kineosporiaceae	0	0	5	51	0	1	14	0	0	0	9.48509e-06	9.68129e-05	0	1.47303e-06	2.5346e-05	0
Bacteria;Proteobacteria;Gammaproteobacteria;Methylococcales;Methylococcaceae	0	11	0	58	0	0	0	0	0	2.08853e-05	0	0.000110101	0	0	0	0
Bacteria;Proteobacteria;Gammaproteobacteria;Orbales;Orbaceae	0	0	0	31	0	0	0	36	0	0	0	5.88471e-05	0	0	0	6.88971e-05
Bacteria;Proteobacteria;Alphaproteobacteria;Alphaproteobacteria_noname;Alphaproteobacteria_noname	0	31	0	0	0	0	0	32	0	5.88586e-05	0	0	0	0	0	6.12418e-05
Bacteria;Candidatus_Microgenomates;Candidatus_Microgenomates_noname;Candidatus_Microgenomates_noname;Candidatus_Microgenomates_noname	0	62	0	0	0	0	0	0	0	0.000117717	0	0	0	0	0	0
Bacteria;Cyanobacteria;Cyanobacteria_noname;Synechococcales;Leptolyngbyaceae	0	0	0	0	29	0	0	35	0	0	0	0	4.45414e-05	0	0	6.69833e-05
Bacteria;Acidobacteria;Acidobacteria_noname;Acidobacteria_noname;Acidobacteria_noname	0	36	0	16	0	0	0	6	0	6.83519e-05	0	3.03727e-05	0	0	0	1.14828e-05
Bacteria;Actinobacteria;Actinobacteria;Pseudonocardiales;Pseudonocardiaceae	0	0	0	28.5	0	0	28	0	0	0	0	5.41013e-05	0	0	5.0692e-05	0
Bacteria;Firmicutes;Clostridia;Clostridiales;Peptococcaceae	17	0	0	36	0	0	0	0	2.97854e-05	0	0	6.83385e-05	0	0	0	0
Bacteria;Balneolaeota;Balneolia;Balneolales;Balneolaceae	0	0	0	50	0	0	0	0	0	0	0	9.49146e-05	0	0	0	0
Bacteria;Bacteroidetes;Cytophagia;Cytophagales;Cytophagaceae	0	0	0	50	0	0	0	0	0	0	0	9.49146e-05	0	0	0	0
Bacteria;Actinobacteria;Actinobacteria;Micrococcales;Intrasporangiaceae	0	0	3	34	0	0	13	0	0	0	5.69106e-06	6.45419e-05	0	0	2.35356e-05	0
Bacteria;Proteobacteria;Alphaproteobacteria;Rhizobiales;Rhodobiaceae	0	0	48	0	0	0	0	0	0	0	9.10569e-05	0	0	0	0	0
Bacteria;Proteobacteria;Alphaproteobacteria;Caulobacterales;Caulobacteraceae	0	0	0	44	3	0	0	1	0	0	0	8.35249e-05	4.60773e-06	0	0	1.91381e-06
Bacteria;Actinobacteria;Actinobacteria;Micrococcales;Cellulomonadaceae	19	0	0	0	36	0	0	0	3.32895e-05	0	0	0	5.52927e-05	0	0	0
Bacteria;Chloroflexi;Anaerolineae;Anaerolineales;Anaerolineaceae	0	0	0	46	0	0	0	0	0	0	0	8.73215e-05	0	0	0	0
Bacteria;Actinobacteria;Actinobacteria;Micromonosporales;Micromonosporaceae	0	0	24	19	0	0	0	0	0	0	4.55284e-05	3.60676e-05	0	0	0	0
Bacteria;Bacteroidetes;Bacteroidetes_noname;Bacteroidetes_noname;Bacteroidetes_noname	0	0	1	41	0	0	0	0	0	0	1.89702e-06	7.783e-05	0	0	0	0
Bacteria;Proteobacteria;Alphaproteobacteria;Rhizobiales;Methylocystaceae	0	0	0	41	0	0	1	0	0	0	0	7.783e-05	0	0	1.81043e-06	0
Bacteria;Bacteroidetes;Bacteroidia;Bacteroidales;Muribaculaceae	0	0	0	41	0	0	0	0	0	0	0	7.783e-05	0	0	0	0
Bacteria;Proteobacteria;Alphaproteobacteria;Rickettsiales;Rickettsiales_noname	0	0	0	40	0	0	1	0	0	0	0	7.59317e-05	0	0	1.81043e-06	0
Bacteria;Fusobacteria;Fusobacteriia;Fusobacteriales;Leptotrichiaceae	40	0	0	0	0	0	0	0	7.00833e-05	0	0	0	0	0	0	0
Bacteria;Actinobacteria;Actinobacteria;Actinomycetales;Actinomycetaceae	0	25	0	11	0	0	0	0	0	4.74666e-05	0	2.08812e-05	0	0	0	0
Bacteria;Actinobacteria;Actinobacteria;Micrococcales;Promicromonosporaceae	0	11	0	25	0	0	0	0	0	2.08853e-05	0	4.74573e-05	0	0	0	0
Bacteria;Proteobacteria;Deltaproteobacteria;Desulfobacterales;Desulfobacteraceae	0	0	0	33	1	0	0	0	0	0	0	6.26437e-05	1.53591e-06	0	0	0
Bacteria;Bacteroidetes;Cytophagia;Cytophagales;Cyclobacteriaceae	4	28	0	0	0	0	0	2	7.00833e-06	5.31626e-05	0	0	0	0	0	3.82762e-06
Bacteria;Candidatus_Omnitrophica;Candidatus_Omnitrophica_noname;Candidatus_Omnitrophica_noname;Candidatus_Omnitrophica_noname	0	0	0	0	41	0	0	0	0	0	0	0	6.29723e-05	0	0	0
Bacteria;Planctomycetes;Planctomycetia;Candidatus_Brocadiales;Candidatus_Brocadiaceae	0	0	0	33	0	0	0	0	0	0	0	6.26437e-05	0	0	0	0
Bacteria;Actinobacteria;Actinobacteria;Micrococcales;Dermatophilaceae	0	0	0	27	0	0	6	0	0	0	0	5.12539e-05	0	0	1.08626e-05	0
Bacteria;Proteobacteria;Alphaproteobacteria;Rhizobiales;Hyphomicrobiaceae	0	8	0	23	0	0	0	0	0	1.51893e-05	0	4.36607e-05	0	0	0	0
Bacteria;Bacteroidetes;Cytophagia;Cytophagales;Flammeovirgaceae	0	0	0	31	0	0	0	0	0	0	0	5.88471e-05	0	0	0	0
Bacteria;Actinobacteria;Coriobacteriia;Eggerthellales;Eggerthellaceae	0	19	0	0	0	0	11	0	0	3.60746e-05	0	0	0	0	1.99147e-05	0
Bacteria;Proteobacteria;Alphaproteobacteria;Rhizobiales;Bradyrhizobiaceae	0	0	0	16	0	0	0	12	0	0	0	3.03727e-05	0	0	0	2.29657e-05
Bacteria;Firmicutes;Firmicutes_noname;Firmicutes_noname;Firmicutes_noname	0	10	0	16	0	0	0	0	0	1.89866e-05	0	3.03727e-05	0	0	0	0
Bacteria;Bacteroidetes;Bacteroidia;Bacteroidales;Prevotellaceae	0	0	0	26	0	0	0	0	0	0	0	4.93556e-05	0	0	0	0
Bacteria;Acidobacteria;Solibacteres;Solibacterales;Solibacteraceae	0	0	0	24	1	0	0	0	0	0	0	4.5559e-05	1.53591e-06	0	0	0
Bacteria;Proteobacteria;Deltaproteobacteria;Deltaproteobacteria_noname;Deltaproteobacteria_noname	0	0	0	10	0	0	0	14	0	0	0	1.89829e-05	0	0	0	2.67933e-05
Bacteria;Cyanobacteria;Cyanobacteria_noname;Nostocales;Aphanizomenonaceae	0	24	0	0	0	0	0	0	0	4.55679e-05	0	0	0	0	0	0
Bacteria;Proteobacteria;Alphaproteobacteria;Rhizobiales;Rhizobiales_noname	0	0	0	22	0	0	0	0	0	0	0	4.17624e-05	0	0	0	0
Bacteria;Proteobacteria;Gammaproteobacteria;Thiotrichales;Thiolinaceae	0	0	0	21	0	0	0	0	0	0	0	3.98641e-05	0	0	0	0
Bacteria;Spirochaetes;Spirochaetes_noname;Spirochaetes_noname;Spirochaetes_noname	0	0	0	12	0	0	0	8	0	0	0	2.27795e-05	0	0	0	1.53105e-05
Bacteria;Firmicutes;Erysipelotrichia;Erysipelotrichales;Erysipelotrichaceae	0	0	0	20	0	0	0	0	0	0	0	3.79659e-05	0	0	0	0
Bacteria;Acidobacteria;Holophagae;Holophagae_noname;Holophagae_noname	0	0	0	18	0	0	0	0	0	0	0	3.41693e-05	0	0	0	0
Bacteria;Proteobacteria;Gammaproteobacteria;Cellvibrionales;Halieaceae	0	0	0	0	0	0	0	17	0	0	0	0	0	0	0	3.25347e-05
Bacteria;Proteobacteria;Gammaproteobacteria;Oceanospirillales;Endozoicomonadaceae	0	12	0	5	0	0	0	0	0	2.2784e-05	0	9.49146e-06	0	0	0	0
Bacteria;Firmicutes;Bacilli;Bacillales;Bacillales_noname	0	0	0	0	21	0	0	0	0	0	0	0	3.22541e-05	0	0	0
Bacteria;Proteobacteria;Betaproteobacteria;Rhodocyclales;Rhodocyclales_noname	0	16	0	0	0	0	0	0	0	3.03786e-05	0	0	0	0	0	0
Bacteria;Actinobacteria;Coriobacteriia;Coriobacteriales;Coriobacteriaceae	0.5	7	0	0	10	0	0	0	8.76041e-07	1.32907e-05	0	0	1.53591e-05	0	0	0
Bacteria;Firmicutes;Clostridia;Thermoanaerobacterales;Thermoanaerobacteraceae	0	0	0	0	0	0	0	15	0	0	0	0	0	0	0	2.87071e-05
Bacteria;Proteobacteria;Acidithiobacillia;Acidithiobacillales;Acidithiobacillaceae	0	15	0	0	0	0	0	0	0	2.848e-05	0	0	0	0	0	0
Archaea;Euryarchaeota;Methanomicrobia;Methanosarcinales;Methanosaetaceae	0	0	0	15	0	0	0	0	0	0	0	2.84744e-05	0	0	0	0
Bacteria;Chloroflexi;Chloroflexi_noname;Chloroflexi_noname;Chloroflexi_noname	0	14	0	0	0	0	0	0	0	2.65813e-05	0	0	0	0	0	0
Bacteria;Bacteroidetes;Bacteroidia;Bacteroidales;Bacteroidales_noname	0	0	0	14	0	0	0	0	0	0	0	2.65761e-05	0	0	0	0
Bacteria;Candidatus_Hydrogenedentes;Candidatus_Hydrogenedentes_noname;Candidatus_Hydrogenedentes_noname;Candidatus_Hydrogenedentes_noname	0	12	0	0	0	0	0	0	0	2.2784e-05	0	0	0	0	0	0
Bacteria;Bacteroidetes;Chitinophagia;Chitinophagales;Chitinophagaceae	0	0	0	12	0	0	0	0	0	0	0	2.27795e-05	0	0	0	0
Bacteria;Firmicutes;Bacilli;Bacillales;Sporolactobacillaceae	0	11	0	0	0	0	0	0	0	2.08853e-05	0	0	0	0	0	0
Bacteria;Bacteroidetes;Cytophagia;Cytophagales;Cytophagales_noname	0	0	0	11	0	0	0	0	0	0	0	2.08812e-05	0	0	0	0
Bacteria;Fusobacteria;Fusobacteriia;Fusobacteriales;Fusobacteriaceae	0	0	0	0	0	14	0	0	0	0	0	0	0	2.06224e-05	0	0
Bacteria;Proteobacteria;Zetaproteobacteria;Zetaproteobacteria_noname;Zetaproteobacteria_noname	0	0	0	10	0	0	0	0	0	0	0	1.89829e-05	0	0	0	0
Bacteria;Deinococcus-Thermus;Deinococci;Thermales;Thermaceae	0	0	0	0	0	0	0	9	0	0	0	0	0	0	0	1.72243e-05
Archaea;Euryarchaeota;Halobacteria;Haloferacales;Haloferacaceae	0	8	0	0	0	0	0	0	0	1.51893e-05	0	0	0	0	0	0
Bacteria;Spirochaetes;Spirochaetia;Brachyspirales;Brachyspiraceae	0	0	0	8	0	0	0	0	0	0	0	1.51863e-05	0	0	0	0
Bacteria;Actinobacteria;Actinobacteria;Catenulisporales;Catenulisporaceae	0	0	0	8	0	0	0	0	0	0	0	1.51863e-05	0	0	0	0
Bacteria;Firmicutes;Clostridia;Clostridiales;Defluviitaleaceae	0	0	0	4	0	0	0	0	0	0	0	7.59317e-06	0	0	0	0
Bacteria;Cyanobacteria;Cyanobacteria_noname;Chroococcales;Microcystaceae	2	0	0	0	0	0	0	0	3.50416e-06	0	0	0	0	0	0	0
Bacteria;Proteobacteria;Gammaproteobacteria;Enterobacterales;Enterobacteriaceae;Escherichia	3.83283e+07	30670884	7573278	6261541	4.13801e+07	40666206	34835545	27447498	67.1543	58.2337	14.3667	11.8862	63.5561	59.9025	63.0673	52.5292
Bacteria;Proteobacteria;Gammaproteobacteria;Pseudomonadales;Moraxellaceae;Psychrobacter	0	441	181472	2.03119e+07	167434	3921	96436	5330.5	0	0.000837311	0.344256	38.558	0.257163	0.00577575	0.174591	0.0102016
Bacteria;Proteobacteria;Gammaproteobacteria;Enterobacterales;Enterobacteriaceae;Shigella	1558980	1033518	359425	319159	1589760	2477050	1919616	1247722	2.73146	1.9623	0.681836	0.605857	2.44173	3.64877	3.47533	2.3879
Bacteria;Proteobacteria;Gammaproteobacteria;Enterobacterales;Erwiniaceae;Erwinia	389	1623	3429	7003635	58547	1464.5	152	2226.5	0.00068156	0.00308153	0.00650488	13.2949	0.0899229	0.00215725	0.000275185	0.00426109
Bacteria;Proteobacteria;Gammaproteobacteria;Enterobacterales;Erwiniaceae;Pantoea	23631	20464	9175.5	3626437	52606	23619	61746	48815.5	0.0414034	0.0388543	0.0174061	6.88404	0.0807981	0.0347915	0.111787	0.0934235
Bacteria;Proteobacteria;Gammaproteobacteria;Enterobacterales;Enterobacteriaceae;Kluyvera	5	3960.5	2.357e+06	11259.5	1436.5	26.5	220	558226	8.76041e-06	0.00751966	4.47126	0.0213738	0.00220633	3.90353e-05	0.000398295	1.06834
Bacteria;Proteobacteria;Gammaproteobacteria;Enterobacterales;Enterobacteriaceae;Klebsiella	354508	667764	192639	156782	319719	414192	333891	580760	0.621128	1.26786	0.36544	0.297619	0.491059	0.610118	0.604486	1.11146
Bacteria;Firmicutes;Bacilli;Lactobacillales;Carnobacteriaceae;Carnobacterium	608	7357	726	2328138	55	11	353	39	0.00106527	0.0139685	0.00137724	4.41949	8.4475e-05	1.62033e-05	0.000639082	7.46385e-05
Bacteria;Proteobacteria;Gammaproteobacteria;Enterobacterales;Enterobacteriaceae;Salmonella	133261	111824	276238	45183.5	879326	475958	160915	114988	0.233484	0.212316	0.524028	0.0857715	1.35057	0.7011	0.291325	0.220064
Bacteria;Proteobacteria;Gammaproteobacteria;Pseudomonadales;Pseudomonadaceae;Pseudomonas	23683	66600	552328	1.01177e+06	29774.5	38416.5	30129	84818	0.0414945	0.126451	1.04778	1.92064	0.0457309	0.0565887	0.0545464	0.162325
Bacteria;Proteobacteria;Gammaproteobacteria;Pseudomonadales;Moraxellaceae;Acinetobacter	15496.5	707943	7093	834834	34478.5	18214	32679.5	12762	0.0271511	1.34415	0.0134556	1.58476	0.0529559	0.0268298	0.0591639	0.024424
Bacteria;Proteobacteria;Gammaproteobacteria;Enterobacterales;Enterobacteriaceae;Citrobacter	15724	102682	923846	18898.5	38197	21451	16038	358197	0.0275497	0.194958	1.75255	0.0358749	0.0586671	0.031598	0.0290357	0.68552
Bacteria;Proteobacteria;Gammaproteobacteria;Enterobacterales;Enterobacteriaceae;Enterobacter	92295	229989	123938	152176	98699.5	121193	429725	136296	0.161708	0.436672	0.235112	0.288875	0.151594	0.178521	0.777987	0.260843
Bacteria;Proteobacteria;Gammaproteobacteria;Enterobacterales;Hafniaceae;Hafnia	0	236	694124	1395	17	0	645	134368	0	0.000448085	1.31677	0.00264812	2.61105e-05	0	0.00116773	0.257155
Bacteria;Proteobacteria;Gammaproteobacteria;Enterobacterales;Enterobacteriaceae;Raoultella	30359.5	311145	44733	10208.5	15162.5	17893.5	12185	274833	0.0531923	0.59076	0.0848593	0.0193787	0.0232882	0.0263577	0.0220601	0.525978
Bacteria;Firmicutes;Bacilli;Lactobacillales;Streptococcaceae;Lactococcus	240	6785	509429	5	977	2827	214	72163	0.0004205	0.0128824	0.966396	9.49146e-06	0.00150058	0.00416426	0.000387432	0.138106
Bacteria;Proteobacteria;Gammaproteobacteria;Enterobacterales;Hafniaceae;Obesumbacterium	0	6	376996	7	0	0	0	80827	0	1.1392e-05	0.715168	1.3288e-05	0	0	0	0.154687
Bacteria;Proteobacteria;Gammaproteobacteria;Enterobacterales;Enterobacteriaceae;Cronobacter	61159	52619	22460	40700.5	68368	87198	59317	46904	0.107156	0.0999058	0.042607	0.0772615	0.105007	0.128445	0.107389	0.0897652
Bacteria;Firmicutes;Bacilli;Lactobacillales;Aerococcaceae;Aerococcus	28259	303303	0	2426.5	16.5	16.5	0	1	0.0495121	0.575871	0	0.00460621	2.53425e-05	2.4305e-05	0	1.91381e-06
Bacteria;Firmicutes;Bacilli;Lactobacillales;Lactobacillaceae;Lactobacillus	6789.5	131084	1329	2635.5	63076	18521.5	7021	10018	0.0118958	0.248885	0.00252114	0.00500295	0.096879	0.0272827	0.012711	0.0191725
Bacteria;Firmicutes;Bacilli;Lactobacillales;Enterococcaceae;Enterococcus	9285	99966	8890.5	58780.5	3270.5	24872	725	1935	0.0162681	0.189802	0.0168654	0.111583	0.00502319	0.0366372	0.00131256	0.00370322
Bacteria;Proteobacteria;Gammaproteobacteria;Enterobacterales;Enterobacteriaceae;Buttiauxella	0	52	144086	1009.5	2	0	0	28639	0	9.87306e-05	0.273334	0.00191633	3.07182e-06	0	0	0.0548095
Bacteria;Proteobacteria;Gammaproteobacteria;Aeromonadales;Aeromonadaceae;Aeromonas	168	114874	11198.5	4836	360	19	5	869	0.00029435	0.218108	0.0212438	0.00918014	0.000552927	2.79876e-05	9.05215e-06	0.0016631
Bacteria;Proteobacteria;Gammaproteobacteria;Enterobacterales;Enterobacteriaceae;Leclercia	3098	88298.5	15670	3729	14212	2773	2627	4386	0.00542795	0.167649	0.0297263	0.00707873	0.0218283	0.00408471	0.004756	0.00839396
Bacteria;Firmicutes;Bacilli;Lactobacillales;Enterococcaceae;Catellicoccus	4601.5	87647	2893	5560.5	5447	6361	15815	369.5	0.0080622	0.166412	0.00548808	0.0105555	0.0083661	0.00936994	0.0286319	0.000707152
Bacteria;Proteobacteria;Gammaproteobacteria;Enterobacterales;Yersiniaceae;Serratia	1785	4018.5	33970	23141	43918	5082.5	4154	11459.5	0.00312747	0.00762978	0.0644417	0.0439284	0.0674541	0.00748667	0.00752053	0.0219313
Bacteria;Proteobacteria;Alphaproteobacteria;Rhodobacterales;Rhodobacteraceae;Rhodobacter	0	0	0	102933	0	0	0	0	0	0	0	0.195397	0	0	0	0
Bacteria;Actinobacteria;Actinobacteria;Micrococcales;Micrococcaceae;Kocuria	0	2	3290.5	73235	409	235.5	17127.5	37	0	3.79733e-06	0.00624214	0.139021	0.000628187	0.000346899	0.0310081	7.08109e-05
Bacteria;Proteobacteria;Gammaproteobacteria;Enterobacterales;Enterobacteriaceae;Enterobacteriaceae_noname	0	757	65465	8080	668	0	47.5	15774	0	0.00143729	0.124188	0.0153382	0.00102599	0	8.59954e-05	0.0301884
Bacteria;Proteobacteria;Gammaproteobacteria;Oceanospirillales;Halomonadaceae;Zymobacter	13401	11589	4973	2841	14323	17132	12494	10355	0.0234796	0.0220036	0.00943387	0.00539305	0.0219988	0.0252359	0.0226195	0.0198175
Bacteria;Firmicutes;Bacilli;Bacillales;Listeriaceae;Brochothrix	3268	66509	194	5015	427	2771	1010	191	0.0057258	0.126278	0.000368022	0.00951994	0.000655833	0.00408177	0.00182853	0.000365537
Bacteria;Proteobacteria;Gammaproteobacteria;Pseudomonadales;Moraxellaceae;Moraxella	0	0	425	68533	243.5	4	53	14	0	0	0.000806233	0.130096	0.000373994	5.89212e-06	9.59528e-05	2.67933e-05
Bacteria;Proteobacteria;Betaproteobacteria;Burkholderiales;Burkholderiaceae;Burkholderia	9682	6440	5302	3170	12673	10576	13698	6489	0.0169637	0.0122274	0.010058	0.00601759	0.0194646	0.0155788	0.0247993	0.0124187
Bacteria;Actinobacteria;Actinobacteria;Corynebacteriales;Mycobacteriaceae;Mycobacterium	9773	5247	1790	1746	8276	14888	10060	6329	0.0171231	0.00996229	0.00339566	0.00331442	0.0127112	0.0219305	0.0182129	0.0121125
Bacteria;Proteobacteria;Gammaproteobacteria;Vibrionales;Vibrionaceae;Vibrio	6159	5341	6507	14842	6419	6522	5597	3792	0.0107911	0.0101408	0.0123439	0.0281745	0.009859	0.0096071	0.010133	0.00725716
Bacteria;Proteobacteria;Gammaproteobacteria;Enterobacterales;Yersiniaceae;Yersinia	6085	6668.5	13093	3337	8012	2257	4666	8881	0.0106614	0.0126612	0.0248377	0.0063346	0.0123057	0.00332463	0.00844747	0.0169965
Bacteria;Proteobacteria;Gammaproteobacteria;Gammaproteobacteria_noname;Gammaproteobacteria_noname;Gammaproteobacteria_noname	7859	6788	1930	3387	8473.5	10009	9442	6819	0.0137696	0.0128881	0.00366125	0.00642952	0.0130145	0.0147436	0.0170941	0.0130503
Bacteria;Proteobacteria;Gammaproteobacteria;Xanthomonadales;Xanthomonadaceae;Stenotrophomonas	12443	6275	1202	6411	7911	7261	8954	3425	0.0218011	0.0119141	0.00228022	0.01217	0.0121506	0.0106957	0.0162106	0.00655479
Bacteria;Firmicutes;Bacilli;Bacillales;Bacillaceae;Bacillus	531	27874	1316	12455	1041	3435	1035	329	0.000930355	0.0529234	0.00249648	0.0236432	0.00159888	0.00505986	0.00187379	0.000629643
Bacteria;Proteobacteria;Gammaproteobacteria;Enterobacterales;Enterobacteriaceae;Pseudocitrobacter	0	10	28193	37	15	0	0	9342.5	0	1.89866e-05	0.0534826	7.02368e-05	2.30386e-05	0	0	0.0178797
Bacteria;Proteobacteria;Betaproteobacteria;Burkholderiales;Burkholderiaceae;Cupriavidus	9896	4511	1220	2555	5286	6037	6591	3312	0.0173386	0.00856488	0.00231436	0.00485014	0.00811882	0.00889268	0.0119325	0.00633853
Bacteria;Proteobacteria;Betaproteobacteria;Burkholderiales;Alcaligenaceae;Achromobacter	0	27078.5	45	1733.5	23	0	0	145	0	0.051413	8.53658e-05	0.00329069	3.53259e-05	0	0	0.000277502
Bacteria;Firmicutes;Clostridia;Clostridiales;Clostridiaceae;Clostridium	46	12936	309	9773	231	2251	28	2	8.05957e-05	0.0245611	0.000586179	0.018552	0.000354795	0.00331579	5.0692e-05	3.82762e-06
Bacteria;Proteobacteria;Gammaproteobacteria;Enterobacterales;Morganellaceae;Photorhabdus	0	44	0	42	0	28571	0	0	0	8.35412e-05	0	7.97283e-05	0	0.0420859	0	0
Bacteria;Proteobacteria;Gammaproteobacteria;Enterobacterales;Enterobacteriaceae;Cedecea	3665	2883	566	19	3175	5151	4147	484	0.00642138	0.00547385	0.00107371	3.60676e-05	0.00487651	0.00758758	0.00750785	0.000926283
Bacteria;Proteobacteria;Alphaproteobacteria;Rhizobiales;Rhizobiaceae;Rhizobium	422	1573	164	4474	2726	4240	3250	2143	0.000739378	0.0029866	0.000311111	0.00849296	0.00418689	0.00624565	0.0058839	0.00410129
Bacteria;Firmicutes;Bacilli;Lactobacillales;Streptococcaceae;Streptococcus	859	2115	294	620	2643.5	12836	740	608	0.00150504	0.00401568	0.000557724	0.00117694	0.00406018	0.0189078	0.00133972	0.0011636
Bacteria;Proteobacteria;Gammaproteobacteria;Enterobacterales;Pectobacteriaceae;Dickeya	0	81	13594	71	126	0	0	3221	0	0.000153792	0.0257881	0.000134779	0.000193525	0	0	0.00616437
Bacteria;Proteobacteria;Alphaproteobacteria;Rhodobacterales;Rhodobacteraceae;Epibacterium	0	0	53	16438	41	3	42	38	0	0	0.000100542	0.0312041	6.29723e-05	4.41909e-06	7.60381e-05	7.27247e-05
Bacteria;Proteobacteria;Gammaproteobacteria;Enterobacterales;Enterobacteriaceae;Lelliottia	14	2673	7529.5	2661	1417	0	295	1218	2.45291e-05	0.00507513	0.0142836	0.00505136	0.00217638	0	0.000534077	0.00233102
Bacteria;Actinobacteria;Actinobacteria;Micrococcales;Microbacteriaceae;Microbacterium	3650	1476	503	512	2461	2864	2814	1961	0.0063951	0.00280243	0.0009542	0.000971926	0.00377987	0.00421876	0.00509455	0.00375298
Bacteria;Proteobacteria;Betaproteobacteria;Burkholderiales;Burkholderiaceae;Caballeronia	3656	2797	612	0	1653	1682	1034	922	0.00640561	0.00531056	0.00116098	0	0.00253886	0.00247764	0.00187198	0.00176453
Bacteria;Proteobacteria;Gammaproteobacteria;Pasteurellales;Pasteurellaceae;Bisgaardia	0	0	43	11005	14	1	63	13	0	0	8.15718e-05	0.0208907	2.15027e-05	1.47303e-06	0.000114057	2.48795e-05
Bacteria;Bacteroidetes;Cytophagia;Cytophagales;Hymenobacteraceae;Hymenobacter	0	0	0	10943.5	0	0	0	0	0	0	0	0.020774	0	0	0	0
Bacteria;Proteobacteria;Gammaproteobacteria;Enterobacterales;Morganellaceae;Providencia	192	95	199	4841	272	5537	94	132	0.0003364	0.000180373	0.000377507	0.00918963	0.000417767	0.00815617	0.00017018	0.000252623
Bacteria;Firmicutes;Bacilli;Lactobacillales;Carnobacteriaceae;Marinilactibacillus	210	2353	0	6966	0	0	1	0	0.000367937	0.00446756	0	0.0132235	0	0	1.81043e-06	0
Bacteria;Firmicutes;Bacilli;Bacillales;Staphylococcaceae;Staphylococcus	105	1173	33	5433	1312	1450	38	73	0.000183969	0.00222713	6.26016e-05	0.0103134	0.00201511	0.00213589	6.87963e-05	0.000139708
Bacteria;Firmicutes;Bacilli;Lactobacillales;Carnobacteriaceae;Alkalibacterium	482	5203	0	3284	0	1	0	0	0.000844503	0.00987875	0	0.00623399	0	1.47303e-06	0	0
Bacteria;Actinobacteria;Actinobacteria;Micrococcales;Microbacteriaceae;Curtobacterium	841	3016	277	1502	3345	0	14	612	0.0014735	0.00572637	0.000525474	0.00285124	0.00513762	0	2.5346e-05	0.00117125
Bacteria;Firmicutes;Bacilli;Lactobacillales;Carnobacteriaceae;Pisciglobus	0	0	4	8137	0	0	3	0	0	0	7.58807e-06	0.0154464	0	0	5.43129e-06	0
Bacteria;Proteobacteria;Gammaproteobacteria;Vibrionales;Vibrionaceae;Photobacterium	6	71	5495	584	2	0	1	1365	1.05125e-05	0.000134805	0.0104241	0.0011086	3.07182e-06	0	1.81043e-06	0.00261235
Bacteria;Proteobacteria;Gammaproteobacteria;Enterobacterales;Yersiniaceae;Rahnella	0	6280	306	293.5	1	0	355	263.5	0	0.0119236	0.000580488	0.000557149	1.53591e-06	0	0.000642703	0.000504288
Bacteria;Firmicutes;Bacilli;Lactobacillales;Carnobacteriaceae;Jeotgalibaca	104	1024	0	6325	5	5	10	0	0.000182216	0.00194423	0	0.0120067	7.67955e-06	7.36515e-06	1.81043e-05	0
Bacteria;Proteobacteria;Betaproteobacteria;Burkholderiales;Comamonadaceae;Hydrogenophaga	18	287	578	576	540	3474	2058	433	3.15375e-05	0.000544917	0.00109648	0.00109342	0.000829391	0.00511731	0.00372586	0.000828679
Bacteria;Firmicutes;Bacilli;Lactobacillales;Enterococcaceae;Vagococcus	44	1940	715	2851	399	994	100	196	7.70916e-05	0.00368341	0.00135637	0.00541203	0.000612828	0.00146419	0.000181043	0.000375106
Bacteria;Proteobacteria;Betaproteobacteria;Burkholderiales;Alcaligenaceae;Bordetella	92	2065.5	1181	2950	97	0	57	321	0.000161191	0.00392169	0.00224038	0.00559996	0.000148983	0	0.000103194	0.000614332
Bacteria;Proteobacteria;Gammaproteobacteria;Enterobacterales;Enterobacteriaceae;Pluralibacter	382	203	4986	180	0	0	0	915	0.000669295	0.000385429	0.00945854	0.000341693	0	0	0	0.00175113
Bacteria;Proteobacteria;Gammaproteobacteria;Oceanospirillales;Alcanivoracaceae;Alcanivorax	2078	0	0	200	1908	2545	982	0	0.00364082	0	0	0.000379659	0.00293052	0.00374886	0.00177784	0
Bacteria;Proteobacteria;Gammaproteobacteria;Pseudomonadales;Moraxellaceae;Alkanindiges	0	202	0	6185	4	0	16	0	0	0.00038353	0	0.0117409	6.14364e-06	0	2.89669e-05	0
Bacteria;Proteobacteria;Gammaproteobacteria;Enterobacterales;Pectobacteriaceae;Lonsdalea	0	6228	0	0	10	0	58	0	0	0.0118249	0	0	1.53591e-05	0	0.000105005	0
Bacteria;Proteobacteria;Gammaproteobacteria;Enterobacterales;Hafniaceae;Edwardsiella	74	305	4305	221	22	0	0	1210	0.000129654	0.000579093	0.00816667	0.000419523	3.379e-05	0	0	0.00231571
Bacteria;Firmicutes;Bacilli;Lactobacillales;Carnobacteriaceae;Trichococcus	172	3278	0	2326	0	0	0	0	0.000301358	0.00622382	0	0.00441543	0	0	0	0
Bacteria;Proteobacteria;Alphaproteobacteria;Rhodospirillales;Rhodospirillales_noname;Enhydrobacter	0	0	10	5326	22	1	2	9	0	0	1.89702e-05	0.0101103	3.379e-05	1.47303e-06	3.62086e-06	1.72243e-05
Bacteria;Proteobacteria;Gammaproteobacteria;Enterobacterales;Morganellaceae;Proteus	836	8	1912	753.5	510	0	1029	475	0.00146474	1.51893e-05	0.0036271	0.00143036	0.000783314	0	0.00186293	0.000909059
Bacteria;Firmicutes;Bacilli;Lactobacillales;Leuconostocaceae;Weissella	46	1722	449	168.5	749	2363	69	154	8.05957e-05	0.0032695	0.000851761	0.000319862	0.0011504	0.00348077	0.00012492	0.000294726
Bacteria;Proteobacteria;Gammaproteobacteria;Enterobacterales;Pectobacteriaceae;Pectobacterium	0	67	1759	2498	109	5	35	476	0	0.000127211	0.00333686	0.00474193	0.000167414	7.36515e-06	6.3365e-05	0.000910972
Bacteria;Proteobacteria;Gammaproteobacteria;Xanthomonadales;Xanthomonadaceae;Xanthomonas	311	397	411	541	664	1317	213	1201	0.000544897	0.00075377	0.000779675	0.00102698	0.00101984	0.00193998	0.000385622	0.00229848
Bacteria;Firmicutes;Bacilli;Lactobacillales;Carnobacteriaceae;Desemzia	0	0	0	4599	0	0	4	0	0	0	0	0.00873025	0	0	7.24172e-06	0
Bacteria;Firmicutes;Bacilli;Lactobacillales;Aerococcaceae;Globicatella	258	3979	14	0	30	12	220	7	0.000452037	0.00755479	2.65583e-05	0	4.60773e-05	1.76764e-05	0.000398295	1.33967e-05
Bacteria;Bacteria_noname;Bacteria_noname;Bacteria_noname;Bacteria_noname;Bacteria_noname	701	345	11	330	835	1632	1052	5	0.00122821	0.000655039	2.08672e-05	0.000626437	0.00128248	0.00240398	0.00190457	9.56904e-06
Bacteria;Actinobacteria;Actinobacteria;Corynebacteriales;Nocardiaceae;Rhodococcus	500	520	277	71	574	461	1617	271	0.000876041	0.000987306	0.000525474	0.000134779	0.000881612	0.000679067	0.00292746	0.000518642
Bacteria;Proteobacteria;Gammaproteobacteria;Oceanospirillales;Halomonadaceae;Halomonas	0	199	759	2515	0.5	0	12	146.5	0	0.000377834	0.00143984	0.00477421	7.67955e-07	0	2.17252e-05	0.000280373
Bacteria;Proteobacteria;Gammaproteobacteria;Enterobacterales;Budviciaceae;Budvicia	0	0	2918	0	0	0	0	641	0	0	0.0055355	0	0	0	0	0.00122675
Bacteria;Firmicutes;Clostridia;Clostridiales;Lachnospiraceae;Faecalicatena	0	0	0	3287	0	0	0	0	0	0	0	0.00623969	0	0	0	0
Bacteria;Proteobacteria;Betaproteobacteria;Neisseriales;Neisseriaceae;Neisseria	61	133	116	2722	90	47	9	69	0.000106877	0.000252522	0.000220054	0.00516715	0.000138232	6.92324e-05	1.62939e-05	0.000132053
Bacteria;Actinobacteria;Actinobacteria;Corynebacteriales;Mycobacteriaceae;Mycobacteroides	623	174	2	1108	657	975	8	0	0.00109155	0.000330368	3.79404e-06	0.00210331	0.00100909	0.0014362	1.44834e-05	0
Bacteria;Proteobacteria;Gammaproteobacteria;Alteromonadales;Pseudoalteromonadaceae;Pseudoalteromonas	0	14	6	3105	0	0	20	0	0	2.65813e-05	1.13821e-05	0.0058942	0	0	3.62086e-05	0
Bacteria;Gemmatimonadetes;Gemmatimonadetes_noname;Gemmatimonadetes_noname;Gemmatimonadetes_noname;Gemmatimonadetes_noname	0	0	176	109	482	812	1086	661	0	0	0.000333875	0.000206914	0.000740308	0.0011961	0.00196613	0.00126503
Bacteria;Proteobacteria;Gammaproteobacteria;Enterobacterales;Erwiniaceae;Mixta	0	13	0	2474	549	0	0	0	0	2.46826e-05	0	0.00469638	0.000843214	0	0	0
Bacteria;Firmicutes;Bacilli;Lactobacillales;Aerococcaceae;Facklamia	4	71	0	2787	0	0	0	0	7.00833e-06	0.000134805	0	0.00529054	0	0	0	0
Bacteria;Proteobacteria;Alphaproteobacteria;Rhizobiales;Rhizobiaceae;Agrobacterium	677	545	126	25	406	0	626	450	0.00118616	0.00103477	0.000239024	4.74573e-05	0.000623579	0	0.00113333	0.000861213
Bacteria;Actinobacteria;Actinobacteria;Propionibacteriales;Propionibacteriaceae;Cutibacterium	0	0	657	11	0	0	0	1823	0	0	0.00124634	2.08812e-05	0	0	0	0.00348887
Bacteria;Proteobacteria;Gammaproteobacteria;Enterobacterales;Enterobacteriaceae;Enterobacillus	0	0	2125	12	0	0	0	348	0	0	0.00403116	2.27795e-05	0	0	0	0.000666005
Bacteria;Proteobacteria;Gammaproteobacteria;Enterobacterales;Enterobacteriaceae;Atlantibacter	0	2057	36	175	164.5	0	0	0	0	0.00390555	6.82927e-05	0.000332201	0.000252657	0	0	0
Bacteria;Proteobacteria;Gammaproteobacteria;Enterobacterales;Erwiniaceae;Tatumella	0	8	2077	108	57	0	0	106	0	1.51893e-05	0.00394011	0.000205016	8.75468e-05	0	0	0.000202864
Bacteria;Proteobacteria;Alphaproteobacteria;Rhizobiales;Phyllobacteriaceae;Mesorhizobium	0	34	0	2238.5	20	0	4	19	0	6.45546e-05	0	0.00424933	3.07182e-05	0	7.24172e-06	3.63623e-05
Bacteria;Bacteroidetes;Flavobacteriia;Flavobacteriales;Flavobacteriaceae;Elizabethkingia	0	0	0	1969	83	0	55	0	0	0	0	0.00373774	0.00012748	0	9.95736e-05	0
Bacteria;Proteobacteria;Gammaproteobacteria;Enterobacterales;Morganellaceae;Morganella	0	3	1013	264	0	0	0	739	0	5.69599e-06	0.00192168	0.000501149	0	0	0	0.0014143
Bacteria;Proteobacteria;Betaproteobacteria;Burkholderiales;Comamonadaceae;Variovorax	2	84	40	1816	4	0	0	44	3.50416e-06	0.000159488	7.58807e-05	0.0034473	6.14364e-06	0	0	8.42075e-05
Bacteria;Firmicutes;Bacilli;Bacillales;Bacillaceae;Gracilibacillus	0	0	0	1908	0	0	0	0	0	0	0	0.00362194	0	0	0	0
Bacteria;Proteobacteria;Gammaproteobacteria;Enterobacterales;Enterobacterales_noname;Phytobacter	0	0	1535	0	0	0	0	317	0	0	0.00291192	0	0	0	0	0.000606677
Bacteria;Cyanobacteria;Cyanobacteria_noname;Chroococcales;Chroococcaceae;Chondrocystis	0	0	0	1490	10	0	17	0	0	0	0	0.00282846	1.53591e-05	0	3.07773e-05	0
Bacteria;Proteobacteria;Gammaproteobacteria;Enterobacterales;Enterobacteriaceae;Gibbsiella	0	0	1211	0	0	0	0	299	0	0	0.00229729	0	0	0	0	0.000572229
Bacteria;Proteobacteria;Gammaproteobacteria;Cardiobacteriales;Cardiobacteriaceae;Cardiobacterium	0	0	11	1122	13	1	0	305	0	0	2.08672e-05	0.00212988	1.99668e-05	1.47303e-06	0	0.000583711
Bacteria;Proteobacteria;Deltaproteobacteria;Myxococcales;Archangiaceae;Stigmatella	594	294	5	78	581	0	0	19	0.00104074	0.000558207	9.48509e-06	0.000148067	0.000892363	0	0	3.63623e-05
Bacteria;Proteobacteria;Gammaproteobacteria;Enterobacterales;Enterobacteriaceae;Kosakonia	4	66	573	403	37	1	81	231	7.00833e-06	0.000125312	0.00108699	0.000765012	5.68287e-05	1.47303e-06	0.000146645	0.00044209
Bacteria;Proteobacteria;Gammaproteobacteria;Enterobacterales;Yersiniaceae;Nissabacter	0	21	0	1170	0	0	0	171	0	3.9872e-05	0	0.002221	0	0	0	0.000327261
Bacteria;Firmicutes;Clostridia;Clostridiales;Clostridiaceae;Natronincola	0	0	0	1355	0	0	0	0	0	0	0	0.00257219	0	0	0	0
Bacteria;Firmicutes;Bacilli;Bacillales;Planococcaceae;Kurthia	665	0	0	0	0	922	0	0	0.00116513	0	0	0	0	0.00135813	0	0
Bacteria;Firmicutes;Bacilli;Bacillales;Paenibacillaceae;Paenibacillus	8	34	904	43	0	0	7	307	1.40167e-05	6.45546e-05	0.0017149	8.16266e-05	0	0	1.2673e-05	0.000587539
Bacteria;Bacteroidetes;Flavobacteriia;Flavobacteriales;Flavobacteriaceae;Arenibacter	0	0	215	962	132	0	0	0	0	0	0.000407859	0.00182616	0.00020274	0	0	0
Bacteria;Proteobacteria;Deltaproteobacteria;Desulfobacterales;Desulfobulbaceae;Candidatus_Electrothrix	0	0	3	1260	2	0	0	0	0	0	5.69106e-06	0.00239185	3.07182e-06	0	0	0
Bacteria;Proteobacteria;Gammaproteobacteria;Alteromonadales;Alteromonadaceae;Marinobacter	0	0	3	1233	1	0	0	0	0	0	5.69106e-06	0.00234059	1.53591e-06	0	0	0
Archaea;Archaea_noname;Archaea_noname;Archaea_noname;Archaea_noname;Archaea_noname	0	45	0	512	0	793	2	17	0	8.54399e-05	0	0.000971926	0	0.00116811	3.62086e-06	3.25347e-05
Bacteria;Proteobacteria;Gammaproteobacteria;Alteromonadales;Shewanellaceae;Shewanella	0	12	783	118	0	0	0	223	0	2.2784e-05	0.00148537	0.000223999	0	0	0	0.000426779
Bacteria;Proteobacteria;Betaproteobacteria;Burkholderiales;Oxalobacteraceae;Collimonas	0	54	413	532	0	0	0	117	0	0.000102528	0.000783469	0.00100989	0	0	0	0.000223916
Bacteria;Firmicutes;Bacilli;Bacillales;Planococcaceae;Sporosarcina	0	0	83	996	36	0	0	0	0	0	0.000157453	0.0018907	5.52927e-05	0	0	0
Bacteria;Bacteroidetes;Flavobacteriia;Flavobacteriales;Flavobacteriaceae;Aequorivita	0	0	0	1090	0	0	0	0	0	0	0	0.00206914	0	0	0	0
Bacteria;Actinobacteria;Actinobacteria;Streptomycetales;Streptomycetaceae;Streptomyces	0	390	60	482	19	0	38	77	0	0.000740479	0.000113821	0.000914977	2.91823e-05	0	6.87963e-05	0.000147363
Bacteria;Proteobacteria;Gammaproteobacteria;Enterobacterales;Yersiniaceae;Ewingella	0	76	0	35	0	0	958	0	0	0.000144299	0	6.64402e-05	0	0	0.00173439	0
Bacteria;Proteobacteria;Gammaproteobacteria;Enterobacterales;Erwiniaceae;Erwiniaceae_noname	0	0	0	1009	6	0	0	0	0	0	0	0.00191538	9.21546e-06	0	0	0
Bacteria;Proteobacteria;Gammaproteobacteria;Vibrionales;Vibrionaceae;Aliivibrio	0	0	3	936	3	0	4	0	0	0	5.69106e-06	0.0017768	4.60773e-06	0	7.24172e-06	0
Bacteria;Proteobacteria;Gammaproteobacteria;Enterobacterales;Yersiniaceae;Yersiniaceae_noname	0	0	0	938	0	0	0	0	0	0	0	0.0017806	0	0	0	0
Bacteria;Proteobacteria;Betaproteobacteria;Burkholderiales;Oxalobacteraceae;Massilia	0	10	0	891	0	0	30	0	0	1.89866e-05	0	0.00169138	0	0	5.43129e-05	0
Bacteria;Proteobacteria;Betaproteobacteria;Burkholderiales;Comamonadaceae;Delftia	0	101	613	68	0	0	5	129	0	0.000191765	0.00116287	0.000129084	0	0	9.05215e-06	0.000246881
Bacteria;Proteobacteria;Alphaproteobacteria;Rhizobiales;Xanthobacteraceae;Xanthobacteraceae_noname	0	0	0	905	0	0	0	0	0	0	0	0.00171795	0	0	0	0
Bacteria;Proteobacteria;Gammaproteobacteria;Pasteurellales;Pasteurellaceae;Haemophilus	0	0	0	887	2	0	7	0	0	0	0	0.00168379	3.07182e-06	0	1.2673e-05	0
Bacteria;Firmicutes;Clostridia;Clostridiales;Lachnospiraceae;Blautia	0	0	0	0	1067	0	0	0	0	0	0	0	0.00163882	0	0	0
Bacteria;Proteobacteria;Gammaproteobacteria;Alteromonadales;Alteromonadaceae;Alteromonas	0	0	4	846	0	0	0	3	0	0	7.58807e-06	0.00160596	0	0	0	5.74142e-06
Bacteria;Proteobacteria;Betaproteobacteria;Burkholderiales;Comamonadaceae;Acidovorax	0	26	0	773	0	0	0	0	0	4.93653e-05	0	0.00146738	0	0	0	0
Bacteria;Proteobacteria;Gammaproteobacteria;Enterobacterales;Morganellaceae;Xenorhabdus	0	42	8	419	1	0	27	294	0	7.97439e-05	1.51761e-05	0.000795385	1.53591e-06	0	4.88816e-05	0.000562659
Bacteria;Proteobacteria;Alphaproteobacteria;Rhodospirillales;Rhodospirillaceae;Thalassospira	0	0	651	0	0	0	0	136	0	0	0.00123496	0	0	0	0	0.000260278
Bacteria;Bacteroidetes;Flavobacteriia;Flavobacteriales;Flavobacteriaceae;Capnocytophaga	0	0	0	767	0	0	0	0	0	0	0	0.00145599	0	0	0	0
Bacteria;Proteobacteria;Betaproteobacteria;Burkholderiales;Comamonadaceae;Comamonas	0	0	5	727	0	1	0	2	0	0	9.48509e-06	0.00138006	0	1.47303e-06	0	3.82762e-06
Bacteria;Proteobacteria;Betaproteobacteria;Betaproteobacteria_noname;Betaproteobacteria_noname;Candidatus_Accumulibacter	0	257	203	100	79	0	0	78	0	0.000487957	0.000385095	0.000189829	0.000121337	0	0	0.000149277
Bacteria;Firmicutes;Clostridia;Clostridiales;Clostridiaceae;Candidatus_Arthromitus	3	0	8	567	42	30	5	61	5.25624e-06	0	1.51761e-05	0.00107633	6.45082e-05	4.41909e-05	9.05215e-06	0.000116742
Bacteria;Proteobacteria;Gammaproteobacteria;Oceanospirillales;Oceanospirillaceae;Marinomonas	0	0	0	680	0	0	2	5	0	0	0	0.00129084	0	0	3.62086e-06	9.56904e-06
Bacteria;Proteobacteria;Gammaproteobacteria;Alteromonadales;Moritellaceae;Moritella	0	0	0	686	0	0	0	0	0	0	0	0.00130223	0	0	0	0
Bacteria;Bacteroidetes;Flavobacteriia;Flavobacteriales;Flavobacteriaceae;Maribacter	0	0	0	591	32	0	0	9	0	0	0	0.00112189	4.91491e-05	0	0	1.72243e-05
Bacteria;Proteobacteria;Epsilonproteobacteria;Campylobacterales;Campylobacteraceae;Campylobacter	0	22	9	162	140	0	17	297	0	4.17706e-05	1.70732e-05	0.000307523	0.000215027	0	3.07773e-05	0.000568401
Bacteria;Actinobacteria;Actinobacteria;Micrococcales;Micrococcaceae;Rothia	0	0	6	77	48	259	67	215	0	0	1.13821e-05	0.000146169	7.37237e-05	0.000381515	0.000121299	0.000411469
Bacteria;Firmicutes;Bacilli;Lactobacillales;Leuconostocaceae;Leuconostoc	425	28	22	9	47	97	0	32	0.000744635	5.31626e-05	4.17344e-05	1.70846e-05	7.21877e-05	0.000142884	0	6.12418e-05
Bacteria;Proteobacteria;Gammaproteobacteria;Chromatiales;Chromatiaceae;Rheinheimera	0	0	0	590	0	0	0	0	0	0	0	0.00111999	0	0	0	0
Bacteria;Proteobacteria;Betaproteobacteria;Nitrosomonadales;Nitrosomonadaceae;Nitrosomonas	0	0	64	487	11	0	0	16	0	0	0.000121409	0.000924468	1.6895e-05	0	0	3.06209e-05
Bacteria;Cyanobacteria;Cyanobacteria_noname;Chroococcidiopsidales;Chroococcidiopsidaceae;Chroococcidiopsis	0	0	0	0	0	0	0	542	0	0	0	0	0	0	0	0.00103728
Bacteria;Proteobacteria;Epsilonproteobacteria;Campylobacterales;Helicobacteraceae;Helicobacter	0	0	21	0	180	485	0	0	0	0	3.98374e-05	0	0.000276464	0.00071442	0	0
Bacteria;Firmicutes;Bacilli;Lactobacillales;Enterococcaceae;Pilibacter	0	0	0	0	115	373	155	0	0	0	0	0	0.00017663	0.00054944	0.000280617	0
Bacteria;Proteobacteria;Gammaproteobacteria;Enterobacterales;Enterobacteriaceae;Yokenella	8	178	19	8	20	48	27	224	1.40167e-05	0.000337962	3.60434e-05	1.51863e-05	3.07182e-05	7.07054e-05	4.88816e-05	0.000428693
Bacteria;Bacteroidetes;Flavobacteriia;Flavobacteriales;Flavobacteriaceae;Flavobacterium	0	0	0	516	0	0	0	0	0	0	0	0.000979519	0	0	0	0
Bacteria;Firmicutes;Bacilli;Lactobacillales;Enterococcaceae;Tetragenococcus	0	0	0	502	0	0	0	0	0	0	0	0.000952943	0	0	0	0
Bacteria;Actinobacteria;Actinobacteria;Bifidobacteriales;Bifidobacteriaceae;Bifidobacterium	6	369	0	10	17	17	5	63	1.05125e-05	0.000700607	0	1.89829e-05	2.61105e-05	2.50415e-05	9.05215e-06	0.00012057
Bacteria;Proteobacteria;Gammaproteobacteria;Enterobacterales;Enterobacteriaceae;Pseudescherichia	0	37	9	395	18.5	0	16	0	0	7.02506e-05	1.70732e-05	0.000749826	2.84143e-05	0	2.89669e-05	0
Bacteria;Proteobacteria;Alphaproteobacteria;Rhizobiales;Brucellaceae;Brucella	0	0	9	448	0	0	0	4	0	0	1.70732e-05	0.000850435	0	0	0	7.65523e-06
Bacteria;Proteobacteria;Gammaproteobacteria;Cellvibrionales;Cellvibrionaceae;Teredinibacter	0	0	0	454	0	0	0	0	0	0	0	0.000861825	0	0	0	0
Bacteria;Actinobacteria;Actinobacteria;Micrococcales;Micrococcaceae;Arthrobacter	0	0	181	175	0	2	64	35	0	0	0.00034336	0.000332201	0	2.94606e-06	0.000115868	6.69833e-05
Bacteria;Proteobacteria;Gammaproteobacteria;Cardiobacteriales;Cardiobacteriales_noname;Cardiobacteriales_noname	0	0	0	450.5	0	0	3	0	0	0	0	0.000855181	0	0	5.43129e-06	0
Bacteria;Proteobacteria;Gammaproteobacteria;Enterobacterales;Enterobacteriaceae;Mangrovibacter	0	0	149	268	0	0	0	33	0	0	0.000282656	0.000508742	0	0	0	6.31557e-05
Bacteria;Proteobacteria;Alphaproteobacteria;Rhizobiales;Brucellaceae;Ochrobactrum	0	0	0	434	0	0	1	0	0	0	0	0.000823859	0	0	1.81043e-06	0
Bacteria;Proteobacteria;Gammaproteobacteria;Enterobacterales;Enterobacterales_noname;Plesiomonas	0	32	0	0	485	4	0	0	0	6.07573e-05	0	0	0.000744916	5.89212e-06	0	0
Bacteria;Proteobacteria;Gammaproteobacteria;Cellvibrionales;Cellvibrionaceae;Agaribacterium	0	0	0	405	0	0	13	0	0	0	0	0.000768808	0	0	2.35356e-05	0
Bacteria;Proteobacteria;Epsilonproteobacteria;Epsilonproteobacteria_noname;Epsilonproteobacteria_noname;Epsilonproteobacteria_noname	0	0	0	406	0	0	0	0	0	0	0	0.000770707	0	0	0	0
Bacteria;Proteobacteria;Gammaproteobacteria;Enterobacterales;Enterobacteriaceae;Siccibacter	0	0	0	201	0	0	185	0	0	0	0	0.000381557	0	0	0.00033493	0
Bacteria;Firmicutes;Clostridia;Clostridiales;Lachnospiraceae;Oribacterium	0	0	0	364	0	0	0	0	0	0	0	0.000690978	0	0	0	0
Bacteria;Firmicutes;Tissierellia;Tissierellales;Peptoniphilaceae;Anaerococcus	0	5	62	275	16	5	3	0	0	9.49332e-06	0.000117615	0.00052203	2.45746e-05	7.36515e-06	5.43129e-06	0
Bacteria;Firmicutes;Tissierellia;Tissierellia_noname;Tissierellia_noname;Sedimentibacter	4	26	0	324	0	0	0	0	7.00833e-06	4.93653e-05	0	0.000615047	0	0	0	0
Bacteria;Firmicutes;Bacilli;Bacillales;Staphylococcaceae;Macrococcus	0	150	0	0	0	247	0	6	0	0.0002848	0	0	0	0.000363838	0	1.14828e-05
Bacteria;Proteobacteria;Gammaproteobacteria;Enterobacterales;Enterobacteriaceae;Candidatus_Hamiltonella	0	0	276	0	0	0	0	70	0	0	0.000523577	0	0	0	0	0.000133967
Bacteria;Proteobacteria;Gammaproteobacteria;Aeromonadales;Aeromonadaceae;Oceanisphaera	0	0	36	284	31	0	0	0	0	0	6.82927e-05	0.000539115	4.76132e-05	0	0	0
Bacteria;Firmicutes;Bacilli;Bacillales;Bacillaceae;Virgibacillus	7	128	0	197	0	0	0	0	1.22646e-05	0.000243029	0	0.000373964	0	0	0	0
Bacteria;Bacteroidetes;Bacteroidia;Bacteroidales;Bacteroidaceae;Bacteroides	0	9	0	314	2	0	0	0	0	1.7088e-05	0	0.000596064	3.07182e-06	0	0	0
Bacteria;Proteobacteria;Alphaproteobacteria;Rhizobiales;Rhizobiaceae;Sinorhizobium	0	197	37	65	0	0	0	18	0	0.000374037	7.01897e-05	0.000123389	0	0	0	3.44485e-05
Bacteria;Proteobacteria;Gammaproteobacteria;Legionellales;Legionellaceae;Legionella	0	0	0	316	0	0	0	0	0	0	0	0.00059986	0	0	0	0
Bacteria;Proteobacteria;Betaproteobacteria;Burkholderiales;Burkholderiaceae;Pandoraea	0	32	18	255	0	0	0	7	0	6.07573e-05	3.41463e-05	0.000484065	0	0	0	1.33967e-05
Bacteria;Firmicutes;Bacilli;Lactobacillales;Leuconostocaceae;Oenococcus	6	277	0	0	16	3	3	10.5	1.05125e-05	0.00052593	0	0	2.45746e-05	4.41909e-06	5.43129e-06	2.0095e-05
Bacteria;Proteobacteria;Betaproteobacteria;Burkholderiales;Sutterellaceae;Parasutterella	0	0	22	20	0	2	240	36	0	0	4.17344e-05	3.79659e-05	0	2.94606e-06	0.000434503	6.88971e-05
Bacteria;Firmicutes;Clostridia;Clostridiales;Lachnospiraceae;Lachnospiraceae_noname	0	0	0	295	0	0	0	0	0	0	0	0.000559996	0	0	0	0
Bacteria;Firmicutes;Clostridia;Clostridiales;Ruminococcaceae;Ruminococcus	0	248	0	46	0	0	0	0	0	0.000470869	0	8.73215e-05	0	0	0	0
Bacteria;Proteobacteria;Gammaproteobacteria;Pasteurellales;Pasteurellaceae;Chelonobacter	0	0	0	6	15	304	36	0	0	0	0	1.13898e-05	2.30386e-05	0.000447801	6.51755e-05	0
Bacteria;Firmicutes;Bacilli;Bacillales;Bacillaceae;Lentibacillus	0	0	0	288	0	0	0	0	0	0	0	0.000546708	0	0	0	0
Bacteria;Firmicutes;Clostridia;Clostridiales;Peptostreptococcaceae;Clostridioides	0	23	174	24	0	0	0	58	0	4.36693e-05	0.000330081	4.5559e-05	0	0	0	0.000111001
Bacteria;Bacteroidetes;Bacteroidia;Bacteroidales;Rikenellaceae;Alistipes	0	0	0	0	0	0	292	0	0	0	0	0	0	0	0.000528646	0
Bacteria;Proteobacteria;Gammaproteobacteria;Pseudomonadales;Pseudomonadales_noname;Pseudomonadales_noname	0	10	30	191	34	0	2	4	0	1.89866e-05	5.69106e-05	0.000362574	5.22209e-05	0	3.62086e-06	7.65523e-06
Bacteria;Proteobacteria;Gammaproteobacteria;Oceanospirillales;Hahellaceae;Hahella	7	161	0	11	0	0	0	81	1.22646e-05	0.000305685	0	2.08812e-05	0	0	0	0.000155018
Bacteria;Firmicutes;Bacilli;Bacillales;Listeriaceae;Listeria	0	155	0	8	88	25.5	0	0	0	0.000294293	0	1.51863e-05	0.00013516	3.75623e-05	0	0
Bacteria;Cyanobacteria;Cyanobacteria_noname;Synechococcales;Coelosphaeriaceae;Snowella	0	0	0	247	6	0	0	0	0	0	0	0.000468878	9.21546e-06	0	0	0
Bacteria;Proteobacteria;Betaproteobacteria;Burkholderiales;Burkholderiaceae;Ralstonia	0	38	0	194	0	0	0	16	0	7.21493e-05	0	0.000368269	0	0	0	3.06209e-05
Bacteria;Proteobacteria;Gammaproteobacteria;Cardiobacteriales;Cardiobacteriaceae;Suttonella	0	0	21	26	7	3	196	5	0	0	3.98374e-05	4.93556e-05	1.07514e-05	4.41909e-06	0.000354844	9.56904e-06
Bacteria;Proteobacteria;Gammaproteobacteria;Enterobacterales;Enterobacteriaceae;Metakosakonia	0	23	13	38	0	0	166	7	0	4.36693e-05	2.46612e-05	7.21351e-05	0	0	0.000300531	1.33967e-05
Bacteria;Bacteroidetes;Sphingobacteriia;Sphingobacteriales;Sphingobacteriaceae;Sphingobacterium	0	0	0	236	4	0	0	0	0	0	0	0.000447997	6.14364e-06	0	0	0
Bacteria;Nitrospirae;Nitrospira;Nitrospirales;Nitrospiraceae;Candidatus_Magnetoovum	0	21	0	184	0	0	0	29	0	3.9872e-05	0	0.000349286	0	0	0	5.55004e-05
Bacteria;Cyanobacteria;Cyanobacteria_noname;Synechococcales;Merismopediaceae;Aphanocapsa	0	0	0	206	0	0	0	0	0	0	0	0.000391048	0	0	0	0
Bacteria;Actinobacteria;Actinobacteria;Micrococcales;Micrococcaceae;Micrococcus	0	25	17	123	0	2	41	0	0	4.74666e-05	3.22493e-05	0.00023349	0	2.94606e-06	7.42276e-05	0
Bacteria;Proteobacteria;Gammaproteobacteria;Gammaproteobacteria_noname;Gammaproteobacteria_noname;Ignatzschineria	0	0	0	181	3	0	23	0	0	0	0	0.000343591	4.60773e-06	0	4.16399e-05	0
Bacteria;Proteobacteria;Gammaproteobacteria;Thiotrichales;Thiotrichaceae;Thiothrix	0	0	0	202	0	0	0	0	0	0	0	0.000383455	0	0	0	0
Bacteria;Firmicutes;Bacilli;Lactobacillales;Streptococcaceae;Floricoccus	0	0	177	0	0	0	0	24	0	0	0.000335772	0	0	0	0	4.59314e-05
Bacteria;Proteobacteria;Gammaproteobacteria;Oceanospirillales;Oceanospirillales_noname;Oceanospirillales_noname	0	0	0	200	0	0	0	0	0	0	0	0.000379659	0	0	0	0
Bacteria;Proteobacteria;Gammaproteobacteria;Aeromonadales;Aeromonadaceae;Tolumonas	0	5	0	113	0	0	0	78	0	9.49332e-06	0	0.000214507	0	0	0	0.000149277
Bacteria;Proteobacteria;Gammaproteobacteria;Enterobacterales;Enterobacteriaceae;Izhakiella	0	0	165	0	0	0	0	30	0	0	0.000313008	0	0	0	0	5.74142e-05
Bacteria;Proteobacteria;Gammaproteobacteria;Oceanospirillales;Hahellaceae;Sansalvadorimonas	0	0	158	0	0	0	0	33	0	0	0.000299729	0	0	0	0	6.31557e-05
Bacteria;Proteobacteria;Gammaproteobacteria;Enterobacterales;Yersiniaceae;Rouxiella	0	163	15	0	0	0	0	10	0	0.000309482	2.84553e-05	0	0	0	0	1.91381e-05
Bacteria;Proteobacteria;Gammaproteobacteria;Thiotrichales;Thiotrichaceae;Thiotrichaceae_noname	0	0	0	183	0	0	0	0	0	0	0	0.000347388	0	0	0	0
Bacteria;Proteobacteria;Betaproteobacteria;Burkholderiales;Alcaligenaceae;Oligella	0	0	0	107	0	0	75	0	0	0	0	0.000203117	0	0	0.000135782	0
Bacteria;Proteobacteria;Betaproteobacteria;Burkholderiales;Alcaligenaceae;Pusillimonas	0	176	0	0	0	0	0	0	0	0.000334165	0	0	0	0	0	0
Bacteria;Bacteroidetes;Bacteroidia;Bacteroidales;Tannerellaceae;Parabacteroides	0	0	18	18	0	0	135	7	0	0	3.41463e-05	3.41693e-05	0	0	0.000244408	1.33967e-05
Bacteria;Proteobacteria;Gammaproteobacteria;Enterobacterales;Enterobacteriaceae;Biostraticola	0	0	0	169	0	0	0	0	0	0	0	0.000320811	0	0	0	0
Bacteria;Bacteroidetes;Flavobacteriia;Flavobacteriales;Flavobacteriaceae;Chryseobacterium	0	62	0	99	0	0	0	0	0	0.000117717	0	0.000187931	0	0	0	0
Bacteria;Firmicutes;Bacilli;Bacillales;Bacillaceae;Halolactibacillus	0	0	0	161	0	0	0	0	0	0	0	0.000305625	0	0	0	0
Bacteria;Proteobacteria;Betaproteobacteria;Neisseriales;Neisseriaceae;Eikenella	0	0	140	0	0	0	0	19	0	0	0.000265583	0	0	0	0	3.63623e-05
Bacteria;Verrucomicrobia;Verrucomicrobia_noname;Verrucomicrobia_noname;Verrucomicrobia_noname;Verrucomicrobia_noname	0	16	0	118	12	0	0	14	0	3.03786e-05	0	0.000223999	1.84309e-05	0	0	2.67933e-05
Bacteria;Proteobacteria;Gammaproteobacteria;Oceanospirillales;Oceanospirillaceae;Nitrincola	0	157	0	0	0	0	0	0	0	0.00029809	0	0	0	0	0	0
Bacteria;Proteobacteria;Betaproteobacteria;Neisseriales;Neisseriaceae;Alysiella	0	0	0	144	0	0	0	5	0	0	0	0.000273354	0	0	0	9.56904e-06
Bacteria;Proteobacteria;Gammaproteobacteria;Methylococcales;Methylococcales_noname;Methylococcales_noname	0	0	0	145	0	0	0	0	0	0	0	0.000275252	0	0	0	0
Bacteria;Proteobacteria;Betaproteobacteria;Burkholderiales;Burkholderiaceae;Paraburkholderia	0	12	7	8	4	1	96	20	0	2.2784e-05	1.32791e-05	1.51863e-05	6.14364e-06	1.47303e-06	0.000173801	3.82762e-05
Bacteria;Proteobacteria;Epsilonproteobacteria;Campylobacterales;Helicobacteraceae;Sulfurimonas	0	0	4	0	7	165	0	0	0	0	7.58807e-06	0	1.07514e-05	0.00024305	0	0
Bacteria;Cyanobacteria;Cyanobacteria_noname;Nostocales;Nostocaceae;Nostoc	0	0	0	13	114	0	0	29	0	0	0	2.46778e-05	0.000175094	0	0	5.55004e-05
Bacteria;Bacteroidetes;Flavobacteriia;Flavobacteriales;Flavobacteriaceae;Riemerella	0	0	0	130	5	0	0	0	0	0	0	0.000246778	7.67955e-06	0	0	0
Bacteria;Proteobacteria;Gammaproteobacteria;Chromatiales;Chromatiaceae;Thiocapsa	0	23	0	4	0	0	0	104	0	4.36693e-05	0	7.59317e-06	0	0	0	0.000199036
Bacteria;Proteobacteria;Gammaproteobacteria;Enterobacterales;Enterobacteriaceae;Trabulsiella	0	85	14	0	0	0	0	31	0	0.000161386	2.65583e-05	0	0	0	0	5.9328e-05
Bacteria;Proteobacteria;Betaproteobacteria;Burkholderiales;Comamonadaceae;Polaromonas	0	0	0	0	0	0	0	123	0	0	0	0	0	0	0	0.000235398
Bacteria;Firmicutes;Clostridia;Clostridiales;Ruminococcaceae;Flavonifractor	0	113	0	0	0	0	0	0	0	0.000214549	0	0	0	0	0	0
Bacteria;Firmicutes;Clostridia;Clostridiales;Clostridiales_noname;Clostridiales_noname	5	105	0	0	0	0	0	0	8.76041e-06	0.00019936	0	0	0	0	0	0
Bacteria;Proteobacteria;Alphaproteobacteria;Rhodobacterales;Rhodobacteraceae;Rubellimicrobium	0	0	0	0	0	0	0	106.5	0	0	0	0	0	0	0	0.000203821
Bacteria;Proteobacteria;Alphaproteobacteria;Sphingomonadales;Sphingomonadaceae;Novosphingobium	5	55	0	40	8	0	0	0	8.76041e-06	0.000104427	0	7.59317e-05	1.22873e-05	0	0	0
Bacteria;Actinobacteria;Actinobacteria;Micrococcales;Brevibacteriaceae;Brevibacterium	0	0	0	89	0	0	17	0	0	0	0	0.000168948	0	0	3.07773e-05	0
Bacteria;Proteobacteria;Gammaproteobacteria;Cellvibrionales;Cellvibrionaceae;Cellvibrio	0	0	0	105	0	0	0	0	0	0	0	0.000199321	0	0	0	0
Bacteria;Proteobacteria;Betaproteobacteria;Neisseriales;Neisseriaceae;Prolinoborus	0	104	0	0	1	0	0	0	0	0.000197461	0	0	1.53591e-06	0	0	0
Bacteria;Proteobacteria;Gammaproteobacteria;Enterobacterales;Pectobacteriaceae;Sodalis	0	0	0	103	0	0	0	0	0	0	0	0.000195524	0	0	0	0
Bacteria;Firmicutes;Clostridia;Clostridiales;Clostridiaceae;Youngiibacter	0	0	0	99	0	0	0	0	0	0	0	0.000187931	0	0	0	0
Bacteria;Lentisphaerae;Lentisphaerae_noname;Lentisphaerae_noname;Lentisphaerae_noname;Lentisphaerae_noname	5	91	2	0	0	0	0	0	8.76041e-06	0.000172778	3.79404e-06	0	0	0	0	0
Bacteria;Chlamydiae;Chlamydiia;Chlamydiales;Chlamydiaceae;Chlamydia	3	24	1	0	78	3	0	0	5.25624e-06	4.55679e-05	1.89702e-06	0	0.000119801	4.41909e-06	0	0
Bacteria;Proteobacteria;Betaproteobacteria;Rhodocyclales;Zoogloeaceae;Thauera	0	25	0	61	0	0	7	0	0	4.74666e-05	0	0.000115796	0	0	1.2673e-05	0
Bacteria;Proteobacteria;Alphaproteobacteria;Rhodobacterales;Rhodobacteraceae;Paracoccus	1	0	7	24	30	27.5	0	15	1.75208e-06	0	1.32791e-05	4.5559e-05	4.60773e-05	4.05083e-05	0	2.87071e-05
Bacteria;Firmicutes;Bacilli;Lactobacillales;Lactobacillaceae;Pediococcus	0	0	11	0	0	0	0	80	0	0	2.08672e-05	0	0	0	0	0.000153105
Bacteria;Proteobacteria;Gammaproteobacteria;Xanthomonadales;Rhodanobacteraceae;Rhodanobacter	0	23	0	55	7	0	0	0	0	4.36693e-05	0	0.000104406	1.07514e-05	0	0	0
Bacteria;Proteobacteria;Betaproteobacteria;Neisseriales;Chromobacteriaceae;Chromobacterium	0	19	0	63	0	0	0	0	0	3.60746e-05	0	0.000119592	0	0	0	0
Bacteria;Spirochaetes;Spirochaetia;Leptospirales;Leptospiraceae;Leptospira	0	0	0	82	0	0	0	0	0	0	0	0.00015566	0	0	0	0
Bacteria;Candidatus_Sumerlaeota;Candidatus_Sumerlaeota_noname;Candidatus_Sumerlaeota_noname;Candidatus_Sumerlaeota_noname;Candidatus_Sumerlaeota_noname	0	67	0	14	0	0	0	0	0	0.000127211	0	2.65761e-05	0	0	0	0
Bacteria;Cyanobacteria;Cyanobacteria_noname;Cyanobacteria_noname;Cyanobacteria_noname;Cyanobacteria_noname	0	0	0	0	0	0	0	80	0	0	0	0	0	0	0	0.000153105
Bacteria;Firmicutes;Clostridia;Clostridiales;Peptostreptococcaceae;Peptostreptococcus	5	43	0	26	8	0.5	0	0	8.76041e-06	8.16426e-05	0	4.93556e-05	1.22873e-05	7.36515e-07	0	0
Bacteria;Firmicutes;Bacilli;Lactobacillales;Leuconostocaceae;Fructobacillus	0	0	0	0	0	0	0	79	0	0	0	0	0	0	0	0.000151191
Bacteria;Proteobacteria;Gammaproteobacteria;Oceanospirillales;Oceanospirillaceae;Oleibacter	0	0	1	73	0	0	2	0	0	0	1.89702e-06	0.000138575	0	0	3.62086e-06	0
Bacteria;Proteobacteria;Gammaproteobacteria;Enterobacterales;Morganellaceae;Arsenophonus	0	0	0	0	0	0	0	75	0	0	0	0	0	0	0	0.000143536
Bacteria;Proteobacteria;Deltaproteobacteria;Syntrophobacterales;Syntrophaceae;Syntrophus	0	0	75	0	0	0	0	0	0	0	0.000142276	0	0	0	0	0
Bacteria;Proteobacteria;Gammaproteobacteria;Pasteurellales;Pasteurellaceae;Rodentibacter	0	0	0	74	0	0	0	0	0	0	0	0.000140474	0	0	0	0
Bacteria;Actinobacteria;Actinobacteria;Corynebacteriales;Corynebacteriaceae;Corynebacterium	0	0	0	72	0	0	0	0	0	0	0	0.000136677	0	0	0	0
Bacteria;Actinobacteria;Actinobacteria;Micrococcales;Dermabacteraceae;Brachybacterium	0	0	0	51	0	0	22	0	0	0	0	9.68129e-05	0	0	3.98295e-05	0
Bacteria;Proteobacteria;Gammaproteobacteria;Pseudomonadales;Moraxellaceae;Moraxellaceae_noname	0	0	0	71	0	0	0	0	0	0	0	0.000134779	0	0	0	0
Bacteria;Actinobacteria;Actinobacteria;Kineosporiales;Kineosporiaceae;Quadrisphaera	0	0	5	51	0	1	14	0	0	0	9.48509e-06	9.68129e-05	0	1.47303e-06	2.5346e-05	0
Bacteria;Proteobacteria;Gammaproteobacteria;Orbales;Orbaceae;Gilliamella	0	0	0	31	0	0	0	36	0	0	0	5.88471e-05	0	0	0	6.88971e-05
Bacteria;Bacteroidetes;Cytophagia;Cytophagales;Hymenobacteraceae;Pontibacter	0	0	0	67	0	0	0	0	0	0	0	0.000127186	0	0	0	0
Bacteria;Proteobacteria;Betaproteobacteria;Burkholderiales;Burkholderiales_noname;Methylibium	0	66	0	0	0	0	0	0	0	0.000125312	0	0	0	0	0	0
Bacteria;Proteobacteria;Alphaproteobacteria;Rhizobiales;Beijerinckiaceae;Beijerinckiaceae_noname	0	37	0	0	35	0	0	0	0	7.02506e-05	0	0	5.37568e-05	0	0	0
Bacteria;Firmicutes;Bacilli;Lactobacillales;Carnobacteriaceae;Atopostipes	0	0	0	64	0	0	0	0	0	0	0	0.000121491	0	0	0	0
Bacteria;Proteobacteria;Alphaproteobacteria;Rhodospirillales;Rhodospirillaceae;Azospirillum	0	0	14	50	0	0	0	0	0	0	2.65583e-05	9.49146e-05	0	0	0	0
Bacteria;Proteobacteria;Alphaproteobacteria;Alphaproteobacteria_noname;Alphaproteobacteria_noname;Alphaproteobacteria_noname	0	31	0	0	0	0	0	32	0	5.88586e-05	0	0	0	0	0	6.12418e-05
Bacteria;Proteobacteria;Alphaproteobacteria;Rhodobacterales;Rhodobacteraceae;Salipiger	0	33	0	11	0	0	0	19	0	6.26559e-05	0	2.08812e-05	0	0	0	3.63623e-05
Bacteria;Proteobacteria;Gammaproteobacteria;Thiotrichales;Thiotrichaceae;Leucothrix	0	0	0	63	0	0	0	0	0	0	0	0.000119592	0	0	0	0
Bacteria;Proteobacteria;Betaproteobacteria;Burkholderiales;Burkholderiales_noname;Aquabacterium	0	62	0	0	0	0	0	0	0	0.000117717	0	0	0	0	0	0
Bacteria;Candidatus_Microgenomates;Candidatus_Microgenomates_noname;Candidatus_Microgenomates_noname;Candidatus_Microgenomates_noname;Candidatus_Microgenomates_noname	0	62	0	0	0	0	0	0	0	0.000117717	0	0	0	0	0	0
Bacteria;Proteobacteria;Alphaproteobacteria;Rhizobiales;Methylobacteriaceae;Methylobacterium	0	18	0	44	0	0	0	0	0	3.4176e-05	0	8.35249e-05	0	0	0	0
Bacteria;Actinobacteria;Actinobacteria;Propionibacteriales;Nocardioidaceae;Nocardioides	0	0	0	50	0	0	11	0	0	0	0	9.49146e-05	0	0	1.99147e-05	0
Bacteria;Proteobacteria;Gammaproteobacteria;Chromatiales;Ectothiorhodospiraceae;Ectothiorhodospira	0	0	0	59	0	0	0	0	0	0	0	0.000111999	0	0	0	0
Bacteria;Actinobacteria;Actinobacteria;Micrococcales;Micrococcaceae;Nesterenkonia	0	0	0	47	0	0	12	0	0	0	0	8.92197e-05	0	0	2.17252e-05	0
Bacteria;Acidobacteria;Acidobacteria_noname;Acidobacteria_noname;Acidobacteria_noname;Acidobacteria_noname	0	36	0	16	0	0	0	6	0	6.83519e-05	0	3.03727e-05	0	0	0	1.14828e-05
Bacteria;Proteobacteria;Gammaproteobacteria;Methylococcales;Methylococcaceae;Methylomonas	0	0	0	58	0	0	0	0	0	0	0	0.000110101	0	0	0	0
Bacteria;Proteobacteria;Alphaproteobacteria;Rhodospirillales;Acetobacteraceae;Komagataeibacter	0	0	16	38	1	0	0	0	0	0	3.03523e-05	7.21351e-05	1.53591e-06	0	0	0
Bacteria;Actinobacteria;Actinobacteria;Micrococcales;Microbacteriaceae;Leucobacter	0	0	0	26	0	0	30	0	0	0	0	4.93556e-05	0	0	5.43129e-05	0
Bacteria;Proteobacteria;Gammaproteobacteria;Pasteurellales;Pasteurellaceae;Gallibacterium	0	0	0	50	0	0	0	2	0	0	0	9.49146e-05	0	0	0	3.82762e-06
Bacteria;Actinobacteria;Actinobacteria;Micrococcales;Microbacteriaceae;Leifsonia	0	0	8	43	0	0	0	0	0	0	1.51761e-05	8.16266e-05	0	0	0	0
Bacteria;Balneolaeota;Balneolia;Balneolales;Balneolaceae;Aliifodinibius	0	0	0	50	0	0	0	0	0	0	0	9.49146e-05	0	0	0	0
Bacteria;Proteobacteria;Betaproteobacteria;Burkholderiales;Comamonadaceae;Alicycliphilus	0	24	0	24	0	0	0	0	0	4.55679e-05	0	4.5559e-05	0	0	0	0
Bacteria;Proteobacteria;Alphaproteobacteria;Rhizobiales;Rhodobiaceae;Rhodobiaceae_noname	0	0	48	0	0	0	0	0	0	0	9.10569e-05	0	0	0	0	0
Bacteria;Proteobacteria;Betaproteobacteria;Burkholderiales;Burkholderiales_noname;Thiomonas	0	13	0	0	43	0	0	0	0	2.46826e-05	0	0	6.60441e-05	0	0	0
Bacteria;Actinobacteria;Actinobacteria;Micrococcales;Cellulomonadaceae;Cellulomonas	19	0	0	0	36	0	0	0	3.32895e-05	0	0	0	5.52927e-05	0	0	0
Bacteria;Chloroflexi;Anaerolineae;Anaerolineales;Anaerolineaceae;Levilinea	0	0	0	46	0	0	0	0	0	0	0	8.73215e-05	0	0	0	0
Bacteria;Firmicutes;Bacilli;Lactobacillales;Carnobacteriaceae;Isobaculum	0	0	0	45	0	0	0	0	0	0	0	8.54232e-05	0	0	0	0
Bacteria;Proteobacteria;Betaproteobacteria;Burkholderiales;Oxalobacteraceae;Janthinobacterium	0	18	0	17	0	0	0	9	0	3.4176e-05	0	3.2271e-05	0	0	0	1.72243e-05
Bacteria;Firmicutes;Bacilli;Bacillales;Planococcaceae;Jeotgalibacillus	0	0	0	44	0	0	0	0	0	0	0	8.35249e-05	0	0	0	0
Bacteria;Proteobacteria;Gammaproteobacteria;Enterobacterales;Yersiniaceae;Chania	0	10	0	0	40	0	0	0	0	1.89866e-05	0	0	6.14364e-05	0	0	0
Bacteria;Proteobacteria;Alphaproteobacteria;Rhodobacterales;Rhodobacteraceae;Maritimibacter	0	0	0	35	0	0	0	7	0	0	0	6.64402e-05	0	0	0	1.33967e-05
Bacteria;Bacteroidetes;Bacteroidetes_noname;Bacteroidetes_noname;Bacteroidetes_noname;Bacteroidetes_noname	0	0	1	41	0	0	0	0	0	0	1.89702e-06	7.783e-05	0	0	0	0
Bacteria;Proteobacteria;Alphaproteobacteria;Rhizobiales;Methylocystaceae;Methylocystaceae_noname	0	0	0	41	0	0	1	0	0	0	0	7.783e-05	0	0	1.81043e-06	0
Bacteria;Bacteroidetes;Bacteroidia;Bacteroidales;Muribaculaceae;Muribaculaceae_noname	0	0	0	41	0	0	0	0	0	0	0	7.783e-05	0	0	0	0
Bacteria;Proteobacteria;Alphaproteobacteria;Rickettsiales;Rickettsiales_noname;Rickettsiales_noname	0	0	0	40	0	0	1	0	0	0	0	7.59317e-05	0	0	1.81043e-06	0
Bacteria;Actinobacteria;Actinobacteria;Micrococcales;Micrococcaceae;Citricoccus	0	0	0	38	0	0	3	0	0	0	0	7.21351e-05	0	0	5.43129e-06	0
Bacteria;Actinobacteria;Actinobacteria;Corynebacteriales;Mycobacteriaceae;Mycolicibacterium	0	0	14	21	0	0	0	5	0	0	2.65583e-05	3.98641e-05	0	0	0	9.56904e-06
Bacteria;Proteobacteria;Betaproteobacteria;Burkholderiales;Oxalobacteraceae;Herbaspirillum	0	40	0	0	0	0	0	0	0	7.59466e-05	0	0	0	0	0	0
Bacteria;Proteobacteria;Betaproteobacteria;Burkholderiales;Burkholderiales_noname;Paucibacter	0	0	0	40	0	0	0	0	0	0	0	7.59317e-05	0	0	0	0
Bacteria;Firmicutes;Bacilli;Bacillales;Bacillaceae;Salimicrobium	0	0	0	40	0	0	0	0	0	0	0	7.59317e-05	0	0	0	0
Bacteria;Proteobacteria;Gammaproteobacteria;Pasteurellales;Pasteurellaceae;Pasteurella	0	0	0	36	0	0	2	0	0	0	0	6.83385e-05	0	0	3.62086e-06	0
Bacteria;Proteobacteria;Gammaproteobacteria;Pasteurellales;Pasteurellaceae;Volucribacter	0	0	0	37	0	0	0	0	0	0	0	7.02368e-05	0	0	0	0
Bacteria;Actinobacteria;Actinobacteria;Micrococcales;Micrococcaceae;Tersicoccus	0	0	0	37	0	0	0	0	0	0	0	7.02368e-05	0	0	0	0
Bacteria;Fusobacteria;Fusobacteriia;Fusobacteriales;Leptotrichiaceae;Leptotrichia	40	0	0	0	0	0	0	0	7.00833e-05	0	0	0	0	0	0	0
Bacteria;Firmicutes;Clostridia;Clostridiales;Lachnospiraceae;Anaerocolumna	0	0	0	36	0	0	0	0	0	0	0	6.83385e-05	0	0	0	0
Bacteria;Firmicutes;Clostridia;Clostridiales;Peptococcaceae;Pelotomaculum	0	0	0	36	0	0	0	0	0	0	0	6.83385e-05	0	0	0	0
Bacteria;Cyanobacteria;Cyanobacteria_noname;Synechococcales;Leptolyngbyaceae;Leptolyngbya	0	0	0	0	0	0	0	35	0	0	0	0	0	0	0	6.69833e-05
Bacteria;Proteobacteria;Deltaproteobacteria;Desulfobacterales;Desulfobacteraceae;Desulfobacteraceae_noname	0	0	0	33	1	0	0	0	0	0	0	6.26437e-05	1.53591e-06	0	0	0
Bacteria;Actinobacteria;Actinobacteria;Propionibacteriales;Nocardioidaceae;Friedmanniella	0	0	0	28	0	0	6	0	0	0	0	5.31522e-05	0	0	1.08626e-05	0
Bacteria;Bacteroidetes;Cytophagia;Cytophagales;Cyclobacteriaceae;Cecembia	4	28	0	0	0	0	0	2	7.00833e-06	5.31626e-05	0	0	0	0	0	3.82762e-06
Bacteria;Candidatus_Omnitrophica;Candidatus_Omnitrophica_noname;Candidatus_Omnitrophica_noname;Candidatus_Omnitrophica_noname;Candidatus_Omnitrophica_noname	0	0	0	0	41	0	0	0	0	0	0	0	6.29723e-05	0	0	0
Bacteria;Proteobacteria;Betaproteobacteria;Betaproteobacteria_noname;Betaproteobacteria_noname;Betaproteobacteria_noname	0	33	0	0	0	0	0	0	0	6.26559e-05	0	0	0	0	0	0
Bacteria;Actinobacteria;Actinobacteria;Propionibacteriales;Nocardioidaceae;Aeromicrobium	0	0	0	33	0	0	0	0	0	0	0	6.26437e-05	0	0	0	0
Bacteria;Planctomycetes;Planctomycetia;Candidatus_Brocadiales;Candidatus_Brocadiaceae;Candidatus_Brocadia	0	0	0	33	0	0	0	0	0	0	0	6.26437e-05	0	0	0	0
Bacteria;Actinobacteria;Actinobacteria;Micrococcales;Dermatophilaceae;Austwickia	0	0	0	27	0	0	6	0	0	0	0	5.12539e-05	0	0	1.08626e-05	0
Bacteria;Proteobacteria;Alphaproteobacteria;Rhizobiales;Rhizobiaceae;Ensifer	0	0	0	32	0	0	0	0	0	0	0	6.07454e-05	0	0	0	0
Bacteria;Bacteroidetes;Cytophagia;Cytophagales;Flammeovirgaceae;Cesiribacter	0	0	0	31	0	0	0	0	0	0	0	5.88471e-05	0	0	0	0
Bacteria;Proteobacteria;Gammaproteobacteria;Xanthomonadales;Xanthomonadaceae;Luteimonas	0	0	0	30	0	0	0	0	0	0	0	5.69488e-05	0	0	0	0
Bacteria;Proteobacteria;Alphaproteobacteria;Caulobacterales;Caulobacteraceae;Brevundimonas	0	0	0	27	3	0	0	0	0	0	0	5.12539e-05	4.60773e-06	0	0	0
Bacteria;Firmicutes;Negativicutes;Veillonellales;Veillonellaceae;Megasphaera	0	0	0	0	0	0	0	29	0	0	0	0	0	0	0	5.55004e-05
Bacteria;Actinobacteria;Actinobacteria;Micrococcales;Intrasporangiaceae;Kribbia	0	0	0	29	0	0	0	0	0	0	0	5.50505e-05	0	0	0	0
Bacteria;Actinobacteria;Actinobacteria;Pseudonocardiales;Pseudonocardiaceae;Actinokineospora	0	0	0	13	0	0	16	0	0	0	0	2.46778e-05	0	0	2.89669e-05	0
Bacteria;Firmicutes;Bacilli;Bacillales;Bacillaceae;Marinococcus	0	0	0	28	0	0	0	0	0	0	0	5.31522e-05	0	0	0	0
Bacteria;Proteobacteria;Alphaproteobacteria;Rhodobacterales;Rhodobacteraceae;Rhodobacteraceae_noname	0	0	0	28	0	0	0	0	0	0	0	5.31522e-05	0	0	0	0
Bacteria;Actinobacteria;Actinobacteria;Micrococcales;Microbacteriaceae;Mycetocola	0	0	0	27	0	0	0	0	0	0	0	5.12539e-05	0	0	0	0
Bacteria;Firmicutes;Firmicutes_noname;Firmicutes_noname;Firmicutes_noname;Firmicutes_noname	0	10	0	16	0	0	0	0	0	1.89866e-05	0	3.03727e-05	0	0	0	0
Bacteria;Bacteroidetes;Bacteroidia;Bacteroidales;Prevotellaceae;Prevotella	0	0	0	26	0	0	0	0	0	0	0	4.93556e-05	0	0	0	0
Bacteria;Proteobacteria;Alphaproteobacteria;Rhodobacterales;Rhodobacteraceae;Roseovarius	0	14	0	0	14	0	0	0	0	2.65813e-05	0	0	2.15027e-05	0	0	0
Bacteria;Actinobacteria;Actinobacteria;Actinomycetales;Actinomycetaceae;Actinomyces	0	25	0	0	0	0	0	0	0	4.74666e-05	0	0	0	0	0	0
Bacteria;Acidobacteria;Solibacteres;Solibacterales;Solibacteraceae;Candidatus_Sulfopaludibacter	0	0	0	24	1	0	0	0	0	0	0	4.5559e-05	1.53591e-06	0	0	0
Bacteria;Proteobacteria;Deltaproteobacteria;Deltaproteobacteria_noname;Deltaproteobacteria_noname;Deltaproteobacteria_noname	0	0	0	10	0	0	0	14	0	0	0	1.89829e-05	0	0	0	2.67933e-05
Bacteria;Cyanobacteria;Cyanobacteria_noname;Nostocales;Aphanizomenonaceae;Nodularia	0	24	0	0	0	0	0	0	0	4.55679e-05	0	0	0	0	0	0
Bacteria;Actinobacteria;Actinobacteria;Micromonosporales;Micromonosporaceae;Verrucosispora	0	0	24	0	0	0	0	0	0	0	4.55284e-05	0	0	0	0	0
Bacteria;Cyanobacteria;Cyanobacteria_noname;Synechococcales;Leptolyngbyaceae;Phormidesmis	0	0	0	0	29	0	0	0	0	0	0	0	4.45414e-05	0	0	0
Bacteria;Actinobacteria;Actinobacteria;Pseudonocardiales;Pseudonocardiaceae;Kutzneria	0	0	0	12	0	0	12	0	0	0	0	2.27795e-05	0	0	2.17252e-05	0
Bacteria;Proteobacteria;Alphaproteobacteria;Sphingomonadales;Sphingomonadaceae;Sphingomonas	0	0	0	17	0	0	0	6	0	0	0	3.2271e-05	0	0	0	1.14828e-05
Bacteria;Proteobacteria;Alphaproteobacteria;Rhodospirillales;Acetobacteraceae;Acetobacter	0	22	0	0	0	0	0	0	0	4.17706e-05	0	0	0	0	0	0
Bacteria;Actinobacteria;Actinobacteria;Micrococcales;Microbacteriaceae;Cryobacterium	0	0	0	22	0	0	0	0	0	0	0	4.17624e-05	0	0	0	0
Bacteria;Proteobacteria;Gammaproteobacteria;Oceanospirillales;Oceanospirillaceae;Marinobacterium	0	0	0	22	0	0	0	0	0	0	0	4.17624e-05	0	0	0	0
Bacteria;Actinobacteria;Actinobacteria;Micrococcales;Micrococcaceae;Pseudarthrobacter	0	0	0	22	0	0	0	0	0	0	0	4.17624e-05	0	0	0	0
Bacteria;Proteobacteria;Alphaproteobacteria;Rhizobiales;Rhizobiales_noname;Rhizobiales_noname	0	0	0	22	0	0	0	0	0	0	0	4.17624e-05	0	0	0	0
Bacteria;Actinobacteria;Actinobacteria;Micrococcales;Micrococcaceae;Enteractinococcus	0	0	0	0	0	0	23	0	0	0	0	0	0	0	4.16399e-05	0
Bacteria;Nitrospirae;Nitrospira;Nitrospirales;Nitrospiraceae;Nitrospira	0	0	0	7	18	0	0	0	0	0	0	1.3288e-05	2.76464e-05	0	0	0
Bacteria;Proteobacteria;Betaproteobacteria;Neisseriales;Chromobacteriaceae;Laribacter	0	0	0	0	0	0	0	21	0	0	0	0	0	0	0	4.019e-05
Bacteria;Firmicutes;Negativicutes;Veillonellales;Veillonellaceae;Lucifera	0	0	0	0	0	0	0	21	0	0	0	0	0	0	0	4.019e-05
Bacteria;Proteobacteria;Alphaproteobacteria;Rhizobiales;Aurantimonadaceae;Mangrovicella	0	0	0	21	0	0	0	0	0	0	0	3.98641e-05	0	0	0	0
Bacteria;Proteobacteria;Gammaproteobacteria;Thiotrichales;Thiolinaceae;Thiolinea	0	0	0	21	0	0	0	0	0	0	0	3.98641e-05	0	0	0	0
Bacteria;Spirochaetes;Spirochaetes_noname;Spirochaetes_noname;Spirochaetes_noname;Spirochaetes_noname	0	0	0	12	0	0	0	8	0	0	0	2.27795e-05	0	0	0	1.53105e-05
Bacteria;Proteobacteria;Betaproteobacteria;Neisseriales;Chromobacteriaceae;Jeongeupia	0	20	0	0	0	0	0	0	0	3.79733e-05	0	0	0	0	0	0
Bacteria;Firmicutes;Erysipelotrichia;Erysipelotrichales;Erysipelotrichaceae;Catenibacterium	0	0	0	20	0	0	0	0	0	0	0	3.79659e-05	0	0	0	0
Bacteria;Proteobacteria;Betaproteobacteria;Burkholderiales;Alcaligenaceae;Parvibium	0	0	0	20	0	0	0	0	0	0	0	3.79659e-05	0	0	0	0
Bacteria;Actinobacteria;Actinobacteria;Micrococcales;Microbacteriaceae;Clavibacter	0	0	0	18	0	0	0	1	0	0	0	3.41693e-05	0	0	0	1.91381e-06
Bacteria;Actinobacteria;Coriobacteriia;Eggerthellales;Eggerthellaceae;Gordonibacter	0	19	0	0	0	0	0	0	0	3.60746e-05	0	0	0	0	0	0
Bacteria;Proteobacteria;Betaproteobacteria;Burkholderiales;Burkholderiales_noname;Tepidimonas	0	19	0	0	0	0	0	0	0	3.60746e-05	0	0	0	0	0	0
Bacteria;Proteobacteria;Gammaproteobacteria;Aeromonadales;Aeromonadaceae;Zobellella	0	19	0	0	0	0	0	0	0	3.60746e-05	0	0	0	0	0	0
Bacteria;Actinobacteria;Actinobacteria;Micrococcales;Promicromonosporaceae;Promicromonospora	0	11	0	8	0	0	0	0	0	2.08853e-05	0	1.51863e-05	0	0	0	0
Bacteria;Actinobacteria;Actinobacteria;Micromonosporales;Micromonosporaceae;Micromonospora	0	0	0	19	0	0	0	0	0	0	0	3.60676e-05	0	0	0	0
Bacteria;Proteobacteria;Alphaproteobacteria;Rhodobacterales;Rhodobacteraceae;Thioclava	0	0	0	19	0	0	0	0	0	0	0	3.60676e-05	0	0	0	0
Bacteria;Proteobacteria;Gammaproteobacteria;Enterobacterales;Enterobacteriaceae;Franconibacter	0	0	0	12	0	0	0	6	0	0	0	2.27795e-05	0	0	0	1.14828e-05
Bacteria;Proteobacteria;Alphaproteobacteria;Caulobacterales;Caulobacteraceae;Caulobacter	0	0	0	17	0	0	0	1	0	0	0	3.2271e-05	0	0	0	1.91381e-06
Bacteria;Proteobacteria;Betaproteobacteria;Burkholderiales;Alcaligenaceae;Alcaligenes	0	0	0	18	0	0	0	0	0	0	0	3.41693e-05	0	0	0	0
Bacteria;Proteobacteria;Alphaproteobacteria;Rhizobiales;Aurantimonadaceae;Aureimonas	0	0	0	18	0	0	0	0	0	0	0	3.41693e-05	0	0	0	0
Bacteria;Acidobacteria;Holophagae;Holophagae_noname;Holophagae_noname;Holophagae_noname	0	0	0	18	0	0	0	0	0	0	0	3.41693e-05	0	0	0	0
Bacteria;Actinobacteria;Actinobacteria;Propionibacteriales;Nocardioidaceae;Pimelobacter	0	0	0	18	0	0	0	0	0	0	0	3.41693e-05	0	0	0	0
Bacteria;Proteobacteria;Gammaproteobacteria;Xanthomonadales;Xanthomonadaceae;Pseudoxanthomonas	0	0	0	18	0	0	0	0	0	0	0	3.41693e-05	0	0	0	0
Bacteria;Proteobacteria;Betaproteobacteria;Burkholderiales;Oxalobacteraceae;Duganella	8	10	0	0	0	0	0	0	1.40167e-05	1.89866e-05	0	0	0	0	0	0
Bacteria;Proteobacteria;Gammaproteobacteria;Cellvibrionales;Halieaceae;Pseudohaliea	0	0	0	0	0	0	0	17	0	0	0	0	0	0	0	3.25347e-05
Bacteria;Proteobacteria;Deltaproteobacteria;Myxococcales;Archangiaceae;Archangium	0	17	0	0	0	0	0	0	0	3.22773e-05	0	0	0	0	0	0
Bacteria;Proteobacteria;Alphaproteobacteria;Rhizobiales;Aurantimonadaceae;Aurantimonas	0	0	0	17	0	0	0	0	0	0	0	3.2271e-05	0	0	0	0
Bacteria;Actinobacteria;Actinobacteria;Micrococcales;Promicromonosporaceae;Cellulosimicrobium	0	0	0	17	0	0	0	0	0	0	0	3.2271e-05	0	0	0	0
Bacteria;Proteobacteria;Alphaproteobacteria;Rhizobiales;Hyphomicrobiaceae;Devosia	0	0	0	17	0	0	0	0	0	0	0	3.2271e-05	0	0	0	0
Bacteria;Bacteroidetes;Flavobacteriia;Flavobacteriales;Flavobacteriaceae;Empedobacter	0	0	0	17	0	0	0	0	0	0	0	3.2271e-05	0	0	0	0
Bacteria;Proteobacteria;Alphaproteobacteria;Rhodospirillales;Rhodospirillaceae;Nitrospirillum	0	0	0	17	0	0	0	0	0	0	0	3.2271e-05	0	0	0	0
Bacteria;Proteobacteria;Gammaproteobacteria;Pseudomonadales;Pseudomonadaceae;Oblitimonas	0	0	0	17	0	0	0	0	0	0	0	3.2271e-05	0	0	0	0
Bacteria;Proteobacteria;Betaproteobacteria;Burkholderiales;Oxalobacteraceae;Oxalobacteraceae_noname	0	0	0	17	0	0	0	0	0	0	0	3.2271e-05	0	0	0	0
Bacteria;Firmicutes;Bacilli;Bacillales;Bacillales_noname;Exiguobacterium	0	0	0	0	21	0	0	0	0	0	0	0	3.22541e-05	0	0	0
Bacteria;Proteobacteria;Betaproteobacteria;Rhodocyclales;Rhodocyclales_noname;Rhodocyclales_noname	0	16	0	0	0	0	0	0	0	3.03786e-05	0	0	0	0	0	0
Bacteria;Proteobacteria;Alphaproteobacteria;Rhizobiales;Bradyrhizobiaceae;Bradyrhizobium	0	0	0	16	0	0	0	0	0	0	0	3.03727e-05	0	0	0	0
Bacteria;Proteobacteria;Gammaproteobacteria;Chromatiales;Ectothiorhodospiraceae;Ectothiorhodospiraceae_noname	0	0	0	16	0	0	0	0	0	0	0	3.03727e-05	0	0	0	0
Bacteria;Nitrospirae;Nitrospira;Nitrospirales;Nitrospiraceae;Candidatus_Magnetobacterium	0	0	16	0	0	0	0	0	0	0	3.03523e-05	0	0	0	0	0
Bacteria;Actinobacteria;Coriobacteriia;Coriobacteriales;Coriobacteriaceae;Collinsella	0.5	7	0	0	10	0	0	0	8.76041e-07	1.32907e-05	0	0	1.53591e-05	0	0	0
Bacteria;Firmicutes;Clostridia;Thermoanaerobacterales;Thermoanaerobacteraceae;Moorella	0	0	0	0	0	0	0	15	0	0	0	0	0	0	0	2.87071e-05
Bacteria;Proteobacteria;Acidithiobacillia;Acidithiobacillales;Acidithiobacillaceae;Acidithiobacillus	0	15	0	0	0	0	0	0	0	2.848e-05	0	0	0	0	0	0
Bacteria;Proteobacteria;Alphaproteobacteria;Sphingomonadales;Sphingomonadaceae;Sphingopyxis	0	15	0	0	0	0	0	0	0	2.848e-05	0	0	0	0	0	0
Bacteria;Proteobacteria;Gammaproteobacteria;Xanthomonadales;Xanthomonadaceae;Lysobacter	0	0	0	15	0	0	0	0	0	0	0	2.84744e-05	0	0	0	0
Archaea;Euryarchaeota;Methanomicrobia;Methanosarcinales;Methanosaetaceae;Methanothrix	0	0	0	15	0	0	0	0	0	0	0	2.84744e-05	0	0	0	0
Bacteria;Proteobacteria;Deltaproteobacteria;Syntrophobacterales;Syntrophaceae;Syntrophaceae_noname	0	0	0	15	0	0	0	0	0	0	0	2.84744e-05	0	0	0	0
Bacteria;Chloroflexi;Chloroflexi_noname;Chloroflexi_noname;Chloroflexi_noname;Chloroflexi_noname	0	14	0	0	0	0	0	0	0	2.65813e-05	0	0	0	0	0	0
Bacteria;Proteobacteria;Alphaproteobacteria;Rhizobiales;Rhizobiaceae;Kaistia	0	14	0	0	0	0	0	0	0	2.65813e-05	0	0	0	0	0	0
Bacteria;Bacteroidetes;Bacteroidia;Bacteroidales;Bacteroidales_noname;Bacteroidales_noname	0	0	0	14	0	0	0	0	0	0	0	2.65761e-05	0	0	0	0
Bacteria;Proteobacteria;Alphaproteobacteria;Rhizobiales;Beijerinckiaceae;Pseudochelatococcus	0	0	0	14	0	0	0	0	0	0	0	2.65761e-05	0	0	0	0
Bacteria;Bacteroidetes;Cytophagia;Cytophagales;Hymenobacteraceae;Siccationidurans	0	0	0	14	0	0	0	0	0	0	0	2.65761e-05	0	0	0	0
Bacteria;Firmicutes;Negativicutes;Veillonellales;Veillonellaceae;Massilibacillus	0	0	0	0	0	0	0	13	0	0	0	0	0	0	0	2.48795e-05
Bacteria;Actinobacteria;Actinobacteria;Corynebacteriales;Nocardiaceae;Nocardia	0	0	0	13	0	0	0	0	0	0	0	2.46778e-05	0	0	0	0
Bacteria;Proteobacteria;Epsilonproteobacteria;Campylobacterales;Helicobacteraceae;Sulfuricurvum	0	0	0	13	0	0	0	0	0	0	0	2.46778e-05	0	0	0	0
Bacteria;Firmicutes;Bacilli;Bacillales;Planococcaceae;Rummeliibacillus	0	0	0	0	0	16	0	0	0	0	0	0	0	2.35685e-05	0	0
Bacteria;Proteobacteria;Alphaproteobacteria;Rhizobiales;Bradyrhizobiaceae;Afipia	0	0	0	0	0	0	0	12	0	0	0	0	0	0	0	2.29657e-05
Bacteria;Candidatus_Hydrogenedentes;Candidatus_Hydrogenedentes_noname;Candidatus_Hydrogenedentes_noname;Candidatus_Hydrogenedentes_noname;Candidatus_Hydrogenedentes_noname	0	12	0	0	0	0	0	0	0	2.2784e-05	0	0	0	0	0	0
Bacteria;Proteobacteria;Gammaproteobacteria;Oceanospirillales;Endozoicomonadaceae;Parendozoicomonas	0	12	0	0	0	0	0	0	0	2.2784e-05	0	0	0	0	0	0
Bacteria;Bacteroidetes;Chitinophagia;Chitinophagales;Chitinophagaceae;Flavisolibacter	0	0	0	12	0	0	0	0	0	0	0	2.27795e-05	0	0	0	0
Bacteria;Actinobacteria;Actinobacteria;Micrococcales;Intrasporangiaceae;Serinicoccus	0	0	0	5	0	0	7	0	0	0	0	9.49146e-06	0	0	1.2673e-05	0
Bacteria;Proteobacteria;Gammaproteobacteria;Methylococcales;Methylococcaceae;Methylocaldum	0	11	0	0	0	0	0	0	0	2.08853e-05	0	0	0	0	0	0
Bacteria;Proteobacteria;Betaproteobacteria;Burkholderiales;Comamonadaceae;Pseudorhodoferax	0	11	0	0	0	0	0	0	0	2.08853e-05	0	0	0	0	0	0
Bacteria;Proteobacteria;Betaproteobacteria;Burkholderiales;Burkholderiales_noname;Rhizobacter	0	11	0	0	0	0	0	0	0	2.08853e-05	0	0	0	0	0	0
Bacteria;Firmicutes;Bacilli;Bacillales;Sporolactobacillaceae;Sporolactobacillus	0	11	0	0	0	0	0	0	0	2.08853e-05	0	0	0	0	0	0
Bacteria;Actinobacteria;Actinobacteria;Micrococcales;Microbacteriaceae;Agromyces	0	0	0	11	0	0	0	0	0	0	0	2.08812e-05	0	0	0	0
Bacteria;Proteobacteria;Alphaproteobacteria;Rhizobiales;Phyllobacteriaceae;Aminobacter	0	0	0	11	0	0	0	0	0	0	0	2.08812e-05	0	0	0	0
Bacteria;Actinobacteria;Actinobacteria;Actinomycetales;Actinomycetaceae;Flaviflexus	0	0	0	11	0	0	0	0	0	0	0	2.08812e-05	0	0	0	0
Bacteria;Bacteroidetes;Cytophagia;Cytophagales;Cytophagales_noname;Solirubrum	0	0	0	11	0	0	0	0	0	0	0	2.08812e-05	0	0	0	0
Bacteria;Cyanobacteria;Cyanobacteria_noname;Chroococcidiopsidales;Chroococcidiopsidaceae;Aliterella	0	0	11	0	0	0	0	0	0	0	2.08672e-05	0	0	0	0	0
Bacteria;Fusobacteria;Fusobacteriia;Fusobacteriales;Fusobacteriaceae;Fusobacterium	0	0	0	0	0	14	0	0	0	0	0	0	0	2.06224e-05	0	0
Bacteria;Actinobacteria;Coriobacteriia;Eggerthellales;Eggerthellaceae;Eggerthella	0	0	0	0	0	0	11	0	0	0	0	0	0	0	1.99147e-05	0
Bacteria;Proteobacteria;Betaproteobacteria;Rhodocyclales;Zoogloeaceae;Azoarcus	0	10	0	0	0	0	0	0	0	1.89866e-05	0	0	0	0	0	0
Bacteria;Proteobacteria;Alphaproteobacteria;Sphingomonadales;Sphingomonadaceae;Sphingobium	0	10	0	0	0	0	0	0	0	1.89866e-05	0	0	0	0	0	0
Bacteria;Proteobacteria;Zetaproteobacteria;Zetaproteobacteria_noname;Zetaproteobacteria_noname;Zetaproteobacteria_noname	0	0	0	10	0	0	0	0	0	0	0	1.89829e-05	0	0	0	0
Bacteria;Firmicutes;Negativicutes;Veillonellales;Veillonellaceae;Veillonella	0	0	0	0	0	0	0	9	0	0	0	0	0	0	0	1.72243e-05
Bacteria;Proteobacteria;Betaproteobacteria;Burkholderiales;Alcaligenaceae;Pigmentiphaga	0	9	0	0	0	0	0	0	0	1.7088e-05	0	0	0	0	0	0
Bacteria;Proteobacteria;Deltaproteobacteria;Myxococcales;Archangiaceae;Vitiosangium	0	9	0	0	0	0	0	0	0	1.7088e-05	0	0	0	0	0	0
Bacteria;Proteobacteria;Gammaproteobacteria;Gammaproteobacteria_noname;Gammaproteobacteria_noname;Wohlfahrtiimonas	0	9	0	0	0	0	0	0	0	1.7088e-05	0	0	0	0	0	0
Bacteria;Proteobacteria;Gammaproteobacteria;Pseudomonadales;Pseudomonadaceae;Azotobacter	0	0	0	9	0	0	0	0	0	0	0	1.70846e-05	0	0	0	0
Bacteria;Proteobacteria;Alphaproteobacteria;Rhodobacterales;Rhodobacteraceae;Limimaricola	0	0	0	9	0	0	0	0	0	0	0	1.70846e-05	0	0	0	0
Bacteria;Bacteroidetes;Flavobacteriia;Flavobacteriales;Flavobacteriaceae;Mariniflexile	0	0	0	9	0	0	0	0	0	0	0	1.70846e-05	0	0	0	0
Bacteria;Proteobacteria;Alphaproteobacteria;Rhizobiales;Beijerinckiaceae;Methylocella	0	0	0	9	0	0	0	0	0	0	0	1.70846e-05	0	0	0	0
Bacteria;Proteobacteria;Alphaproteobacteria;Rhizobiales;Methylobacteriaceae;Methylorubrum	0	0	0	9	0	0	0	0	0	0	0	1.70846e-05	0	0	0	0
Bacteria;Actinobacteria;Actinobacteria;Propionibacteriales;Propionibacteriaceae;Raineyella	0	0	0	9	0	0	0	0	0	0	0	1.70846e-05	0	0	0	0
Bacteria;Actinobacteria;Actinobacteria;Micrococcales;Micrococcaceae;Glutamicibacter	0	0	0	3	0	0	6	0	0	0	0	5.69488e-06	0	0	1.08626e-05	0
Bacteria;Firmicutes;Clostridia;Clostridiales;Ruminococcaceae;Pygmaiobacter	0	0	0	0	0	0	0	8	0	0	0	0	0	0	0	1.53105e-05
Bacteria;Proteobacteria;Gammaproteobacteria;Vibrionales;Vibrionaceae;Salinivibrio	0	0	0	0	0	0	0	8	0	0	0	0	0	0	0	1.53105e-05
Archaea;Euryarchaeota;Halobacteria;Haloferacales;Haloferacaceae;Haloferax	0	8	0	0	0	0	0	0	0	1.51893e-05	0	0	0	0	0	0
Bacteria;Proteobacteria;Alphaproteobacteria;Rhizobiales;Hyphomicrobiaceae;Rhodoplanes	0	8	0	0	0	0	0	0	0	1.51893e-05	0	0	0	0	0	0
Bacteria;Spirochaetes;Spirochaetia;Brachyspirales;Brachyspiraceae;Brachyspira	0	0	0	8	0	0	0	0	0	0	0	1.51863e-05	0	0	0	0
Bacteria;Actinobacteria;Actinobacteria;Catenulisporales;Catenulisporaceae;Catenulispora	0	0	0	8	0	0	0	0	0	0	0	1.51863e-05	0	0	0	0
Bacteria;Bacteroidetes;Cytophagia;Cytophagales;Cytophagaceae;Cytophagaceae_noname	0	0	0	8	0	0	0	0	0	0	0	1.51863e-05	0	0	0	0
Bacteria;Proteobacteria;Betaproteobacteria;Burkholderiales;Alcaligenaceae;Paracandidimonas	0	0	0	8	0	0	0	0	0	0	0	1.51863e-05	0	0	0	0
Bacteria;Proteobacteria;Gammaproteobacteria;Enterobacterales;Pectobacteriaceae;Brenneria	0	0	0	0	0	0	0	7	0	0	0	0	0	0	0	1.33967e-05
Bacteria;Cyanobacteria;Cyanobacteria_noname;Nostocales;Nostocaceae;Anabaena	0	7	0	0	0	0	0	0	0	1.32907e-05	0	0	0	0	0	0
Bacteria;Proteobacteria;Alphaproteobacteria;Rhizobiales;Phyllobacteriaceae;Aliihoeflea	0	0	0	0	0	0	0	6	0	0	0	0	0	0	0	1.14828e-05
Bacteria;Proteobacteria;Alphaproteobacteria;Rhodobacterales;Rhodobacteraceae;Haematobacter	0	0	0	0	0	0	0	6	0	0	0	0	0	0	0	1.14828e-05
Bacteria;Proteobacteria;Alphaproteobacteria;Rhizobiales;Hyphomicrobiaceae;Pelagibacterium	0	0	0	6	0	0	0	0	0	0	0	1.13898e-05	0	0	0	0
Bacteria;Firmicutes;Bacilli;Lactobacillales;Aerococcaceae;Eremococcus	0	0	0	5.5	0	0	0	0	0	0	0	1.04406e-05	0	0	0	0
Bacteria;Proteobacteria;Gammaproteobacteria;Enterobacterales;Budviciaceae;Leminorella	0	0	0	0	0	0	0	5	0	0	0	0	0	0	0	9.56904e-06
Bacteria;Proteobacteria;Gammaproteobacteria;Oceanospirillales;Endozoicomonadaceae;Endozoicomonas	0	0	0	5	0	0	0	0	0	0	0	9.49146e-06	0	0	0	0
Bacteria;Proteobacteria;Gammaproteobacteria;Chromatiales;Chromatiaceae;Candidatus_Nitrosoglobus	5	0	0	0	0	0	0	0	8.76041e-06	0	0	0	0	0	0	0
Bacteria;Firmicutes;Clostridia;Clostridiales;Defluviitaleaceae;Vallitalea	0	0	0	4	0	0	0	0	0	0	0	7.59317e-06	0	0	0	0
Bacteria;Actinobacteria;Actinobacteria;Pseudonocardiales;Pseudonocardiaceae;Amycolatopsis	0	0	0	3.5	0	0	0	0	0	0	0	6.64402e-06	0	0	0	0
Bacteria;Proteobacteria;Alphaproteobacteria;Rhodobacterales;Rhodobacteraceae;Oceanicola	0	0	0	0	4	0	0	0	0	0	0	0	6.14364e-06	0	0	0
Bacteria;Cyanobacteria;Cyanobacteria_noname;Chroococcales;Chroococcaceae;Cyanosarcina	0	0	0	0	0	0	0	3	0	0	0	0	0	0	0	5.74142e-06
Bacteria;Proteobacteria;Alphaproteobacteria;Rhizobiales;Xanthobacteraceae;Ancylobacter	0	0	0	3	0	0	0	0	0	0	0	5.69488e-06	0	0	0	0
Bacteria;Firmicutes;Clostridia;Clostridiales;Ruminococcaceae;Ruminococcaceae_noname	0	0	0	0	0	0	2	0	0	0	0	0	0	0	3.62086e-06	0
Bacteria;Cyanobacteria;Cyanobacteria_noname;Chroococcales;Microcystaceae;Microcystis	2	0	0	0	0	0	0	0	3.50416e-06	0	0	0	0	0	0	0
Bacteria;Proteobacteria;Gammaproteobacteria;Enterobacterales;Enterobacteriaceae;Escherichia;Escherichia_coli	24178496	13885754	4.53334e+06	4.28773e+06	1.87124e+07	2.80569e+07	2.45177e+07	1.72838e+07	42.3627	26.3644	8.59983	8.13937	28.7406	41.3286	44.3875	33.078
Bacteria;Proteobacteria;Gammaproteobacteria;Enterobacterales;Enterobacteriaceae;Escherichia;Escherichia_albertii	3091280	5304826	827084	361685	6738356	1.77145e+06	1.70316e+06	2299171	5.41617	10.0721	1.56899	0.686584	10.3495	2.6094	3.08345	4.40017
Bacteria;Proteobacteria;Gammaproteobacteria;Enterobacterales;Enterobacteriaceae;Shigella;Shigella_sonnei	1195686	791622	281341	250755	1216169	1906209	1487612	953287	2.09494	1.50302	0.533709	0.476006	1.86793	2.8079	2.69322	1.82441
Bacteria;Proteobacteria;Gammaproteobacteria;Enterobacterales;Erwiniaceae;Erwinia;Erwinia_gerundensis	0	0	1695	6843853	55307	28.5	149	1167	0	0	0.00321545	12.9916	0.0849465	4.19814e-05	0.000269754	0.00223341
Bacteria;Proteobacteria;Gammaproteobacteria;Enterobacterales;Enterobacteriaceae;Kluyvera;Kluyvera_intermedia	0	2723	1919168	1364	78	24.5	172	419326	0	0.00517006	3.6407	0.00258927	0.000119801	3.60892e-05	0.000311394	0.802508
Bacteria;Proteobacteria;Gammaproteobacteria;Enterobacterales;Enterobacteriaceae;Salmonella;Salmonella_enterica	131537	109106	261914	41615.5	842914	450418	157081	112980	0.230464	0.207156	0.496855	0.0789984	1.29464	0.663479	0.284384	0.216221
Bacteria;Proteobacteria;Gammaproteobacteria;Enterobacterales;Enterobacteriaceae;Klebsiella;Klebsiella_pneumoniae	251446	236038	111988	96512.5	246556	334602	253874	207388	0.440553	0.448157	0.212443	0.183209	0.378688	0.492878	0.459621	0.396901
Bacteria;Firmicutes;Bacilli;Lactobacillales;Carnobacteriaceae;Carnobacterium;Carnobacterium_mobile	0	0	0	1295769	0	0	148	0	0	0	0	2.45975	0	0	0.000267944	0
Bacteria;Proteobacteria;Gammaproteobacteria;Pseudomonadales;Moraxellaceae;Psychrobacter;Psychrobacter_urativorans	0	2	2969	947536	4430.5	53	2437	177	0	3.79733e-06	0.00563225	1.7987	0.00680485	7.80706e-05	0.00441202	0.000338744
Bacteria;Proteobacteria;Gammaproteobacteria;Enterobacterales;Enterobacteriaceae;Shigella;Shigella_flexneri	133163	93815	29219	26325	140308	219003	162309	111172	0.233312	0.178123	0.055429	0.0499726	0.2155	0.322598	0.293849	0.212762
Bacteria;Proteobacteria;Gammaproteobacteria;Enterobacterales;Hafniaceae;Obesumbacterium;Obesumbacterium_proteus	0	6	376996	7	0	0	0	80827	0	1.1392e-05	0.715168	1.3288e-05	0	0	0	0.154687
Bacteria;Proteobacteria;Gammaproteobacteria;Enterobacterales;Hafniaceae;Hafnia;Hafnia_alvei	0	31	301056	774	0	0	27	56655.5	0	5.88586e-05	0.571109	0.00146928	0	0	4.88816e-05	0.108428
Bacteria;Proteobacteria;Gammaproteobacteria;Enterobacterales;Enterobacteriaceae;Enterobacter;Enterobacter_cloacae	46816	45022	36161	25464	43540	61025	65898	46980	0.0820254	0.0854817	0.0685981	0.0483381	0.0668735	0.0898917	0.119304	0.0899107
Bacteria;Proteobacteria;Gammaproteobacteria;Pseudomonadales;Pseudomonadaceae;Pseudomonas;Pseudomonas_lundensis	0	247	54496	210992	49.5	0	494	14634	0	0.00046897	0.10338	0.400525	7.60275e-05	0	0.000894352	0.0280067
Bacteria;Proteobacteria;Gammaproteobacteria;Enterobacterales;Enterobacteriaceae;Cronobacter;Cronobacter_sakazakii	31233	20862	10390	12612	28347	50226	33348	25089	0.0547228	0.0396099	0.01971	0.0239413	0.0435384	0.0739844	0.0603742	0.0480155
Bacteria;Proteobacteria;Gammaproteobacteria;Enterobacterales;Enterobacteriaceae;Klebsiella;Klebsiella_quasipneumoniae	24893	24363.5	13579	14025	23102	22588	26405	21276.5	0.0436146	0.0462581	0.0257596	0.0266236	0.0354826	0.0332728	0.0478044	0.0407191
Bacteria;Firmicutes;Bacilli;Lactobacillales;Lactobacillaceae;Lactobacillus;Lactobacillus_aviarius	3585	78079	752	1618.5	55403.5	12730.5	4785.5	3690	0.00628121	0.148246	0.00142656	0.00307239	0.0850948	0.0187524	0.00866381	0.00706195
Bacteria;Proteobacteria;Gammaproteobacteria;Enterobacterales;Erwiniaceae;Pantoea;Pantoea_agglomerans	2	866	215	132476	891	16	2179	1029	3.50416e-06	0.00164424	0.000407859	0.251477	0.0013685	2.35685e-05	0.00394493	0.00196931
Bacteria;Firmicutes;Bacilli;Lactobacillales;Enterococcaceae;Catellicoccus;Catellicoccus_marimammalium	4601.5	87647	2893	5560.5	5447	6361	15815	369.5	0.0080622	0.166412	0.00548808	0.0105555	0.0083661	0.00936994	0.0286319	0.000707152
Bacteria;Proteobacteria;Gammaproteobacteria;Enterobacterales;Enterobacteriaceae;Enterobacter;Enterobacter_hormaechei	8672.5	27535	17549.5	26158	10028	11881	11543	11775.5	0.0151949	0.0522797	0.0332917	0.0496555	0.0154021	0.0175011	0.0208978	0.022536
Bacteria;Firmicutes;Bacilli;Lactobacillales;Streptococcaceae;Lactococcus;Lactococcus_garvieae	0	0	100260	0	0	0	0	16797	0	0	0.190195	0	0	0	0	0.0321462
Bacteria;Proteobacteria;Gammaproteobacteria;Enterobacterales;Erwiniaceae;Pantoea;Pantoea_ananatis	20716	11648	4391	8769	19040	21062	21415	16185	0.0362961	0.0221156	0.00832981	0.0166461	0.0292437	0.031025	0.0387704	0.030975
Bacteria;Proteobacteria;Alphaproteobacteria;Rhodobacterales;Rhodobacteraceae;Rhodobacter;Rhodobacter_sphaeroides	0	0	0	102933	0	0	0	0	0	0	0	0.195397	0	0	0	0
Bacteria;Proteobacteria;Gammaproteobacteria;Pseudomonadales;Moraxellaceae;Acinetobacter;Acinetobacter_sp_TGL-Y2	0	49	4	102710	5	0	0	0	0	9.30346e-05	7.58807e-06	0.194975	7.67955e-06	0	0	0
Bacteria;Proteobacteria;Gammaproteobacteria;Enterobacterales;Enterobacteriaceae;Leclercia;Leclercia_adecarboxylata	3098	62696	15659	3087	11085	2761	2627	4383.5	0.00542795	0.119039	0.0297054	0.00586003	0.0170256	0.00406704	0.004756	0.00838918
Bacteria;Proteobacteria;Gammaproteobacteria;Pseudomonadales;Moraxellaceae;Psychrobacter;Psychrobacter_frigidicola	0	1	544.5	97168	555	8	242	22	0	1.89866e-06	0.00103293	0.184453	0.00085243	1.17842e-05	0.000438124	4.21038e-05
Bacteria;Proteobacteria;Gammaproteobacteria;Pseudomonadales;Moraxellaceae;Acinetobacter;Acinetobacter_baumannii	9815	13955	6522	18161	15735	17270	11448	9667	0.0171967	0.0264959	0.0123724	0.0344749	0.0241675	0.0254392	0.0207258	0.0185008
Bacteria;Firmicutes;Bacilli;Lactobacillales;Enterococcaceae;Enterococcus;Enterococcus_faecalis	1107.5	76916	770	7431.5	13	980.5	14	308	0.00194043	0.146038	0.0014607	0.0141072	1.99668e-05	0.00144431	2.5346e-05	0.000589453
Bacteria;Proteobacteria;Gammaproteobacteria;Enterobacterales;Enterobacteriaceae;Cronobacter;Cronobacter_malonaticus	12573	9966	5955	3599	16123	17922	18017	11534	0.0220289	0.0189221	0.0112967	0.00683195	0.0247635	0.0263996	0.0326185	0.0220739
Bacteria;Proteobacteria;Gammaproteobacteria;Enterobacterales;Enterobacteriaceae;Citrobacter;Citrobacter_koseri	13583	18008	8380	1721	22513	8041	9851	8872.5	0.0237985	0.0341912	0.015897	0.00326696	0.0345779	0.0118446	0.0178345	0.0169803
Bacteria;Proteobacteria;Gammaproteobacteria;Oceanospirillales;Halomonadaceae;Zymobacter;Zymobacter_palmae	13401	11589	4973	2841	14323	17132	12494	10355	0.0234796	0.0220036	0.00943387	0.00539305	0.0219988	0.0252359	0.0226195	0.0198175
Bacteria;Proteobacteria;Gammaproteobacteria;Enterobacterales;Enterobacteriaceae;Enterobacteriaceae_noname;Enterobacteriaceae_bacterium	0	117	62797	167	1	0	7.5	13960.5	0	0.000222144	0.119127	0.000317015	1.53591e-06	0	1.35782e-05	0.0267177
Bacteria;Proteobacteria;Gammaproteobacteria;Enterobacterales;Enterobacteriaceae;Shigella;Shigella_dysenteriae	13719	6083	1279	2646	13606	21642	15464	11406	0.0240368	0.0115496	0.00242629	0.00502288	0.0208976	0.0318793	0.0279965	0.0218289
Bacteria;Proteobacteria;Gammaproteobacteria;Enterobacterales;Enterobacteriaceae;Enterobacter;Enterobacter_ludwigii	9555	11578	9706	7266	8472	13198	11702	9846.5	0.0167411	0.0219827	0.0184125	0.013793	0.0130122	0.019441	0.0211856	0.0188443
Bacteria;Firmicutes;Bacilli;Bacillales;Listeriaceae;Brochothrix;Brochothrix_thermosphacta	3268	66509	194	935	427	2771	1007	191	0.0057258	0.126278	0.000368022	0.0017749	0.000655833	0.00408177	0.0018231	0.000365537
Bacteria;Proteobacteria;Gammaproteobacteria;Enterobacterales;Enterobacteriaceae;Enterobacter;Enterobacter_kobei	10359	12909	6438	2627	11641	5325	17436	8552.5	0.0181498	0.0245099	0.012213	0.00498681	0.0178795	0.00784388	0.0315667	0.0163678
Bacteria;Proteobacteria;Gammaproteobacteria;Enterobacterales;Enterobacteriaceae;Raoultella;Raoultella_terrigena	322	8969	37748	534	2936	3355	716	10174	0.00056417	0.0170291	0.0716087	0.00101369	0.00450943	0.00494202	0.00129627	0.0194711
Bacteria;Firmicutes;Bacilli;Lactobacillales;Carnobacteriaceae;Carnobacterium;Carnobacterium_sp_CP1	0	0	0	63244.5	0	0	4	0	0	0	0	0.120057	0	0	7.24172e-06	0
Bacteria;Proteobacteria;Gammaproteobacteria;Enterobacterales;Enterobacteriaceae;Klebsiella;Klebsiella_variicola	9998	11552	2642	4056	9301.5	14205	10099	6987.5	0.0175173	0.0219334	0.00501192	0.00769947	0.0142863	0.0209244	0.0182835	0.0133727
Bacteria;Proteobacteria;Gammaproteobacteria;Enterobacterales;Enterobacteriaceae;Escherichia;Escherichia_fergusonii	11798	348	2571	2497	11599	14934	13213	8616	0.0206711	0.000660735	0.00487724	0.00474004	0.017815	0.0219982	0.0239212	0.0164894
Bacteria;Proteobacteria;Gammaproteobacteria;Pseudomonadales;Moraxellaceae;Acinetobacter;Acinetobacter_harbinensis	0	117	2	47295	648	14	7595	0	0	0.000222144	3.79404e-06	0.0897797	0.000995269	2.06224e-05	0.0137502	0
Bacteria;Proteobacteria;Gammaproteobacteria;Enterobacterales;Hafniaceae;Hafnia;Hafnia_paralvei	0	203	41368	327	0	0	614	10311.5	0	0.000385429	0.0784759	0.000620742	0	0	0.0011116	0.0197342
Bacteria;Actinobacteria;Actinobacteria;Corynebacteriales;Mycobacteriaceae;Mycobacterium;Mycobacterium_tuberculosis	9714	5245	1790	1746	8276	14888	10060	6329	0.0170197	0.0099585	0.00339566	0.00331442	0.0127112	0.0219305	0.0182129	0.0121125
Bacteria;Proteobacteria;Gammaproteobacteria;Enterobacterales;Enterobacteriaceae;Enterobacter;Enterobacter_sp_SA187	6	1550	0	19594	62	0	30783	14	1.05125e-05	0.00294293	0	0.0371951	9.52264e-05	0	0.0557305	2.67933e-05
Bacteria;Proteobacteria;Gammaproteobacteria;Enterobacterales;Enterobacteriaceae;Raoultella;Raoultella_planticola	7181	7862	5657	3039	6756	8109	6825	8561	0.0125817	0.0149273	0.0107314	0.00576891	0.0103766	0.0119448	0.0123562	0.0163841
Bacteria;Proteobacteria;Gammaproteobacteria;Xanthomonadales;Xanthomonadaceae;Stenotrophomonas;Stenotrophomonas_maltophilia	12443	6275	1118	6404	7911	7261	8954	3401	0.0218011	0.0119141	0.00212087	0.0121567	0.0121506	0.0106957	0.0162106	0.00650886
Bacteria;Proteobacteria;Gammaproteobacteria;Gammaproteobacteria_noname;Gammaproteobacteria_noname;Gammaproteobacteria_noname;Gammaproteobacteria_bacterium_RIFCSPHIGHO2_12_FULL_42_10	7859	6708	1923	1749	8465	10009	9431	6533	0.0137696	0.0127362	0.00364797	0.00332011	0.0130015	0.0147436	0.0170742	0.0125029
Bacteria;Proteobacteria;Gammaproteobacteria;Pseudomonadales;Pseudomonadaceae;Pseudomonas;Pseudomonas_oleovorans	7375	7311	2088	1534	8099	10243	7644	5172	0.0129216	0.0138811	0.00396098	0.00291198	0.0124393	0.0150882	0.0138389	0.00989821
Bacteria;Proteobacteria;Gammaproteobacteria;Enterobacterales;Enterobacteriaceae;Raoultella;Raoultella_ornithinolytica	5189	7986	1157	3181	4004	6407.5	4573	13401	0.00909155	0.0151627	0.00219485	0.00603847	0.00614978	0.00943844	0.0082791	0.0256469
Bacteria;Proteobacteria;Gammaproteobacteria;Enterobacterales;Enterobacteriaceae;Klebsiella;Klebsiella_aerogenes	8500	7300	1438	1556	5175	4166	6868	7295	0.0148927	0.0138603	0.00272791	0.00295374	0.00794833	0.00613664	0.012434	0.0139612
Bacteria;Proteobacteria;Gammaproteobacteria;Pseudomonadales;Moraxellaceae;Psychrobacter;Psychrobacter_glacincola	0	0	131	38968.5	114	7	157	12	0	0	0.000248509	0.0739736	0.000175094	1.03112e-05	0.000284237	2.29657e-05
Bacteria;Proteobacteria;Betaproteobacteria;Burkholderiales;Burkholderiaceae;Burkholderia;Burkholderia_pseudomallei	3582	3062	4372	2035	8229	8461	9500	3387	0.00627596	0.00581371	0.00829377	0.00386303	0.012639	0.0124633	0.0171991	0.00648207
Bacteria;Proteobacteria;Gammaproteobacteria;Enterobacterales;Enterobacteriaceae;Cronobacter;Cronobacter_turicensis	7713	6789	1655	1297	9635	6555	5730	2962	0.0135138	0.01289	0.00313957	0.00246209	0.0147985	0.00965571	0.0103738	0.0056687
Bacteria;Proteobacteria;Gammaproteobacteria;Enterobacterales;Enterobacteriaceae;Kluyvera;Kluyvera_cryocrescens	5	432.5	5579	4635	968	0	2	25754.5	8.76041e-06	0.000821172	0.0105835	0.00879859	0.00148676	0	3.62086e-06	0.0492892
Bacteria;Proteobacteria;Gammaproteobacteria;Pseudomonadales;Pseudomonadaceae;Pseudomonas;Pseudomonas_aeruginosa	4380	4244	2227	10981	5021	5857	4403	3062	0.00767412	0.00805793	0.00422466	0.0208452	0.0077118	0.00862754	0.00797132	0.00586008
Bacteria;Firmicutes;Bacilli;Lactobacillales;Aerococcaceae;Aerococcus;Aerococcus_viridans	3057	34162	0	206	0.5	0	0	0	0.00535611	0.0648622	0	0.000391048	7.67955e-07	0	0	0
Bacteria;Proteobacteria;Gammaproteobacteria;Enterobacterales;Enterobacteriaceae;Pseudocitrobacter;Pseudocitrobacter_sp_RIT_415	0	3	28193	37	13	0	0	8053	0	5.69599e-06	0.0534826	7.02368e-05	1.99668e-05	0	0	0.0154119
Bacteria;Proteobacteria;Gammaproteobacteria;Enterobacterales;Enterobacteriaceae;Shigella;Shigella_boydii	6636	5218	1827	1255	6462	7241	6452	4788	0.0116268	0.00990723	0.00346585	0.00238236	0.00992505	0.0106662	0.0116809	0.00916331
Bacteria;Proteobacteria;Gammaproteobacteria;Enterobacterales;Enterobacteriaceae;Citrobacter;Citrobacter_freundii	2113	2765	9662	747	2417	3168	2997	12662.5	0.00370215	0.00524981	0.018329	0.00141802	0.00371229	0.00466656	0.00542586	0.0242336
Bacteria;Proteobacteria;Gammaproteobacteria;Enterobacterales;Enterobacteriaceae;Citrobacter;Citrobacter_sp_S-77	0	0	28817	184	0	0	0	5221	0	0	0.0546664	0.000349286	0	0	0	0.00999199
Bacteria;Proteobacteria;Gammaproteobacteria;Enterobacterales;Enterobacteriaceae;Cronobacter;Cronobacter_universalis	3760	8278	841	7830	6179	5444	5	2981	0.00658783	0.0157171	0.00159539	0.0148636	0.00949038	0.00801918	9.05215e-06	0.00570506
Bacteria;Proteobacteria;Gammaproteobacteria;Pseudomonadales;Moraxellaceae;Psychrobacter;Psychrobacter_cryohalolentis	0	0	28	32154	63.5	0	98	4	0	0	5.31165e-05	0.0610377	9.75303e-05	0	0.000177422	7.65523e-06
Bacteria;Proteobacteria;Betaproteobacteria;Burkholderiales;Burkholderiaceae;Cupriavidus;Cupriavidus_taiwanensis	9495	3837	1220	2340	4565	4796	5675	3306	0.016636	0.00728518	0.00231436	0.004442	0.00701143	0.00706465	0.0102742	0.00632705
Bacteria;Proteobacteria;Gammaproteobacteria;Pseudomonadales;Moraxellaceae;Psychrobacter;Psychrobacter_sp_JB193	0	11	35.5	31178	83.5	12.5	72	2	0	2.08853e-05	6.73442e-05	0.059185	0.000128248	1.84129e-05	0.000130351	3.82762e-06
Bacteria;Proteobacteria;Gammaproteobacteria;Enterobacterales;Yersiniaceae;Serratia;Serratia_marcescens	1506	2465.5	1078	15801	2573	3364	3334	2638.5	0.00263863	0.00468116	0.00204499	0.0299949	0.0039519	0.00495527	0.00603597	0.00504958
Bacteria;Proteobacteria;Gammaproteobacteria;Enterobacterales;Enterobacteriaceae;Klebsiella;Klebsiella_oxytoca	2594	12324	1751	3298	2797.5	2390	668	5792	0.0045449	0.0233991	0.00332168	0.00626057	0.00429671	0.00352054	0.00120937	0.0110848
Bacteria;Proteobacteria;Gammaproteobacteria;Enterobacterales;Yersiniaceae;Yersinia;Yersinia_pestis	6077	5737	844	1189	7897	2137	4010	3593	0.0106474	0.0108926	0.00160108	0.00225707	0.0121291	0.00314787	0.00725982	0.00687631
Bacteria;Proteobacteria;Gammaproteobacteria;Pseudomonadales;Pseudomonadaceae;Pseudomonas;Pseudomonas_savastanoi	4057	3852	1885	2101.5	4536	5846	5736	3400	0.00710819	0.00731366	0.00357588	0.00398926	0.00696689	0.00861133	0.0103846	0.00650695
Bacteria;Proteobacteria;Gammaproteobacteria;Enterobacterales;Enterobacteriaceae;Klebsiella;Klebsiella_sp_WCHKl090001	0	22	23457	0	0	0	0	4577	0	4.17706e-05	0.0444984	0	0	0	0	0.0087595
Bacteria;Proteobacteria;Gammaproteobacteria;Pseudomonadales;Moraxellaceae;Psychrobacter;Psychrobacter_sp_Sarcosine-02u-2	0	9	93	26261	87	8	366	38	0	1.7088e-05	0.000176423	0.0498511	0.000133624	1.17842e-05	0.000662617	7.27247e-05
Bacteria;Proteobacteria;Gammaproteobacteria;Pseudomonadales;Moraxellaceae;Psychrobacter;Psychrobacter_sp_DAB_AL43B	0	0	104	26519	78	0	117	3	0	0	0.00019729	0.0503408	0.000119801	0	0.00021182	5.74142e-06
Bacteria;Proteobacteria;Gammaproteobacteria;Pseudomonadales;Moraxellaceae;Psychrobacter;Psychrobacter_sp_PAMC_21119	0	0	244	24553.5	167	13	144	1	0	0	0.000462873	0.0466097	0.000256497	1.91494e-05	0.000260702	1.91381e-06
Bacteria;Proteobacteria;Gammaproteobacteria;Pseudomonadales;Moraxellaceae;Psychrobacter;Psychrobacter_cibarius	0	0	39	23504	34	0	75	18	0	0	7.39837e-05	0.0446175	5.22209e-05	0	0.000135782	3.44485e-05
Bacteria;Proteobacteria;Gammaproteobacteria;Vibrionales;Vibrionaceae;Vibrio;Vibrio_parahaemolyticus	4956	4472	350	390	4876	5431	3721	991	0.00868331	0.00849083	0.000663957	0.000740334	0.00748909	0.00800003	0.00673661	0.00189658
Bacteria;Proteobacteria;Gammaproteobacteria;Enterobacterales;Morganellaceae;Photorhabdus;Photorhabdus_luminescens	0	0	0	0	0	28571	0	0	0	0	0	0	0	0.0420859	0	0
Bacteria;Proteobacteria;Gammaproteobacteria;Enterobacterales;Erwiniaceae;Pantoea;Pantoea_sp_RIT-PI-b	0	21	34	21283	63	0	0	10	0	3.9872e-05	6.44986e-05	0.0404014	9.67623e-05	0	0	1.91381e-05
Bacteria;Proteobacteria;Betaproteobacteria;Burkholderiales;Burkholderiaceae;Burkholderia;Burkholderia_sp_SJ98	6075	2867	817	606	3799	2115	4107	2499	0.0106439	0.00544347	0.00154986	0.00115037	0.00583492	0.00311546	0.00743544	0.00478261
Bacteria;Proteobacteria;Gammaproteobacteria;Enterobacterales;Enterobacteriaceae;Escherichia;Escherichia_marmotae	322	7938	8	0	4565	3031	4219	1387	0.00056417	0.0150716	1.51761e-05	0	0.00701143	0.00446475	0.0076382	0.00265445
Bacteria;Firmicutes;Bacilli;Lactobacillales;Carnobacteriaceae;Carnobacterium;Carnobacterium_inhibens	0	0	6	18956	0	1	1	0	0	0	1.13821e-05	0.035984	0	1.47303e-06	1.81043e-06	0
Bacteria;Proteobacteria;Gammaproteobacteria;Pseudomonadales;Moraxellaceae;Psychrobacter;Psychrobacter_sp_G	0	0	183	18474	94	2	103	3	0	0	0.000347154	0.0350691	0.000144375	2.94606e-06	0.000186474	5.74142e-06
Bacteria;Proteobacteria;Gammaproteobacteria;Pseudomonadales;Moraxellaceae;Psychrobacter;Psychrobacter_sp_DAB_AL32B	0	0	75	18216	56	3	314	16	0	0	0.000142276	0.0345793	8.60109e-05	4.41909e-06	0.000568475	3.06209e-05
Bacteria;Proteobacteria;Gammaproteobacteria;Enterobacterales;Erwiniaceae;Erwinia;Erwinia_rhapontici	0	8	1640	16034	0	0	0	415	0	1.51893e-05	0.00311111	0.0304372	0	0	0	0.00079423
Bacteria;Firmicutes;Bacilli;Lactobacillales;Carnobacteriaceae;Carnobacterium;Carnobacterium_sp_17-4	0	3	30.5	17841	4	0	2	0	0	5.69599e-06	5.78591e-05	0.0338674	6.14364e-06	0	3.62086e-06	0
Bacteria;Proteobacteria;Gammaproteobacteria;Pseudomonadales;Moraxellaceae;Acinetobacter;Acinetobacter_celticus	0	16	0	17465	0	0	28	0	0	3.03786e-05	0	0.0331537	0	0	5.0692e-05	0
Bacteria;Proteobacteria;Gammaproteobacteria;Pseudomonadales;Moraxellaceae;Psychrobacter;Psychrobacter_aquaticus	0	0	43	16856	62.5	1	88	8	0	0	8.15718e-05	0.0319976	9.59943e-05	1.47303e-06	0.000159318	1.53105e-05
Bacteria;Proteobacteria;Gammaproteobacteria;Enterobacterales;Enterobacteriaceae;Enterobacter;Enterobacter_asburiae	1055	1030	4250	205	1113	2109	1527	6522	0.00184845	0.00195562	0.00806233	0.00038915	0.00170947	0.00310662	0.00276453	0.0124819
Bacteria;Firmicutes;Bacilli;Lactobacillales;Enterococcaceae;Enterococcus;Enterococcus_faecium	286	5911	2269	70	901.5	9174	134	381	0.000501095	0.011223	0.00430434	0.00013288	0.00138462	0.0135136	0.000242598	0.000729161
Bacteria;Proteobacteria;Gammaproteobacteria;Enterobacterales;Pectobacteriaceae;Dickeya;Dickeya_sp_NCPPB_569	0	0	13594	0	0	0	0	3221	0	0	0.0257881	0	0	0	0	0.00616437
Bacteria;Proteobacteria;Gammaproteobacteria;Pseudomonadales;Moraxellaceae;Psychrobacter;Psychrobacter_sp_MES7-P7E	0	0	26	16642.5	25	1	110	16	0	0	4.93225e-05	0.0315923	3.83977e-05	1.47303e-06	0.000199147	3.06209e-05
Bacteria;Firmicutes;Bacilli;Lactobacillales;Streptococcaceae;Lactococcus;Lactococcus_lactis	79	5030	6831	5	977	2824	214	1611	0.000138414	0.00955028	0.0129585	9.49146e-06	0.00150058	0.00415984	0.000387432	0.00308314
Bacteria;Proteobacteria;Gammaproteobacteria;Enterobacterales;Enterobacteriaceae;Cronobacter;Cronobacter_dublinensis	2	989	1836	11479	765	451	95	1262	3.50416e-06	0.00187778	0.00348293	0.0217905	0.00117497	0.000664337	0.000171991	0.00241523
Bacteria;Proteobacteria;Alphaproteobacteria;Rhodobacterales;Rhodobacteraceae;Epibacterium;Epibacterium_ulvae	0	0	53	16438	41	3	42	38	0	0	0.000100542	0.0312041	6.29723e-05	4.41909e-06	7.60381e-05	7.27247e-05
Bacteria;Proteobacteria;Gammaproteobacteria;Enterobacterales;Enterobacteriaceae;Kluyvera;Kluyvera_georgiana	0	86	12710	43	359	0	0	3200	0	0.000163285	0.0241111	8.16266e-05	0.000551392	0	0	0.00612418
Bacteria;Proteobacteria;Gammaproteobacteria;Enterobacterales;Enterobacteriaceae;Cedecea;Cedecea_neteri	3658	2800	336	0	2947	4626	3947	73	0.00640911	0.00531626	0.000637398	0	0.00452633	0.00681424	0.00714577	0.000139708
Bacteria;Proteobacteria;Gammaproteobacteria;Vibrionales;Vibrionaceae;Vibrio;Vibrio_cholerae	547	840	4998	5817	937	453	579	2130	0.000958388	0.00159488	0.0094813	0.0110424	0.00143915	0.000667283	0.00104824	0.00407641
Bacteria;Proteobacteria;Gammaproteobacteria;Enterobacterales;Yersiniaceae;Serratia;Serratia_fonticola	0	58	9414	368	4294	0	0	2466	0	0.000110123	0.0178585	0.000698572	0.0065952	0	0	0.00471945
Bacteria;Proteobacteria;Gammaproteobacteria;Pseudomonadales;Pseudomonadaceae;Pseudomonas;Pseudomonas_fluorescens	161	1847	1483	10533	508	0	353	885.5	0.000282085	0.00350683	0.00281328	0.0199947	0.000780242	0	0.000639082	0.00169468
Bacteria;Proteobacteria;Gammaproteobacteria;Enterobacterales;Enterobacteriaceae;Enterobacter;Enterobacter_roggenkampii	0	96	11212	171	244	6	200	3576	0	0.000182272	0.0212694	0.000324608	0.000374762	8.83818e-06	0.000362086	0.00684378
Bacteria;Proteobacteria;Gammaproteobacteria;Pseudomonadales;Moraxellaceae;Moraxella;Moraxella_lincolnii	0	0	21	15347	0	0	1	0	0	0	3.98374e-05	0.0291331	0	0	1.81043e-06	0
Bacteria;Proteobacteria;Gammaproteobacteria;Enterobacterales;Enterobacteriaceae;Buttiauxella;Buttiauxella_agrestis	0	0	12214	21	0	0	0	2549	0	0	0.0231702	3.98641e-05	0	0	0	0.0048783
Bacteria;Actinobacteria;Actinobacteria;Micrococcales;Microbacteriaceae;Microbacterium;Microbacterium_sp_SUBG005	3650	1476	503	496	2461	2864	2814	1961	0.0063951	0.00280243	0.0009542	0.000941553	0.00377987	0.00421876	0.00509455	0.00375298
Bacteria;Proteobacteria;Gammaproteobacteria;Pseudomonadales;Moraxellaceae;Psychrobacter;Psychrobacter_sp_L7	0	0	51	14225	53	1	100	0	0	0	9.6748e-05	0.0270032	8.14032e-05	1.47303e-06	0.000181043	0
Bacteria;Proteobacteria;Gammaproteobacteria;Pseudomonadales;Moraxellaceae;Psychrobacter;Psychrobacter_sp_Rd_272	0	0	35	13980	28	0	36	14	0	0	6.63957e-05	0.0265381	4.30055e-05	0	6.51755e-05	2.67933e-05
Bacteria;Firmicutes;Bacilli;Lactobacillales;Enterococcaceae;Enterococcus;Enterococcus_aquimarinus	0	0	0	13895	0	0	2	0	0	0	0	0.0263768	0	0	3.62086e-06	0
Bacteria;Proteobacteria;Gammaproteobacteria;Enterobacterales;Enterobacteriaceae;Escherichia;Escherichia_sp_MOD1-EC6163	6433	5877	11	0	2333	16	35	0	0.0112711	0.0111585	2.08672e-05	0	0.00358328	2.35685e-05	6.3365e-05	0
Bacteria;Proteobacteria;Gammaproteobacteria;Pseudomonadales;Moraxellaceae;Psychrobacter;Psychrobacter_immobilis	0	0	105	13318	118	2	44	10	0	0	0.000199187	0.0252815	0.000181237	2.94606e-06	7.96589e-05	1.91381e-05
Bacteria;Proteobacteria;Gammaproteobacteria;Pseudomonadales;Moraxellaceae;Psychrobacter;Psychrobacter_sp_4Bb	0	0	15	13138	19	2	83	3	0	0	2.84553e-05	0.0249398	2.91823e-05	2.94606e-06	0.000150266	5.74142e-06
Bacteria;Proteobacteria;Alphaproteobacteria;Rhizobiales;Rhizobiaceae;Rhizobium;Rhizobium_freirei	422	1515	144	174	2713	4240	3250	2126	0.000739378	0.00287648	0.000273171	0.000330303	0.00416692	0.00624565	0.0058839	0.00406876
Bacteria;Proteobacteria;Gammaproteobacteria;Pseudomonadales;Moraxellaceae;Psychrobacter;Psychrobacter_sp_P11F6	0	0	407	11820	226	13	77	13	0	0	0.000772087	0.0224378	0.000347116	1.91494e-05	0.000139403	2.48795e-05
Bacteria;Proteobacteria;Gammaproteobacteria;Pseudomonadales;Moraxellaceae;Psychrobacter;Psychrobacter_sp_Sarcosine-3u-12	0	0	321	11640	141	8	45	3	0	0	0.000608943	0.0220961	0.000216563	1.17842e-05	8.14693e-05	5.74142e-06
Bacteria;Proteobacteria;Gammaproteobacteria;Enterobacterales;Erwiniaceae;Pantoea;Pantoea_vagans	0	22	34	10743	393.5	0	177	706	0	4.17706e-05	6.44986e-05	0.0203934	0.00060438	0	0.000320446	0.00135115
Bacteria;Firmicutes;Bacilli;Lactobacillales;Carnobacteriaceae;Carnobacterium;Carnobacterium_iners	0	0	0	11809	0	0	0	0	0	0	0	0.0224169	0	0	0	0
Bacteria;Proteobacteria;Gammaproteobacteria;Pseudomonadales;Moraxellaceae;Psychrobacter;Psychrobacter_sp_SHUES1	0	0	31	11406	22	5	321	7	0	0	5.88076e-05	0.0216519	3.379e-05	7.36515e-06	0.000581148	1.33967e-05
Bacteria;Firmicutes;Clostridia;Clostridiales;Clostridiaceae;Clostridium;Clostridium_saccharobutylicum	11	11666	0	0	0	4	0	0	1.92729e-05	0.0221498	0	0	0	5.89212e-06	0	0
Bacteria;Firmicutes;Bacilli;Lactobacillales;Carnobacteriaceae;Carnobacterium;Carnobacterium_pleistocenium	0	0	0	11606	0	0	0	0	0	0	0	0.0220316	0	0	0	0
Bacteria;Proteobacteria;Gammaproteobacteria;Pseudomonadales;Moraxellaceae;Moraxella;Moraxella_lacunata	0	0	5	11577	17	0	2	0	0	0	9.48509e-06	0.0219765	2.61105e-05	0	3.62086e-06	0
Bacteria;Proteobacteria;Betaproteobacteria;Burkholderiales;Burkholderiaceae;Caballeronia;Caballeronia_mineralivorans	3656	2768	612	0	1638	1682	1034	912	0.00640561	0.0052555	0.00116098	0	0.00251582	0.00247764	0.00187198	0.00174539
Bacteria;Proteobacteria;Gammaproteobacteria;Pseudomonadales;Moraxellaceae;Psychrobacter;Psychrobacter_sp_P11G3	0	0	9	11232	33	0	6	3	0	0	1.70732e-05	0.0213216	5.0685e-05	0	1.08626e-05	5.74142e-06
Bacteria;Proteobacteria;Gammaproteobacteria;Enterobacterales;Enterobacteriaceae;Enterobacter;Enterobacter_cancerogenus	630	1752	800	705	3618	4957	0	600	0.00110381	0.00332646	0.00151761	0.0013383	0.00555692	0.00730181	0	0.00114828
Bacteria;Proteobacteria;Gammaproteobacteria;Pasteurellales;Pasteurellaceae;Bisgaardia;Bisgaardia_hudsonensis	0	0	43	11005	14	1	63	13	0	0	8.15718e-05	0.0208907	2.15027e-05	1.47303e-06	0.000114057	2.48795e-05
Bacteria;Proteobacteria;Gammaproteobacteria;Pseudomonadales;Moraxellaceae;Psychrobacter;Psychrobacter_sp_4Dc	0	0	31	10976	39	0	41	2.5	0	0	5.88076e-05	0.0208357	5.99005e-05	0	7.42276e-05	4.78452e-06
Bacteria;Proteobacteria;Gammaproteobacteria;Pseudomonadales;Moraxellaceae;Psychrobacter;Psychrobacter_sp_C_209	0	0	397	10344	264	1	25	6	0	0	0.000753116	0.0196359	0.00040548	1.47303e-06	4.52607e-05	1.14828e-05
Bacteria;Proteobacteria;Gammaproteobacteria;Pseudomonadales;Pseudomonadaceae;Pseudomonas;Pseudomonas_sp_JV551A1	0	637	486	806	1519	3998	2090	2086	0	0.00120945	0.000921951	0.00153002	0.00233305	0.00588917	0.0037838	0.0039922
Bacteria;Proteobacteria;Gammaproteobacteria;Pseudomonadales;Moraxellaceae;Psychrobacter;Psychrobacter_sp_JCM_18903	0	0	9	10000	9	1	32	0	0	0	1.70732e-05	0.0189829	1.38232e-05	1.47303e-06	5.79338e-05	0
Bacteria;Proteobacteria;Gammaproteobacteria;Enterobacterales;Yersiniaceae;Yersinia;Yersinia_enterocolitica	4	461.5	5910	550	0	57	247	2612	7.00833e-06	0.000876234	0.0112114	0.00104406	0	8.39627e-05	0.000447176	0.00499887
Bacteria;Firmicutes;Clostridia;Clostridiales;Clostridiaceae;Clostridium;Clostridium_perfringens	0	0	69	9725	0	0	0	0	0	0	0.000130894	0.0184609	0	0	0	0
Bacteria;Proteobacteria;Gammaproteobacteria;Enterobacterales;Enterobacteriaceae;Citrobacter;Citrobacter_braakii	0	562.5	7222	135	25	2	7	1728	0	0.001068	0.0137003	0.000256269	3.83977e-05	2.94606e-06	1.2673e-05	0.00330706
Bacteria;Proteobacteria;Gammaproteobacteria;Pseudomonadales;Pseudomonadaceae;Pseudomonas;Pseudomonas_syringae_group_genomosp_3	1942	1721	221	3356	781	410	1042	608	0.00340254	0.0032676	0.000419241	0.00637067	0.00119955	0.000603942	0.00188647	0.0011636
Bacteria;Proteobacteria;Gammaproteobacteria;Pseudomonadales;Moraxellaceae;Psychrobacter;Psychrobacter_sp_P11G5	0	0	12	9567.5	13	0	34	3	0	0	2.27642e-05	0.0181619	1.99668e-05	0	6.15546e-05	5.74142e-06
Bacteria;Firmicutes;Bacilli;Lactobacillales;Carnobacteriaceae;Marinilactibacillus;Marinilactibacillus_psychrotolerans	210	2353	0	6529	0	0	1	0	0.000367937	0.00446756	0	0.012394	0	0	1.81043e-06	0
Bacteria;Actinobacteria;Actinobacteria;Micrococcales;Microbacteriaceae;Curtobacterium;Curtobacterium_sp_ER1/6	841	3016	277	1472	3345	0	0	612	0.0014735	0.00572637	0.000525474	0.00279429	0.00513762	0	0	0.00117125
Bacteria;Proteobacteria;Gammaproteobacteria;Pseudomonadales;Moraxellaceae;Moraxella;Moraxella_canis	0	0	36	8684	20	1	8	10	0	0	6.82927e-05	0.0164848	3.07182e-05	1.47303e-06	1.44834e-05	1.91381e-05
Bacteria;Proteobacteria;Gammaproteobacteria;Pseudomonadales;Moraxellaceae;Psychrobacter;Psychrobacter_piscatorii	0	0	84.5	8381	195	4.5	52	1	0	0	0.000160298	0.0159096	0.000299502	6.62863e-06	9.41423e-05	1.91381e-06
Bacteria;Proteobacteria;Gammaproteobacteria;Pseudomonadales;Pseudomonadaceae;Pseudomonas;Pseudomonas_fragi	0	762.5	0	7688	0	0	112	87	0	0.00144773	0	0.0145941	0	0	0.000202768	0.000166501
Bacteria;Proteobacteria;Gammaproteobacteria;Pseudomonadales;Moraxellaceae;Psychrobacter;Psychrobacter_pasteurii	0	0	87	8442	71	0	22	4	0	0	0.000165041	0.0160254	0.00010905	0	3.98295e-05	7.65523e-06
Bacteria;Proteobacteria;Gammaproteobacteria;Enterobacterales;Enterobacteriaceae;Escherichia;Escherichia_sp_TW09308	1817	1039	0	39	1089	5152	0	896	0.00318353	0.00197271	0	7.40334e-05	0.00167261	0.00758905	0	0.00171477
Bacteria;Proteobacteria;Gammaproteobacteria;Pseudomonadales;Pseudomonadaceae;Pseudomonas;Pseudomonas_amygdali	187	1434	291	1566	1400	2980	395	1107	0.000327639	0.00272268	0.000552032	0.00297273	0.00215027	0.00438963	0.00071512	0.00211859
Bacteria;Proteobacteria;Gammaproteobacteria;Pseudomonadales;Moraxellaceae;Psychrobacter;Psychrobacter_sp_JB385	0	0	151	8059	132	1	44	9	0	0	0.00028645	0.0152983	0.00020274	1.47303e-06	7.96589e-05	1.72243e-05
Bacteria;Firmicutes;Bacilli;Lactobacillales;Carnobacteriaceae;Pisciglobus;Pisciglobus_halotolerans	0	0	4	8137	0	0	3	0	0	0	7.58807e-06	0.0154464	0	0	5.43129e-06	0
Bacteria;Proteobacteria;Gammaproteobacteria;Pseudomonadales;Pseudomonadaceae;Pseudomonas;Pseudomonas_resinovorans	0	0	6216	0	0	0	0	1764	0	0	0.0117919	0	0	0	0	0.00337596
Bacteria;Proteobacteria;Gammaproteobacteria;Pseudomonadales;Moraxellaceae;Psychrobacter;Psychrobacter_sp_FDAARGOS_221	0	0	19	7872	13	1	58	2	0	0	3.60434e-05	0.0149434	1.99668e-05	1.47303e-06	0.000105005	3.82762e-06
Bacteria;Proteobacteria;Gammaproteobacteria;Pseudomonadales;Moraxellaceae;Psychrobacter;Psychrobacter_fozii	0	0	12	7807	21	0	41	14	0	0	2.27642e-05	0.01482	3.22541e-05	0	7.42276e-05	2.67933e-05
Bacteria;Proteobacteria;Gammaproteobacteria;Pseudomonadales;Moraxellaceae;Acinetobacter;Acinetobacter_bohemicus	24	4469.5	4	3362	3	0	0	17	4.205e-05	0.00848608	7.58807e-06	0.00638206	4.60773e-06	0	0	3.25347e-05
Bacteria;Proteobacteria;Gammaproteobacteria;Pseudomonadales;Moraxellaceae;Psychrobacter;Psychrobacter_sp_ENNN9_III	0	0	7	7810	17.5	0	36	3	0	0	1.32791e-05	0.0148257	2.68784e-05	0	6.51755e-05	5.74142e-06
Bacteria;Actinobacteria;Actinobacteria;Micrococcales;Micrococcaceae;Kocuria;Kocuria_sp_WRN011	0	0	253	6374	23.5	11	1267	5	0	0	0.000479946	0.0120997	3.60939e-05	1.62033e-05	0.00229381	9.56904e-06
Bacteria;Firmicutes;Bacilli;Lactobacillales;Aerococcaceae;Aerococcus;Aerococcus_urinaeequi	449.5	5235	0	2196	0	0	0	0	0.000787561	0.00993951	0	0.00416865	0	0	0	0
Bacteria;Proteobacteria;Gammaproteobacteria;Pseudomonadales;Moraxellaceae;Psychrobacter;Psychrobacter_phenylpyruvicus	0	0	28	7630	24	1	110	16	0	0	5.31165e-05	0.014484	3.68618e-05	1.47303e-06	0.000199147	3.06209e-05
Bacteria;Proteobacteria;Gammaproteobacteria;Pseudomonadales;Moraxellaceae;Psychrobacter;Psychrobacter_sp_AntiMn-1	0	0	238	7229	172	1	0	1	0	0	0.00045149	0.0137228	0.000264176	1.47303e-06	0	1.91381e-06
Bacteria;Proteobacteria;Gammaproteobacteria;Pseudomonadales;Moraxellaceae;Psychrobacter;Psychrobacter_arcticus	0	0	21	7529	9.5	0	0	3	0	0	3.98374e-05	0.0142922	1.45911e-05	0	0	5.74142e-06
Bacteria;Proteobacteria;Gammaproteobacteria;Pseudomonadales;Moraxellaceae;Psychrobacter;Psychrobacter_sp_Marseille-P5312	0	0	32	7107	28	3	84	8	0	0	6.07046e-05	0.0134912	4.30055e-05	4.41909e-06	0.000152076	1.53105e-05
Bacteria;Proteobacteria;Gammaproteobacteria;Pseudomonadales;Pseudomonadaceae;Pseudomonas;Pseudomonas_syringae	22	1012	1077	4596	0	0	16	382	3.85458e-05	0.00192145	0.00204309	0.00872455	0	0	2.89669e-05	0.000731075
Bacteria;Actinobacteria;Actinobacteria;Micrococcales;Micrococcaceae;Kocuria;Kocuria_rhizophila	0	0	223.5	5713	40.5	13	1157	3	0	0	0.000423984	0.0108449	6.22043e-05	1.91494e-05	0.00209467	5.74142e-06
Bacteria;Firmicutes;Bacilli;Lactobacillales;Lactobacillaceae;Lactobacillus;Lactobacillus_plantarum	1053	1813	140	282	738	1633	1209	797	0.00184494	0.00344228	0.000265583	0.000535318	0.0011335	0.00240546	0.00218881	0.0015253
Bacteria;Proteobacteria;Betaproteobacteria;Burkholderiales;Comamonadaceae;Hydrogenophaga;Hydrogenophaga_sp_T4	18	287	464	576	540	3474	2058	406	3.15375e-05	0.000544917	0.000880217	0.00109342	0.000829391	0.00511731	0.00372586	0.000777006
Bacteria;Proteobacteria;Gammaproteobacteria;Enterobacterales;Enterobacteriaceae;Enterobacter;Enterobacter_sp_NFR05	0	0	5050	0	0	0	0	1784	0	0	0.00957994	0	0	0	0	0.00341423
Bacteria;Proteobacteria;Gammaproteobacteria;Pseudomonadales;Moraxellaceae;Psychrobacter;Psychrobacter_sp_P2G3	0	0	178	6499	135	0	35	1	0	0	0.000337669	0.012337	0.000207348	0	6.3365e-05	1.91381e-06
Bacteria;Proteobacteria;Gammaproteobacteria;Oceanospirillales;Alcanivoracaceae;Alcanivorax;Alcanivorax_pacificus	2078	0	0	200	1908	2545	982	0	0.00364082	0	0	0.000379659	0.00293052	0.00374886	0.00177784	0
Bacteria;Proteobacteria;Gammaproteobacteria;Enterobacterales;Enterobacteriaceae;Pluralibacter;Pluralibacter_gergoviae	382	203	4986	175	0	0	0	841	0.000669295	0.000385429	0.00945854	0.000332201	0	0	0	0.00160951
Bacteria;Proteobacteria;Gammaproteobacteria;Enterobacterales;Yersiniaceae;Serratia;Serratia_liquefaciens	216	251	2283	1080	729	661	224	1336	0.00037845	0.000476565	0.00433089	0.00205016	0.00111968	0.000973673	0.000405536	0.00255685
Bacteria;Proteobacteria;Gammaproteobacteria;Pseudomonadales;Moraxellaceae;Moraxella;Moraxella_osloensis	0	0	58	6338	6	0	7	0	0	0	0.000110027	0.0120314	9.21546e-06	0	1.2673e-05	0
Bacteria;Proteobacteria;Gammaproteobacteria;Enterobacterales;Enterobacteriaceae;Lelliottia;Lelliottia_amnigena	14	2159	76.5	2387	1417	0	295	315	2.45291e-05	0.00409922	0.000145122	0.00453122	0.00217638	0	0.000534077	0.000602849
Bacteria;Proteobacteria;Gammaproteobacteria;Enterobacterales;Pectobacteriaceae;Lonsdalea;Lonsdalea_britannica	0	6228	0	0	10	0	0	0	0	0.0118249	0	0	1.53591e-05	0	0	0
Bacteria;Proteobacteria;Gammaproteobacteria;Pseudomonadales;Moraxellaceae;Alkanindiges;Alkanindiges_illinoisensis	0	202	0	6019	4	0	6	0	0	0.00038353	0	0.0114258	6.14364e-06	0	1.08626e-05	0
Bacteria;Proteobacteria;Gammaproteobacteria;Enterobacterales;Enterobacteriaceae;Enterobacteriaceae_noname;Type-D_symbiont_of_Plautia_stali	0	0	5	6097	0	0	0	0	0	0	9.48509e-06	0.0115739	0	0	0	0
Bacteria;Proteobacteria;Gammaproteobacteria;Pseudomonadales;Moraxellaceae;Psychrobacter;Psychrobacter_sp_JCM_18900	0	0	12	5980	6	0	2	6	0	0	2.27642e-05	0.0113518	9.21546e-06	0	3.62086e-06	1.14828e-05
Bacteria;Proteobacteria;Gammaproteobacteria;Enterobacterales;Enterobacteriaceae;Citrobacter;Citrobacter_amalonaticus	8	853	1604	128	460	867	317	1996	1.40167e-05	0.00161956	0.00304282	0.000242981	0.000706518	0.00127712	0.000573906	0.00381996
Bacteria;Proteobacteria;Gammaproteobacteria;Enterobacterales;Enterobacteriaceae;Buttiauxella;Buttiauxella_gaviniae	0	0	3759	0	0	0	0	2072	0	0	0.00713089	0	0	0	0	0.00396541
Bacteria;Proteobacteria;Gammaproteobacteria;Pseudomonadales;Moraxellaceae;Psychrobacter;Psychrobacter_sp_B29-1	0	0	3	5582	9	0	18	2	0	0	5.69106e-06	0.0105963	1.38232e-05	0	3.25877e-05	3.82762e-06
Bacteria;Proteobacteria;Betaproteobacteria;Burkholderiales;Alcaligenaceae;Bordetella;Bordetella_pertussis	92	1625.5	722	2802	97	0	57	217	0.000161191	0.00308628	0.00136965	0.00531902	0.000148983	0	0.000103194	0.000415296
Bacteria;Proteobacteria;Gammaproteobacteria;Pseudomonadales;Moraxellaceae;Acinetobacter;Acinetobacter_lwoffii	0	3840	0	1552	101	0	0	14	0	0.00729087	0	0.00294615	0.000155127	0	0	2.67933e-05
Bacteria;Actinobacteria;Actinobacteria;Micrococcales;Micrococcaceae;Kocuria;Kocuria_carniphila	0	0	216.5	4219	16.5	21	1013	6	0	0	0.000410705	0.0080089	2.53425e-05	3.09336e-05	0.00183397	1.14828e-05
Bacteria;Proteobacteria;Gammaproteobacteria;Enterobacterales;Yersiniaceae;Serratia;Serratia_quinivorans	0	224	3485	1027	25	53	43	547	0	0.000425301	0.00661111	0.00194955	3.83977e-05	7.80706e-05	7.78485e-05	0.00104685
Bacteria;Proteobacteria;Alphaproteobacteria;Rhodospirillales;Rhodospirillales_noname;Enhydrobacter;Enhydrobacter_aerosaccus	0	0	10	5260	22	1	1	9	0	0	1.89702e-05	0.00998502	3.379e-05	1.47303e-06	1.81043e-06	1.72243e-05
Bacteria;Proteobacteria;Gammaproteobacteria;Pseudomonadales;Moraxellaceae;Psychrobacter;Psychrobacter_proteolyticus	0	0	7	5065	10	0	5	0	0	0	1.32791e-05	0.00961485	1.53591e-05	0	9.05215e-06	0
Bacteria;Proteobacteria;Gammaproteobacteria;Pseudomonadales;Moraxellaceae;Acinetobacter;Acinetobacter_albensis	0	1255	0	3754	0	0	0	0	0	0.00238282	0	0.00712619	0	0	0	0
Bacteria;Proteobacteria;Gammaproteobacteria;Enterobacterales;Morganellaceae;Providencia;Providencia_rettgeri	0	71	0	4794	34	7	41	62	0	0.000134805	0	0.00910041	5.22209e-05	1.03112e-05	7.42276e-05	0.000118656
Bacteria;Proteobacteria;Gammaproteobacteria;Enterobacterales;Enterobacteriaceae;Enterobacter;Enterobacter_sp_FY-07	0	39	3261	62	567	534	0	749	0	7.40479e-05	0.00618618	0.000117694	0.000870861	0.000786598	0	0.00143344
Bacteria;Proteobacteria;Gammaproteobacteria;Pseudomonadales;Moraxellaceae;Psychrobacter;Psychrobacter_nivimaris	0	0	52	4686	45	3	6	0	0	0	9.8645e-05	0.0088954	6.91159e-05	4.41909e-06	1.08626e-05	0
Bacteria;Proteobacteria;Gammaproteobacteria;Pseudomonadales;Moraxellaceae;Psychrobacter;Psychrobacter_pacificensis	0	0	93	4545	67	1	25	0	0	0	0.000176423	0.00862774	0.000102906	1.47303e-06	4.52607e-05	0
Bacteria;Firmicutes;Bacilli;Lactobacillales;Aerococcaceae;Aerococcus;Aerococcus_sp_HMSC10H05	480.5	4260	0	2	0	0	0	0	0.000841875	0.00808831	0	3.79659e-06	0	0	0	0
Bacteria;Proteobacteria;Gammaproteobacteria;Vibrionales;Vibrionaceae;Photobacterium;Photobacterium_profundum	0	0	3704	0	0	0	0	954	0	0	0.00702656	0	0	0	0	0.00182577
Bacteria;Firmicutes;Bacilli;Lactobacillales;Carnobacteriaceae;Desemzia;Desemzia_incerta	0	0	0	4599	0	0	4	0	0	0	0	0.00873025	0	0	7.24172e-06	0
Bacteria;Proteobacteria;Gammaproteobacteria;Enterobacterales;Enterobacteriaceae;Buttiauxella;Buttiauxella_sp_3AFRM03	0	0	3874	46	0	0	0	670	0	0	0.00734905	8.73215e-05	0	0	0	0.00128225
Bacteria;Firmicutes;Bacilli;Lactobacillales;Carnobacteriaceae;Alkalibacterium;Alkalibacterium_pelagium	387	4224	0	0	0	1	0	0	0.000678055	0.00801996	0	0	0	1.47303e-06	0	0
Bacteria;Proteobacteria;Gammaproteobacteria;Enterobacterales;Morganellaceae;Providencia;Providencia_rustigianii	191	24	0	34	25	5509	53	0	0.000334648	4.55679e-05	0	6.45419e-05	3.83977e-05	0.00811492	9.59528e-05	0
Bacteria;Firmicutes;Bacilli;Lactobacillales;Streptococcaceae;Lactococcus;Lactococcus_petauri	0	0	3559	0	0	0	0	992	0	0	0.00675149	0	0	0	0	0.0018985
Bacteria;Firmicutes;Bacilli;Lactobacillales;Streptococcaceae;Streptococcus;Streptococcus_pneumoniae	258	1250	261	239	1092	696	584	532	0.000452037	0.00237333	0.000495122	0.000453692	0.00167721	0.00102523	0.00105729	0.00101815
Bacteria;Proteobacteria;Gammaproteobacteria;Enterobacterales;Enterobacteriaceae;Klebsiella;Klebsiella_michiganensis	30	2445	101	122	8	0	1	1716.5	5.25624e-05	0.00464223	0.000191599	0.000231592	1.22873e-05	0	1.81043e-06	0.00328505
Bacteria;Firmicutes;Bacilli;Lactobacillales;Streptococcaceae;Lactococcus;Lactococcus_sp_DD01	0	0	3321	0	0	0	0	1081	0	0	0.0063	0	0	0	0	0.00206883
Bacteria;Proteobacteria;Gammaproteobacteria;Pseudomonadales;Moraxellaceae;Psychrobacter;Psychrobacter_sp_Cmf_222	0	0	8	4303	26	0	4	0	0	0	1.51761e-05	0.00816835	3.99336e-05	0	7.24172e-06	0
Bacteria;Proteobacteria;Alphaproteobacteria;Rhizobiales;Rhizobiaceae;Rhizobium;Rhizobium_etli	0	50	20	4220	13	0	0	17	0	9.49332e-05	3.79404e-05	0.00801079	1.99668e-05	0	0	3.25347e-05
Bacteria;Proteobacteria;Gammaproteobacteria;Enterobacterales;Erwiniaceae;Pantoea;Pantoea_sp_YR343	0	0	2708	764	0	0	6	752	0	0	0.00513713	0.0014503	0	0	1.08626e-05	0.00143918
Bacteria;Proteobacteria;Gammaproteobacteria;Enterobacterales;Enterobacteriaceae;Enterobacteriaceae_noname;Enterobacteriaceae_bacterium_strain_FGI_57	0	0	2191	0	502	0	0	1559.5	0	0	0.00415637	0	0.000771027	0	0	0.00298458
Bacteria;Firmicutes;Bacilli;Bacillales;Listeriaceae;Brochothrix;Brochothrix_campestris	0	0	0	4080	0	0	3	0	0	0	0	0.00774503	0	0	5.43129e-06	0
Bacteria;Proteobacteria;Gammaproteobacteria;Enterobacterales;Pectobacteriaceae;Pectobacterium;Pectobacterium_carotovorum	0	54	1631	1827	79	5	35	445	0	0.000102528	0.00309404	0.00346818	0.000121337	7.36515e-06	6.3365e-05	0.000851644
Bacteria;Proteobacteria;Gammaproteobacteria;Pseudomonadales;Pseudomonadaceae;Pseudomonas;Pseudomonas_sp_22_E_5	8	396	172	3361	2	0	11	87	1.40167e-05	0.000751871	0.000326287	0.00638016	3.07182e-06	0	1.99147e-05	0.000166501
Bacteria;Firmicutes;Bacilli;Lactobacillales;Enterococcaceae;Vagococcus;Vagococcus_elongatus	44	1926	709	0	323	994	100	196	7.70916e-05	0.00365683	0.00134499	0	0.000496099	0.00146419	0.000181043	0.000375106
Bacteria;Firmicutes;Bacilli;Lactobacillales;Carnobacteriaceae;Carnobacterium;Carnobacterium_sp_1290_CSPC	332	3639	0	0	0.5	0	0	0	0.000581691	0.00690924	0	0	7.67955e-07	0	0	0
Bacteria;Bacteria_noname;Bacteria_noname;Bacteria_noname;Bacteria_noname;Bacteria_noname;bacterium_ADurbBin374	701	22	0	267	816	1632	1052	0	0.00122821	4.17706e-05	0	0.000506844	0.0012533	0.00240398	0.00190457	0
Bacteria;Proteobacteria;Gammaproteobacteria;Pseudomonadales;Moraxellaceae;Psychrobacter;Psychrobacter_sanguinis	0	0	6	3817	10	0	18	3	0	0	1.13821e-05	0.00724578	1.53591e-05	0	3.25877e-05	5.74142e-06
Bacteria;Firmicutes;Bacilli;Lactobacillales;Carnobacteriaceae;Jeotgalibaca;Jeotgalibaca_sp_H21T32	81	846	0	2804	0	1	0	0	0.000141919	0.00160627	0	0.00532281	0	1.47303e-06	0	0
Bacteria;Proteobacteria;Gammaproteobacteria;Enterobacterales;Enterobacteriaceae;Kluyvera;Kluyvera_ascorbata	0	26	1032	945	0	0	0	1666.5	0	4.93653e-05	0.00195772	0.00179389	0	0	0	0.00318936
Bacteria;Proteobacteria;Gammaproteobacteria;Xanthomonadales;Xanthomonadaceae;Xanthomonas;Xanthomonas_citri	304	97	50	472	664	1317	213	997	0.000532633	0.00018417	9.48509e-05	0.000895994	0.00101984	0.00193998	0.000385622	0.00190807
Bacteria;Proteobacteria;Betaproteobacteria;Burkholderiales;Burkholderiaceae;Cupriavidus;Cupriavidus_oxalaticus	401	667	0	215	706	1241	916	6	0.000702585	0.00126641	0	0.000408133	0.00108435	0.00182803	0.00165835	1.14828e-05
Bacteria;Actinobacteria;Actinobacteria;Corynebacteriales;Nocardiaceae;Rhodococcus;Rhodococcus_qingshengii	500	507	277	42	574	460	1313	271	0.000876041	0.000962623	0.000525474	7.97283e-05	0.000881612	0.000677594	0.00237709	0.000518642
Bacteria;Proteobacteria;Gammaproteobacteria;Enterobacterales;Enterobacteriaceae;Enterobacter;Enterobacter_mori	0	3487	0	93	46	0	0	11	0	0.00662064	0	0.000176541	7.06518e-05	0	0	2.10519e-05
Bacteria;Proteobacteria;Gammaproteobacteria;Enterobacterales;Morganellaceae;Proteus;Proteus_mirabilis	836	0	1912	0	510	0	0	474	0.00146474	0	0.0036271	0	0.000783314	0	0	0.000907145
Bacteria;Proteobacteria;Gammaproteobacteria;Enterobacterales;Budviciaceae;Budvicia;Budvicia_aquatica	0	0	2918	0	0	0	0	641	0	0	0.0055355	0	0	0	0	0.00122675
Bacteria;Firmicutes;Bacilli;Lactobacillales;Enterococcaceae;Enterococcus;Enterococcus_casseliflavus	0	0	0	3558	0	0	0	0	0	0	0	0.00675412	0	0	0	0
Bacteria;Firmicutes;Bacilli;Lactobacillales;Carnobacteriaceae;Carnobacterium;Carnobacterium_funditum	0	0	0	3554	0	0	0	0	0	0	0	0.00674653	0	0	0	0
Bacteria;Proteobacteria;Gammaproteobacteria;Enterobacterales;Hafniaceae;Edwardsiella;Edwardsiella_tarda	0	0	2410	221	6	0	0	825	0	0	0.00457182	0.000419523	9.21546e-06	0	0	0.00157889
Bacteria;Proteobacteria;Gammaproteobacteria;Enterobacterales;Enterobacteriaceae;Citrobacter;Citrobacter_sp_MGH106	0	0	2833	35	0	0	0	483	0	0	0.00537425	6.64402e-05	0	0	0	0.000924369
Bacteria;Firmicutes;Bacilli;Lactobacillales;Carnobacteriaceae;Jeotgalibaca;Jeotgalibaca_dankookensis	0	0	0	3346	0	0	0	0	0	0	0	0.00635169	0	0	0	0
Bacteria;Proteobacteria;Gammaproteobacteria;Pseudomonadales;Moraxellaceae;Acinetobacter;Acinetobacter_johnsonii	75	1539	11	1633	28	0	3	30	0.000131406	0.00292204	2.08672e-05	0.00309991	4.30055e-05	0	5.43129e-06	5.74142e-05
Bacteria;Firmicutes;Clostridia;Clostridiales;Lachnospiraceae;Faecalicatena;Faecalicatena_orotica	0	0	0	3287	0	0	0	0	0	0	0	0.00623969	0	0	0	0
Bacteria;Firmicutes;Bacilli;Lactobacillales;Carnobacteriaceae;Alkalibacterium;Alkalibacterium_gilvum	21	174	0	3076	0	0	0	0	3.67937e-05	0.000330368	0	0.00583915	0	0	0	0
Bacteria;Proteobacteria;Gammaproteobacteria;Enterobacterales;Yersiniaceae;Serratia;Serratia_odorifera	0	15	1913	904	7	0	0	426	0	2.848e-05	0.003629	0.00171606	1.07514e-05	0	0	0.000815282
Bacteria;Proteobacteria;Gammaproteobacteria;Enterobacterales;Enterobacteriaceae;Klebsiella;Klebsiella_grimontii	27	1214	858	598	6	0	0	560	4.73062e-05	0.00230498	0.00162764	0.00113518	9.21546e-06	0	0	0.00107173
Bacteria;Proteobacteria;Gammaproteobacteria;Vibrionales;Vibrionaceae;Vibrio;Vibrio_antiquarius	656	0	125	116	571	638	1128	371	0.00114937	0	0.000237127	0.000220202	0.000877004	0.000939793	0.00204216	0.000710023
Bacteria;Firmicutes;Bacilli;Lactobacillales;Carnobacteriaceae;Carnobacterium;Carnobacterium_jeotgali	0	0	0	3225	0	0	0	0	0	0	0	0.00612199	0	0	0	0
Bacteria;Proteobacteria;Gammaproteobacteria;Pseudomonadales;Moraxellaceae;Acinetobacter;Acinetobacter_puyangensis	0	0	8	3148	0	0	0	2	0	0	1.51761e-05	0.00597582	0	0	0	3.82762e-06
Bacteria;Actinobacteria;Actinobacteria;Corynebacteriales;Mycobacteriaceae;Mycobacteroides;Mycobacteroides_abscessus	623	174	2	1108	657	975	8	0	0.00109155	0.000330368	3.79404e-06	0.00210331	0.00100909	0.0014362	1.44834e-05	0
Bacteria;Proteobacteria;Gammaproteobacteria;Enterobacterales;Enterobacteriaceae;Raoultella;Raoultella_sp_BIGb0149	54	2952	0	0	0	0	0	144	9.46124e-05	0.00560486	0	0	0	0	0	0.000275588
Bacteria;Proteobacteria;Gammaproteobacteria;Pseudomonadales;Moraxellaceae;Acinetobacter;Acinetobacter_indicus	17	1644.5	13	1381	48	2	34	0	2.97854e-05	0.00312235	2.46612e-05	0.00262154	7.37237e-05	2.94606e-06	6.15546e-05	0
Bacteria;Proteobacteria;Gammaproteobacteria;Pseudomonadales;Moraxellaceae;Psychrobacter;Psychrobacter_sp_JCM_18902	0	12	0	3100	2	0	1	0	0	2.2784e-05	0	0.00588471	3.07182e-06	0	1.81043e-06	0
Bacteria;Proteobacteria;Gammaproteobacteria;Pseudomonadales;Moraxellaceae;Psychrobacter;Psychrobacter_sp_Choline-3u-12	0	0	3	3027	0	0	1	0	0	0	5.69106e-06	0.00574613	0	0	1.81043e-06	0
Bacteria;Proteobacteria;Gammaproteobacteria;Enterobacterales;Enterobacteriaceae;Enterobacter;Enterobacter_sp_OV724	0	1779	0	1233	0	0	0	3	0	0.00337772	0	0.00234059	0	0	0	5.74142e-06
Bacteria;Gemmatimonadetes;Gemmatimonadetes_noname;Gemmatimonadetes_noname;Gemmatimonadetes_noname;Gemmatimonadetes_noname;Gemmatimonadetes_bacterium_GWC2_71_9	0	0	176	109	482	812	1086	661	0	0	0.000333875	0.000206914	0.000740308	0.0011961	0.00196613	0.00126503
Bacteria;Firmicutes;Bacilli;Lactobacillales;Carnobacteriaceae;Carnobacterium;Carnobacterium_alterfunditum	0	0	0	2985	0	0	0	0	0	0	0	0.0056664	0	0	0	0
Bacteria;Firmicutes;Bacilli;Lactobacillales;Lactobacillaceae;Lactobacillus;Lactobacillus_sp_54-5	34	944	237	6	248	1614	115	104	5.95708e-05	0.00179234	0.000449593	1.13898e-05	0.000380906	0.00237747	0.000208199	0.000199036
Bacteria;Firmicutes;Bacilli;Lactobacillales;Aerococcaceae;Facklamia;Facklamia_tabacinasalis	4	71	0	2787	0	0	0	0	7.00833e-06	0.000134805	0	0.00529054	0	0	0	0
Bacteria;Firmicutes;Bacilli;Bacillales;Bacillaceae;Bacillus;Bacillus_subtilis	0	0	0	2845	0	0	0	0	0	0	0	0.00540064	0	0	0	0
Bacteria;Firmicutes;Bacilli;Lactobacillales;Enterococcaceae;Vagococcus;Vagococcus_fessus	0	0	0	2843	0	0	0	0	0	0	0	0.00539685	0	0	0	0
Bacteria;Proteobacteria;Gammaproteobacteria;Enterobacterales;Hafniaceae;Hafnia;Hafnia_sp_HMSC23F03	0	0	2184	0	17	0	0	594	0	0	0.00414309	0	2.61105e-05	0	0	0.0011368
Bacteria;Firmicutes;Bacilli;Lactobacillales;Enterococcaceae;Enterococcus;Enterococcus_termitis	0	0	0	2728	0	0	0	0	0	0	0	0.00517854	0	0	0	0
Bacteria;Proteobacteria;Gammaproteobacteria;Pseudomonadales;Moraxellaceae;Acinetobacter;Acinetobacter_pittii	0	498	0	817	810	872	4	0	0	0.000945535	0	0.00155091	0.00124409	0.00128448	7.24172e-06	0
Bacteria;Proteobacteria;Gammaproteobacteria;Enterobacterales;Erwiniaceae;Pantoea;Pantoea_sp_CCBC3-3-1	0	0	0	2613	0	0	0	13	0	0	0	0.00496024	0	0	0	2.48795e-05
Bacteria;Proteobacteria;Gammaproteobacteria;Enterobacterales;Erwiniaceae;Erwinia;Erwinia_persicina	0	0	0	2610	0	0	0	12	0	0	0	0.00495454	0	0	0	2.29657e-05
Bacteria;Proteobacteria;Gammaproteobacteria;Enterobacterales;Hafniaceae;Edwardsiella;Edwardsiella_ictaluri	74	305	1855	0	10	0	0	378	0.000129654	0.000579093	0.00351897	0	1.53591e-05	0	0	0.000723419
Bacteria;Proteobacteria;Gammaproteobacteria;Enterobacterales;Yersiniaceae;Rahnella;Rahnella_sp_ERMR1:05	0	1833	306	0	0	0	355	79	0	0.00348025	0.000580488	0	0	0	0.000642703	0.000151191
Bacteria;Firmicutes;Bacilli;Lactobacillales;Aerococcaceae;Globicatella;Globicatella_sanguinis	102	2185	14	0	29	12	220	7	0.000178712	0.00414858	2.65583e-05	0	4.45414e-05	1.76764e-05	0.000398295	1.33967e-05
Bacteria;Actinobacteria;Actinobacteria;Propionibacteriales;Propionibacteriaceae;Cutibacterium;Cutibacterium_acnes	0	0	657	0	0	0	0	1823	0	0	0.00124634	0	0	0	0	0.00348887
Bacteria;Proteobacteria;Gammaproteobacteria;Enterobacterales;Enterobacteriaceae;Enterobacillus;Enterobacillus_tribolii	0	0	2125	12	0	0	0	348	0	0	0.00403116	2.27795e-05	0	0	0	0.000666005
Bacteria;Proteobacteria;Alphaproteobacteria;Rhizobiales;Rhizobiaceae;Agrobacterium;Agrobacterium_genomosp_3	677	387	126	0	406	0	626	387	0.00118616	0.000734783	0.000239024	0	0.000623579	0	0.00113333	0.000740644
Bacteria;Proteobacteria;Gammaproteobacteria;Enterobacterales;Enterobacteriaceae;Escherichia;Escherichia_sp_E4742	130	409	0	50	1164	0	1	869	0.000227771	0.000776554	0	9.49146e-05	0.0017878	0	1.81043e-06	0.0016631
Bacteria;Proteobacteria;Gammaproteobacteria;Enterobacterales;Yersiniaceae;Yersinia;Yersinia_frederiksenii	3	172	1569	3	8	60	328	283	5.25624e-06	0.00032657	0.00297642	5.69488e-06	1.22873e-05	8.83818e-05	0.000593821	0.000541608
Bacteria;Proteobacteria;Gammaproteobacteria;Enterobacterales;Erwiniaceae;Erwinia;Erwinia_tracheiphila	375	988	0	14	433	893	0	0	0.00065703	0.00187588	0	2.65761e-05	0.000665049	0.00131542	0	0
Bacteria;Proteobacteria;Gammaproteobacteria;Pseudomonadales;Pseudomonadaceae;Pseudomonas;Pseudomonas_sp	0	119	0	2248	1	0	14	4	0	0.000225941	0	0.00426736	1.53591e-06	0	2.5346e-05	7.65523e-06
Bacteria;Proteobacteria;Gammaproteobacteria;Pseudomonadales;Moraxellaceae;Acinetobacter;Acinetobacter_sp_TTH0-4	0	247	0	2127	0	0	0	0	0	0.00046897	0	0.00403767	0	0	0	0
Bacteria;Proteobacteria;Gammaproteobacteria;Pseudomonadales;Moraxellaceae;Psychrobacter;Psychrobacter_sp_YP14	0	0	1	2353	0	0	9	0	0	0	1.89702e-06	0.00446668	0	0	1.62939e-05	0
Bacteria;Proteobacteria;Gammaproteobacteria;Enterobacterales;Yersiniaceae;Serratia;Serratia_plymuthica	0	442	28	0	1300	1004	0	0	0	0.00083921	5.31165e-05	0	0.00199668	0.00147892	0	0
Bacteria;Firmicutes;Bacilli;Lactobacillales;Streptococcaceae;Streptococcus;Streptococcus_suis	52	204	0	0	8	2487	46	0	9.11082e-05	0.000387328	0	0	1.22873e-05	0.00366343	8.32798e-05	0
Bacteria;Proteobacteria;Gammaproteobacteria;Enterobacterales;Enterobacteriaceae;Enterobacter;Enterobacter_sp_kpr-6	0	1850	0	238.5	106.5	0	0	44	0	0.00351253	0	0.000452743	0.000163574	0	0	8.42075e-05
Bacteria;Firmicutes;Bacilli;Lactobacillales;Carnobacteriaceae;Trichococcus;Trichococcus_collinsii	172	1817	0	199	0	0	0	0	0.000301358	0.00344987	0	0.00037776	0	0	0	0
Bacteria;Proteobacteria;Gammaproteobacteria;Enterobacterales;Erwiniaceae;Pantoea;Pantoea_allii	0	0	133	2034	1	0	0	0	0	0	0.000252303	0.00386113	1.53591e-06	0	0	0
Bacteria;Proteobacteria;Gammaproteobacteria;Enterobacterales;Enterobacteriaceae;Atlantibacter;Atlantibacter_hermannii	0	1810	36	150	161.5	0	0	0	0	0.00343658	6.82927e-05	0.000284744	0.000248049	0	0	0
Bacteria;Proteobacteria;Gammaproteobacteria;Enterobacterales;Enterobacteriaceae;Escherichia;Escherichia_sp_TW14182	189	0	2	0	402	0	0	1558	0.000331143	0	3.79404e-06	0	0.000617436	0	0	0.00298171
Bacteria;Firmicutes;Bacilli;Lactobacillales;Carnobacteriaceae;Carnobacterium;Carnobacterium_viridans	0	0	5	2056	0.5	0	2	0	0	0	9.48509e-06	0.00390289	7.67955e-07	0	3.62086e-06	0
Bacteria;Proteobacteria;Gammaproteobacteria;Pseudomonadales;Moraxellaceae;Moraxella;Moraxella_bovis	0	0	0	2038	26	0	0	0	0	0	0	0.00386872	3.99336e-05	0	0	0
Bacteria;Proteobacteria;Gammaproteobacteria;Enterobacterales;Enterobacteriaceae;Citrobacter;Citrobacter_portucalensis	0	297	930.5	5	3	0	17	785.5	0	0.000563903	0.00176518	9.49146e-06	4.60773e-06	0	3.07773e-05	0.0015033
Bacteria;Proteobacteria;Gammaproteobacteria;Pseudomonadales;Pseudomonadaceae;Pseudomonas;Pseudomonas_entomophila	0	0	1981	0	0	0	0	53	0	0	0.00375799	0	0	0	0	0.000101432
Bacteria;Proteobacteria;Gammaproteobacteria;Enterobacterales;Enterobacteriaceae;Shigella;Shigella_sp_SF-2015	0	0	26	0	421	1920	175	0	0	0	4.93225e-05	0	0.000646618	0.00282822	0.000316825	0
Bacteria;Firmicutes;Bacilli;Lactobacillales;Enterococcaceae;Enterococcus;Enterococcus_plantarum	0	0	1711	0	0	0	0	291	0	0	0.0032458	0	0	0	0	0.000556918
Bacteria;Proteobacteria;Gammaproteobacteria;Enterobacterales;Enterobacteriaceae;Citrobacter;Citrobacter_werkmanii	0	0	1307	53	3	0	0	618	0	0	0.0024794	0.00010061	4.60773e-06	0	0	0.00118273
Bacteria;Proteobacteria;Gammaproteobacteria;Enterobacterales;Erwiniaceae;Tatumella;Tatumella_sp_UCD-D_suzukii	0	0	1979	0	0	0	0	0	0	0	0.0037542	0	0	0	0	0
Bacteria;Firmicutes;Bacilli;Bacillales;Staphylococcaceae;Staphylococcus;Staphylococcus_saprophyticus	0	0	12	1947	6	0	0	0	0	0	2.27642e-05	0.00369598	9.21546e-06	0	0	0
Bacteria;Proteobacteria;Gammaproteobacteria;Enterobacterales;Enterobacteriaceae;Buttiauxella;Buttiauxella_brennerae	0	0	1591	31	0	0	0	322	0	0	0.00301816	5.88471e-05	0	0	0	0.000616246
Bacteria;Proteobacteria;Gammaproteobacteria;Enterobacterales;Morganellaceae;Morganella;Morganella_morganii	0	3	930.5	264	0	0	0	737	0	5.69599e-06	0.00176518	0.000501149	0	0	0	0.00141048
Bacteria;Proteobacteria;Gammaproteobacteria;Pseudomonadales;Moraxellaceae;Acinetobacter;Acinetobacter_kyonggiensis	0	890	0	1036	1	0	0	0	0	0.00168981	0	0.00196663	1.53591e-06	0	0	0
Bacteria;Firmicutes;Bacilli;Bacillales;Bacillaceae;Gracilibacillus;Gracilibacillus_orientalis	0	0	0	1908	0	0	0	0	0	0	0	0.00362194	0	0	0	0
Bacteria;Firmicutes;Bacilli;Bacillales;Bacillaceae;Bacillus;Bacillus_safensis	0	0	0	1900	0	0	0	0	0	0	0	0.00360676	0	0	0	0
Bacteria;Proteobacteria;Gammaproteobacteria;Pseudomonadales;Moraxellaceae;Acinetobacter;Acinetobacter_sp_WC-323	0	0	5	1891	2	0	0	2	0	0	9.48509e-06	0.00358967	3.07182e-06	0	0	3.82762e-06
Bacteria;Proteobacteria;Gammaproteobacteria;Enterobacterales;Enterobacterales_noname;Phytobacter;Phytobacter_ursingii	0	0	1535	0	0	0	0	317	0	0	0.00291192	0	0	0	0	0.000606677
Bacteria;Firmicutes;Bacilli;Lactobacillales;Streptococcaceae;Lactococcus;Lactococcus_piscium	161	1695	0	0	0	0	0	0	0.000282085	0.00321824	0	0	0	0	0	0
Bacteria;Proteobacteria;Gammaproteobacteria;Pseudomonadales;Moraxellaceae;Psychrobacter;Psychrobacter_sp_JCM_18901	0	0	4	1800	1	1	14	0	0	0	7.58807e-06	0.00341693	1.53591e-06	1.47303e-06	2.5346e-05	0
Bacteria;Proteobacteria;Gammaproteobacteria;Enterobacterales;Yersiniaceae;Serratia;Serratia_nematodiphila	63	224	26	0	752	0	518	400	0.000110381	0.000425301	4.93225e-05	0	0.001155	0	0.000937803	0.000765523
Bacteria;Proteobacteria;Gammaproteobacteria;Enterobacterales;Erwiniaceae;Pantoea;Pantoea_dispersa	4	72	0	1689	0	0	13	0	7.00833e-06	0.000136704	0	0.00320622	0	0	2.35356e-05	0
Bacteria;Proteobacteria;Gammaproteobacteria;Pseudomonadales;Pseudomonadaceae;Pseudomonas;Pseudomonas_syringae_pv_coryli	67	193	0	1459	13	1	0	51	0.000117389	0.000366442	0	0.00276961	1.99668e-05	1.47303e-06	0	9.76042e-05
Bacteria;Firmicutes;Bacilli;Bacillales;Bacillaceae;Bacillus;Bacillus_cereus	94	288	113	0	374	647	502	0	0.000164696	0.000546815	0.000214363	0	0.00057443	0.00095305	0.000908836	0
Bacteria;Proteobacteria;Gammaproteobacteria;Enterobacterales;Yersiniaceae;Serratia;Serratia_proteamaculans	0	62	1117	162	14	0	6	387	0	0.000117717	0.00211897	0.000307523	2.15027e-05	0	1.08626e-05	0.000740644
Bacteria;Proteobacteria;Gammaproteobacteria;Enterobacterales;Enterobacteriaceae;Enterobacter;Enterobacter_sp_KINAN-G	5	904	0	332	169	0	0	348	8.76041e-06	0.00171639	0	0.000630233	0.000259569	0	0	0.000666005
Bacteria;Proteobacteria;Gammaproteobacteria;Enterobacterales;Enterobacteriaceae;Enterobacter;Enterobacter_sp_FS01	0	445	0	511	953	0	0	0	0	0.000844906	0	0.000970027	0.00146372	0	0	0
Bacteria;Proteobacteria;Gammaproteobacteria;Pseudomonadales;Pseudomonadaceae;Pseudomonas;Pseudomonas_coronafaciens	6	186	22	1440	9	0	0	19	1.05125e-05	0.000353152	4.17344e-05	0.00273354	1.38232e-05	0	0	3.63623e-05
Bacteria;Firmicutes;Clostridia;Clostridiales;Clostridiaceae;Clostridium;Clostridium_botulinum	21	508	235	0	190	974	0	0	3.67937e-05	0.000964522	0.000445799	0	0.000291823	0.00143473	0	0
Bacteria;Firmicutes;Bacilli;Lactobacillales;Carnobacteriaceae;Trichococcus;Trichococcus_flocculiformis	0	93	0	1566	0	0	0	0	0	0.000176576	0	0.00297273	0	0	0	0
Bacteria;Firmicutes;Clostridia;Clostridiales;Clostridiaceae;Clostridium;Clostridium_sp_CAG:354_28_25	9	666	0	0	0	1264	0	0	1.57687e-05	0.00126451	0	0	0	0.00186191	0	0
Bacteria;Proteobacteria;Gammaproteobacteria;Pseudomonadales;Moraxellaceae;Moraxella;Moraxella_atlantae	0	0	0	1616	1	0	4	0	0	0	0	0.00306764	1.53591e-06	0	7.24172e-06	0
Bacteria;Proteobacteria;Gammaproteobacteria;Pseudomonadales;Moraxellaceae;Psychrobacter;Psychrobacter_sp_1501(2011)	0	0	6	1547	7	0	26	5	0	0	1.13821e-05	0.00293666	1.07514e-05	0	4.70712e-05	9.56904e-06
Bacteria;Proteobacteria;Gammaproteobacteria;Enterobacterales;Erwiniaceae;Pantoea;Pantoea_eucrina	0	0	0	1564	2	0	0	0	0	0	0	0.00296893	3.07182e-06	0	0	0
Bacteria;Proteobacteria;Gammaproteobacteria;Pseudomonadales;Moraxellaceae;Moraxella;Moraxella_sp_RCAD0137	0	0	0	1558	0	0	0	1	0	0	0	0.00295754	0	0	0	1.91381e-06
Bacteria;Firmicutes;Bacilli;Bacillales;Staphylococcaceae;Staphylococcus;Staphylococcus_simulans	9	402	21	0	45	1243	38	51	1.57687e-05	0.000763263	3.98374e-05	0	6.91159e-05	0.00183098	6.87963e-05	9.76042e-05
Bacteria;Cyanobacteria;Cyanobacteria_noname;Chroococcales;Chroococcaceae;Chondrocystis;Chondrocystis_sp_NIES-4102	0	0	0	1490	10	0	17	0	0	0	0	0.00282846	1.53591e-05	0	3.07773e-05	0
Bacteria;Proteobacteria;Gammaproteobacteria;Enterobacterales;Enterobacteriaceae;Gibbsiella;Gibbsiella_quercinecans	0	0	1211	0	0	0	0	299	0	0	0.00229729	0	0	0	0	0.000572229
Bacteria;Proteobacteria;Gammaproteobacteria;Pseudomonadales;Moraxellaceae;Psychrobacter;Psychrobacter_sp_PRwf-1	0	0	1	1476	1	0	0	0	0	0	1.89702e-06	0.00280188	1.53591e-06	0	0	0
Bacteria;Proteobacteria;Gammaproteobacteria;Enterobacterales;Enterobacteriaceae;Buttiauxella;Buttiauxella_sp_BIGb0552	0	0	1213	10	0	0	0	244	0	0	0.00230108	1.89829e-05	0	0	0	0.000466969
Bacteria;Proteobacteria;Gammaproteobacteria;Enterobacterales;Enterobacteriaceae;Cedecea;Cedecea_davisae	7	83	172	6	228	525	200	411	1.22646e-05	0.000157589	0.000326287	1.13898e-05	0.000350187	0.000773341	0.000362086	0.000786575
Bacteria;Proteobacteria;Gammaproteobacteria;Cardiobacteriales;Cardiobacteriaceae;Cardiobacterium;Cardiobacterium_valvarum	0	0	11	1122	13	1	0	305	0	0	2.08672e-05	0.00212988	1.99668e-05	1.47303e-06	0	0.000583711
Bacteria;Proteobacteria;Gammaproteobacteria;Enterobacterales;Erwiniaceae;Erwinia;Erwinia_billingiae	0	0	0	1432	24	0	0	0	0	0	0	0.00271835	3.68618e-05	0	0	0
Bacteria;Proteobacteria;Betaproteobacteria;Burkholderiales;Comamonadaceae;Variovorax;Variovorax_sp_WDL1	2	47	39	1326	4	0	0	27	3.50416e-06	8.92372e-05	7.39837e-05	0.00251714	6.14364e-06	0	0	5.16728e-05
Bacteria;Proteobacteria;Gammaproteobacteria;Vibrionales;Vibrionaceae;Photobacterium;Photobacterium_aquimaris	0	0	1182	0	0	0	0	238	0	0	0.00224228	0	0	0	0	0.000455486
Bacteria;Proteobacteria;Gammaproteobacteria;Pseudomonadales;Moraxellaceae;Acinetobacter;Acinetobacter_sp_ANC_4654	1	1015	0	391	0	0	0	8	1.75208e-06	0.00192714	0	0.000742232	0	0	0	1.53105e-05
Bacteria;Proteobacteria;Deltaproteobacteria;Myxococcales;Archangiaceae;Stigmatella;Stigmatella_aurantiaca	594	294	5	78	581	0	0	19	0.00104074	0.000558207	9.48509e-06	0.000148067	0.000892363	0	0	3.63623e-05
Bacteria;Proteobacteria;Gammaproteobacteria;Pseudomonadales;Pseudomonadaceae;Pseudomonas;Pseudomonas_viridiflava	143	217	111	383	147	168	156	139	0.000250548	0.00041201	0.000210569	0.000727046	0.000225779	0.000247469	0.000282427	0.000266019
Bacteria;Proteobacteria;Gammaproteobacteria;Enterobacterales;Enterobacteriaceae;Enterobacteriaceae_noname;Type-F_symbiont_of_Plautia_stali	0	0	0	1363	2	0	0	0	0	0	0	0.00258737	3.07182e-06	0	0	0
Bacteria;Firmicutes;Clostridia;Clostridiales;Clostridiaceae;Natronincola;Natronincola_ferrireducens	0	0	0	1355	0	0	0	0	0	0	0	0.00257219	0	0	0	0
Bacteria;Proteobacteria;Gammaproteobacteria;Pseudomonadales;Moraxellaceae;Psychrobacter;Psychrobacter_lutiphocae	0	0	0	1273	0	0	83	0	0	0	0	0.00241653	0	0	0.000150266	0
Bacteria;Proteobacteria;Gammaproteobacteria;Pseudomonadales;Moraxellaceae;Moraxella;Moraxella_bovoculi	0	0	0	1327	10	0	0	0	0	0	0	0.00251903	1.53591e-05	0	0	0
Bacteria;Firmicutes;Bacilli;Bacillales;Planococcaceae;Kurthia;Kurthia_senegalensis	665	0	0	0	0	922	0	0	0.00116513	0	0	0	0	0.00135813	0	0
Bacteria;Proteobacteria;Gammaproteobacteria;Pseudomonadales;Moraxellaceae;Acinetobacter;Acinetobacter_bouvetii	0	814	0	485	2	0	0	0	0	0.00154551	0	0.000920672	3.07182e-06	0	0	0
Bacteria;Proteobacteria;Gammaproteobacteria;Pseudomonadales;Pseudomonadaceae;Pseudomonas;Pseudomonas_sp_JV551A3	0	17	22	1235	16	0	0	8	0	3.22773e-05	4.17344e-05	0.00234439	2.45746e-05	0	0	1.53105e-05
Bacteria;Proteobacteria;Gammaproteobacteria;Enterobacterales;Enterobacteriaceae;Escherichia;Escherichia_sp_20412-1	0	406	134	0	933	0	0	0	0	0.000770858	0.000254201	0	0.001433	0	0	0
Bacteria;Proteobacteria;Gammaproteobacteria;Enterobacterales;Enterobacteriaceae;Citrobacter;Citrobacter_gillenii	0	0	878	21	2	0	0	388	0	0	0.00166558	3.98641e-05	3.07182e-06	0	0	0.000742557
Bacteria;Bacteroidetes;Flavobacteriia;Flavobacteriales;Flavobacteriaceae;Arenibacter;Arenibacter_certesii	0	0	215	962	132	0	0	0	0	0	0.000407859	0.00182616	0.00020274	0	0	0
Bacteria;Proteobacteria;Deltaproteobacteria;Desulfobacterales;Desulfobulbaceae;Candidatus_Electrothrix;Candidatus_Electrothrix_aarhusiensis	0	0	3	1260	2	0	0	0	0	0	5.69106e-06	0.00239185	3.07182e-06	0	0	0
Bacteria;Proteobacteria;Gammaproteobacteria;Pseudomonadales;Moraxellaceae;Psychrobacter;Psychrobacter_alimentarius	0	0	0	1241	8	0	7	0	0	0	0	0.00235578	1.22873e-05	0	1.2673e-05	0
Bacteria;Proteobacteria;Gammaproteobacteria;Pseudomonadales;Moraxellaceae;Acinetobacter;Acinetobacter_radioresistens	0	544	0	688	7	0	17	0	0	0.00103287	0	0.00130603	1.07514e-05	0	3.07773e-05	0
Bacteria;Proteobacteria;Gammaproteobacteria;Enterobacterales;Enterobacteriaceae;Lelliottia;Lelliottia_sp_WB101	0	291	663	189	0	0	0	99	0	0.000552511	0.00125772	0.000358777	0	0	0	0.000189467
Bacteria;Proteobacteria;Gammaproteobacteria;Enterobacterales;Enterobacteriaceae;Citrobacter;Citrobacter_sp_L55	0	623.5	551	0	0	0	0	64	0	0.00118382	0.00104526	0	0	0	0	0.000122484
Bacteria;Proteobacteria;Gammaproteobacteria;Enterobacterales;Yersiniaceae;Serratia;Serratia_sp_SCBI	0	18	0	1194	0	0	12	11	0	3.4176e-05	0	0.00226656	0	0	2.17252e-05	2.10519e-05
Bacteria;Proteobacteria;Gammaproteobacteria;Enterobacterales;Erwiniaceae;Pantoea;Pantoea_wallisii	0	0	0	1183	17	0	0	0	0	0	0	0.00224568	2.61105e-05	0	0	0
Archaea;Archaea_noname;Archaea_noname;Archaea_noname;Archaea_noname;Archaea_noname;uncultured_archaeon	0	45	0	512	0	793	2	17	0	8.54399e-05	0	0.000971926	0	0.00116811	3.62086e-06	3.25347e-05
Bacteria;Proteobacteria;Gammaproteobacteria;Gammaproteobacteria_noname;Gammaproteobacteria_noname;Gammaproteobacteria_noname;Gammaproteobacteria_bacterium	0	0	7	1162	6	0	2	10	0	0	1.32791e-05	0.00220582	9.21546e-06	0	3.62086e-06	1.91381e-05
Bacteria;Proteobacteria;Gammaproteobacteria;Enterobacterales;Yersiniaceae;Serratia;Serratia_oryzae	0	8	890	0	4	0	0	278	0	1.51893e-05	0.00168835	0	6.14364e-06	0	0	0.000532039
Bacteria;Proteobacteria;Gammaproteobacteria;Pseudomonadales;Moraxellaceae;Acinetobacter;Acinetobacter_nosocomialis	0	213	18	921	7	0	16	0	0	0.000404416	3.41463e-05	0.00174833	1.07514e-05	0	2.89669e-05	0
Bacteria;Proteobacteria;Gammaproteobacteria;Enterobacterales;Yersiniaceae;Nissabacter;Nissabacter_sp_SGAir0207	0	0	0	1162	0	0	0	9	0	0	0	0.00220582	0	0	0	1.72243e-05
Bacteria;Firmicutes;Bacilli;Bacillales;Staphylococcaceae;Staphylococcus;Staphylococcus_pseudintermedius	0	0	0	0	1248	183	0	0	0	0	0	0	0.00191682	0.000269564	0	0
Bacteria;Proteobacteria;Alphaproteobacteria;Rhizobiales;Phyllobacteriaceae;Mesorhizobium;Mesorhizobium_amorphae	0	11	0	1123	0	0	4	0	0	2.08853e-05	0	0.00213178	0	0	7.24172e-06	0
Bacteria;Firmicutes;Bacilli;Lactobacillales;Enterococcaceae;Enterococcus;Enterococcus_saccharolyticus	0	0	0	1123	0	0	0	0	0	0	0	0.00213178	0	0	0	0
Bacteria;Firmicutes;Bacilli;Lactobacillales;Aerococcaceae;Aerococcus;Aerococcus_sp_1KP-2016	95	1032	0	0	0	0	0	0	0.000166448	0.00195942	0	0	0	0	0	0
Bacteria;Proteobacteria;Betaproteobacteria;Burkholderiales;Oxalobacteraceae;Collimonas;Collimonas_fungivorans	0	54	413	532	0	0	0	117	0	0.000102528	0.000783469	0.00100989	0	0	0	0.000223916
Bacteria;Proteobacteria;Gammaproteobacteria;Pseudomonadales;Moraxellaceae;Acinetobacter;Acinetobacter_sp_CIP_102129	0	60	0	1030	1	0	0	0	0	0.00011392	0	0.00195524	1.53591e-06	0	0	0
Bacteria;Bacteroidetes;Flavobacteriia;Flavobacteriales;Flavobacteriaceae;Aequorivita;Aequorivita_capsosiphonis	0	0	0	1090	0	0	0	0	0	0	0	0.00206914	0	0	0	0
Bacteria;Firmicutes;Bacilli;Lactobacillales;Carnobacteriaceae;Carnobacterium;Carnobacterium_sp_WN1374	0	2	5	1055	0	0	2	0	0	3.79733e-06	9.48509e-06	0.0020027	0	0	3.62086e-06	0
Bacteria;Proteobacteria;Gammaproteobacteria;Enterobacterales;Enterobacteriaceae;Enterobacter;Enterobacter_sp_638	0	521	0	537	0	0	0	0	0	0.000989204	0	0.00101938	0	0	0	0
Bacteria;Firmicutes;Bacilli;Bacillales;Staphylococcaceae;Staphylococcus;Staphylococcus_equorum	0	0	0	1046	0	0	0	0	0	0	0	0.00198561	0	0	0	0
Bacteria;Firmicutes;Bacilli;Lactobacillales;Enterococcaceae;Enterococcus;Enterococcus_dispar	0	0	0	1044	0	0	0	0	0	0	0	0.00198182	0	0	0	0
Bacteria;Proteobacteria;Gammaproteobacteria;Enterobacterales;Yersiniaceae;Yersinia;Yersinia_aleksiciae	0	0	251	20	0	0	0	764	0	0	0.000476152	3.79659e-05	0	0	0	0.00146215
Bacteria;Proteobacteria;Gammaproteobacteria;Enterobacterales;Enterobacteriaceae;Citrobacter;Citrobacter_freundii_complex_sp_CFNIH7	0	0	0	0	0	0	0	1030	0	0	0	0	0	0	0	0.00197122
Bacteria;Proteobacteria;Gammaproteobacteria;Pseudomonadales;Moraxellaceae;Acinetobacter;Acinetobacter_populi	0	0	0	1026	0	0	7	3	0	0	0	0.00194765	0	0	1.2673e-05	5.74142e-06
Bacteria;Proteobacteria;Gammaproteobacteria;Pseudomonadales;Moraxellaceae;Moraxella;Moraxella_oblonga	0	0	16	989	26	0	0	0	0	0	3.03523e-05	0.00187741	3.99336e-05	0	0	0
Bacteria;Proteobacteria;Gammaproteobacteria;Enterobacterales;Yersiniaceae;Ewingella;Ewingella_americana	0	76	0	35	0	0	958	0	0	0.000144299	0	6.64402e-05	0	0	0.00173439	0
Bacteria;Proteobacteria;Gammaproteobacteria;Alteromonadales;Shewanellaceae;Shewanella;Shewanella_algae	0	12	783	0	0	0	0	217	0	2.2784e-05	0.00148537	0	0	0	0	0.000415296
Bacteria;Firmicutes;Bacilli;Bacillales;Staphylococcaceae;Staphylococcus;Staphylococcus_aureus	0	0	0	1005	3	0	0	0	0	0	0	0.00190778	4.60773e-06	0	0	0
Bacteria;Proteobacteria;Gammaproteobacteria;Pseudomonadales;Moraxellaceae;Acinetobacter;Acinetobacter_wuhouensis	0	338	0	658	0	1	11	0	0	0.000641749	0	0.00124908	0	1.47303e-06	1.99147e-05	0
Bacteria;Proteobacteria;Gammaproteobacteria;Pseudomonadales;Pseudomonadaceae;Pseudomonas;Pseudomonas_psychrophila	0	22	543	320	0	0	0	113.5	0	4.17706e-05	0.00103008	0.000607454	0	0	0	0.000217217
Bacteria;Proteobacteria;Gammaproteobacteria;Enterobacterales;Erwiniaceae;Erwinia;Erwinia_sp_OLTSP20	0	0	0	0	1227	0	0	0	0	0	0	0	0.00188456	0	0	0
Bacteria;Proteobacteria;Gammaproteobacteria;Enterobacterales;Enterobacteriaceae;Citrobacter;Citrobacter_sp_86	0	515	0	0	582	0	0	0	0	0.000977812	0	0	0.000893899	0	0	0
Bacteria;Proteobacteria;Gammaproteobacteria;Pseudomonadales;Moraxellaceae;Psychrobacter;Psychrobacter_piechaudii	0	0	1	966	4	1	10	0	0	0	1.89702e-06	0.00183375	6.14364e-06	1.47303e-06	1.81043e-05	0
Bacteria;Actinobacteria;Actinobacteria;Micrococcales;Micrococcaceae;Kocuria;Kocuria_indica	0	0	22	767	8	0	180	0	0	0	4.17344e-05	0.00145599	1.22873e-05	0	0.000325877	0
Bacteria;Proteobacteria;Gammaproteobacteria;Pseudomonadales;Moraxellaceae;Acinetobacter;Acinetobacter_ursingii	0	233	0	697.5	0	0	38	0	0	0.000442389	0	0.00132406	0	0	6.87963e-05	0
Bacteria;Proteobacteria;Gammaproteobacteria;Enterobacterales;Erwiniaceae;Erwiniaceae_noname;bacteria_symbiont_BFo1_of_Frankliniella_occidentalis	0	0	0	956	6	0	0	0	0	0	0	0.00181477	9.21546e-06	0	0	0
Bacteria;Proteobacteria;Gammaproteobacteria;Enterobacterales;Enterobacteriaceae;Buttiauxella;Buttiauxella_noackiae	0	0	767	8	0	0	0	176	0	0	0.00145501	1.51863e-05	0	0	0	0.00033683
Bacteria;Proteobacteria;Gammaproteobacteria;Pseudomonadales;Pseudomonadaceae;Pseudomonas;Pseudomonas_weihenstephanensis	0	3	45	887.5	0	0	0	16	0	5.69599e-06	8.53658e-05	0.00168473	0	0	0	3.06209e-05
Bacteria;Proteobacteria;Gammaproteobacteria;Vibrionales;Vibrionaceae;Aliivibrio;Aliivibrio_fischeri	0	0	3	936	3	0	4	0	0	0	5.69106e-06	0.0017768	4.60773e-06	0	7.24172e-06	0
Bacteria;Proteobacteria;Gammaproteobacteria;Enterobacterales;Yersiniaceae;Yersiniaceae_noname;Yersiniaceae_bacterium_2015Iso6	0	0	0	938	0	0	0	0	0	0	0	0.0017806	0	0	0	0
Bacteria;Proteobacteria;Betaproteobacteria;Burkholderiales;Oxalobacteraceae;Massilia;Massilia_sp_Root335	0	10	0	878	0	0	30	0	0	1.89866e-05	0	0.0016667	0	0	5.43129e-05	0
Bacteria;Proteobacteria;Gammaproteobacteria;Pseudomonadales;Moraxellaceae;Moraxella;Moraxella_catarrhalis	0	0	0	909	1	0	3	0	0	0	0	0.00172555	1.53591e-06	0	5.43129e-06	0
Bacteria;Proteobacteria;Gammaproteobacteria;Xanthomonadales;Xanthomonadaceae;Xanthomonas;Xanthomonas_oryzae	7	278	361	69	0	0	0	192	1.22646e-05	0.000527829	0.000684824	0.000130982	0	0	0	0.000367451
Bacteria;Proteobacteria;Gammaproteobacteria;Enterobacterales;Enterobacteriaceae;Klebsiella;Klebsiella_sp_MS_92-3	0	0	0	906	0	0	0	0	0	0	0	0.00171985	0	0	0	0
Bacteria;Proteobacteria;Alphaproteobacteria;Rhizobiales;Xanthobacteraceae;Xanthobacteraceae_noname;Xanthobacteraceae_bacterium	0	0	0	905	0	0	0	0	0	0	0	0.00171795	0	0	0	0
Bacteria;Firmicutes;Bacilli;Lactobacillales;Streptococcaceae;Streptococcus;Streptococcus_gallolyticus	511	0	0	0	23	477	23	0	0.000895314	0	0	0	3.53259e-05	0.000702635	4.16399e-05	0
Bacteria;Firmicutes;Bacilli;Lactobacillales;Enterococcaceae;Enterococcus;Enterococcus_gallinarum	0	282	0	599	0	0	0	0	0	0.000535423	0	0.00113708	0	0	0	0
Bacteria;Proteobacteria;Gammaproteobacteria;Enterobacterales;Yersiniaceae;Serratia;Serratia_sp_FS14	0	0	0	859	6	0	17	0	0	0	0	0.00163063	9.21546e-06	0	3.07773e-05	0
Bacteria;Proteobacteria;Gammaproteobacteria;Aeromonadales;Aeromonadaceae;Aeromonas;Aeromonas_veronii	0	18	817	19	0	0	0	12	0	3.4176e-05	0.00154986	3.60676e-05	0	0	0	2.29657e-05
Bacteria;Firmicutes;Clostridia;Clostridiales;Lachnospiraceae;Blautia;[Ruminococcus]_gnavus	0	0	0	0	1067	0	0	0	0	0	0	0	0.00163882	0	0	0
Bacteria;Proteobacteria;Gammaproteobacteria;Pseudomonadales;Moraxellaceae;Acinetobacter;Acinetobacter_sp_SFB	0	763	0	78	3	0	8	0	0	0.00144868	0	0.000148067	4.60773e-06	0	1.44834e-05	0
Bacteria;Proteobacteria;Gammaproteobacteria;Enterobacterales;Erwiniaceae;Pantoea;Pantoea_sp_aB	0	0	0	838	1	0	7	0	0	0	0	0.00159077	1.53591e-06	0	1.2673e-05	0
Bacteria;Proteobacteria;Gammaproteobacteria;Pseudomonadales;Moraxellaceae;Acinetobacter;Acinetobacter_haemolyticus	0	78	0	753	0	0	9	0	0	0.000148096	0	0.00142941	0	0	1.62939e-05	0
Bacteria;Proteobacteria;Gammaproteobacteria;Pseudomonadales;Pseudomonadaceae;Pseudomonas;Pseudomonas_wadenswilerensis	0	0	801	0	0	0	0	31	0	0	0.00151951	0	0	0	0	5.9328e-05
Bacteria;Firmicutes;Bacilli;Lactobacillales;Carnobacteriaceae;Alkalibacterium;Alkalibacterium_olivapovliticus	74	755	0	0	0	0	0	0	0.000129654	0.00143349	0	0	0	0	0	0
Bacteria;Proteobacteria;Gammaproteobacteria;Enterobacterales;Erwiniaceae;Pantoea;Pantoea_sp_RIT388	0	0	0	804	0	0	0	17	0	0	0	0.00152623	0	0	0	3.25347e-05
Bacteria;Proteobacteria;Gammaproteobacteria;Enterobacterales;Erwiniaceae;Mixta;Mixta_calida	0	13	0	808	0	0	0	0	0	2.46826e-05	0	0.00153382	0	0	0	0
Bacteria;Proteobacteria;Gammaproteobacteria;Pseudomonadales;Moraxellaceae;Acinetobacter;Acinetobacter_junii	0	333	0	482	2	0	3	0	0	0.000632255	0	0.000914977	3.07182e-06	0	5.43129e-06	0
Bacteria;Proteobacteria;Gammaproteobacteria;Pseudomonadales;Moraxellaceae;Acinetobacter;Acinetobacter_sp_WCHAc060092	0	58	0	723	0	0	26	0	0	0.000110123	0	0.00137247	0	0	4.70712e-05	0
Bacteria;Proteobacteria;Gammaproteobacteria;Pseudomonadales;Pseudomonadaceae;Pseudomonas;Pseudomonas_sp_TAA207	0	0	170	602	0	0	0	33	0	0	0.000322493	0.00114277	0	0	0	6.31557e-05
Bacteria;Proteobacteria;Gammaproteobacteria;Pseudomonadales;Pseudomonadaceae;Pseudomonas;Pseudomonas_xinjiangensis	0	0	0	803	0	0	2	0	0	0	0	0.00152433	0	0	3.62086e-06	0
Bacteria;Proteobacteria;Gammaproteobacteria;Enterobacterales;Enterobacteriaceae;Enterobacter;Enterobacter_sp_BIDMC110	416	242	0	10	81	6	75	24	0.000728866	0.000459477	0	1.89829e-05	0.000124409	8.83818e-06	0.000135782	4.59314e-05
Bacteria;Firmicutes;Bacilli;Bacillales;Paenibacillaceae;Paenibacillus;Paenibacillus_sp_HW567	0	0	645	0	0	0	0	150	0	0	0.00122358	0	0	0	0	0.000287071
Bacteria;Proteobacteria;Alphaproteobacteria;Rhodospirillales;Rhodospirillaceae;Thalassospira;Thalassospira_marina	0	0	651	0	0	0	0	136	0	0	0.00123496	0	0	0	0	0.000260278
Bacteria;Proteobacteria;Betaproteobacteria;Burkholderiales;Alcaligenaceae;Achromobacter;Achromobacter_sp_Root83	0	785.5	0	0	0	0	0	0	0	0.0014914	0	0	0	0	0	0
Bacteria;Firmicutes;Bacilli;Lactobacillales;Carnobacteriaceae;Carnobacterium;Carnobacterium_divergens	0	0	0	784	0	0	1	0	0	0	0	0.00148826	0	0	1.81043e-06	0
Bacteria;Firmicutes;Bacilli;Lactobacillales;Streptococcaceae;Streptococcus;Streptococcus_equinus	0	0	0	0	957	0	0	0	0	0	0	0	0.00146987	0	0	0
Bacteria;Proteobacteria;Betaproteobacteria;Burkholderiales;Comamonadaceae;Acidovorax;Acidovorax_soli	0	0	0	773	0	0	0	0	0	0	0	0.00146738	0	0	0	0
Bacteria;Proteobacteria;Betaproteobacteria;Burkholderiales;Alcaligenaceae;Achromobacter;Achromobacter_sp_2789STDY5608607	0	0	0	772	0	0	0	0	0	0	0	0.00146548	0	0	0	0
Bacteria;Bacteroidetes;Flavobacteriia;Flavobacteriales;Flavobacteriaceae;Capnocytophaga;Capnocytophaga_gingivalis	0	0	0	767	0	0	0	0	0	0	0	0.00145599	0	0	0	0
Bacteria;Proteobacteria;Gammaproteobacteria;Vibrionales;Vibrionaceae;Photobacterium;Photobacterium_proteolyticum	0	0	596	0	0	0	0	167	0	0	0.00113062	0	0	0	0	0.000319606
Bacteria;Proteobacteria;Gammaproteobacteria;Pseudomonadales;Pseudomonadaceae;Pseudomonas;Pseudomonas_helleri	0	0	23	735	0	0	0	2	0	0	4.36314e-05	0.00139525	0	0	0	3.82762e-06
Bacteria;Proteobacteria;Gammaproteobacteria;Oceanospirillales;Halomonadaceae;Halomonas;Halomonas_alimentaria	0	0	0	745	0.5	0	3	0.5	0	0	0	0.00141423	7.67955e-07	0	5.43129e-06	9.56904e-07
Bacteria;Proteobacteria;Betaproteobacteria;Burkholderiales;Comamonadaceae;Delftia;Delftia_sp_670	0	0	613	0	0	0	0	129	0	0	0.00116287	0	0	0	0	0.000246881
Bacteria;Proteobacteria;Gammaproteobacteria;Pseudomonadales;Moraxellaceae;Acinetobacter;Acinetobacter_sp_YT-02	0	0	0	730	0	0	6	0	0	0	0	0.00138575	0	0	1.08626e-05	0
Bacteria;Proteobacteria;Gammaproteobacteria;Pseudomonadales;Moraxellaceae;Acinetobacter;Acinetobacter_sp_ANC_3832	0	47.5	0	668	0	0	0	18	0	9.01866e-05	0	0.00126806	0	0	0	3.44485e-05
Bacteria;Proteobacteria;Gammaproteobacteria;Enterobacterales;Enterobacteriaceae;Kosakonia;Kosakonia_sacchari	4	0	573	13	1	1	74	55	7.00833e-06	0	0.00108699	2.46778e-05	1.53591e-06	1.47303e-06	0.000133972	0.000105259
Bacteria;Proteobacteria;Gammaproteobacteria;Enterobacterales;Enterobacteriaceae;Enterobacteriaceae_noname;Enterobacteriaceae_bacterium_bta3-1	0	0	445	27	0	0	0	242	0	0	0.000844173	5.12539e-05	0	0	0	0.000463141
Bacteria;Proteobacteria;Gammaproteobacteria;Pseudomonadales;Moraxellaceae;Moraxella;Moraxella_ovis	0	0	0	707	0	0	0	0	0	0	0	0.00134209	0	0	0	0
Bacteria;Firmicutes;Bacilli;Lactobacillales;Carnobacteriaceae;Carnobacterium;Carnobacterium_sp_AT7	0	0	0	696	0	0	0	0	0	0	0	0.00132121	0	0	0	0
Bacteria;Proteobacteria;Gammaproteobacteria;Oceanospirillales;Oceanospirillaceae;Marinomonas;Marinomonas_atlantica	0	0	0	680	0	0	2	5	0	0	0	0.00129084	0	0	3.62086e-06	9.56904e-06
Bacteria;Proteobacteria;Gammaproteobacteria;Alteromonadales;Moritellaceae;Moritella;Moritella_dasanensis	0	0	0	686	0	0	0	0	0	0	0	0.00130223	0	0	0	0
Bacteria;Proteobacteria;Gammaproteobacteria;Alteromonadales;Alteromonadaceae;Alteromonas;Alteromonas_australica	0	0	4	677	0	0	0	3	0	0	7.58807e-06	0.00128514	0	0	0	5.74142e-06
Bacteria;Proteobacteria;Gammaproteobacteria;Enterobacterales;Enterobacteriaceae;Citrobacter;Citrobacter_youngae	0	242	106	9	0	0	37	284	0	0.000459477	0.000201084	1.70846e-05	0	0	6.69859e-05	0.000543521
Bacteria;Firmicutes;Bacilli;Bacillales;Planococcaceae;Sporosarcina;Sporosarcina_koreensis	0	0	83	566	36	0	0	0	0	0	0.000157453	0.00107443	5.52927e-05	0	0	0
Bacteria;Proteobacteria;Gammaproteobacteria;Enterobacterales;Enterobacteriaceae;Enterobacter;Enterobacter_bugandensis	0	0	0	673	0	0	0	0	0	0	0	0.00127755	0	0	0	0
Bacteria;Proteobacteria;Gammaproteobacteria;Enterobacterales;Yersiniaceae;Rahnella;Rahnella_sp_AA	0	665	0	0	0	0	0	0	0	0.00126261	0	0	0	0	0	0
Bacteria;Proteobacteria;Gammaproteobacteria;Pseudomonadales;Pseudomonadaceae;Pseudomonas;Pseudomonas_sp_BBP2017	0	0	644	0	0	0	0	13	0	0	0.00122168	0	0	0	0	2.48795e-05
Bacteria;Proteobacteria;Gammaproteobacteria;Pseudomonadales;Pseudomonadaceae;Pseudomonas;Pseudomonas_marginalis	0	106	34	445	46	0	0	21	0	0.000201258	6.44986e-05	0.00084474	7.06518e-05	0	0	4.019e-05
Bacteria;Firmicutes;Bacilli;Lactobacillales;Aerococcaceae;Aerococcus;Aerococcus_sp_SJQ22	51	594	0	0	0	0	0	0	8.93561e-05	0.00112781	0	0	0	0	0	0
Bacteria;Firmicutes;Bacilli;Lactobacillales;Enterococcaceae;Enterococcus;Enterococcus_avium	0	0	0	639	0	0	0	0	0	0	0	0.00121301	0	0	0	0
Bacteria;Proteobacteria;Betaproteobacteria;Burkholderiales;Alcaligenaceae;Achromobacter;Achromobacter_xylosoxidans	0	532	2	49	8	0	0	46	0	0.00101009	3.79404e-06	9.30163e-05	1.22873e-05	0	0	8.80352e-05
Bacteria;Firmicutes;Bacilli;Lactobacillales;Enterococcaceae;Enterococcus;Enterococcus_hirae	0	0	0	629	0	0	0	0	0	0	0	0.00119403	0	0	0	0
Bacteria;Proteobacteria;Gammaproteobacteria;Pseudomonadales;Moraxellaceae;Acinetobacter;Acinetobacter_sp_ANC_3903	0	35	0	593	0	0	0	0	0	6.64533e-05	0	0.00112569	0	0	0	0
Bacteria;Proteobacteria;Gammaproteobacteria;Enterobacterales;Enterobacteriaceae;Buttiauxella;Buttiauxella_izardii	0	0	243	348	0	0	0	32	0	0	0.000460976	0.000660606	0	0	0	6.12418e-05
Bacteria;Firmicutes;Bacilli;Bacillales;Bacillaceae;Bacillus;Bacillus_licheniformis	18	0	0	292	126	0	166	51	3.15375e-05	0	0	0.000554301	0.000193525	0	0.000300531	9.76042e-05
Bacteria;Proteobacteria;Gammaproteobacteria;Pseudomonadales;Moraxellaceae;Acinetobacter;Acinetobacter_towneri	0	17	0	599	0	0	0	2	0	3.22773e-05	0	0.00113708	0	0	0	3.82762e-06
Bacteria;Actinobacteria;Actinobacteria;Micrococcales;Micrococcaceae;Rothia;Rothia_mucilaginosa	0	0	6	77	48	259	67	215	0	0	1.13821e-05	0.000146169	7.37237e-05	0.000381515	0.000121299	0.000411469
Bacteria;Proteobacteria;Gammaproteobacteria;Alteromonadales;Alteromonadaceae;Marinobacter;Marinobacter_halotolerans	0	0	3	595	0	0	0	0	0	0	5.69106e-06	0.00112948	0	0	0	0
Bacteria;Proteobacteria;Gammaproteobacteria;Pseudomonadales;Moraxellaceae;Acinetobacter;Acinetobacter_bereziniae	0	16	0	513	3	0	44	14	0	3.03786e-05	0	0.000973824	4.60773e-06	0	7.96589e-05	2.67933e-05
Bacteria;Proteobacteria;Gammaproteobacteria;Enterobacterales;Enterobacteriaceae;Escherichia;Escherichia_sp_MOD1-EC6098	0	0	0	0	724	0	0	0	0	0	0	0	0.001112	0	0	0
Bacteria;Firmicutes;Bacilli;Bacillales;Bacillaceae;Bacillus;Bacillus_velezensis	12	536	0	0	11	9	0	13	2.1025e-05	0.00101768	0	0	1.6895e-05	1.32573e-05	0	2.48795e-05
Bacteria;Proteobacteria;Gammaproteobacteria;Enterobacterales;Enterobacteriaceae;Buttiauxella;Buttiauxella_ferragutiae	0	0	487	0	0	0	0	87	0	0	0.000923848	0	0	0	0	0.000166501
Bacteria;Proteobacteria;Gammaproteobacteria;Enterobacterales;Yersiniaceae;Serratia;Serratia_sp_DD3	0	0	514	15	0	0	0	33	0	0	0.000975068	2.84744e-05	0	0	0	6.31557e-05
Bacteria;Proteobacteria;Betaproteobacteria;Neisseriales;Neisseriaceae;Neisseria;Neisseria_meningitidis	61	45	60	262	42	47	0	64	0.000106877	8.54399e-05	0.000113821	0.000497353	6.45082e-05	6.92324e-05	0	0.000122484
Bacteria;Firmicutes;Clostridia;Clostridiales;Clostridiaceae;Candidatus_Arthromitus;Candidatus_Arthromitus_sp_SFB-turkey	2	0	3	452	27	23	5	54	3.50416e-06	0	5.69106e-06	0.000858028	4.14696e-05	3.38797e-05	9.05215e-06	0.000103346
Bacteria;Proteobacteria;Gammaproteobacteria;Pseudomonadales;Moraxellaceae;Acinetobacter;Acinetobacter_sp_ACNIH1	3	508	0	39	2.5	0	0	0	5.25624e-06	0.000964522	0	7.40334e-05	3.83977e-06	0	0	0
Bacteria;Proteobacteria;Gammaproteobacteria;Vibrionales;Vibrionaceae;Photobacterium;Photobacterium_carnosum	0	0	1	538	2	0	1	0	0	0	1.89702e-06	0.00102128	3.07182e-06	0	1.81043e-06	0
Bacteria;Proteobacteria;Gammaproteobacteria;Pseudomonadales;Moraxellaceae;Acinetobacter;Acinetobacter_sp_WCHAc010034	1	113	0	418	0	0	0	0	1.75208e-06	0.000214549	0	0.000793486	0	0	0	0
Bacteria;Firmicutes;Bacilli;Lactobacillales;Enterococcaceae;Pilibacter;Pilibacter_termitis	0	0	0	0	115	373	155	0	0	0	0	0	0.00017663	0.00054944	0.000280617	0
Bacteria;Proteobacteria;Gammaproteobacteria;Pseudomonadales;Pseudomonadaceae;Pseudomonas;Pseudomonas_chlororaphis	0	0	469	35	0	0	0	25	0	0	0.000889702	6.64402e-05	0	0	0	4.78452e-05
Bacteria;Proteobacteria;Gammaproteobacteria;Vibrionales;Vibrionaceae;Vibrio;Vibrio_vulnificus	0	0	20	505	0	0	0	0	0	0	3.79404e-05	0.000958638	0	0	0	0
Bacteria;Bacteroidetes;Flavobacteriia;Flavobacteriales;Flavobacteriaceae;Maribacter;Maribacter_aquivivus	0	0	0	522	1	0	0	0	0	0	0	0.000990909	1.53591e-06	0	0	0
Bacteria;Proteobacteria;Gammaproteobacteria;Enterobacterales;Enterobacteriaceae;Yokenella;Yokenella_regensburgei	8	178	19	8	20	48	27	224	1.40167e-05	0.000337962	3.60434e-05	1.51863e-05	3.07182e-05	7.07054e-05	4.88816e-05	0.000428693
Bacteria;Proteobacteria;Gammaproteobacteria;Pseudomonadales;Moraxellaceae;Acinetobacter;Acinetobacter_rudis	0	178	4	323	0	0	12	0	0	0.000337962	7.58807e-06	0.000613148	0	0	2.17252e-05	0
Bacteria;Firmicutes;Bacilli;Bacillales;Bacillaceae;Bacillus;Bacillus_sp_MUM_116	0	0	0	516	0	0	0	0	0	0	0	0.000979519	0	0	0	0
Bacteria;Proteobacteria;Gammaproteobacteria;Pseudomonadales;Moraxellaceae;Acinetobacter;Acinetobacter_sp_RIT592	0	456	0	50	10	0	0	0	0	0.000865791	0	9.49146e-05	1.53591e-05	0	0	0
Bacteria;Proteobacteria;Betaproteobacteria;Burkholderiales;Alcaligenaceae;Bordetella;Bordetella_sp_SCN_68-11	0	0	429	0	0	0	0	84	0	0	0.000813821	0	0	0	0	0.00016076
Bacteria;Cyanobacteria;Cyanobacteria_noname;Chroococcidiopsidales;Chroococcidiopsidaceae;Chroococcidiopsis;Chroococcidiopsis_cubana	0	0	0	0	0	0	0	508	0	0	0	0	0	0	0	0.000972214
Bacteria;Proteobacteria;Gammaproteobacteria;Pseudomonadales;Pseudomonadaceae;Pseudomonas;Pseudomonas_putida	0	10	62	415	0	0	3	21	0	1.89866e-05	0.000117615	0.000787791	0	0	5.43129e-06	4.019e-05
Bacteria;Proteobacteria;Gammaproteobacteria;Pseudomonadales;Pseudomonadaceae;Pseudomonas;Pseudomonas_citronellolis	29	113	28	195	6	0	1	134	5.08104e-05	0.000214549	5.31165e-05	0.000370167	9.21546e-06	0	1.81043e-06	0.00025645
Bacteria;Proteobacteria;Gammaproteobacteria;Enterobacterales;Erwiniaceae;Pantoea;Pantoea_sp_CFSAN033090	0	0	0	497	0	0	3	0	0	0	0	0.000943451	0	0	5.43129e-06	0
Bacteria;Proteobacteria;Betaproteobacteria;Neisseriales;Neisseriaceae;Neisseria;Neisseria_flavescens	0	0	12	474	0	0	0	5	0	0	2.27642e-05	0.000899791	0	0	0	9.56904e-06
Bacteria;Proteobacteria;Gammaproteobacteria;Pseudomonadales;Moraxellaceae;Psychrobacter;Psychrobacter_sp_DAB_AL62B	0	0	0	489	0	0	0	0	0	0	0	0.000928265	0	0	0	0
Bacteria;Proteobacteria;Gammaproteobacteria;Alteromonadales;Pseudoalteromonadaceae;Pseudoalteromonas;Pseudoalteromonas_sp_S554	0	0	0	484	0	0	0	0	0	0	0	0.000918774	0	0	0	0
Bacteria;Proteobacteria;Betaproteobacteria;Nitrosomonadales;Nitrosomonadaceae;Nitrosomonas;Nitrosomonas_ureae	0	0	17	458	11	0	0	0	0	0	3.22493e-05	0.000869418	1.6895e-05	0	0	0
Bacteria;Proteobacteria;Gammaproteobacteria;Oceanospirillales;Halomonadaceae;Halomonas;Halomonas_halocynthiae	0	0	410	0	0	0	0	68	0	0	0.000777778	0	0	0	0	0.000130139
Bacteria;Firmicutes;Bacilli;Bacillales;Paenibacillaceae;Paenibacillus;Paenibacillus_sp_P22	8	22	259	21	0	0	7	157	1.40167e-05	4.17706e-05	0.000491328	3.98641e-05	0	0	1.2673e-05	0.000300468
Bacteria;Proteobacteria;Gammaproteobacteria;Enterobacterales;Enterobacteriaceae;Pseudescherichia;Pseudescherichia_vulneris	0	37	9	395	18.5	0	16	0	0	7.02506e-05	1.70732e-05	0.000749826	2.84143e-05	0	2.89669e-05	0
Bacteria;Firmicutes;Bacilli;Lactobacillales;Carnobacteriaceae;Trichococcus;Trichococcus_ilyis	0	0	0	471	0	0	0	0	0	0	0	0.000894096	0	0	0	0
Bacteria;Proteobacteria;Gammaproteobacteria;Enterobacterales;Erwiniaceae;Erwinia;Erwinia_sp_198	0	0	0	58	7	0	0	403	0	0	0	0.000110101	1.07514e-05	0	0	0.000771265
Bacteria;Proteobacteria;Gammaproteobacteria;Enterobacterales;Erwiniaceae;Pantoea;Pantoea_conspicua	0	0	0	462	9	0	0	0	0	0	0	0.000877011	1.38232e-05	0	0	0
Bacteria;Proteobacteria;Gammaproteobacteria;Enterobacterales;Erwiniaceae;Erwinia;Erwinia_mallotivora	9	285	0	144	20	0	0	15	1.57687e-05	0.000541119	0	0.000273354	3.07182e-05	0	0	2.87071e-05
Bacteria;Proteobacteria;Gammaproteobacteria;Pseudomonadales;Moraxellaceae;Acinetobacter;Acinetobacter_sp_ANC_4973	0	149	0	318	0	0	0	0	0	0.000282901	0	0.000603657	0	0	0	0
Bacteria;Proteobacteria;Epsilonproteobacteria;Campylobacterales;Campylobacteraceae;Campylobacter;Campylobacter_jejuni	0	22	0	88	80	0	12	276	0	4.17706e-05	0	0.00016705	0.000122873	0	2.17252e-05	0.000528211
Bacteria;Proteobacteria;Gammaproteobacteria;Enterobacterales;Erwiniaceae;Pantoea;Pantoea_cypripedii	0	0	387	0	0	0	0	74	0	0	0.000734146	0	0	0	0	0.000141622
Bacteria;Proteobacteria;Alphaproteobacteria;Rhizobiales;Brucellaceae;Brucella;Brucella_melitensis	0	0	9	448	0	0	0	4	0	0	1.70732e-05	0.000850435	0	0	0	7.65523e-06
Bacteria;Proteobacteria;Gammaproteobacteria;Enterobacterales;Enterobacteriaceae;Enterobacter;Enterobacter_sp_CGMCC_5087	0	0	455	0	0	0	0	0	0	0	0.000863144	0	0	0	0	0
Bacteria;Proteobacteria;Gammaproteobacteria;Cellvibrionales;Cellvibrionaceae;Teredinibacter;Teredinibacter_turnerae	0	0	0	454	0	0	0	0	0	0	0	0.000861825	0	0	0	0
Bacteria;Firmicutes;Bacilli;Lactobacillales;Aerococcaceae;Globicatella;Globicatella_sp_HMSC072A10	34	422	0	0	0	0	0	0	5.95708e-05	0.000801236	0	0	0	0	0	0
Bacteria;Proteobacteria;Gammaproteobacteria;Cardiobacteriales;Cardiobacteriales_noname;Cardiobacteriales_noname;Cardiobacteriales_bacterium	0	0	0	450.5	0	0	3	0	0	0	0	0.000855181	0	0	5.43129e-06	0
Bacteria;Proteobacteria;Gammaproteobacteria;Enterobacterales;Enterobacteriaceae;Enterobacteriaceae_noname;Enterobacteriaceae_bacterium_w17	0	417	0	0	43	0	0	0	0	0.000791743	0	0	6.60441e-05	0	0	0
Bacteria;Proteobacteria;Gammaproteobacteria;Enterobacterales;Erwiniaceae;Pantoea;Pantoea_brenneri	6	99	0	337	11	0	0	0	1.05125e-05	0.000187968	0	0.000639725	1.6895e-05	0	0	0
Bacteria;Proteobacteria;Gammaproteobacteria;Enterobacterales;Yersiniaceae;Serratia;Serratia_rubidaea	0	25	0	378	11	0	0	36	0	4.74666e-05	0	0.000717555	1.6895e-05	0	0	6.88971e-05
Bacteria;Firmicutes;Bacilli;Lactobacillales;Lactobacillaceae;Lactobacillus;Lactobacillus_ruminis	10	356	0	0	77	18	0	4	1.75208e-05	0.000675925	0	0	0.000118265	2.65145e-05	0	7.65523e-06
Bacteria;Proteobacteria;Gammaproteobacteria;Enterobacterales;Erwiniaceae;Pantoea;Pantoea_sp_ICBG_1758	0	0	0	443	0	0	0	0	0	0	0	0.000840944	0	0	0	0
Bacteria;Proteobacteria;Gammaproteobacteria;Enterobacterales;Erwiniaceae;Erwinia;Candidatus_Erwinia_dacicola	0	0	0	269	120	0	3	68	0	0	0	0.000510641	0.000184309	0	5.43129e-06	0.000130139
Bacteria;Proteobacteria;Betaproteobacteria;Burkholderiales;Comamonadaceae;Comamonas;Comamonas_testosteroni	0	0	5	429	0	1	0	2	0	0	9.48509e-06	0.000814368	0	1.47303e-06	0	3.82762e-06
Bacteria;Proteobacteria;Gammaproteobacteria;Pseudomonadales;Moraxellaceae;Psychrobacter;Psychrobacter_sp_DAB_AL60	0	0	0	436	0	0	0	0	0	0	0	0.000827656	0	0	0	0
Bacteria;Proteobacteria;Alphaproteobacteria;Rhizobiales;Brucellaceae;Ochrobactrum;Ochrobactrum_sp_EGD-AQ16	0	0	0	434	0	0	1	0	0	0	0	0.000823859	0	0	1.81043e-06	0
Bacteria;Proteobacteria;Gammaproteobacteria;Enterobacterales;Erwiniaceae;Mixta;Mixta_theicola	0	0	0	0	531	0	0	0	0	0	0	0	0.000815568	0	0	0
Bacteria;Proteobacteria;Gammaproteobacteria;Pseudomonadales;Moraxellaceae;Acinetobacter;Acinetobacter_sp_GC2	1	205	0	218	1	0	0	3	1.75208e-06	0.000389226	0	0.000413828	1.53591e-06	0	0	5.74142e-06
Bacteria;Proteobacteria;Gammaproteobacteria;Gammaproteobacteria_noname;Gammaproteobacteria_noname;Gammaproteobacteria_noname;Bathymodiolus_platifrons_methanotrophic_gill_symbiont	0	0	0	417	2.5	0	9	0	0	0	0	0.000791588	3.83977e-06	0	1.62939e-05	0
Bacteria;Firmicutes;Bacilli;Lactobacillales;Enterococcaceae;Enterococcus;Enterococcus_italicus	50	378	0	0	0	0	0	0	8.76041e-05	0.000717695	0	0	0	0	0	0
Bacteria;Proteobacteria;Gammaproteobacteria;Enterobacterales;Enterobacteriaceae;Kosakonia;Kosakonia_radicincitans	0	0	0	332	0	0	0	89	0	0	0	0.000630233	0	0	0	0.000170329
Bacteria;Proteobacteria;Gammaproteobacteria;Cellvibrionales;Cellvibrionaceae;Agaribacterium;Agaribacterium_haliotis	0	0	0	405	0	0	13	0	0	0	0	0.000768808	0	0	2.35356e-05	0
Bacteria;Proteobacteria;Betaproteobacteria;Burkholderiales;Comamonadaceae;Variovorax;Variovorax_sp_502	0	0	0	417	0	0	0	0	0	0	0	0.000791588	0	0	0	0
Bacteria;Proteobacteria;Gammaproteobacteria;Enterobacterales;Enterobacteriaceae;Citrobacter;Citrobacter_murliniae	0	4	335	5	0	4	3	66	0	7.59466e-06	0.000635501	9.49146e-06	0	5.89212e-06	5.43129e-06	0.000126311
Bacteria;Proteobacteria;Gammaproteobacteria;Enterobacterales;Enterobacteriaceae;Citrobacter;Citrobacter_pasteurii	0	26	291	5	0	0	6	88	0	4.93653e-05	0.000552032	9.49146e-06	0	0	1.08626e-05	0.000168415
Bacteria;Proteobacteria;Gammaproteobacteria;Pseudomonadales;Moraxellaceae;Acinetobacter;Acinetobacter_idrijaensis	0	410	0	0	3	0	0	0	0	0.000778452	0	0	4.60773e-06	0	0	0
Bacteria;Proteobacteria;Gammaproteobacteria;Pseudomonadales;Moraxellaceae;Acinetobacter;Acinetobacter_sp_CIP_5111	2	353	0	37	20	0	0	0	3.50416e-06	0.000670229	0	7.02368e-05	3.07182e-05	0	0	0
Bacteria;Proteobacteria;Gammaproteobacteria;Pseudomonadales;Pseudomonadaceae;Pseudomonas;Pseudomonas_sp_FSL_W5-0299	0	81	270	42	17	0	0	0	0	0.000153792	0.000512195	7.97283e-05	2.61105e-05	0	0	0
Bacteria;Proteobacteria;Epsilonproteobacteria;Epsilonproteobacteria_noname;Epsilonproteobacteria_noname;Epsilonproteobacteria_noname;Epsilonproteobacteria_bacterium	0	0	0	406	0	0	0	0	0	0	0	0.000770707	0	0	0	0
Bacteria;Proteobacteria;Gammaproteobacteria;Pseudomonadales;Moraxellaceae;Acinetobacter;Acinetobacter_schindleri	3	235	0	168	0	0	0	0	5.25624e-06	0.000446186	0	0.000318913	0	0	0	0
Bacteria;Firmicutes;Bacilli;Lactobacillales;Lactobacillaceae;Lactobacillus;Lactobacillus_sp_MT-2016-YK43	0	271	31	0	31	58	13	0	0	0.000514538	5.88076e-05	0	4.76132e-05	8.54357e-05	2.35356e-05	0
Bacteria;Proteobacteria;Gammaproteobacteria;Enterobacterales;Enterobacteriaceae;Enterobacter;Enterobacter_timonensis	0	30	0	0	435	0	0	0	0	5.69599e-05	0	0	0.000668121	0	0	0
Bacteria;Proteobacteria;Gammaproteobacteria;Pseudomonadales;Moraxellaceae;Acinetobacter;Acinetobacter_sp_187	0	24	0	347	9	0	0	0	0	4.55679e-05	0	0.000658708	1.38232e-05	0	0	0
Bacteria;Proteobacteria;Gammaproteobacteria;Pseudomonadales;Moraxellaceae;Acinetobacter;Acinetobacter_pragensis	0	22	0	356	0	0	0	0	0	4.17706e-05	0	0.000675792	0	0	0	0
Bacteria;Proteobacteria;Gammaproteobacteria;Oceanospirillales;Halomonadaceae;Halomonas;Halomonas_sp_ALS9	0	0	330	0	0	0	0	45	0	0	0.000626016	0	0	0	0	8.61213e-05
Bacteria;Firmicutes;Bacilli;Lactobacillales;Lactobacillaceae;Lactobacillus;Lactobacillus_curvatus	8	309	0	0	52	0	0	11	1.40167e-05	0.000586687	0	0	7.98673e-05	0	0	2.10519e-05
Bacteria;Proteobacteria;Gammaproteobacteria;Enterobacterales;Erwiniaceae;Pantoea;Pantoea_septica	0	0	0	226	0	0	0	141.5	0	0	0	0.000429014	0	0	0	0.000270804
Bacteria;Proteobacteria;Gammaproteobacteria;Pseudomonadales;Moraxellaceae;Acinetobacter;Acinetobacter_sp	0	207	0	150	5	0	5.5	1	0	0.000393024	0	0.000284744	7.67955e-06	0	9.95736e-06	1.91381e-06
Bacteria;Firmicutes;Clostridia;Clostridiales;Lachnospiraceae;Oribacterium;Oribacterium_parvum	0	0	0	364	0	0	0	0	0	0	0	0.000690978	0	0	0	0
Bacteria;Proteobacteria;Gammaproteobacteria;Aeromonadales;Aeromonadaceae;Aeromonas;Aeromonas_hydrophila	0	225	81.5	26	10	0	0	20	0	0.0004272	0.000154607	4.93556e-05	1.53591e-05	0	0	3.82762e-05
Bacteria;Proteobacteria;Gammaproteobacteria;Enterobacterales;Enterobacteriaceae;Enterobacteriaceae_noname;Plautia_stali_symbiont	0	0	0	354	2	0	0	0	0	0	0	0.000671996	3.07182e-06	0	0	0
Bacteria;Proteobacteria;Gammaproteobacteria;Vibrionales;Vibrionaceae;Vibrio;Vibrio_metoecus	0	0	0	348	0	0	7	0	0	0	0	0.000660606	0	0	1.2673e-05	0
Bacteria;Proteobacteria;Gammaproteobacteria;Enterobacterales;Morganellaceae;Xenorhabdus;Xenorhabdus_doucetiae	0	0	0	57	0	0	0	294	0	0	0	0.000108203	0	0	0	0.000562659
Bacteria;Proteobacteria;Gammaproteobacteria;Pseudomonadales;Moraxellaceae;Acinetobacter;Acinetobacter_sp_SA01	0	12	0	341	0	0	0	0	0	2.2784e-05	0	0.000647318	0	0	0	0
Bacteria;Firmicutes;Bacilli;Bacillales;Staphylococcaceae;Macrococcus;Macrococcus_caseolyticus	0	150	0	0	0	247	0	6	0	0.0002848	0	0	0	0.000363838	0	1.14828e-05
Bacteria;Proteobacteria;Gammaproteobacteria;Enterobacterales;Enterobacteriaceae;Candidatus_Hamiltonella;Candidatus_Hamiltonella_defensa	0	0	276	0	0	0	0	70	0	0	0.000523577	0	0	0	0	0.000133967
Bacteria;Proteobacteria;Gammaproteobacteria;Alteromonadales;Alteromonadaceae;Marinobacter;Marinobacter_fuscus	0	0	0	345	1	0	0	0	0	0	0	0.000654911	1.53591e-06	0	0	0
Bacteria;Proteobacteria;Gammaproteobacteria;Aeromonadales;Aeromonadaceae;Oceanisphaera;Oceanisphaera_avium	0	0	36	284	31	0	0	0	0	0	6.82927e-05	0.000539115	4.76132e-05	0	0	0
Bacteria;Firmicutes;Tissierellia;Tissierellia_noname;Tissierellia_noname;Sedimentibacter;Sedimentibacter_sp_SX930	4	26	0	314	0	0	0	0	7.00833e-06	4.93653e-05	0	0.000596064	0	0	0	0
Bacteria;Proteobacteria;Gammaproteobacteria;Enterobacterales;Enterobacterales_noname;Plesiomonas;Plesiomonas_shigelloides	0	32	0	0	380	4	0	0	0	6.07573e-05	0	0	0.000583646	5.89212e-06	0	0
Bacteria;Firmicutes;Bacilli;Lactobacillales;Aerococcaceae;Aerococcus;Aerococcus_suis	32	309	0	0	0	0	0	0	5.60666e-05	0.000586687	0	0	0	0	0	0
Bacteria;Proteobacteria;Gammaproteobacteria;Pseudomonadales;Moraxellaceae;Acinetobacter;Acinetobacter_sp_COS3	0	338	0	0	0	0	0	0	0	0.000641749	0	0	0	0	0	0
Bacteria;Proteobacteria;Gammaproteobacteria;Gammaproteobacteria_noname;Gammaproteobacteria_noname;Gammaproteobacteria_noname;gamma_proteobacterium_10BT	0	3	0	56	0	0	0	276	0	5.69599e-06	0	0.000106304	0	0	0	0.000528211
Bacteria;Proteobacteria;Gammaproteobacteria;Enterobacterales;Enterobacteriaceae;Enterobacter;Enterobacter_sp_A11	0	0	103	0	196	0	0	75	0	0	0.000195393	0	0.000301038	0	0	0.000143536
Bacteria;Proteobacteria;Gammaproteobacteria;Enterobacterales;Enterobacteriaceae;Enterobacter;Enterobacter_sp_CC120223-11	0	2	0	0	0	0	252	88	0	3.79733e-06	0	0	0	0	0.000456228	0.000168415
Bacteria;Proteobacteria;Gammaproteobacteria;Vibrionales;Vibrionaceae;Vibrio;Vibrio_sp_10N22252B12	0	0	0	323	0	0	0	0	0	0	0	0.000613148	0	0	0	0
Bacteria;Proteobacteria;Gammaproteobacteria;Legionellales;Legionellaceae;Legionella;Legionella_pneumophila	0	0	0	316	0	0	0	0	0	0	0	0.00059986	0	0	0	0
Bacteria;Proteobacteria;Gammaproteobacteria;Pseudomonadales;Pseudomonadaceae;Pseudomonas;Pseudomonas_endophytica	0	0	6	300	0	0	10	0	0	0	1.13821e-05	0.000569488	0	0	1.81043e-05	0
Bacteria;Firmicutes;Bacilli;Lactobacillales;Carnobacteriaceae;Trichococcus;Trichococcus_sp_ART1	0	309	0	0	0	0	0	0	0	0.000586687	0	0	0	0	0	0
Bacteria;Proteobacteria;Gammaproteobacteria;Oceanospirillales;Halomonadaceae;Halomonas;Halomonas_smyrnensis	0	0	19	290	0	0	0	0	0	0	3.60434e-05	0.000550505	0	0	0	0
Bacteria;Proteobacteria;Betaproteobacteria;Burkholderiales;Sutterellaceae;Parasutterella;Parasutterella_excrementihominis	0	0	22	20	0	2	240	36	0	0	4.17344e-05	3.79659e-05	0	2.94606e-06	0.000434503	6.88971e-05
Bacteria;Proteobacteria;Gammaproteobacteria;Pseudomonadales;Pseudomonadaceae;Pseudomonas;Pseudomonas_sp_OV144	0	0	0	295	0	0	11.5	2	0	0	0	0.000559996	0	0	2.08199e-05	3.82762e-06
Bacteria;Proteobacteria;Gammaproteobacteria;Pseudomonadales;Moraxellaceae;Acinetobacter;Acinetobacter_sp_C15	0	0	39	243	31	0	0	0	0	0	7.39837e-05	0.000461285	4.76132e-05	0	0	0
Bacteria;Proteobacteria;Gammaproteobacteria;Enterobacterales;Enterobacteriaceae;Enterobacter;Enterobacter_sp_E20	0	0	193	95	0	0	0	19	0	0	0.000366125	0.000180338	0	0	0	3.63623e-05
Bacteria;Actinobacteria;Actinobacteria;Bifidobacteriales;Bifidobacteriaceae;Bifidobacterium;Bifidobacterium_bohemicum	4	283	0	0	11	14	0	0	7.00833e-06	0.000537322	0	0	1.6895e-05	2.06224e-05	0	0
Bacteria;Proteobacteria;Gammaproteobacteria;Enterobacterales;Enterobacteriaceae;Klebsiella;Klebsiella_sp_HMSC09D12	9	262	0	0	0	0	0	35	1.57687e-05	0.00049745	0	0	0	0	0	6.69833e-05
Bacteria;Proteobacteria;Gammaproteobacteria;Alteromonadales;Pseudoalteromonadaceae;Pseudoalteromonas;Pseudoalteromonas_sp_A601	0	0	0	305	0	0	0	0	0	0	0	0.000578979	0	0	0	0
Bacteria;Proteobacteria;Gammaproteobacteria;Pseudomonadales;Moraxellaceae;Acinetobacter;Acinetobacter_sp_CIP_101966	0	270	0	33	1	0	0	0	0	0.000512639	0	6.26437e-05	1.53591e-06	0	0	0
Bacteria;Proteobacteria;Gammaproteobacteria;Pseudomonadales;Moraxellaceae;Moraxella;Moraxella_macacae	0	0	0	295	0	0	8	0	0	0	0	0.000559996	0	0	1.44834e-05	0
Bacteria;Proteobacteria;Betaproteobacteria;Burkholderiales;Comamonadaceae;Comamonas;Comamonas_sp_B-9	0	0	0	298	0	0	0	0	0	0	0	0.000565691	0	0	0	0
Bacteria;Firmicutes;Bacilli;Lactobacillales;Leuconostocaceae;Weissella;Weissella_viridescens	0	0	0	0	352	16	0	0	0	0	0	0	0.00054064	2.35685e-05	0	0
Bacteria;Proteobacteria;Gammaproteobacteria;Pseudomonadales;Pseudomonadaceae;Pseudomonas;Pseudomonas_salomonii	0	28	27	236	0	0	2	3	0	5.31626e-05	5.12195e-05	0.000447997	0	0	3.62086e-06	5.74142e-06
Bacteria;Firmicutes;Clostridia;Clostridiales;Lachnospiraceae;Lachnospiraceae_noname;Lachnospiraceae_bacterium_oral_taxon_500	0	0	0	295	0	0	0	0	0	0	0	0.000559996	0	0	0	0
Bacteria;Actinobacteria;Actinobacteria;Corynebacteriales;Nocardiaceae;Rhodococcus;Rhodococcus_imtechensis	0	0	0	5	0	1	300	0	0	0	0	9.49146e-06	0	1.47303e-06	0.000543129	0
Bacteria;Proteobacteria;Gammaproteobacteria;Pseudomonadales;Moraxellaceae;Acinetobacter;Acinetobacter_sp_CFCC_11171	0	193	0	98	0	0	0	0	0	0.000366442	0	0.000186033	0	0	0	0
Bacteria;Proteobacteria;Gammaproteobacteria;Pseudomonadales;Moraxellaceae;Acinetobacter;Acinetobacter_soli	0	9	0	282	0	0	0	0	0	1.7088e-05	0	0.000535318	0	0	0	0
Bacteria;Proteobacteria;Gammaproteobacteria;Pseudomonadales;Moraxellaceae;Moraxella;Moraxella_equi	0	0	4	282	0	0	1	3	0	0	7.58807e-06	0.000535318	0	0	1.81043e-06	5.74142e-06
Bacteria;Proteobacteria;Gammaproteobacteria;Pasteurellales;Pasteurellaceae;Chelonobacter;Chelonobacter_oris	0	0	0	6	15	304	36	0	0	0	0	1.13898e-05	2.30386e-05	0.000447801	6.51755e-05	0
Bacteria;Firmicutes;Bacilli;Bacillales;Bacillaceae;Lentibacillus;Lentibacillus_jeotgali	0	0	0	288	0	0	0	0	0	0	0	0.000546708	0	0	0	0
Bacteria;Proteobacteria;Gammaproteobacteria;Pseudomonadales;Pseudomonadaceae;Pseudomonas;Pseudomonas_lactis	0	0	281	0	0	0	0	6	0	0	0.000533062	0	0	0	0	1.14828e-05
Bacteria;Proteobacteria;Gammaproteobacteria;Pseudomonadales;Pseudomonadaceae;Pseudomonas;Pseudomonas_cichorii	0	2	17	252	0	0	0	14	0	3.79733e-06	3.22493e-05	0.00047837	0	0	0	2.67933e-05
Bacteria;Proteobacteria;Gammaproteobacteria;Aeromonadales;Aeromonadaceae;Aeromonas;Aeromonas_media	0	243	15	27	0	0	0	0	0	0.000461375	2.84553e-05	5.12539e-05	0	0	0	0
Bacteria;Proteobacteria;Gammaproteobacteria;Enterobacterales;Enterobacteriaceae;Enterobacteriaceae_noname;Enterobacteriaceae_bacterium_w6	0	189	0	0	118	0	0	0	0	0.000358848	0	0	0.000181237	0	0	0
Bacteria;Proteobacteria;Gammaproteobacteria;Pseudomonadales;Pseudomonadaceae;Pseudomonas;Pseudomonas_sp_BAY1663	0	0	210	37	0	0	0	36	0	0	0.000398374	7.02368e-05	0	0	0	6.88971e-05
Bacteria;Proteobacteria;Alphaproteobacteria;Rhizobiales;Phyllobacteriaceae;Mesorhizobium;Mesorhizobium_sp_LNHC220B00	0	0	0	277	5	0	0	0	0	0	0	0.000525827	7.67955e-06	0	0	0
Bacteria;Proteobacteria;Gammaproteobacteria;Pseudomonadales;Pseudomonadaceae;Pseudomonas;Pseudomonas_alkylphenolica	0	0	273	0	0	0	0	6.5	0	0	0.000517886	0	0	0	0	1.24398e-05
Bacteria;Firmicutes;Clostridia;Clostridiales;Peptostreptococcaceae;Clostridioides;Clostridioides_difficile	0	23	174	24	0	0	0	58	0	4.36693e-05	0.000330081	4.5559e-05	0	0	0	0.000111001
Bacteria;Bacteroidetes;Bacteroidia;Bacteroidales;Rikenellaceae;Alistipes;Alistipes_onderdonkii	0	0	0	0	0	0	292	0	0	0	0	0	0	0	0.000528646	0
Bacteria;Proteobacteria;Gammaproteobacteria;Enterobacterales;Erwiniaceae;Pantoea;Pantoea_sp_IMH	0	0	0	278	0	0	0	0	0	0	0	0.000527725	0	0	0	0
Bacteria;Firmicutes;Bacilli;Lactobacillales;Lactobacillaceae;Lactobacillus;Lactobacillus_salivarius	5	210	0	2	54	5	0	12	8.76041e-06	0.00039872	0	3.79659e-06	8.29391e-05	7.36515e-06	0	2.29657e-05
Bacteria;Proteobacteria;Gammaproteobacteria;Pseudomonadales;Moraxellaceae;Moraxella;Moraxella_nonliquefaciens	0	0	0	276	0	0	0	0	0	0	0	0.000523929	0	0	0	0
Bacteria;Proteobacteria;Gammaproteobacteria;Enterobacterales;Erwiniaceae;Erwinia;Erwinia_sp_Marseille-P5165	0	0	0	273	0	0	0	0	0	0	0	0.000518234	0	0	0	0
Bacteria;Proteobacteria;Gammaproteobacteria;Enterobacterales;Erwiniaceae;Pantoea;Pantoea_sp_MBLJ3	0	0	0	272	0	0	0	0	0	0	0	0.000516336	0	0	0	0
Bacteria;Proteobacteria;Gammaproteobacteria;Enterobacterales;Erwiniaceae;Pantoea;Pantoea_sp_NGS-ED-1003	0	10	0	80	0	0	0	180.5	0	1.89866e-05	0	0.000151863	0	0	0	0.000345442
Bacteria;Proteobacteria;Gammaproteobacteria;Enterobacterales;Enterobacteriaceae;Citrobacter;Citrobacter_sp_BIDMC108	0	0	0	218	24	0	0	34	0	0	0	0.000413828	3.68618e-05	0	0	6.50695e-05
Bacteria;Proteobacteria;Gammaproteobacteria;Enterobacterales;Yersiniaceae;Rahnella;Rahnella_sp_Y9602	0	0	0	269	1	0	0	0	0	0	0	0.000510641	1.53591e-06	0	0	0
Bacteria;Proteobacteria;Betaproteobacteria;Neisseriales;Neisseriaceae;Neisseria;Neisseria_sp_oral_taxon_020	0	0	0	260	0	0	9	0	0	0	0	0.000493556	0	0	1.62939e-05	0
Bacteria;Proteobacteria;Gammaproteobacteria;Enterobacterales;Enterobacteriaceae;Buttiauxella;Buttiauxella_sp_JUb87	0	28	190	0	0	0	0	50	0	5.31626e-05	0.000360434	0	0	0	0	9.56904e-05
Bacteria;Proteobacteria;Gammaproteobacteria;Pseudomonadales;Moraxellaceae;Acinetobacter;Acinetobacter_tjernbergiae	0	0	19	225	30	0	0	0	0	0	3.60434e-05	0.000427116	4.60773e-05	0	0	0
Bacteria;Proteobacteria;Gammaproteobacteria;Pseudomonadales;Moraxellaceae;Acinetobacter;Acinetobacter_sp_SFC	0	36	0	232	0	0	0	0	0	6.83519e-05	0	0.000440404	0	0	0	0
Bacteria;Proteobacteria;Gammaproteobacteria;Enterobacterales;Enterobacteriaceae;Mangrovibacter;Mangrovibacter_phragmitis	0	0	0	268	0	0	0	0	0	0	0	0.000508742	0	0	0	0
Bacteria;Proteobacteria;Gammaproteobacteria;Pseudomonadales;Moraxellaceae;Acinetobacter;Acinetobacter_sp_MF4642	4	149	0	115	0	0	0	0	7.00833e-06	0.000282901	0	0.000218304	0	0	0	0
Bacteria;Proteobacteria;Gammaproteobacteria;Enterobacterales;Enterobacteriaceae;Raoultella;Raoultella_sp_BIGb0399	0	263	0	0	0	2	0	2	0	0.000499349	0	0	0	2.94606e-06	0	3.82762e-06
Bacteria;Proteobacteria;Gammaproteobacteria;Pseudomonadales;Moraxellaceae;Acinetobacter;Acinetobacter_calcoaceticus	2	99	0	164	0	0	0	0	3.50416e-06	0.000187968	0	0.00031132	0	0	0	0
Bacteria;Actinobacteria;Actinobacteria;Streptomycetales;Streptomycetaceae;Streptomyces;Streptomyces_sp_Tu6071	0	249	0	0	19	0	0	0	0	0.000472767	0	0	2.91823e-05	0	0	0
Bacteria;Bacteria_noname;Bacteria_noname;Bacteria_noname;Bacteria_noname;Bacteria_noname;bacterium_ADurbBin431	0	244	0	0	18	0	0	5	0	0.000463274	0	0	2.76464e-05	0	0	9.56904e-06
Bacteria;Proteobacteria;Gammaproteobacteria;Pseudomonadales;Pseudomonadaceae;Pseudomonas;Pseudomonas_syringae_group_genomosp_7	0	21	0	240	0	0	0	2	0	3.9872e-05	0	0.00045559	0	0	0	3.82762e-06
Bacteria;Proteobacteria;Gammaproteobacteria;Alteromonadales;Pseudoalteromonadaceae;Pseudoalteromonas;Pseudoalteromonas_sp_BSi20495	0	0	0	263	0	0	0	0	0	0	0	0.000499251	0	0	0	0
Bacteria;Proteobacteria;Gammaproteobacteria;Oceanospirillales;Hahellaceae;Hahella;Hahella_chejuensis	7	161	0	11	0	0	0	81	1.22646e-05	0.000305685	0	2.08812e-05	0	0	0	0.000155018
Bacteria;Proteobacteria;Gammaproteobacteria;Pseudomonadales;Moraxellaceae;Acinetobacter;Acinetobacter_beijerinckii	2	70	0	183	0	0	0	0	3.50416e-06	0.000132907	0	0.000347388	0	0	0	0
Bacteria;Cyanobacteria;Cyanobacteria_noname;Synechococcales;Coelosphaeriaceae;Snowella;Snowella_sp	0	0	0	247	6	0	0	0	0	0	0	0.000468878	9.21546e-06	0	0	0
Bacteria;Proteobacteria;Gammaproteobacteria;Pseudomonadales;Moraxellaceae;Acinetobacter;Acinetobacter_sp_CIP_562	0	0	0	251	0	0	0	0	0	0	0	0.000476471	0	0	0	0
Bacteria;Proteobacteria;Gammaproteobacteria;Enterobacterales;Erwiniaceae;Pantoea;Pantoea_stewartii	0	20	105	97	9	0	0	19	0	3.79733e-05	0.000199187	0.000184134	1.38232e-05	0	0	3.63623e-05
Bacteria;Firmicutes;Clostridia;Clostridiales;Ruminococcaceae;Ruminococcus;Ruminococcus_flavefaciens	0	248	0	0	0	0	0	0	0	0.000470869	0	0	0	0	0	0
Bacteria;Proteobacteria;Gammaproteobacteria;Cardiobacteriales;Cardiobacteriaceae;Suttonella;Suttonella_indologenes	0	0	21	26	7	3	196	5	0	0	3.98374e-05	4.93556e-05	1.07514e-05	4.41909e-06	0.000354844	9.56904e-06
Bacteria;Proteobacteria;Gammaproteobacteria;Pasteurellales;Pasteurellaceae;Haemophilus;Haemophilus_parainfluenzae	0	0	0	237	2	0	7	0	0	0	0	0.000449895	3.07182e-06	0	1.2673e-05	0
Bacteria;Firmicutes;Bacilli;Lactobacillales;Enterococcaceae;Tetragenococcus;Tetragenococcus_halophilus	0	0	0	239	0	0	0	0	0	0	0	0.000453692	0	0	0	0
Bacteria;Proteobacteria;Gammaproteobacteria;Pseudomonadales;Pseudomonadaceae;Pseudomonas;Pseudomonas_sp_MF6394	0	0	0	238	0	0	0	0	0	0	0	0.000451794	0	0	0	0
Bacteria;Proteobacteria;Betaproteobacteria;Betaproteobacteria_noname;Betaproteobacteria_noname;Candidatus_Accumulibacter;Candidatus_Accumulibacter_sp_SK-01	0	13	149	0	49	0	0	35	0	2.46826e-05	0.000282656	0	7.52596e-05	0	0	6.69833e-05
Bacteria;Proteobacteria;Gammaproteobacteria;Pseudomonadales;Moraxellaceae;Moraxella;Moraxella_porci	0	0	1	234	0	0	0	0	0	0	1.89702e-06	0.0004442	0	0	0	0
Bacteria;Firmicutes;Bacilli;Lactobacillales;Carnobacteriaceae;Jeotgalibaca;Jeotgalibaca_arthritidis	23	137	0	76	0	0	0	0	4.02979e-05	0.000260117	0	0.00014427	0	0	0	0
Bacteria;Nitrospirae;Nitrospira;Nitrospirales;Nitrospiraceae;Candidatus_Magnetoovum;Candidatus_Magnetoovum_chiemensis	0	21	0	184	0	0	0	29	0	3.9872e-05	0	0.000349286	0	0	0	5.55004e-05
Bacteria;Proteobacteria;Gammaproteobacteria;Pasteurellales;Pasteurellaceae;Haemophilus;Haemophilus_haemoglobinophilus	0	0	0	234	0	0	0	0	0	0	0	0.0004442	0	0	0	0
Bacteria;Bacteroidetes;Sphingobacteriia;Sphingobacteriales;Sphingobacteriaceae;Sphingobacterium;Sphingobacterium_gobiense	0	0	0	230	4	0	0	0	0	0	0	0.000436607	6.14364e-06	0	0	0
Bacteria;Proteobacteria;Gammaproteobacteria;Enterobacterales;Enterobacteriaceae;Escherichia;Escherichia_sp_E2562	0	0	0	0	288	0	0	0	0	0	0	0	0.000442342	0	0	0
Bacteria;Proteobacteria;Gammaproteobacteria;Pseudomonadales;Pseudomonadales_noname;Pseudomonadales_noname;Pseudomonadales_bacterium	0	0	30	175	34	0	0	0	0	0	5.69106e-05	0.000332201	5.22209e-05	0	0	0
Bacteria;Proteobacteria;Gammaproteobacteria;Enterobacterales;Enterobacteriaceae;Escherichia;Escherichia_sp_MOD1-EC6842	0	0	0	0	0	0	0	227	0	0	0	0	0	0	0	0.000434434
Bacteria;Proteobacteria;Gammaproteobacteria;Pseudomonadales;Moraxellaceae;Acinetobacter;Acinetobacter_guillouiae	0	28	0	200	0	0	0	0	0	5.31626e-05	0	0.000379659	0	0	0	0
Bacteria;Proteobacteria;Gammaproteobacteria;Aeromonadales;Aeromonadaceae;Aeromonas;Aeromonas_salmonicida	0	120	0	26	0	0	0	81	0	0.00022784	0	4.93556e-05	0	0	0	0.000155018
Bacteria;Proteobacteria;Gammaproteobacteria;Enterobacterales;Enterobacteriaceae;Metakosakonia;Metakosakonia_massiliensis	0	23	0	38	0	0	166	7	0	4.36693e-05	0	7.21351e-05	0	0	0.000300531	1.33967e-05
Bacteria;Proteobacteria;Gammaproteobacteria;Pseudomonadales;Moraxellaceae;Acinetobacter;Acinetobacter_sp_ANC_5324	0	210	0	16	0	0	0	0	0	0.00039872	0	3.03727e-05	0	0	0	0
Bacteria;Proteobacteria;Gammaproteobacteria;Enterobacterales;Enterobacteriaceae;Escherichia;Escherichia_sp_B1147	0	0	0	0	278	0	0	0	0	0	0	0	0.000426983	0	0	0
Bacteria;Proteobacteria;Gammaproteobacteria;Enterobacterales;Yersiniaceae;Yersinia;Yersinia_mollaretii	0	12	183	0	0	0	0	28	0	2.2784e-05	0.000347154	0	0	0	0	5.35866e-05
Bacteria;Proteobacteria;Gammaproteobacteria;Pseudomonadales;Pseudomonadaceae;Pseudomonas;Pseudomonas_sp_K2W31S-8	0	0	219	0	0	0	0	4	0	0	0.000415447	0	0	0	0	7.65523e-06
Bacteria;Proteobacteria;Gammaproteobacteria;Pseudomonadales;Moraxellaceae;Acinetobacter;Acinetobacter_sp_ANC_4648	0	86	0	135.5	0	0	0	0	0	0.000163285	0	0.000257219	0	0	0	0
Bacteria;Proteobacteria;Betaproteobacteria;Burkholderiales;Burkholderiaceae;Ralstonia;Ralstonia_solanacearum	0	10	0	194	0	0	0	16	0	1.89866e-05	0	0.000368269	0	0	0	3.06209e-05
Bacteria;Proteobacteria;Gammaproteobacteria;Pseudomonadales;Moraxellaceae;Acinetobacter;Acinetobacter_sp_AR2-3	1	149	0	17	8.5	0	0	45	1.75208e-06	0.000282901	0	3.2271e-05	1.30552e-05	0	0	8.61213e-05
Bacteria;Actinobacteria;Actinobacteria;Micrococcales;Micrococcaceae;Arthrobacter;Arthrobacter_sp_Hiyo8	0	0	179	0	0	0	0	35	0	0	0.000339566	0	0	0	0	6.69833e-05
Bacteria;Proteobacteria;Gammaproteobacteria;Enterobacterales;Enterobacteriaceae;Enterobacter;Enterobacter_sp_ku-bf2	0	0	163	0	0	0	0	49	0	0	0.000309214	0	0	0	0	9.37766e-05
Bacteria;Proteobacteria;Betaproteobacteria;Burkholderiales;Alcaligenaceae;Bordetella;Bordetella_hinzii	0	51	28	113	0	0	0	20	0	9.68319e-05	5.31165e-05	0.000214507	0	0	0	3.82762e-05
Bacteria;Actinobacteria;Actinobacteria;Micrococcales;Micrococcaceae;Kocuria;Kocuria_marina	0	0	5	159	2	0	45	0	0	0	9.48509e-06	0.000301829	3.07182e-06	0	8.14693e-05	0
Bacteria;Firmicutes;Bacilli;Lactobacillales;Streptococcaceae;Lactococcus;Lactococcus_sp_1JSPR-7	0	0	175	0	0	0	0	33	0	0	0.000331978	0	0	0	0	6.31557e-05
Bacteria;Proteobacteria;Gammaproteobacteria;Pseudomonadales;Moraxellaceae;Acinetobacter;Acinetobacter_sp_BMW17	0	45	0	163	0	0	0	0	0	8.54399e-05	0	0.000309422	0	0	0	0
Bacteria;Cyanobacteria;Cyanobacteria_noname;Synechococcales;Merismopediaceae;Aphanocapsa;Aphanocapsa_montana	0	0	0	206	0	0	0	0	0	0	0	0.000391048	0	0	0	0
Bacteria;Proteobacteria;Gammaproteobacteria;Alteromonadales;Pseudoalteromonadaceae;Pseudoalteromonas;Pseudoalteromonas_sp_BSi20480	0	0	4	202	0	0	0	0	0	0	7.58807e-06	0.000383455	0	0	0	0
Bacteria;Proteobacteria;Gammaproteobacteria;Gammaproteobacteria_noname;Gammaproteobacteria_noname;Ignatzschineria;Ignatzschineria_cameli	0	0	0	181	3	0	23	0	0	0	0	0.000343591	4.60773e-06	0	4.16399e-05	0
Bacteria;Proteobacteria;Gammaproteobacteria;Pseudomonadales;Moraxellaceae;Acinetobacter;Acinetobacter_brisouii	0	24	0	164	0	0	16	0	0	4.55679e-05	0	0.00031132	0	0	2.89669e-05	0
Bacteria;Proteobacteria;Gammaproteobacteria;Enterobacterales;Erwiniaceae;Pantoea;Pantoea_anthophila	0	18	0	184	0	0	0	0	0	3.4176e-05	0	0.000349286	0	0	0	0
Bacteria;Proteobacteria;Gammaproteobacteria;Thiotrichales;Thiotrichaceae;Thiothrix;Thiothrix_lacustris	0	0	0	202	0	0	0	0	0	0	0	0.000383455	0	0	0	0
Bacteria;Proteobacteria;Gammaproteobacteria;Enterobacterales;Morganellaceae;Providencia;Providencia_stuartii	0	0	0	13	213	21	0	0	0	0	0	2.46778e-05	0.000327149	3.09336e-05	0	0
Bacteria;Firmicutes;Bacilli;Lactobacillales;Streptococcaceae;Floricoccus;Floricoccus_tropicus	0	0	177	0	0	0	0	24	0	0	0.000335772	0	0	0	0	4.59314e-05
Bacteria;Proteobacteria;Gammaproteobacteria;Pseudomonadales;Moraxellaceae;Acinetobacter;Acinetobacter_sp_ANC_4999	0	12	0	189	0	0	0	0	0	2.2784e-05	0	0.000358777	0	0	0	0
Bacteria;Proteobacteria;Gammaproteobacteria;Pseudomonadales;Moraxellaceae;Acinetobacter;Acinetobacter_gerneri	0	0	0	200.5	0	0	0	0	0	0	0	0.000380608	0	0	0	0
Bacteria;Proteobacteria;Gammaproteobacteria;Oceanospirillales;Oceanospirillales_noname;Oceanospirillales_noname;Oceanospirillales_bacterium	0	0	0	200	0	0	0	0	0	0	0	0.000379659	0	0	0	0
Bacteria;Proteobacteria;Gammaproteobacteria;Pseudomonadales;Moraxellaceae;Acinetobacter;Acinetobacter_tandoii	0	21	0	160	0	0	6	12	0	3.9872e-05	0	0.000303727	0	0	1.08626e-05	2.29657e-05
Bacteria;Proteobacteria;Gammaproteobacteria;Enterobacterales;Enterobacteriaceae;Pseudocitrobacter;Pseudocitrobacter_faecalis	0	0	0	0	1	0	0	196	0	0	0	0	1.53591e-06	0	0	0.000375106
Bacteria;Proteobacteria;Alphaproteobacteria;Rhizobiales;Rhizobiaceae;Sinorhizobium;Sinorhizobium_sp_GL28	0	180	0	0	0	0	0	18	0	0.00034176	0	0	0	0	0	3.44485e-05
Bacteria;Proteobacteria;Gammaproteobacteria;Enterobacterales;Erwiniaceae;Pantoea;Pantoea_sp_GM01	1	182	0	0	0	0	0	15	1.75208e-06	0.000345557	0	0	0	0	0	2.87071e-05
Bacteria;Proteobacteria;Gammaproteobacteria;Enterobacterales;Enterobacteriaceae;Siccibacter;Siccibacter_colletis	0	0	0	21	0	0	185	0	0	0	0	3.98641e-05	0	0	0.00033493	0
Bacteria;Firmicutes;Bacilli;Lactobacillales;Leuconostocaceae;Oenococcus;Oenococcus_alcoholitolerans	6	177	0	0	9	0	3	4.5	1.05125e-05	0.000336064	0	0	1.38232e-05	0	5.43129e-06	8.61213e-06
Bacteria;Firmicutes;Bacilli;Bacillales;Bacillaceae;Virgibacillus;Virgibacillus_pantothenticus	0	0	0	197	0	0	0	0	0	0	0	0.000373964	0	0	0	0
Bacteria;Proteobacteria;Gammaproteobacteria;Enterobacterales;Enterobacteriaceae;Izhakiella;Izhakiella_australiensis	0	0	165	0	0	0	0	30	0	0	0.000313008	0	0	0	0	5.74142e-05
Bacteria;Proteobacteria;Gammaproteobacteria;Pseudomonadales;Pseudomonadaceae;Pseudomonas;Pseudomonas_sp_Irchel_s3a18	0	0	0	194	0	0	0	0	0	0	0	0.000368269	0	0	0	0
Bacteria;Proteobacteria;Gammaproteobacteria;Pseudomonadales;Pseudomonadaceae;Pseudomonas;Pseudomonas_sp_AD21	0	46	138	8	0	0	0	2	0	8.73386e-05	0.000261789	1.51863e-05	0	0	0	3.82762e-06
Bacteria;Firmicutes;Bacilli;Lactobacillales;Carnobacteriaceae;Carnobacterium;Carnobacterium_maltaromaticum	0	0	0	193	0	0	0	0	0	0	0	0.00036637	0	0	0	0
Bacteria;Proteobacteria;Gammaproteobacteria;Enterobacterales;Yersiniaceae;Nissabacter;Nissabacter_archeti	0	21	0	8	0	0	0	162	0	3.9872e-05	0	1.51863e-05	0	0	0	0.000310037
Bacteria;Proteobacteria;Gammaproteobacteria;Enterobacterales;Erwiniaceae;Pantoea;Pantoea_sp_PSNIH1	0	0	0	186	7	0	0	0	0	0	0	0.000353082	1.07514e-05	0	0	0
Bacteria;Proteobacteria;Gammaproteobacteria;Enterobacterales;Morganellaceae;Xenorhabdus;Xenorhabdus_szentirmaii	0	0	8	157	1	0	27	0	0	0	1.51761e-05	0.000298032	1.53591e-06	0	4.88816e-05	0
Bacteria;Proteobacteria;Gammaproteobacteria;Oceanospirillales;Hahellaceae;Sansalvadorimonas;Sansalvadorimonas_verongulae	0	0	158	0	0	0	0	33	0	0	0.000299729	0	0	0	0	6.31557e-05
Bacteria;Proteobacteria;Gammaproteobacteria;Enterobacterales;Morganellaceae;Xenorhabdus;Xenorhabdus_innexi	0	0	0	191	0	0	0	0	0	0	0	0.000362574	0	0	0	0
Bacteria;Proteobacteria;Epsilonproteobacteria;Campylobacterales;Helicobacteraceae;Helicobacter;Helicobacter_sp_12S02634-8	0	0	11	0	11	220	0	0	0	0	2.08672e-05	0	1.6895e-05	0.000324067	0	0
Bacteria;Proteobacteria;Gammaproteobacteria;Enterobacterales;Enterobacteriaceae;Raoultella;Raoultella_electrica	0	0	0	0	0	0	0	189	0	0	0	0	0	0	0	0.00036171
Bacteria;Proteobacteria;Betaproteobacteria;Betaproteobacteria_noname;Betaproteobacteria_noname;Candidatus_Accumulibacter;Candidatus_Accumulibacter_sp_SK-11	0	155	0	16	0	0	0	18	0	0.000294293	0	3.03727e-05	0	0	0	3.44485e-05
Bacteria;Firmicutes;Bacilli;Lactobacillales;Enterococcaceae;Enterococcus;Enterococcus_quebecensis	0	0	168	0	0	0	0	21	0	0	0.000318699	0	0	0	0	4.019e-05
Bacteria;Proteobacteria;Gammaproteobacteria;Pseudomonadales;Moraxellaceae;Acinetobacter;Acinetobacter_sp_ANC_3862	0	7	0	179	0	0	0	0	0	1.32907e-05	0	0.000339794	0	0	0	0
Bacteria;Proteobacteria;Gammaproteobacteria;Vibrionales;Vibrionaceae;Vibrio;Vibrio_lentus	0	9	0	176	0	0	0	0	0	1.7088e-05	0	0.000334099	0	0	0	0
Bacteria;Proteobacteria;Gammaproteobacteria;Pseudomonadales;Pseudomonadaceae;Pseudomonas;Pseudomonas_sp_Irchel_s3h9	0	0	0	183	0	0	0	0	0	0	0	0.000347388	0	0	0	0
Bacteria;Proteobacteria;Gammaproteobacteria;Thiotrichales;Thiotrichaceae;Thiotrichaceae_noname;Thiotrichaceae_bacterium	0	0	0	183	0	0	0	0	0	0	0	0.000347388	0	0	0	0
Bacteria;Proteobacteria;Gammaproteobacteria;Enterobacterales;Enterobacteriaceae;Mangrovibacter;Mangrovibacter_sp_MFB070	0	0	149	0	0	0	0	33	0	0	0.000282656	0	0	0	0	6.31557e-05
Bacteria;Proteobacteria;Gammaproteobacteria;Pseudomonadales;Moraxellaceae;Acinetobacter;Acinetobacter_sp_CFCC_10889	0	15	0	167	0	0	0	0	0	2.848e-05	0	0.000317015	0	0	0	0
Bacteria;Proteobacteria;Gammaproteobacteria;Enterobacterales;Enterobacteriaceae;Siccibacter;Siccibacter_turicensis	0	0	0	180	0	0	0	0	0	0	0	0.000341693	0	0	0	0
Bacteria;Proteobacteria;Gammaproteobacteria;Pseudomonadales;Moraxellaceae;Acinetobacter;Acinetobacter_sp_BIGb0102	2	8	0	170	0	0	0	0	3.50416e-06	1.51893e-05	0	0.00032271	0	0	0	0
Bacteria;Proteobacteria;Gammaproteobacteria;Pseudomonadales;Moraxellaceae;Moraxella;Moraxella_cuniculi	0	0	0	179	0	0	0	0	0	0	0	0.000339794	0	0	0	0
Bacteria;Proteobacteria;Gammaproteobacteria;Pseudomonadales;Moraxellaceae;Acinetobacter;Acinetobacter_sp_ANC_4470	0	89	0	89	0	0	0	0	0	0.000168981	0	0.000168948	0	0	0	0
Bacteria;Proteobacteria;Gammaproteobacteria;Pseudomonadales;Pseudomonadaceae;Pseudomonas;Pseudomonas_sp_5	0	0	176	0	0	0	0	2	0	0	0.000333875	0	0	0	0	3.82762e-06
Bacteria;Proteobacteria;Gammaproteobacteria;Enterobacterales;Erwiniaceae;Pantoea;Pantoea_endophytica	0	0	0	177	0	0	0	0	0	0	0	0.000335998	0	0	0	0
Bacteria;Proteobacteria;Gammaproteobacteria;Pseudomonadales;Pseudomonadaceae;Pseudomonas;Pseudomonas_agarici	0	0	0	177	0	0	0	0	0	0	0	0.000335998	0	0	0	0
Bacteria;Proteobacteria;Gammaproteobacteria;Aeromonadales;Aeromonadaceae;Aeromonas;Aeromonas_caviae	0	57	0	29	0	0	0	89	0	0.000108224	0	5.50505e-05	0	0	0	0.000170329
Bacteria;Proteobacteria;Gammaproteobacteria;Pseudomonadales;Moraxellaceae;Alkanindiges;Alkanindiges_sp_H1	0	0	0	166	0	0	10	0	0	0	0	0.000315117	0	0	1.81043e-05	0
Bacteria;Proteobacteria;Gammaproteobacteria;Enterobacterales;Enterobacteriaceae;Buttiauxella;Buttiauxella_warmboldiae	0	0	159	0	1	0	0	14	0	0	0.000301626	0	1.53591e-06	0	0	2.67933e-05
Bacteria;Bacteroidetes;Bacteroidia;Bacteroidales;Tannerellaceae;Parabacteroides;Parabacteroides_distasonis	0	0	18	18	0	0	135	7	0	0	3.41463e-05	3.41693e-05	0	0	0.000244408	1.33967e-05
Bacteria;Proteobacteria;Gammaproteobacteria;Pseudomonadales;Pseudomonadaceae;Pseudomonas;Pseudomonas_donghuensis	0	16	104	50	0	0	0	0.5	0	3.03786e-05	0.00019729	9.49146e-05	0	0	0	9.56904e-07
Bacteria;Proteobacteria;Gammaproteobacteria;Pseudomonadales;Pseudomonadaceae;Pseudomonas;Pseudomonas_protegens	0	17	0	153	0	0	0	0	0	3.22773e-05	0	0.000290439	0	0	0	0
Bacteria;Proteobacteria;Gammaproteobacteria;Enterobacterales;Erwiniaceae;Mixta;Mixta_gaviniae	0	0	0	170	0	0	0	0	0	0	0	0.00032271	0	0	0	0
Bacteria;Proteobacteria;Gammaproteobacteria;Pseudomonadales;Moraxellaceae;Acinetobacter;Acinetobacter_sp_ANC_3813	0	51	0	118	0	0	0	0	0	9.68319e-05	0	0.000223999	0	0	0	0
Bacteria;Proteobacteria;Gammaproteobacteria;Pseudomonadales;Moraxellaceae;Moraxella;Moraxella_pluranimalium	0	0	0	168	0	0	0	0	0	0	0	0.000318913	0	0	0	0
Bacteria;Proteobacteria;Betaproteobacteria;Burkholderiales;Alcaligenaceae;Pusillimonas;Pusillimonas_sp_T7-7	0	167	0	0	0	0	0	0	0	0.000317077	0	0	0	0	0	0
Bacteria;Proteobacteria;Alphaproteobacteria;Rhizobiales;Rhizobiaceae;Agrobacterium;Agrobacterium_deltaense	0	116	0	7	0	0	0	41	0	0.000220245	0	1.3288e-05	0	0	0	7.84661e-05
Bacteria;Proteobacteria;Gammaproteobacteria;Enterobacterales;Enterobacteriaceae;Citrobacter;Citrobacter_sp_KTE32	0	0	137	0	0	0	0	26	0	0	0.000259892	0	0	0	0	4.9759e-05
Bacteria;Proteobacteria;Gammaproteobacteria;Enterobacterales;Erwiniaceae;Tatumella;Tatumella_ptyseos	0	0	98	0	57	0	0	18	0	0	0.000185908	0	8.75468e-05	0	0	3.44485e-05
Bacteria;Proteobacteria;Gammaproteobacteria;Enterobacterales;Enterobacteriaceae;Citrobacter;Citrobacter_sp_TSA-1	0	148	13	0	0	0	0	1	0	0.000281002	2.46612e-05	0	0	0	0	1.91381e-06
Bacteria;Firmicutes;Bacilli;Bacillales;Bacillaceae;Halolactibacillus;Halolactibacillus_miurensis	0	0	0	161	0	0	0	0	0	0	0	0.000305625	0	0	0	0
Bacteria;Proteobacteria;Gammaproteobacteria;Pseudomonadales;Pseudomonadaceae;Pseudomonas;Pseudomonas_sp_SWI44	0	0	161	0	0	0	0	0	0	0	0.00030542	0	0	0	0	0
Bacteria;Proteobacteria;Gammaproteobacteria;Enterobacterales;Enterobacteriaceae;Citrobacter;Citrobacter_sp_MGH103	0	0	92	25	0	0	0	42	0	0	0.000174526	4.74573e-05	0	0	0	8.03799e-05
Bacteria;Proteobacteria;Betaproteobacteria;Neisseriales;Neisseriaceae;Eikenella;Eikenella_corrodens	0	0	140	0	0	0	0	19	0	0	0.000265583	0	0	0	0	3.63623e-05
Bacteria;Proteobacteria;Betaproteobacteria;Burkholderiales;Alcaligenaceae;Achromobacter;Achromobacter_arsenitoxydans	0	159	0	0	0	0	0	0	0	0.000301888	0	0	0	0	0	0
Bacteria;Proteobacteria;Gammaproteobacteria;Alteromonadales;Pseudoalteromonadaceae;Pseudoalteromonas;Pseudoalteromonas_sp_CO325X	0	0	0	159	0	0	0	0	0	0	0	0.000301829	0	0	0	0
Bacteria;Proteobacteria;Gammaproteobacteria;Pseudomonadales;Moraxellaceae;Acinetobacter;Acinetobacter_sp_51m	0	152	0	0	0	0	7	0	0	0.000288597	0	0	0	0	1.2673e-05	0
Bacteria;Proteobacteria;Gammaproteobacteria;Enterobacterales;Enterobacteriaceae;Citrobacter;Citrobacter_sp_AATXQ	0	0	0	86	0	0	0	72	0	0	0	0.000163253	0	0	0	0.000137794
Bacteria;Firmicutes;Bacilli;Lactobacillales;Lactobacillaceae;Lactobacillus;Lactobacillus_ginsenosidimutans	0	0	0	0	0	0	0	157	0	0	0	0	0	0	0	0.000300468
Bacteria;Proteobacteria;Gammaproteobacteria;Enterobacterales;Enterobacteriaceae;Enterobacter;Enterobacter_sp_ODB01	0	0	1	0	0	0	156	8	0	0	1.89702e-06	0	0	0	0.000282427	1.53105e-05
Bacteria;Proteobacteria;Gammaproteobacteria;Enterobacterales;Erwiniaceae;Pantoea;Pantoea_sp_PSNIH6	0	0	0	15	0	0	0	141.5	0	0	0	2.84744e-05	0	0	0	0.000270804
Bacteria;Proteobacteria;Gammaproteobacteria;Oceanospirillales;Oceanospirillaceae;Nitrincola;Nitrincola_schmidtii	0	157	0	0	0	0	0	0	0	0.00029809	0	0	0	0	0	0
Bacteria;Proteobacteria;Gammaproteobacteria;Enterobacterales;Yersiniaceae;Rouxiella;Rouxiella_chamberiensis	0	157	0	0	0	0	0	0	0	0.00029809	0	0	0	0	0	0
Bacteria;Firmicutes;Bacilli;Lactobacillales;Lactobacillaceae;Lactobacillus;Lactobacillus_senioris	0	156	0	0	0	0	0	0	0	0.000296192	0	0	0	0	0	0
Bacteria;Proteobacteria;Gammaproteobacteria;Pseudomonadales;Moraxellaceae;Acinetobacter;Acinetobacter_sp_ANC_5054	0	11	0	145	0	0	0	0	0	2.08853e-05	0	0.000275252	0	0	0	0
Bacteria;Proteobacteria;Gammaproteobacteria;Pseudomonadales;Moraxellaceae;Acinetobacter;Acinetobacter_variabilis	0	40	0	115	0	0	0	0	0	7.59466e-05	0	0.000218304	0	0	0	0
Bacteria;Proteobacteria;Gammaproteobacteria;Pseudomonadales;Pseudomonadaceae;Pseudomonas;Pseudomonas_sp_JV241A	0	25	53	52	0	0	23	0	0	4.74666e-05	0.000100542	9.87112e-05	0	0	4.16399e-05	0
Bacteria;Proteobacteria;Gammaproteobacteria;Enterobacterales;Yersiniaceae;Yersinia;Yersinia_intermedia	0	19	0	24	34	0	0	80	0	3.60746e-05	0	4.5559e-05	5.22209e-05	0	0	0.000153105
Bacteria;Proteobacteria;Gammaproteobacteria;Alteromonadales;Pseudoalteromonadaceae;Pseudoalteromonas;Pseudoalteromonas_sp_TB64	0	0	0	151	0	0	0	0	0	0	0	0.000286642	0	0	0	0
Bacteria;Firmicutes;Bacilli;Bacillales;Bacillaceae;Bacillus;Bacillus_coagulans	57	97	0	0	0	0	1	0	9.98686e-05	0.00018417	0	0	0	0	1.81043e-06	0
Bacteria;Proteobacteria;Betaproteobacteria;Neisseriales;Neisseriaceae;Alysiella;Alysiella_filiformis	0	0	0	144	0	0	0	5	0	0	0	0.000273354	0	0	0	9.56904e-06
Bacteria;Proteobacteria;Gammaproteobacteria;Enterobacterales;Enterobacteriaceae;Lelliottia;Lelliottia_nimipressuralis	0	7	130	0	0	0	0	12	0	1.32907e-05	0.000246612	0	0	0	0	2.29657e-05
Bacteria;Proteobacteria;Gammaproteobacteria;Enterobacterales;Enterobacteriaceae;Enterobacter;Enterobacter_sp_BIDMC92	0	0	115	0	0	0	0	33	0	0	0.000218157	0	0	0	0	6.31557e-05
Bacteria;Proteobacteria;Gammaproteobacteria;Pseudomonadales;Pseudomonadaceae;Pseudomonas;Pseudomonas_sp_TMW_21634	0	0	98	16	0	0	0	33	0	0	0.000185908	3.03727e-05	0	0	0	6.31557e-05
Bacteria;Firmicutes;Clostridia;Clostridiales;Clostridiaceae;Candidatus_Arthromitus;Candidatus_Arthromitus_sp_SFB-rat-Yit	1	0	5	115	15	7	0	7	1.75208e-06	0	9.48509e-06	0.000218304	2.30386e-05	1.03112e-05	0	1.33967e-05
Bacteria;Proteobacteria;Gammaproteobacteria;Enterobacterales;Erwiniaceae;Pantoea;Pantoea_sp_RIT_413	0	23	0	42	65	0	29	0	0	4.36693e-05	0	7.97283e-05	9.98341e-05	0	5.25025e-05	0
Bacteria;Proteobacteria;Gammaproteobacteria;Methylococcales;Methylococcales_noname;Methylococcales_noname;Methylococcales_symbiont_of_Iophon_sp_n_MRB-2018	0	0	0	145	0	0	0	0	0	0	0	0.000275252	0	0	0	0
Bacteria;Firmicutes;Bacilli;Lactobacillales;Streptococcaceae;Lactococcus;Lactococcus_plantarum	0	0	114	0	0	0	0	28	0	0	0.00021626	0	0	0	0	5.35866e-05
Bacteria;Proteobacteria;Gammaproteobacteria;Enterobacterales;Erwiniaceae;Tatumella;Tatumella_citrea	0	8	0	78	0	0	0	55	0	1.51893e-05	0	0.000148067	0	0	0	0.000105259
Bacteria;Firmicutes;Bacilli;Bacillales;Bacillaceae;Bacillus;Bacillus_clausii	11	131	0	0	0	0	0	0	1.92729e-05	0.000248725	0	0	0	0	0	0
Bacteria;Proteobacteria;Betaproteobacteria;Burkholderiales;Comamonadaceae;Hydrogenophaga;Hydrogenophaga_crassostreae	0	0	114	0	0	0	0	27	0	0	0.00021626	0	0	0	0	5.16728e-05
Bacteria;Proteobacteria;Gammaproteobacteria;Pseudomonadales;Pseudomonadaceae;Pseudomonas;Pseudomonas_caricapapayae	0	6	0	135	0	0	0	0	0	1.1392e-05	0	0.000256269	0	0	0	0
Bacteria;Proteobacteria;Gammaproteobacteria;Oceanospirillales;Halomonadaceae;Halomonas;Halomonas_salina	0	118	0	11	0	0	0	11	0	0.000224042	0	2.08812e-05	0	0	0	2.10519e-05
Bacteria;Proteobacteria;Gammaproteobacteria;Enterobacterales;Enterobacteriaceae;Escherichia;Escherichia_sp_ESNIH1	0	22	0	115	2	0	0	0	0	4.17706e-05	0	0.000218304	3.07182e-06	0	0	0
Bacteria;Proteobacteria;Epsilonproteobacteria;Campylobacterales;Helicobacteraceae;Sulfurimonas;Sulfurimonas_sp	0	0	4	0	7	165	0	0	0	0	7.58807e-06	0	1.07514e-05	0.00024305	0	0
Bacteria;Proteobacteria;Gammaproteobacteria;Pseudomonadales;Pseudomonadaceae;Pseudomonas;Pseudomonas_cannabina	0	0	0	137	0	0	0	0	0	0	0	0.000260066	0	0	0	0
Bacteria;Bacteroidetes;Flavobacteriia;Flavobacteriales;Flavobacteriaceae;Riemerella;Riemerella_columbina	0	0	0	130	5	0	0	0	0	0	0	0.000246778	7.67955e-06	0	0	0
Bacteria;Proteobacteria;Gammaproteobacteria;Chromatiales;Chromatiaceae;Thiocapsa;Thiocapsa_sp_KS1	0	23	0	4	0	0	0	104	0	4.36693e-05	0	7.59317e-06	0	0	0	0.000199036
Bacteria;Proteobacteria;Betaproteobacteria;Betaproteobacteria_noname;Betaproteobacteria_noname;Candidatus_Accumulibacter;Candidatus_Accumulibacter_aalborgensis	0	0	46	57	0	0	0	25	0	0	8.72629e-05	0.000108203	0	0	0	4.78452e-05
Bacteria;Proteobacteria;Betaproteobacteria;Burkholderiales;Burkholderiaceae;Paraburkholderia;Paraburkholderia_fungorum	0	12	7	8	4	1	96	5	0	2.2784e-05	1.32791e-05	1.51863e-05	6.14364e-06	1.47303e-06	0.000173801	9.56904e-06
Bacteria;Proteobacteria;Gammaproteobacteria;Pseudomonadales;Moraxellaceae;Acinetobacter;Acinetobacter_sp_NIPH_899	0	120	0	0	9	0	0	0	0	0.00022784	0	0	1.38232e-05	0	0	0
Bacteria;Proteobacteria;Gammaproteobacteria;Enterobacterales;Enterobacteriaceae;Escherichia;Escherichia_sp_MOD1-EC5350	0	0	0	0	157	0	0	0	0	0	0	0	0.000241138	0	0	0
Bacteria;Firmicutes;Bacilli;Lactobacillales;Lactobacillaceae;Lactobacillus;Lactobacillus_mucosae	3	112	0	0	15	0	0	0	5.25624e-06	0.00021265	0	0	2.30386e-05	0	0	0
Bacteria;Firmicutes;Bacilli;Lactobacillales;Lactobacillaceae;Lactobacillus;Lactobacillus_fuchuensis	0	0	0	0	0	0	0	125	0	0	0	0	0	0	0	0.000239226
Bacteria;Proteobacteria;Gammaproteobacteria;Pseudomonadales;Moraxellaceae;Acinetobacter;Acinetobacter_gandensis	0	98	0	26	0	0	0	1	0	0.000186069	0	4.93556e-05	0	0	0	1.91381e-06
Bacteria;Proteobacteria;Betaproteobacteria;Burkholderiales;Comamonadaceae;Polaromonas;Polaromonas_sp_CG9_12	0	0	0	0	0	0	0	123	0	0	0	0	0	0	0	0.000235398
Bacteria;Actinobacteria;Actinobacteria;Streptomycetales;Streptomycetaceae;Streptomyces;Streptomyces_sp_ADI91-18	0	0	0	124	0	0	0	0	0	0	0	0.000235388	0	0	0	0
Bacteria;Proteobacteria;Gammaproteobacteria;Pseudomonadales;Pseudomonadaceae;Pseudomonas;Pseudomonas_sp_R84	0	0	0	123	0	0	0	0	0	0	0	0.00023349	0	0	0	0
Bacteria;Proteobacteria;Gammaproteobacteria;Enterobacterales;Enterobacteriaceae;Citrobacter;Citrobacter_europaeus	0	10	109	0	0	0	0	4	0	1.89866e-05	0.000206775	0	0	0	0	7.65523e-06
Bacteria;Firmicutes;Bacilli;Lactobacillales;Lactobacillaceae;Lactobacillus;Lactobacillus_farraginis	0	0	0	0	0	0	0	120	0	0	0	0	0	0	0	0.000229657
Bacteria;Proteobacteria;Gammaproteobacteria;Pseudomonadales;Pseudomonadaceae;Pseudomonas;Pseudomonas_saudimassiliensis	1	120	0	0	0	0	0	0	1.75208e-06	0.00022784	0	0	0	0	0	0
Bacteria;Proteobacteria;Betaproteobacteria;Burkholderiales;Burkholderiaceae;Pandoraea;Pandoraea_terrae	0	0	18	93	0	0	0	7	0	0	3.41463e-05	0.000176541	0	0	0	1.33967e-05
Bacteria;Bacteroidetes;Cytophagia;Cytophagales;Hymenobacteraceae;Hymenobacter;Hymenobacter_sp_17J68-5	0	0	0	118	0	0	0	0	0	0	0	0.000223999	0	0	0	0
Bacteria;Proteobacteria;Gammaproteobacteria;Pseudomonadales;Moraxellaceae;Moraxella;Moraxella_sp	0	0	0	118	0	0	0	0	0	0	0	0.000223999	0	0	0	0
Bacteria;Proteobacteria;Gammaproteobacteria;Pseudomonadales;Moraxellaceae;Acinetobacter;Acinetobacter_sp_CIP_102136	0	111	0	0	8	0	0	0	0	0.000210752	0	0	1.22873e-05	0	0	0
Bacteria;Firmicutes;Bacilli;Lactobacillales;Lactobacillaceae;Lactobacillus;Lactobacillus_reuteri	2	71	0	1.5	41	5	2	4	3.50416e-06	0.000134805	0	2.84744e-06	6.29723e-05	7.36515e-06	3.62086e-06	7.65523e-06
Bacteria;Proteobacteria;Gammaproteobacteria;Pseudomonadales;Pseudomonadaceae;Pseudomonas;Pseudomonas_sp_VLB120	0	0	0	117	0	0	0	0	0	0	0	0.0002221	0	0	0	0
Bacteria;Proteobacteria;Betaproteobacteria;Burkholderiales;Alcaligenaceae;Achromobacter;Achromobacter_sp_2789STDY5608615	0	55	0	0	14	0	0	50	0	0.000104427	0	0	2.15027e-05	0	0	9.56904e-05
Bacteria;Actinobacteria;Actinobacteria;Micrococcales;Micrococcaceae;Micrococcus;Micrococcus_luteus	0	25	9	64	0	2	18	0	0	4.74666e-05	1.70732e-05	0.000121491	0	2.94606e-06	3.25877e-05	0
Bacteria;Proteobacteria;Gammaproteobacteria;Pseudomonadales;Moraxellaceae;Acinetobacter;Acinetobacter_sp_WCHA55	0.5	108	0	8	0	0	0	0	8.76041e-07	0.000205056	0	1.51863e-05	0	0	0	0
Bacteria;Proteobacteria;Gammaproteobacteria;Pseudomonadales;Pseudomonadaceae;Pseudomonas;Pseudomonas_koreensis	0	0	0	116	0	0	0	0	0	0	0	0.000220202	0	0	0	0
Bacteria;Proteobacteria;Betaproteobacteria;Burkholderiales;Burkholderiaceae;Burkholderia;Burkholderia_diffusa	0	115	0	0	0	0	0	0	0	0.000218346	0	0	0	0	0	0
Bacteria;Proteobacteria;Gammaproteobacteria;Pseudomonadales;Moraxellaceae;Acinetobacter;Acinetobacter_parvus	0	0	0	115	0	0	0	0	0	0	0	0.000218304	0	0	0	0
Bacteria;Proteobacteria;Betaproteobacteria;Burkholderiales;Comamonadaceae;Delftia;Delftia_tsuruhatensis	0	42	0	68	0	0	5	0	0	7.97439e-05	0	0.000129084	0	0	9.05215e-06	0
Bacteria;Proteobacteria;Gammaproteobacteria;Pseudomonadales;Pseudomonadaceae;Pseudomonas;Pseudomonas_monteilii	0	0	61	31	0	0	0	22	0	0	0.000115718	5.88471e-05	0	0	0	4.21038e-05
Bacteria;Proteobacteria;Betaproteobacteria;Burkholderiales;Comamonadaceae;Variovorax;Variovorax_sp	0	37	0	66	0	0	0	11	0	7.02506e-05	0	0.000125287	0	0	0	2.10519e-05
Bacteria;Firmicutes;Bacilli;Lactobacillales;Leuconostocaceae;Oenococcus;Oenococcus_oeni	0	100	0	0	7	3	0	6	0	0.000189866	0	0	1.07514e-05	4.41909e-06	0	1.14828e-05
Bacteria;Proteobacteria;Gammaproteobacteria;Enterobacterales;Yersiniaceae;Rahnella;Rahnella_inusitata	0	46	0	0	0	0	0	67	0	8.73386e-05	0	0	0	0	0	0.000128225
Bacteria;Firmicutes;Clostridia;Clostridiales;Ruminococcaceae;Flavonifractor;Flavonifractor_plautii	0	113	0	0	0	0	0	0	0	0.000214549	0	0	0	0	0	0
Bacteria;Proteobacteria;Gammaproteobacteria;Enterobacterales;Yersiniaceae;Rahnella;Rahnella_variigena	0	20	0	0	0	0	0	91	0	3.79733e-05	0	0	0	0	0	0.000174157
Bacteria;Firmicutes;Bacilli;Lactobacillales;Carnobacteriaceae;Jeotgalibaca;Jeotgalibaca_porci	0	31	0	64	5	4	10	0	0	5.88586e-05	0	0.000121491	7.67955e-06	5.89212e-06	1.81043e-05	0
Bacteria;Proteobacteria;Gammaproteobacteria;Enterobacterales;Enterobacteriaceae;Klebsiella;Klebsiella_quasivariicola	5	40	0	7	0	0	0	59	8.76041e-06	7.59466e-05	0	1.3288e-05	0	0	0	0.000112915
Bacteria;Proteobacteria;Betaproteobacteria;Burkholderiales;Alcaligenaceae;Bordetella;Bordetella_bronchiseptica	0	111	0	0	0	0	0	0	0	0.000210752	0	0	0	0	0	0
Bacteria;Proteobacteria;Gammaproteobacteria;Enterobacterales;Enterobacteriaceae;Atlantibacter;Atlantibacter_subterranea	0	83	0	25	3	0	0	0	0	0.000157589	0	4.74573e-05	4.60773e-06	0	0	0
Bacteria;Firmicutes;Clostridia;Clostridiales;Clostridiales_noname;Clostridiales_noname;Clostridiales_bacterium	5	105	0	0	0	0	0	0	8.76041e-06	0.00019936	0	0	0	0	0	0
Bacteria;Proteobacteria;Gammaproteobacteria;Enterobacterales;Enterobacteriaceae;Enterobacter;Enterobacter_sp_50588862	0	0	88	0	0	0	0	21	0	0	0.000166938	0	0	0	0	4.019e-05
Bacteria;Proteobacteria;Gammaproteobacteria;Enterobacterales;Yersiniaceae;Yersinia;Yersinia_kristensenii	0	12	0	0	21	0	0	78	0	2.2784e-05	0	0	3.22541e-05	0	0	0.000149277
Bacteria;Bacteroidetes;Cytophagia;Cytophagales;Hymenobacteraceae;Hymenobacter;Hymenobacter_sp	0	0	0	107	0	0	0	0	0	0	0	0.000203117	0	0	0	0
Bacteria;Proteobacteria;Gammaproteobacteria;Enterobacterales;Erwiniaceae;Erwinia;Erwinia_typographi	5	46	0	56	0	0	0	0	8.76041e-06	8.73386e-05	0	0.000106304	0	0	0	0
Bacteria;Proteobacteria;Gammaproteobacteria;Pseudomonadales;Moraxellaceae;Acinetobacter;Acinetobacter_sp_ANC_4169	0	22	0	80	0	0	0	3	0	4.17706e-05	0	0.000151863	0	0	0	5.74142e-06
Bacteria;Proteobacteria;Gammaproteobacteria;Cellvibrionales;Cellvibrionaceae;Cellvibrio;Cellvibrio_sp_YR554	0	0	0	105	0	0	0	0	0	0	0	0.000199321	0	0	0	0
Bacteria;Proteobacteria;Betaproteobacteria;Neisseriales;Neisseriaceae;Prolinoborus;Prolinoborus_fasciculus	0	104	0	0	1	0	0	0	0	0.000197461	0	0	1.53591e-06	0	0	0
Bacteria;Proteobacteria;Gammaproteobacteria;Aeromonadales;Aeromonadaceae;Tolumonas;Tolumonas_auensis	0	5	0	90	0	0	0	9	0	9.49332e-06	0	0.000170846	0	0	0	1.72243e-05
Bacteria;Firmicutes;Bacilli;Lactobacillales;Lactobacillaceae;Lactobacillus;Lactobacillus_sp_187-3	0	74	0	0	30	7	0	0	0	0.000140501	0	0	4.60773e-05	1.03112e-05	0	0
Bacteria;Proteobacteria;Gammaproteobacteria;Enterobacterales;Enterobacteriaceae;Escherichia;Escherichia_sp_E4694	0	0	0	0	128	0	0	0	0	0	0	0	0.000196596	0	0	0
Bacteria;Bacteroidetes;Flavobacteriia;Flavobacteriales;Flavobacteriaceae;Maribacter;Maribacter_sedimenticola	0	0	0	69	31	0	0	9	0	0	0	0.000130982	4.76132e-05	0	0	1.72243e-05
Bacteria;Proteobacteria;Gammaproteobacteria;Pseudomonadales;Pseudomonadaceae;Pseudomonas;Pseudomonas_sp_Chol1	0	103	0	0	0	0	0	0	0	0.000195562	0	0	0	0	0	0
Bacteria;Proteobacteria;Gammaproteobacteria;Enterobacterales;Pectobacteriaceae;Sodalis;Sodalis_glossinidius	0	0	0	103	0	0	0	0	0	0	0	0.000195524	0	0	0	0
Bacteria;Proteobacteria;Gammaproteobacteria;Pseudomonadales;Pseudomonadaceae;Pseudomonas;Pseudomonas_stutzeri	0	0	88	9	0	0	0	6	0	0	0.000166938	1.70846e-05	0	0	0	1.14828e-05
Bacteria;Proteobacteria;Gammaproteobacteria;Enterobacterales;Enterobacteriaceae;Enterobacter;Enterobacter_soli	0	0	0	0	125	0	0	0	0	0	0	0	0.000191989	0	0	0
Bacteria;Firmicutes;Bacilli;Bacillales;Bacillaceae;Bacillus;Bacillus_circulans	0	0	0	101	0	0	0	0	0	0	0	0.000191728	0	0	0	0
Bacteria;Proteobacteria;Gammaproteobacteria;Alteromonadales;Pseudoalteromonadaceae;Pseudoalteromonas;Pseudoalteromonas_sp_S3260	0	0	0	101	0	0	0	0	0	0	0	0.000191728	0	0	0	0
Bacteria;Proteobacteria;Gammaproteobacteria;Pseudomonadales;Pseudomonadaceae;Pseudomonas;Pseudomonas_sp_GZJR-8	0	0	101	0	0	0	0	0	0	0	0.000191599	0	0	0	0	0
Bacteria;Proteobacteria;Betaproteobacteria;Burkholderiales;Alcaligenaceae;Achromobacter;Achromobacter_sp_2789STDY5608628	0	64	0	0	0	0	0	36	0	0.000121515	0	0	0	0	0	6.88971e-05
Bacteria;Proteobacteria;Gammaproteobacteria;Pseudomonadales;Pseudomonadaceae;Pseudomonas;Pseudomonas_kilonensis	0	4	0	96	0	0	0	0	0	7.59466e-06	0	0.000182236	0	0	0	0
Bacteria;Firmicutes;Bacilli;Lactobacillales;Enterococcaceae;Enterococcus;Enterococcus_diestrammenae	0	0	0	100	0	0	0	0	0	0	0	0.000189829	0	0	0	0
Bacteria;Firmicutes;Bacilli;Bacillales;Bacillaceae;Virgibacillus;Virgibacillus_indicus	5	95	0	0	0	0	0	0	8.76041e-06	0.000180373	0	0	0	0	0	0
Bacteria;Bacteroidetes;Flavobacteriia;Flavobacteriales;Flavobacteriaceae;Chryseobacterium;Chryseobacterium_carnis	0	0	0	99	0	0	0	0	0	0	0	0.000187931	0	0	0	0
Bacteria;Firmicutes;Clostridia;Clostridiales;Clostridiaceae;Youngiibacter;Youngiibacter_fragilis	0	0	0	99	0	0	0	0	0	0	0	0.000187931	0	0	0	0
Bacteria;Actinobacteria;Actinobacteria;Micrococcales;Micrococcaceae;Kocuria;Kocuria_salsicia	0	0	0	98	0	0	0	0	0	0	0	0.000186033	0	0	0	0
Bacteria;Lentisphaerae;Lentisphaerae_noname;Lentisphaerae_noname;Lentisphaerae_noname;Lentisphaerae_noname;Lentisphaerae_bacterium_ADurbBinA184	5	91	2	0	0	0	0	0	8.76041e-06	0.000172778	3.79404e-06	0	0	0	0	0
Bacteria;Proteobacteria;Gammaproteobacteria;Enterobacterales;Yersiniaceae;Yersinia;Yersinia_ruckeri	0	0	0	15.5	0	0	0	81	0	0	0	2.94235e-05	0	0	0	0.000155018
Bacteria;Proteobacteria;Gammaproteobacteria;Enterobacterales;Enterobacteriaceae;Enterobacter;Enterobacter_chuandaensis	0	0	2	90	0	0	0	5	0	0	3.79404e-06	0.000170846	0	0	0	9.56904e-06
Bacteria;Proteobacteria;Gammaproteobacteria;Alteromonadales;Alteromonadaceae;Alteromonas;Alteromonas_confluentis	0	0	0	97	0	0	0	0	0	0	0	0.000184134	0	0	0	0
Bacteria;Proteobacteria;Betaproteobacteria;Burkholderiales;Alcaligenaceae;Oligella;Oligella_sp_HMSC05A10	0	0	0	97	0	0	0	0	0	0	0	0.000184134	0	0	0	0
Bacteria;Proteobacteria;Gammaproteobacteria;Pseudomonadales;Pseudomonadaceae;Pseudomonas;Pseudomonas_sp_Irchel_s3f19	0	0	91	0	0	0	0	6	0	0	0.000172629	0	0	0	0	1.14828e-05
Bacteria;Proteobacteria;Gammaproteobacteria;Pseudomonadales;Pseudomonadaceae;Pseudomonas;Pseudomonas_sp_B15(2017)	0	0	97	0	0	0	0	0	0	0	0.000184011	0	0	0	0	0
Bacteria;Proteobacteria;Gammaproteobacteria;Vibrionales;Vibrionaceae;Vibrio;Vibrio_casei	0	0	0	7	7	0	88	0	0	0	0	1.3288e-05	1.07514e-05	0	0.000159318	0
Bacteria;Firmicutes;Bacilli;Bacillales;Bacillaceae;Bacillus;Bacillus_sp_AFS040349	0	0	0	96	0	0	0	0	0	0	0	0.000182236	0	0	0	0
Bacteria;Proteobacteria;Gammaproteobacteria;Enterobacterales;Pectobacteriaceae;Dickeya;Dickeya_dadantii	0	81	0	0	18	0	0	0	0	0.000153792	0	0	2.76464e-05	0	0	0
Bacteria;Actinobacteria;Actinobacteria;Streptomycetales;Streptomycetaceae;Streptomyces;Streptomyces_sp_NL15-2K	0	0	0	95	0	0	0	0	0	0	0	0.000180338	0	0	0	0
Bacteria;Proteobacteria;Betaproteobacteria;Burkholderiales;Burkholderiaceae;Burkholderia;Burkholderia_plantarii	0	14	0	53	34	0	0	0	0	2.65813e-05	0	0.00010061	5.22209e-05	0	0	0
Bacteria;Proteobacteria;Gammaproteobacteria;Pseudomonadales;Moraxellaceae;Acinetobacter;Acinetobacter_sp_SFA	0	45	0	49	0	0	0	0	0	8.54399e-05	0	9.30163e-05	0	0	0	0
Bacteria;Proteobacteria;Gammaproteobacteria;Enterobacterales;Yersiniaceae;Serratia;Serratia_sp_14-2641	0	0	0	0	116	0	0	0	0	0	0	0	0.000178166	0	0	0
Bacteria;Proteobacteria;Epsilonproteobacteria;Campylobacterales;Campylobacteraceae;Campylobacter;Campylobacter_showae	0	0	9	74	7	0	5	0	0	0	1.70732e-05	0.000140474	1.07514e-05	0	9.05215e-06	0
Bacteria;Proteobacteria;Gammaproteobacteria;Enterobacterales;Pectobacteriaceae;Pectobacterium;Pectobacterium_polaris	0	0	0	93	0	0	0	0	0	0	0	0.000176541	0	0	0	0
Bacteria;Proteobacteria;Gammaproteobacteria;Enterobacterales;Enterobacteriaceae;Escherichia;Escherichia_sp_E3659	0	0	0	0	42	0	46	15	0	0	0	0	6.45082e-05	0	8.32798e-05	2.87071e-05
Bacteria;Proteobacteria;Gammaproteobacteria;Enterobacterales;Enterobacteriaceae;Kosakonia;Kosakonia_oryziphila	0	10	0	0	36	0	0	53	0	1.89866e-05	0	0	5.52927e-05	0	0	0.000101432
Bacteria;Proteobacteria;Gammaproteobacteria;Pseudomonadales;Moraxellaceae;Acinetobacter;Acinetobacter_sp_MN12	0	0	0	92	0	0	0	0	0	0	0	0.000174643	0	0	0	0
Bacteria;Proteobacteria;Gammaproteobacteria;Enterobacterales;Enterobacteriaceae;Salmonella;Salmonella_bongori	0	0	2	44	56	0	0	0	0	0	3.79404e-06	8.35249e-05	8.60109e-05	0	0	0
Bacteria;Proteobacteria;Gammaproteobacteria;Pseudomonadales;Moraxellaceae;Acinetobacter;Acinetobacter_lactucae	0	0	0	91	0	0	0	0	0	0	0	0.000172745	0	0	0	0
Bacteria;Actinobacteria;Actinobacteria;Streptomycetales;Streptomycetaceae;Streptomyces;Streptomyces_viridifaciens	0	0	0	91	0	0	0	0	0	0	0	0.000172745	0	0	0	0
Bacteria;Proteobacteria;Gammaproteobacteria;Vibrionales;Vibrionaceae;Vibrio;Vibrio_alginolyticus	0	0	9	44	0	0	31	8	0	0	1.70732e-05	8.35249e-05	0	0	5.61233e-05	1.53105e-05
Bacteria;Chlamydiae;Chlamydiia;Chlamydiales;Chlamydiaceae;Chlamydia;Chlamydia_abortus	0	24	1	0	78	3	0	0	0	4.55679e-05	1.89702e-06	0	0.000119801	4.41909e-06	0	0
Bacteria;Proteobacteria;Gammaproteobacteria;Pseudomonadales;Pseudomonadaceae;Pseudomonas;Pseudomonas_sp_GR_6-02	0	0	0	88	0	0	2	0	0	0	0	0.00016705	0	0	3.62086e-06	0
Bacteria;Proteobacteria;Betaproteobacteria;Burkholderiales;Alcaligenaceae;Achromobacter;Achromobacter_denitrificans	0	89	0	0	0	0	0	0	0	0.000168981	0	0	0	0	0	0
Bacteria;Proteobacteria;Gammaproteobacteria;Pseudomonadales;Moraxellaceae;Acinetobacter;Acinetobacter_sp_Ver3	0	10	0	79	0	0	0	0	0	1.89866e-05	0	0.000149965	0	0	0	0
Bacteria;Proteobacteria;Gammaproteobacteria;Enterobacterales;Enterobacteriaceae;Citrobacter;Citrobacter_sp_MGH109	0	0	0	0	0	0	0	88	0	0	0	0	0	0	0	0.000168415
Bacteria;Proteobacteria;Gammaproteobacteria;Vibrionales;Vibrionaceae;Photobacterium;Photobacterium_damselae	6	71	0	6	0	0	0	6	1.05125e-05	0.000134805	0	1.13898e-05	0	0	0	1.14828e-05
Bacteria;Firmicutes;Bacilli;Lactobacillales;Lactobacillaceae;Lactobacillus;Lactobacillus_siliginis	0	82	1	0	0	7	0	0	0	0.00015569	1.89702e-06	0	0	1.03112e-05	0	0
Bacteria;Proteobacteria;Gammaproteobacteria;Pseudomonadales;Pseudomonadaceae;Pseudomonas;Pseudomonas_sp_RW407	0	88	0	0	0	0	0	0	0	0.000167082	0	0	0	0	0	0
Bacteria;Proteobacteria;Gammaproteobacteria;Enterobacterales;Enterobacteriaceae;Escherichia;Escherichia_sp_MOD1-EC2449	0	0	76	0	0	0	0	11	0	0	0.000144173	0	0	0	0	2.10519e-05
Bacteria;Actinobacteria;Actinobacteria;Micrococcales;Micrococcaceae;Kocuria;Kocuria_gwangalliensis	0	0	9	54	0	0	25	0	0	0	1.70732e-05	0.000102508	0	0	4.52607e-05	0
Bacteria;Proteobacteria;Gammaproteobacteria;Enterobacterales;Erwiniaceae;Pantoea;Pantoea_sp_OV426	0	0	0	80	8	0	0	0	0	0	0	0.000151863	1.22873e-05	0	0	0
Bacteria;Proteobacteria;Gammaproteobacteria;Enterobacterales;Erwiniaceae;Pantoea;Pantoea_alhagi	0	0	0	86	0	0	0	0	0	0	0	0.000163253	0	0	0	0
Bacteria;Proteobacteria;Epsilonproteobacteria;Campylobacterales;Helicobacteraceae;Helicobacter;Helicobacter_anseris	0	0	5	0	1	103	0	0	0	0	9.48509e-06	0	1.53591e-06	0.000151722	0	0
Bacteria;Actinobacteria;Actinobacteria;Streptomycetales;Streptomycetaceae;Streptomyces;Streptomyces_rochei	0	21	0	0	0	0	0	64	0	3.9872e-05	0	0	0	0	0	0.000122484
Bacteria;Proteobacteria;Gammaproteobacteria;Pseudomonadales;Pseudomonadaceae;Pseudomonas;Pseudomonas_sp_63_8	0	0	22	57	0	0	0	6	0	0	4.17344e-05	0.000108203	0	0	0	1.14828e-05
Bacteria;Proteobacteria;Betaproteobacteria;Burkholderiales;Burkholderiaceae;Burkholderia;Burkholderia_ambifaria	0	56	0	29	0	0	0	0	0	0.000106325	0	5.50505e-05	0	0	0	0
Bacteria;Proteobacteria;Gammaproteobacteria;Enterobacterales;Pectobacteriaceae;Dickeya;Dickeya_zeae	0	0	0	63	27	0	0	0	0	0	0	0.000119592	4.14696e-05	0	0	0
Bacteria;Proteobacteria;Gammaproteobacteria;Pseudomonadales;Moraxellaceae;Acinetobacter;Acinetobacter_sp_WCHA29	0	10	0	69	0	0	0	5	0	1.89866e-05	0	0.000130982	0	0	0	9.56904e-06
Bacteria;Proteobacteria;Gammaproteobacteria;Enterobacterales;Erwiniaceae;Erwinia;Erwinia_piriflorinigrans	0	0	0	84	0	0	0	0	0	0	0	0.000159457	0	0	0	0
Bacteria;Proteobacteria;Gammaproteobacteria;Enterobacterales;Erwiniaceae;Pantoea;Pantoea_sp_JKS000250	0	0	0	84	0	0	0	0	0	0	0	0.000159457	0	0	0	0
Bacteria;Proteobacteria;Gammaproteobacteria;Pseudomonadales;Moraxellaceae;Acinetobacter;Acinetobacter_sp_WCHAc060115	0	3	0	80	0	0	1	0	0	5.69599e-06	0	0.000151863	0	0	1.81043e-06	0
Bacteria;Firmicutes;Tissierellia;Tissierellales;Peptoniphilaceae;Anaerococcus;Anaerococcus_hydrogenalis	0	5	62	0	16	5	0	0	0	9.49332e-06	0.000117615	0	2.45746e-05	7.36515e-06	0	0
Bacteria;Proteobacteria;Gammaproteobacteria;Pseudomonadales;Moraxellaceae;Acinetobacter;Acinetobacter_sp_WCHAc060042	0	83	0	0	0	0	0	0	0	0.000157589	0	0	0	0	0	0
Bacteria;Proteobacteria;Gammaproteobacteria;Enterobacterales;Yersiniaceae;Rahnella;Rahnella_aquatilis	0	72	0	0	0	0	0	10.5	0	0.000136704	0	0	0	0	0	2.0095e-05
Bacteria;Firmicutes;Bacilli;Lactobacillales;Lactobacillaceae;Lactobacillus;Lactobacillus_spicheri	3	51	0	0	25	1	8	0	5.25624e-06	9.68319e-05	0	0	3.83977e-05	1.47303e-06	1.44834e-05	0
Bacteria;Proteobacteria;Alphaproteobacteria;Rhizobiales;Rhizobiaceae;Sinorhizobium;Sinorhizobium_sp_NP1	0	17	0	65	0	0	0	0	0	3.22773e-05	0	0.000123389	0	0	0	0
Bacteria;Firmicutes;Bacilli;Lactobacillales;Lactobacillaceae;Lactobacillus;Lactobacillus_ingluviei	67	0	4	0	0	16	0	3	0.000117389	0	7.58807e-06	0	0	2.35685e-05	0	5.74142e-06
Bacteria;Proteobacteria;Gammaproteobacteria;Pseudomonadales;Pseudomonadaceae;Pseudomonas;Pseudomonas_synxantha	0	0	66	0	0	0	0	15	0	0	0.000125203	0	0	0	0	2.87071e-05
Bacteria;Proteobacteria;Gammaproteobacteria;Pseudomonadales;Moraxellaceae;Acinetobacter;Acinetobacter_sp_P8-3-8	0	0	0	76	0	0	0	5	0	0	0	0.00014427	0	0	0	9.56904e-06
Bacteria;Proteobacteria;Betaproteobacteria;Burkholderiales;Alcaligenaceae;Bordetella;Bordetella_sp_N	0	81	0	0	0	0	0	0	0	0.000153792	0	0	0	0	0	0
Bacteria;Proteobacteria;Gammaproteobacteria;Oceanospirillales;Halomonadaceae;Halomonas;Halomonas_sp_A11-A	0	81	0	0	0	0	0	0	0	0.000153792	0	0	0	0	0	0
Bacteria;Candidatus_Sumerlaeota;Candidatus_Sumerlaeota_noname;Candidatus_Sumerlaeota_noname;Candidatus_Sumerlaeota_noname;Candidatus_Sumerlaeota_noname;candidate_division_BRC1_bacterium_ADurbBinA292	0	67	0	14	0	0	0	0	0	0.000127211	0	2.65761e-05	0	0	0	0
Bacteria;Cyanobacteria;Cyanobacteria_noname;Cyanobacteria_noname;Cyanobacteria_noname;Cyanobacteria_noname;cyanobacterium_TDX16	0	0	0	0	0	0	0	80	0	0	0	0	0	0	0	0.000153105
Bacteria;Firmicutes;Bacilli;Lactobacillales;Leuconostocaceae;Weissella;Weissella_cibaria	0	0	0	73	1	1	0	6	0	0	0	0.000138575	1.53591e-06	1.47303e-06	0	1.14828e-05
Bacteria;Actinobacteria;Actinobacteria;Bifidobacteriales;Bifidobacteriaceae;Bifidobacterium;Bifidobacterium_longum	0	14	0	3	0	0	0	63	0	2.65813e-05	0	5.69488e-06	0	0	0	0.00012057
Bacteria;Firmicutes;Clostridia;Clostridiales;Peptostreptococcaceae;Peptostreptococcus;Peptostreptococcus_russellii	5	43	0	26	8	0.5	0	0	8.76041e-06	8.16426e-05	0	4.93556e-05	1.22873e-05	7.36515e-07	0	0
Bacteria;Proteobacteria;Gammaproteobacteria;Enterobacterales;Enterobacteriaceae;Pluralibacter;[Enterobacter]_lignolyticus	0	0	0	5	0	0	0	74	0	0	0	9.49146e-06	0	0	0	0.000141622
Bacteria;Proteobacteria;Betaproteobacteria;Betaproteobacteria_noname;Betaproteobacteria_noname;Candidatus_Accumulibacter;Candidatus_Accumulibacter_sp_BA-94	0	46	5	4	30	0	0	0	0	8.73386e-05	9.48509e-06	7.59317e-06	4.60773e-05	0	0	0
Bacteria;Proteobacteria;Gammaproteobacteria;Enterobacterales;Enterobacteriaceae;Klebsiella;Klebsiella_sp_Kd70_TUC-EEAOC	1	53	0	0	0	0	0	25	1.75208e-06	0.000100629	0	0	0	0	0	4.78452e-05
Bacteria;Actinobacteria;Actinobacteria;Micrococcales;Micrococcaceae;Kocuria;Kocuria_palustris	0	0	0	56	0	0	24	0	0	0	0	0.000106304	0	0	4.34503e-05	0
Bacteria;Proteobacteria;Gammaproteobacteria;Enterobacterales;Enterobacteriaceae;Citrobacter;Citrobacter_sp_CFNIH10	0	0	71	0	0	0	0	7	0	0	0.000134688	0	0	0	0	1.33967e-05
Bacteria;Proteobacteria;Gammaproteobacteria;Pseudomonadales;Moraxellaceae;Acinetobacter;Acinetobacter_sp_ANC_4204	0	26	0	52	0	0	0	0	0	4.93653e-05	0	9.87112e-05	0	0	0	0
Bacteria;Proteobacteria;Betaproteobacteria;Burkholderiales;Burkholderiaceae;Burkholderia;Burkholderia_multivorans	0	0	0	78	0	0	0	0	0	0	0	0.000148067	0	0	0	0
Bacteria;Proteobacteria;Gammaproteobacteria;Gammaproteobacteria_noname;Gammaproteobacteria_noname;Gammaproteobacteria_noname;gamma_proteobacterium_L18	0	77	0	0	0	0	0	0	0	0.000146197	0	0	0	0	0	0
Bacteria;Bacteroidetes;Cytophagia;Cytophagales;Hymenobacteraceae;Hymenobacter;Hymenobacter_sp_ELS1360	0	0	0	77	0	0	0	0	0	0	0	0.000146169	0	0	0	0
Bacteria;Proteobacteria;Betaproteobacteria;Neisseriales;Neisseriaceae;Neisseria;Neisseria_sicca	0	0	0	76	0	0	0	0	0	0	0	0.00014427	0	0	0	0
Bacteria;Verrucomicrobia;Verrucomicrobia_noname;Verrucomicrobia_noname;Verrucomicrobia_noname;Verrucomicrobia_noname;Verrucomicrobia_bacterium_ADurbBin122	0	0	0	76	0	0	0	0	0	0	0	0.00014427	0	0	0	0
Bacteria;Proteobacteria;Gammaproteobacteria;Pseudomonadales;Moraxellaceae;Moraxella;Moraxella_caprae	0	0	0	74	0	0	2	0	0	0	0	0.000140474	0	0	3.62086e-06	0
Bacteria;Proteobacteria;Gammaproteobacteria;Oceanospirillales;Oceanospirillaceae;Oleibacter;Oleibacter_marinus	0	0	1	73	0	0	2	0	0	0	1.89702e-06	0.000138575	0	0	3.62086e-06	0
Bacteria;Proteobacteria;Gammaproteobacteria;Enterobacterales;Morganellaceae;Arsenophonus;Arsenophonus_sp_ENCA	0	0	0	0	0	0	0	75	0	0	0	0	0	0	0	0.000143536
Bacteria;Firmicutes;Bacilli;Lactobacillales;Enterococcaceae;Enterococcus;Enterococcus_canintestini	10	66	0	0	0	0	0	0	1.75208e-05	0.000125312	0	0	0	0	0	0
Bacteria;Actinobacteria;Actinobacteria;Streptomycetales;Streptomycetaceae;Streptomyces;Streptomyces_bingchenggensis	0	0	32	30	0	0	0	13	0	0	6.07046e-05	5.69488e-05	0	0	0	2.48795e-05
Bacteria;Proteobacteria;Betaproteobacteria;Burkholderiales;Burkholderiaceae;Burkholderia;Burkholderia_catarinensis	0	0	21	48	0	0	0	6	0	0	3.98374e-05	9.1118e-05	0	0	0	1.14828e-05
Bacteria;Proteobacteria;Betaproteobacteria;Burkholderiales;Alcaligenaceae;Achromobacter;Achromobacter_sp_2789STDY5608625	0	20	0	55	0	0	0	0	0	3.79733e-05	0	0.000104406	0	0	0	0
Bacteria;Proteobacteria;Deltaproteobacteria;Syntrophobacterales;Syntrophaceae;Syntrophus;Syntrophus_sp_PtaU1Bin208	0	0	75	0	0	0	0	0	0	0	0.000142276	0	0	0	0	0
Bacteria;Proteobacteria;Betaproteobacteria;Burkholderiales;Alcaligenaceae;Achromobacter;Achromobacter_sp_CanR-33	0	74.5	0	0	0	0	0	0	0	0.000141451	0	0	0	0	0	0
Bacteria;Proteobacteria;Gammaproteobacteria;Pseudomonadales;Moraxellaceae;Acinetobacter;Acinetobacter_sp_ANC_4558	0	10	0	50	0	0	0	14	0	1.89866e-05	0	9.49146e-05	0	0	0	2.67933e-05
Bacteria;Proteobacteria;Gammaproteobacteria;Pasteurellales;Pasteurellaceae;Rodentibacter;Rodentibacter_pneumotropicus	0	0	0	74	0	0	0	0	0	0	0	0.000140474	0	0	0	0
Bacteria;Proteobacteria;Gammaproteobacteria;Pseudomonadales;Pseudomonadaceae;Pseudomonas;Pseudomonas_sp_URMO17WK12:I11	0	0	72	0	0	0	0	2	0	0	0.000136585	0	0	0	0	3.82762e-06
Bacteria;Proteobacteria;Gammaproteobacteria;Alteromonadales;Alteromonadaceae;Alteromonas;Alteromonas_sp_RKMC-009	0	0	0	72	0	0	0	0	0	0	0	0.000136677	0	0	0	0
Bacteria;Actinobacteria;Actinobacteria;Corynebacteriales;Corynebacteriaceae;Corynebacterium;Corynebacterium_diphtheriae	0	0	0	72	0	0	0	0	0	0	0	0.000136677	0	0	0	0
Bacteria;Firmicutes;Bacilli;Lactobacillales;Enterococcaceae;Enterococcus;Enterococcus_durans	0	0	0	72	0	0	0	0	0	0	0	0.000136677	0	0	0	0
Bacteria;Bacteroidetes;Cytophagia;Cytophagales;Hymenobacteraceae;Hymenobacter;Hymenobacter_rubripertinctus	0	0	0	72	0	0	0	0	0	0	0	0.000136677	0	0	0	0
Bacteria;Proteobacteria;Betaproteobacteria;Burkholderiales;Alcaligenaceae;Oligella;Oligella_urethralis	0	0	0	0	0	0	75	0	0	0	0	0	0	0	0.000135782	0
Bacteria;Proteobacteria;Gammaproteobacteria;Pseudomonadales;Moraxellaceae;Acinetobacter;Acinetobacter_sp_WCHAc010005	0	23.5	0	48	0	0	0	0	0	4.46186e-05	0	9.1118e-05	0	0	0	0
Bacteria;Proteobacteria;Gammaproteobacteria;Aeromonadales;Aeromonadaceae;Aeromonas;Aeromonas_dhakensis	0	46	0	0	26	3	0	2	0	8.73386e-05	0	0	3.99336e-05	4.41909e-06	0	3.82762e-06
Bacteria;Proteobacteria;Epsilonproteobacteria;Campylobacterales;Helicobacteraceae;Helicobacter;Helicobacter_brantae	0	0	5	0	6	79	0	0	0	0	9.48509e-06	0	9.21546e-06	0.000116369	0	0
Bacteria;Proteobacteria;Gammaproteobacteria;Pseudomonadales;Moraxellaceae;Acinetobacter;Acinetobacter_sp_ANC_5318	0	71	0	0	0	0	0	0	0	0.000134805	0	0	0	0	0	0
Bacteria;Proteobacteria;Gammaproteobacteria;Enterobacterales;Yersiniaceae;Rahnella;Rahnella_sp_JUb53	0	71	0	0	0	0	0	0	0	0.000134805	0	0	0	0	0	0
Bacteria;Proteobacteria;Gammaproteobacteria;Aeromonadales;Aeromonadaceae;Aeromonas;Aeromonas_rivipollensis	0	61	0	10	0	0	0	0	0	0.000115819	0	1.89829e-05	0	0	0	0
Bacteria;Proteobacteria;Gammaproteobacteria;Pseudomonadales;Moraxellaceae;Moraxellaceae_noname;Moraxellaceae_bacterium	0	0	0	71	0	0	0	0	0	0	0	0.000134779	0	0	0	0
Bacteria;Proteobacteria;Gammaproteobacteria;Enterobacterales;Enterobacteriaceae;Cedecea;Cedecea_lapagei	0	0	58	13	0	0	0	0	0	0	0.000110027	2.46778e-05	0	0	0	0
Bacteria;Proteobacteria;Gammaproteobacteria;Pseudomonadales;Pseudomonadaceae;Pseudomonas;Pseudomonas_sp_XWY-1	0	0	71	0	0	0	0	0	0	0	0.000134688	0	0	0	0	0
Bacteria;Proteobacteria;Gammaproteobacteria;Pseudomonadales;Moraxellaceae;Acinetobacter;Acinetobacter_sp_FDAARGOS_515	0	14	0	55	2	0	0	0	0	2.65813e-05	0	0.000104406	3.07182e-06	0	0	0
Bacteria;Firmicutes;Bacilli;Lactobacillales;Lactobacillaceae;Lactobacillus;Lactobacillus_rennini	0	0	0	0	0	0	0	70	0	0	0	0	0	0	0	0.000133967
Bacteria;Actinobacteria;Actinobacteria;Kineosporiales;Kineosporiaceae;Quadrisphaera;Quadrisphaera_sp_DSM_44207	0	0	5	51	0	1	14	0	0	0	9.48509e-06	9.68129e-05	0	1.47303e-06	2.5346e-05	0
Bacteria;Proteobacteria;Gammaproteobacteria;Pseudomonadales;Moraxellaceae;Moraxella;Moraxella_caviae	0	0	0	70	0	0	0	0	0	0	0	0.00013288	0	0	0	0
Bacteria;Proteobacteria;Gammaproteobacteria;Aeromonadales;Aeromonadaceae;Tolumonas;Tolumonas_sp	0	0	0	0	0	0	0	69	0	0	0	0	0	0	0	0.000132053
Bacteria;Bacteroidetes;Cytophagia;Cytophagales;Hymenobacteraceae;Hymenobacter;Hymenobacter_sp_MIMBbqt21	0	0	0	69	0	0	0	0	0	0	0	0.000130982	0	0	0	0
Bacteria;Proteobacteria;Gammaproteobacteria;Enterobacterales;Enterobacteriaceae;Escherichia;Escherichia_sp_E1130	0	38	7	5	0	5	2	13	0	7.21493e-05	1.32791e-05	9.49146e-06	0	7.36515e-06	3.62086e-06	2.48795e-05
Bacteria;Proteobacteria;Gammaproteobacteria;Enterobacterales;Enterobacteriaceae;Citrobacter;Citrobacter_freundii_complex_sp_CFNIH2	0	0	58	0	0	0	0	9	0	0	0.000110027	0	0	0	0	1.72243e-05
Bacteria;Proteobacteria;Alphaproteobacteria;Rhodospirillales;Rhodospirillales_noname;Enhydrobacter;Enhydrobacter_sp_H5	0	0	0	66	0	0	1	0	0	0	0	0.000125287	0	0	1.81043e-06	0
Bacteria;Actinobacteria;Actinobacteria;Micrococcales;Micrococcaceae;Micrococcus;Micrococcus_terreus	0	0	8	48	0	0	11	0	0	0	1.51761e-05	9.1118e-05	0	0	1.99147e-05	0
Bacteria;Proteobacteria;Gammaproteobacteria;Pseudomonadales;Moraxellaceae;Acinetobacter;Acinetobacter_colistiniresistens	0	66	0	0	0	0	0	0	0	0.000125312	0	0	0	0	0	0
Bacteria;Proteobacteria;Gammaproteobacteria;Pseudomonadales;Pseudomonadaceae;Pseudomonas;Pseudomonas_azotoformans	0	5	0	61	0	0	0	0	0	9.49332e-06	0	0.000115796	0	0	0	0
Bacteria;Proteobacteria;Alphaproteobacteria;Rhizobiales;Beijerinckiaceae;Beijerinckiaceae_noname;Beijerinckiaceae_bacterium	0	37	0	0	35	0	0	0	0	7.02506e-05	0	0	5.37568e-05	0	0	0
Bacteria;Firmicutes;Bacilli;Lactobacillales;Lactobacillaceae;Lactobacillus;Lactobacillus_fermentum	0	61	0	0	0	5	0	0	0	0.000115819	0	0	0	7.36515e-06	0	0
Bacteria;Firmicutes;Bacilli;Lactobacillales;Enterococcaceae;Enterococcus;Enterococcus_ratti	13	41	0	0	0	5	8	0	2.27771e-05	7.78452e-05	0	0	0	7.36515e-06	1.44834e-05	0
Bacteria;Proteobacteria;Epsilonproteobacteria;Campylobacterales;Helicobacteraceae;Helicobacter;Helicobacter_sp_MIT_01-6242	0	0	0	0	0	83	0	0	0	0	0	0	0	0.000122261	0	0
Bacteria;Proteobacteria;Gammaproteobacteria;Enterobacterales;Enterobacteriaceae;Raoultella;Raoultella_sp_BIGb0138	0	62	0	0	0	0	0	2	0	0.000117717	0	0	0	0	0	3.82762e-06
Bacteria;Proteobacteria;Gammaproteobacteria;Enterobacterales;Enterobacteriaceae;Lelliottia;Lelliottia_jeotgali	0	39	0	25	0	0	0	0	0	7.40479e-05	0	4.74573e-05	0	0	0	0
Bacteria;Firmicutes;Bacilli;Lactobacillales;Carnobacteriaceae;Atopostipes;Atopostipes_suicloacalis	0	0	0	64	0	0	0	0	0	0	0	0.000121491	0	0	0	0
Bacteria;Firmicutes;Bacilli;Lactobacillales;Enterococcaceae;Enterococcus;Enterococcus_cecorum	0	0	0	0	67	11	1	0	0	0	0	0	0.000102906	1.62033e-05	1.81043e-06	0
Bacteria;Proteobacteria;Alphaproteobacteria;Rhodobacterales;Rhodobacteraceae;Salipiger;Salipiger_bermudensis	0	33	0	11	0	0	0	19	0	6.26559e-05	0	2.08812e-05	0	0	0	3.63623e-05
Bacteria;Proteobacteria;Gammaproteobacteria;Pseudomonadales;Moraxellaceae;Acinetobacter;Acinetobacter_sp_CIP_102143	0	63	0	0	0	0	0	0	0	0.000119616	0	0	0	0	0	0
Bacteria;Actinobacteria;Actinobacteria;Streptomycetales;Streptomycetaceae;Streptomyces;Streptomyces_sp_93	0	63	0	0	0	0	0	0	0	0.000119616	0	0	0	0	0	0
Bacteria;Proteobacteria;Gammaproteobacteria;Enterobacterales;Erwiniaceae;Erwinia;Erwinia_endophytica	0	0	0	62	0	0	0	1	0	0	0	0.000117694	0	0	0	1.91381e-06
Bacteria;Proteobacteria;Gammaproteobacteria;Pseudomonadales;Moraxellaceae;Acinetobacter;Acinetobacter_gyllenbergii	0	0	1	62	0	0	0	0	0	0	1.89702e-06	0.000117694	0	0	0	0
Bacteria;Proteobacteria;Gammaproteobacteria;Pseudomonadales;Pseudomonadaceae;Pseudomonas;Pseudomonas_sp_CHM02	0	0	0	0	0	0	0	62	0	0	0	0	0	0	0	0.000118656
Bacteria;Firmicutes;Bacilli;Lactobacillales;Enterococcaceae;Vagococcus;Vagococcus_entomophilus	0	0	1	0	76	0	0	0	0	0	1.89702e-06	0	0.000116729	0	0	0
Bacteria;Candidatus_Microgenomates;Candidatus_Microgenomates_noname;Candidatus_Microgenomates_noname;Candidatus_Microgenomates_noname;Candidatus_Microgenomates_noname;Candidatus_Microgenomates_bacterium	0	62	0	0	0	0	0	0	0	0.000117717	0	0	0	0	0	0
Bacteria;Proteobacteria;Gammaproteobacteria;Pseudomonadales;Moraxellaceae;Acinetobacter;Acinetobacter_sp_ANC_4218	0	15	0	47	0	0	0	0	0	2.848e-05	0	8.92197e-05	0	0	0	0
Bacteria;Proteobacteria;Gammaproteobacteria;Pseudomonadales;Moraxellaceae;Acinetobacter;Acinetobacter_sp_neg1	0	0	0	62	0	0	0	0	0	0	0	0.000117694	0	0	0	0
Bacteria;Proteobacteria;Alphaproteobacteria;Rhizobiales;Rhizobiaceae;Agrobacterium;Agrobacterium_genomosp_13	0	21	0	18	0	0	0	22	0	3.9872e-05	0	3.41693e-05	0	0	0	4.21038e-05
Bacteria;Proteobacteria;Gammaproteobacteria;Pseudomonadales;Pseudomonadaceae;Pseudomonas;Pseudomonas_fulva	0	0	52	0	0	0	0	9	0	0	9.8645e-05	0	0	0	0	1.72243e-05
Bacteria;Firmicutes;Bacilli;Lactobacillales;Aerococcaceae;Aerococcus;Aerococcus_sp_HMSC072A12	0	61	0	0	0	0	0	0	0	0.000115819	0	0	0	0	0	0
Bacteria;Spirochaetes;Spirochaetia;Leptospirales;Leptospiraceae;Leptospira;Leptospira_harrisiae	0	0	0	61	0	0	0	0	0	0	0	0.000115796	0	0	0	0
Bacteria;Proteobacteria;Betaproteobacteria;Rhodocyclales;Zoogloeaceae;Thauera;Thauera_aminoaromatica	0	0	0	54	0	0	7	0	0	0	0	0.000102508	0	0	1.2673e-05	0
Bacteria;Proteobacteria;Gammaproteobacteria;Enterobacterales;Enterobacteriaceae;Enterobacter;Enterobacter_cloacae_complex_sp	0	27	13	20	0	0	0	0	0	5.12639e-05	2.46612e-05	3.79659e-05	0	0	0	0
Bacteria;Proteobacteria;Gammaproteobacteria;Enterobacterales;Enterobacteriaceae;Enterobacter;Enterobacter_sp_301B	0	6	0	0	0	0	0	53	0	1.1392e-05	0	0	0	0	0	0.000101432
Bacteria;Proteobacteria;Betaproteobacteria;Burkholderiales;Burkholderiales_noname;Methylibium;Methylibium_sp_T29-B	0	59	0	0	0	0	0	0	0	0.000112021	0	0	0	0	0	0
Bacteria;Proteobacteria;Gammaproteobacteria;Chromatiales;Ectothiorhodospiraceae;Ectothiorhodospira;Ectothiorhodospira_marina	0	0	0	59	0	0	0	0	0	0	0	0.000111999	0	0	0	0
Bacteria;Proteobacteria;Gammaproteobacteria;Enterobacterales;Erwiniaceae;Erwinia;Erwinia_aphidicola	0	0	0	59	0	0	0	0	0	0	0	0.000111999	0	0	0	0
Bacteria;Proteobacteria;Betaproteobacteria;Burkholderiales;Burkholderiaceae;Burkholderia;Burkholderia_cenocepacia	0	7	0	14	19	0	0	22	0	1.32907e-05	0	2.65761e-05	2.91823e-05	0	0	4.21038e-05
Bacteria;Proteobacteria;Gammaproteobacteria;Enterobacterales;Enterobacteriaceae;Klebsiella;Klebsiella_sp_OBRC7	0	0	0	0	0	0	0	58	0	0	0	0	0	0	0	0.000111001
Bacteria;Proteobacteria;Gammaproteobacteria;Enterobacterales;Yersiniaceae;Serratia;Serratia_symbiotica	0	8	0	0	0	0	0	50	0	1.51893e-05	0	0	0	0	0	9.56904e-05
Bacteria;Proteobacteria;Gammaproteobacteria;Methylococcales;Methylococcaceae;Methylomonas;Methylomonas_sp_DH-1	0	0	0	58	0	0	0	0	0	0	0	0.000110101	0	0	0	0
Bacteria;Proteobacteria;Gammaproteobacteria;Pseudomonadales;Pseudomonadaceae;Pseudomonas;Pseudomonas_avellanae	0	14	0	42	0	0	2	0	0	2.65813e-05	0	7.97283e-05	0	0	3.62086e-06	0
Bacteria;Proteobacteria;Gammaproteobacteria;Enterobacterales;Enterobacteriaceae;Citrobacter;Citrobacter_sp_MGH100	0	0	0	0	43	0	0	22	0	0	0	0	6.60441e-05	0	0	4.21038e-05
Bacteria;Actinobacteria;Actinobacteria;Corynebacteriales;Mycobacteriaceae;Mycobacterium;Mycobacterium_avium	59	2	0	0	0	0	0	0	0.000103373	3.79733e-06	0	0	0	0	0	0
Bacteria;Proteobacteria;Gammaproteobacteria;Enterobacterales;Yersiniaceae;Yersinia;Yersinia_bercovieri	0	34	0	22	0	0	0	0	0	6.45546e-05	0	4.17624e-05	0	0	0	0
Bacteria;Proteobacteria;Gammaproteobacteria;Enterobacterales;Yersiniaceae;Serratia;Serratia_sp_Leaf51	0	0	0	0	53	0	0	13	0	0	0	0	8.14032e-05	0	0	2.48795e-05
Bacteria;Actinobacteria;Actinobacteria;Micrococcales;Micrococcaceae;Kocuria;Kocuria_sp_442	0	0	0	52	0	0	4	0	0	0	0	9.87112e-05	0	0	7.24172e-06	0
Bacteria;Firmicutes;Bacilli;Lactobacillales;Lactobacillaceae;Lactobacillus;Lactobacillus_tucceti	0	0	0	0	0	0	0	55	0	0	0	0	0	0	0	0.000105259
Bacteria;Proteobacteria;Gammaproteobacteria;Enterobacterales;Pectobacteriaceae;Lonsdalea;Lonsdalea_populi	0	0	0	0	0	0	58	0	0	0	0	0	0	0	0.000105005	0
Bacteria;Cyanobacteria;Cyanobacteria_noname;Nostocales;Nostocaceae;Nostoc;Nostoc_sp_HK-01	0	0	0	0	68	0	0	0	0	0	0	0	0.000104442	0	0	0
Bacteria;Bacteria_noname;Bacteria_noname;Bacteria_noname;Bacteria_noname;Bacteria_noname;bacterium_HR23	0	44	11	0	0	0	0	0	0	8.35412e-05	2.08672e-05	0	0	0	0	0
Bacteria;Firmicutes;Bacilli;Bacillales;Staphylococcaceae;Staphylococcus;Staphylococcus_epidermidis	0	0	0	55	0	0	0	0	0	0	0	0.000104406	0	0	0	0
Bacteria;Proteobacteria;Alphaproteobacteria;Rhodospirillales;Acetobacteraceae;Komagataeibacter;Komagataeibacter_europaeus	0	0	16	38	1	0	0	0	0	0	3.03523e-05	7.21351e-05	1.53591e-06	0	0	0
Bacteria;Proteobacteria;Gammaproteobacteria;Vibrionales;Vibrionaceae;Vibrio;Vibrio_mediterranei	0	0	0	54	0	0	0	0	0	0	0	0.000102508	0	0	0	0
Bacteria;Proteobacteria;Gammaproteobacteria;Enterobacterales;Yersiniaceae;Rahnella;Rahnella_sp_NRRL_B-41462	0	44	0	5	0	0	0	4	0	8.35412e-05	0	9.49146e-06	0	0	0	7.65523e-06
Bacteria;Proteobacteria;Betaproteobacteria;Neisseriales;Chromobacteriaceae;Chromobacterium;Chromobacterium_violaceum	0	19	0	34	0	0	0	0	0	3.60746e-05	0	6.45419e-05	0	0	0	0
Bacteria;Proteobacteria;Gammaproteobacteria;Pseudomonadales;Moraxellaceae;Acinetobacter;Acinetobacter_sp_2JN-4	0	0	0	53	0	0	0	0	0	0	0	0.00010061	0	0	0	0
Bacteria;Proteobacteria;Gammaproteobacteria;Enterobacterales;Erwiniaceae;Erwiniaceae_noname;Erwiniaceae_bacterium_IIIF1SW-P2	0	0	0	53	0	0	0	0	0	0	0	0.00010061	0	0	0	0
Bacteria;Proteobacteria;Gammaproteobacteria;Enterobacterales;Enterobacteriaceae;Enterobacteriaceae_noname;Enterobacteriaceae_bacterium_LSJC7	0	0	18	35	0	0	0	0	0	0	3.41463e-05	6.64402e-05	0	0	0	0
Bacteria;Proteobacteria;Gammaproteobacteria;Pseudomonadales;Pseudomonadaceae;Pseudomonas;Pseudomonas_delhiensis	0	0	9	41	0	0	3	0	0	0	1.70732e-05	7.783e-05	0	0	5.43129e-06	0
Bacteria;Proteobacteria;Epsilonproteobacteria;Campylobacterales;Helicobacteraceae;Helicobacter;Helicobacter_aurati	0	0	0	0	65	0	0	0	0	0	0	0	9.98341e-05	0	0	0
Bacteria;Proteobacteria;Gammaproteobacteria;Pasteurellales;Pasteurellaceae;Gallibacterium;Gallibacterium_salpingitidis	0	0	0	50	0	0	0	2	0	0	0	9.49146e-05	0	0	0	3.82762e-06
Bacteria;Proteobacteria;Betaproteobacteria;Burkholderiales;Alcaligenaceae;Achromobacter;Achromobacter_marplatensis	0	52	0	0	0	0	0	0	0	9.87306e-05	0	0	0	0	0	0
Bacteria;Acidobacteria;Acidobacteria_noname;Acidobacteria_noname;Acidobacteria_noname;Acidobacteria_noname;Acidobacteria_bacterium_ADurbBin340	0	36	0	16	0	0	0	0	0	6.83519e-05	0	3.03727e-05	0	0	0	0
Bacteria;Proteobacteria;Gammaproteobacteria;Vibrionales;Vibrionaceae;Photobacterium;Photobacterium_gaetbulicola	0	0	12	40	0	0	0	0	0	0	2.27642e-05	7.59317e-05	0	0	0	0
Bacteria;Proteobacteria;Alphaproteobacteria;Rhodospirillales;Rhodospirillaceae;Azospirillum;Azospirillum_brasilense	0	0	14	38	0	0	0	0	0	0	2.65583e-05	7.21351e-05	0	0	0	0
Bacteria;Firmicutes;Bacilli;Bacillales;Listeriaceae;Listeria;Listeria_monocytogenes	0	0	0	8	32	23	0	0	0	0	0	1.51863e-05	4.91491e-05	3.38797e-05	0	0
Bacteria;Proteobacteria;Gammaproteobacteria;Enterobacterales;Enterobacteriaceae;Escherichia;Escherichia_sp_MOD1-EC5189	0	0	33	0	0	0	0	18	0	0	6.26016e-05	0	0	0	0	3.44485e-05
Bacteria;Proteobacteria;Gammaproteobacteria;Pseudomonadales;Pseudomonadaceae;Pseudomonas;Pseudomonas_plecoglossicida	0	0	41	0	0	0	0	10	0	0	7.77778e-05	0	0	0	0	1.91381e-05
Bacteria;Proteobacteria;Gammaproteobacteria;Pseudomonadales;Moraxellaceae;Acinetobacter;Acinetobacter_sp_ANC_5600	0	51	0	0	0	0	0	0	0	9.68319e-05	0	0	0	0	0	0
Bacteria;Proteobacteria;Gammaproteobacteria;Enterobacterales;Yersiniaceae;Rahnella;Rahnella_woolbedingensis	0	51	0	0	0	0	0	0	0	9.68319e-05	0	0	0	0	0	0
Bacteria;Proteobacteria;Gammaproteobacteria;Pseudomonadales;Pseudomonadaceae;Pseudomonas;Pseudomonas_deceptionensis	0	13	0	38	0	0	0	0	0	2.46826e-05	0	7.21351e-05	0	0	0	0
Bacteria;Actinobacteria;Actinobacteria;Micrococcales;Dermabacteraceae;Brachybacterium;Brachybacterium_endophyticum	0	0	0	51	0	0	0	0	0	0	0	9.68129e-05	0	0	0	0
Bacteria;Proteobacteria;Gammaproteobacteria;Enterobacterales;Enterobacteriaceae;Citrobacter;Citrobacter_sp_BIDMC107	0	0	0	0	0	0	0	50	0	0	0	0	0	0	0	9.56904e-05
Bacteria;Proteobacteria;Gammaproteobacteria;Aeromonadales;Aeromonadaceae;Aeromonas;Aeromonas_sp_62-46	0	0	37	2	0	0	0	11	0	0	7.01897e-05	3.79659e-06	0	0	0	2.10519e-05
Bacteria;Firmicutes;Bacilli;Lactobacillales;Carnobacteriaceae;Alkalibacterium;Alkalibacterium_subtropicum	0	50	0	0	0	0	0	0	0	9.49332e-05	0	0	0	0	0	0
Bacteria;Proteobacteria;Betaproteobacteria;Neisseriales;Neisseriaceae;Neisseria;Neisseria_gonorrhoeae	0	50	0	0	0	0	0	0	0	9.49332e-05	0	0	0	0	0	0
Bacteria;Proteobacteria;Gammaproteobacteria;Pseudomonadales;Moraxellaceae;Acinetobacter;Acinetobacter_sp_NIPH_713	0	9	0	41	0	0	0	0	0	1.7088e-05	0	7.783e-05	0	0	0	0
Bacteria;Proteobacteria;Gammaproteobacteria;Pseudomonadales;Moraxellaceae;Acinetobacter;Acinetobacter_sp_WCHAc060096	0	0	0	50	0	0	0	0	0	0	0	9.49146e-05	0	0	0	0
Bacteria;Balneolaeota;Balneolia;Balneolales;Balneolaceae;Aliifodinibius;Aliifodinibius_halophilus	0	0	0	50	0	0	0	0	0	0	0	9.49146e-05	0	0	0	0
Bacteria;Proteobacteria;Gammaproteobacteria;Enterobacterales;Yersiniaceae;Serratia;Serratia_ficaria	0	49	0	0	0	0	0	0	0	9.30346e-05	0	0	0	0	0	0
Bacteria;Proteobacteria;Gammaproteobacteria;Pseudomonadales;Moraxellaceae;Acinetobacter;Acinetobacter_sp_SWAC5	0	0	0	49	0	0	0	0	0	0	0	9.30163e-05	0	0	0	0
Bacteria;Proteobacteria;Gammaproteobacteria;Enterobacterales;Enterobacteriaceae;Escherichia;Escherichia_sp_E2748	0	0	0	0	60	0	0	0	0	0	0	0	9.21546e-05	0	0	0
Bacteria;Proteobacteria;Betaproteobacteria;Burkholderiales;Comamonadaceae;Alicycliphilus;Alicycliphilus_sp_B1	0	24	0	24	0	0	0	0	0	4.55679e-05	0	4.5559e-05	0	0	0	0
Bacteria;Proteobacteria;Alphaproteobacteria;Rhizobiales;Rhodobiaceae;Rhodobiaceae_noname;Rhodobiaceae_bacterium	0	0	48	0	0	0	0	0	0	0	9.10569e-05	0	0	0	0	0
Bacteria;Firmicutes;Clostridia;Clostridiales;Clostridiaceae;Clostridium;Clostridium_paraputrificum	2	46	0	0	0	0	0	0	3.50416e-06	8.73386e-05	0	0	0	0	0	0
Bacteria;Actinobacteria;Actinobacteria;Micrococcales;Micrococcaceae;Kocuria;Kocuria_sp_JC486	0	0	0	36	0	0	12	0	0	0	0	6.83385e-05	0	0	2.17252e-05	0
Bacteria;Proteobacteria;Gammaproteobacteria;Enterobacterales;Hafniaceae;Edwardsiella;Edwardsiella_piscicida	0	0	40	0	0	0	0	7	0	0	7.58807e-05	0	0	0	0	1.33967e-05
Bacteria;Proteobacteria;Gammaproteobacteria;Enterobacterales;Enterobacteriaceae;Citrobacter;Citrobacter_sp_AATXR	0	0	41	0	0	0	0	6	0	0	7.77778e-05	0	0	0	0	1.14828e-05
Bacteria;Proteobacteria;Gammaproteobacteria;Pseudomonadales;Moraxellaceae;Acinetobacter;Acinetobacter_sp_CIP-A165	0	0	0	47	0	0	0	0	0	0	0	8.92197e-05	0	0	0	0
Bacteria;Proteobacteria;Gammaproteobacteria;Pseudomonadales;Moraxellaceae;Acinetobacter;Acinetobacter_sp_SM1B	0	0	0	47	0	0	0	0	0	0	0	8.92197e-05	0	0	0	0
Bacteria;Actinobacteria;Actinobacteria;Micrococcales;Cellulomonadaceae;Cellulomonas;Cellulomonas_oligotrophica	19	0	0	0	36	0	0	0	3.32895e-05	0	0	0	5.52927e-05	0	0	0
Bacteria;Proteobacteria;Gammaproteobacteria;Enterobacterales;Enterobacteriaceae;Escherichia;Escherichia_sp_MOD1-EC5287	0	0	0	5	0	0	36	7	0	0	0	9.49146e-06	0	0	6.51755e-05	1.33967e-05
Bacteria;Firmicutes;Bacilli;Lactobacillales;Lactobacillaceae;Lactobacillus;Lactobacillus_sp_256-3	0	0	0	0	0	0	0	46	0	0	0	0	0	0	0	8.80352e-05
Bacteria;Proteobacteria;Gammaproteobacteria;Enterobacterales;Yersiniaceae;Yersinia;Yersinia_pseudotuberculosis	0	0	25	0	0	0	0	21	0	0	4.74255e-05	0	0	0	0	4.019e-05
Bacteria;Proteobacteria;Gammaproteobacteria;Pseudomonadales;Pseudomonadaceae;Pseudomonas;Pseudomonas_sp_LAB-08	0	0	31	0	0	0	0	15	0	0	5.88076e-05	0	0	0	0	2.87071e-05
Bacteria;Chloroflexi;Anaerolineae;Anaerolineales;Anaerolineaceae;Levilinea;Levilinea_saccharolytica	0	0	0	46	0	0	0	0	0	0	0	8.73215e-05	0	0	0	0
Bacteria;Firmicutes;Clostridia;Clostridiales;Ruminococcaceae;Ruminococcus;Ruminococcus_sp_OM04-4AA	0	0	0	46	0	0	0	0	0	0	0	8.73215e-05	0	0	0	0
Bacteria;Firmicutes;Bacilli;Lactobacillales;Lactobacillaceae;Lactobacillus;Lactobacillus_allii	0	0	0	0	0	0	0	45	0	0	0	0	0	0	0	8.61213e-05
Bacteria;Proteobacteria;Gammaproteobacteria;Enterobacterales;Yersiniaceae;Rahnella;Rahnella_sp_BIGb0236	0	45	0	0	0	0	0	0	0	8.54399e-05	0	0	0	0	0	0
Bacteria;Firmicutes;Bacilli;Lactobacillales;Carnobacteriaceae;Isobaculum;Isobaculum_melis	0	0	0	45	0	0	0	0	0	0	0	8.54232e-05	0	0	0	0
Bacteria;Firmicutes;Bacilli;Lactobacillales;Lactobacillaceae;Lactobacillus;Lactobacillus_sanfranciscensis	6	0	0	18	7	20	0	0	1.05125e-05	0	0	3.41693e-05	1.07514e-05	2.94606e-05	0	0
Bacteria;Firmicutes;Bacilli;Lactobacillales;Lactobacillaceae;Lactobacillus;Lactobacillus_shenzhenensis	48	0	0	0	0	0	0	0	8.40999e-05	0	0	0	0	0	0	0
Bacteria;Proteobacteria;Betaproteobacteria;Burkholderiales;Alcaligenaceae;Achromobacter;Achromobacter_insolitus	0	0	25	6	0	0	0	13	0	0	4.74255e-05	1.13898e-05	0	0	0	2.48795e-05
Bacteria;Proteobacteria;Gammaproteobacteria;Enterobacterales;Pectobacteriaceae;Dickeya;Dickeya_chrysanthemi	0	0	0	2	52	0	0	0	0	0	0	3.79659e-06	7.98673e-05	0	0	0
Bacteria;Proteobacteria;Betaproteobacteria;Burkholderiales;Alcaligenaceae;Achromobacter;Achromobacter_ruhlandii	0	44	0	0	0	0	0	0	0	8.35412e-05	0	0	0	0	0	0
Bacteria;Proteobacteria;Gammaproteobacteria;Pseudomonadales;Moraxellaceae;Acinetobacter;Acinetobacter_sp_UNC436CL71CviS28	0	44	0	0	0	0	0	0	0	8.35412e-05	0	0	0	0	0	0
Bacteria;Proteobacteria;Gammaproteobacteria;Pseudomonadales;Moraxellaceae;Acinetobacter;Acinetobacter_piscicola	0	11	0	33	0	0	0	0	0	2.08853e-05	0	6.26437e-05	0	0	0	0
Bacteria;Firmicutes;Bacilli;Bacillales;Planococcaceae;Jeotgalibacillus;Jeotgalibacillus_soli	0	0	0	44	0	0	0	0	0	0	0	8.35249e-05	0	0	0	0
Bacteria;Proteobacteria;Gammaproteobacteria;Pseudomonadales;Moraxellaceae;Acinetobacter;Acinetobacter_sp_ANC_5347	0	0	0	0	0	0	46	0	0	0	0	0	0	0	8.32798e-05	0
Bacteria;Proteobacteria;Gammaproteobacteria;Pseudomonadales;Pseudomonadaceae;Pseudomonas;Pseudomonas_reidholzensis	0	0	0	40	0	0	4	0	0	0	0	7.59317e-05	0	0	7.24172e-06	0
Bacteria;Actinobacteria;Actinobacteria;Micrococcales;Microbacteriaceae;Curtobacterium;Curtobacterium_sp_S6	0	0	0	30	0	0	14	0	0	0	0	5.69488e-05	0	0	2.5346e-05	0
Bacteria;Proteobacteria;Gammaproteobacteria;Aeromonadales;Aeromonadaceae;Aeromonas;Aeromonas_schubertii	0	43	0	0	0	0	0	0	0	8.16426e-05	0	0	0	0	0	0
Bacteria;Proteobacteria;Gammaproteobacteria;Enterobacterales;Enterobacteriaceae;Enterobacteriaceae_noname;Type-E_symbiont_of_Plautia_stali	0	34	0	9	0	0	0	0	0	6.45546e-05	0	1.70846e-05	0	0	0	0
Bacteria;Proteobacteria;Epsilonproteobacteria;Campylobacterales;Helicobacteraceae;Helicobacter;Helicobacter_sp_MIT_05-5294	0	0	0	0	53	0	0	0	0	0	0	0	8.14032e-05	0	0	0
Bacteria;Proteobacteria;Gammaproteobacteria;Enterobacterales;Yersiniaceae;Chania;Chania_multitudinisentens	0	10	0	0	40	0	0	0	0	1.89866e-05	0	0	6.14364e-05	0	0	0
Bacteria;Firmicutes;Bacilli;Lactobacillales;Lactobacillaceae;Lactobacillus;Lactobacillus_mudanjiangensis	0	34	0	0	10	0	0	0	0	6.45546e-05	0	0	1.53591e-05	0	0	0
Bacteria;Proteobacteria;Alphaproteobacteria;Rhodobacterales;Rhodobacteraceae;Maritimibacter;Maritimibacter_alkaliphilus	0	0	0	35	0	0	0	7	0	0	0	6.64402e-05	0	0	0	1.33967e-05
Bacteria;Proteobacteria;Gammaproteobacteria;Enterobacterales;Enterobacteriaceae;Enterobacter;Enterobacter_sp_BIDMC_26	0	42	0	0	0	0	0	0	0	7.97439e-05	0	0	0	0	0	0
Bacteria;Proteobacteria;Gammaproteobacteria;Enterobacterales;Morganellaceae;Photorhabdus;Photorhabdus_khanii	0	0	0	42	0	0	0	0	0	0	0	7.97283e-05	0	0	0	0
Bacteria;Proteobacteria;Gammaproteobacteria;Pseudomonadales;Pseudomonadaceae;Pseudomonas;Pseudomonas_sp_H9	0	0	42	0	0	0	0	0	0	0	7.96748e-05	0	0	0	0	0
Bacteria;Proteobacteria;Alphaproteobacteria;Rhizobiales;Methylocystaceae;Methylocystaceae_noname;Methylocystaceae_bacterium	0	0	0	41	0	0	1	0	0	0	0	7.783e-05	0	0	1.81043e-06	0
Bacteria;Proteobacteria;Gammaproteobacteria;Enterobacterales;Yersiniaceae;Rahnella;Rahnella_victoriana	0	41	0	0	0	0	0	0	0	7.78452e-05	0	0	0	0	0	0
Bacteria;Proteobacteria;Gammaproteobacteria;Pseudomonadales;Moraxellaceae;Acinetobacter;Acinetobacter_sp_SWAC57	0	29	0	12	0	0	0	0	0	5.50613e-05	0	2.27795e-05	0	0	0	0
Bacteria;Proteobacteria;Gammaproteobacteria;Pseudomonadales;Moraxellaceae;Acinetobacter;Acinetobacter_sp_1294596	0	0	0	41	0	0	0	0	0	0	0	7.783e-05	0	0	0	0
Bacteria;Proteobacteria;Gammaproteobacteria;Pseudomonadales;Moraxellaceae;Acinetobacter;Acinetobacter_sp_NIPH_284	0	0	0	41	0	0	0	0	0	0	0	7.783e-05	0	0	0	0
Bacteria;Bacteroidetes;Bacteroidia;Bacteroidales;Muribaculaceae;Muribaculaceae_noname;Muribaculaceae_bacterium	0	0	0	41	0	0	0	0	0	0	0	7.783e-05	0	0	0	0
Bacteria;Proteobacteria;Gammaproteobacteria;Enterobacterales;Erwiniaceae;Pantoea;Pantoea_sp_9140	0	0	0	41	0	0	0	0	0	0	0	7.783e-05	0	0	0	0
Bacteria;Proteobacteria;Gammaproteobacteria;Pseudomonadales;Moraxellaceae;Psychrobacter;Psychrobacter_sp_TB47	0	0	0	40	0	0	1	0	0	0	0	7.59317e-05	0	0	1.81043e-06	0
Bacteria;Proteobacteria;Alphaproteobacteria;Rickettsiales;Rickettsiales_noname;Rickettsiales_noname;Rickettsiales_bacterium	0	0	0	40	0	0	1	0	0	0	0	7.59317e-05	0	0	1.81043e-06	0
Bacteria;Firmicutes;Bacilli;Bacillales;Bacillaceae;Bacillus;Bacillus_thuringiensis	0	0	0	0	0	52	0	0	0	0	0	0	0	7.65976e-05	0	0
Bacteria;Actinobacteria;Actinobacteria;Corynebacteriales;Mycobacteriaceae;Mycolicibacterium;Mycolicibacterium_malmesburyense	0	0	14	21	0	0	0	5	0	0	2.65583e-05	3.98641e-05	0	0	0	9.56904e-06
Bacteria;Proteobacteria;Gammaproteobacteria;Pseudomonadales;Moraxellaceae;Acinetobacter;Acinetobacter_venetianus	0	0	0	20	0	0	21	0	0	0	0	3.79659e-05	0	0	3.8019e-05	0
Bacteria;Proteobacteria;Gammaproteobacteria;Thiotrichales;Thiotrichaceae;Leucothrix;Leucothrix_sp_C3212	0	0	0	40	0	0	0	0	0	0	0	7.59317e-05	0	0	0	0
Bacteria;Proteobacteria;Gammaproteobacteria;Enterobacterales;Erwiniaceae;Pantoea;Pantoea_sp_PNA_14-12	0	0	0	40	0	0	0	0	0	0	0	7.59317e-05	0	0	0	0
Bacteria;Proteobacteria;Betaproteobacteria;Burkholderiales;Burkholderiales_noname;Paucibacter;Paucibacter_sp_KBW04	0	0	0	40	0	0	0	0	0	0	0	7.59317e-05	0	0	0	0
Bacteria;Firmicutes;Bacilli;Bacillales;Bacillaceae;Salimicrobium;Salimicrobium_jeotgali	0	0	0	40	0	0	0	0	0	0	0	7.59317e-05	0	0	0	0
Bacteria;Proteobacteria;Betaproteobacteria;Burkholderiales;Burkholderiaceae;Caballeronia;Caballeronia_choica	0	29	0	0	0	0	0	10	0	5.50613e-05	0	0	0	0	0	1.91381e-05
Bacteria;Proteobacteria;Gammaproteobacteria;Enterobacterales;Erwiniaceae;Erwinia;Erwinia_toletana	0	0	0	39	0	0	0	0	0	0	0	7.40334e-05	0	0	0	0
Bacteria;Bacteroidetes;Cytophagia;Cytophagales;Hymenobacteraceae;Hymenobacter;Hymenobacter_lapidarius	0	0	0	39	0	0	0	0	0	0	0	7.40334e-05	0	0	0	0
Bacteria;Proteobacteria;Betaproteobacteria;Neisseriales;Neisseriaceae;Neisseria;Neisseria_zalophi	0	0	0	39	0	0	0	0	0	0	0	7.40334e-05	0	0	0	0
Bacteria;Proteobacteria;Gammaproteobacteria;Aeromonadales;Aeromonadaceae;Aeromonas;Aeromonas_sobria	0	8	31	0	0	0	0	0	0	1.51893e-05	5.88076e-05	0	0	0	0	0
Bacteria;Proteobacteria;Gammaproteobacteria;Vibrionales;Vibrionaceae;Vibrio;Vibrio_ponticus	0	0	0	36	0	0	3	0	0	0	0	6.83385e-05	0	0	5.43129e-06	0
Bacteria;Firmicutes;Bacilli;Bacillales;Listeriaceae;Listeria;Listeria_costaricensis	0	0	0	0	48	0	0	0	0	0	0	0	7.37237e-05	0	0	0
Bacteria;Proteobacteria;Gammaproteobacteria;Pseudomonadales;Moraxellaceae;Moraxella;Moraxella_boevrei	0	0	0	30	0	0	9	0	0	0	0	5.69488e-05	0	0	1.62939e-05	0
Bacteria;Proteobacteria;Gammaproteobacteria;Enterobacterales;Enterobacteriaceae;Enterobacteriaceae_noname;Enterobacteriaceae_bacterium_ATCC_29904	0	0	0	0	0	0	40	0	0	0	0	0	0	0	7.24172e-05	0
Bacteria;Proteobacteria;Gammaproteobacteria;Pseudomonadales;Moraxellaceae;Acinetobacter;Acinetobacter_boissieri	0	0	0	38	0	0	0	0	0	0	0	7.21351e-05	0	0	0	0
Bacteria;Proteobacteria;Gammaproteobacteria;Pasteurellales;Pasteurellaceae;Pasteurella;Pasteurella_skyensis	0	0	0	36	0	0	2	0	0	0	0	6.83385e-05	0	0	3.62086e-06	0
Bacteria;Verrucomicrobia;Verrucomicrobia_noname;Verrucomicrobia_noname;Verrucomicrobia_noname;Verrucomicrobia_noname;Verrucomicrobia_bacterium_ADurbBin345	0	0	0	28	12	0	0	0	0	0	0	5.31522e-05	1.84309e-05	0	0	0
Bacteria;Cyanobacteria;Cyanobacteria_noname;Nostocales;Nostocaceae;Nostoc;Nostoc_sphaeroides	0	0	0	0	46	0	0	0	0	0	0	0	7.06518e-05	0	0	0
Bacteria;Proteobacteria;Betaproteobacteria;Betaproteobacteria_noname;Betaproteobacteria_noname;Candidatus_Accumulibacter;Candidatus_Accumulibacter_sp_BA-91	0	22	0	15	0	0	0	0	0	4.17706e-05	0	2.84744e-05	0	0	0	0
Bacteria;Proteobacteria;Gammaproteobacteria;Pseudomonadales;Pseudomonadaceae;Pseudomonas;Pseudomonas_sp_10-1B	0	0	0	37	0	0	0	0	0	0	0	7.02368e-05	0	0	0	0
Bacteria;Proteobacteria;Gammaproteobacteria;Pasteurellales;Pasteurellaceae;Volucribacter;Volucribacter_psittacicida	0	0	0	37	0	0	0	0	0	0	0	7.02368e-05	0	0	0	0
Bacteria;Proteobacteria;Alphaproteobacteria;Rhizobiales;Rhizobiaceae;Sinorhizobium;Sinorhizobium_sp_LM21	0	0	37	0	0	0	0	0	0	0	7.01897e-05	0	0	0	0	0
Bacteria;Fusobacteria;Fusobacteriia;Fusobacteriales;Leptotrichiaceae;Leptotrichia;Leptotrichia_wadei	40	0	0	0	0	0	0	0	7.00833e-05	0	0	0	0	0	0	0
Bacteria;Proteobacteria;Gammaproteobacteria;Enterobacterales;Enterobacteriaceae;Klebsiella;Klebsiella_sp_889	0	0	0	0	0	0	0	36	0	0	0	0	0	0	0	6.88971e-05
Bacteria;Firmicutes;Bacilli;Lactobacillales;Lactobacillaceae;Lactobacillus;Lactobacillus_algidus	0	0	0	0	0	0	0	36	0	0	0	0	0	0	0	6.88971e-05
Bacteria;Proteobacteria;Gammaproteobacteria;Alteromonadales;Pseudoalteromonadaceae;Pseudoalteromonas;Pseudoalteromonas_sp_643A	0	0	0	19	0	0	18	0	0	0	0	3.60676e-05	0	0	3.25877e-05	0
Bacteria;Proteobacteria;Gammaproteobacteria;Aeromonadales;Aeromonadaceae;Aeromonas;Aeromonas_sp_159	0	36	0	0	0	0	0	0	0	6.83519e-05	0	0	0	0	0	0
Bacteria;Proteobacteria;Betaproteobacteria;Burkholderiales;Burkholderiales_noname;Aquabacterium;Aquabacterium_sp	0	36	0	0	0	0	0	0	0	6.83519e-05	0	0	0	0	0	0
Bacteria;Firmicutes;Clostridia;Clostridiales;Lachnospiraceae;Anaerocolumna;Anaerocolumna_aminovalerica	0	0	0	36	0	0	0	0	0	0	0	6.83385e-05	0	0	0	0
Bacteria;Firmicutes;Clostridia;Clostridiales;Peptococcaceae;Pelotomaculum;Pelotomaculum_sp_FP	0	0	0	36	0	0	0	0	0	0	0	6.83385e-05	0	0	0	0
Bacteria;Proteobacteria;Gammaproteobacteria;Xanthomonadales;Rhodanobacteraceae;Rhodanobacter;Rhodanobacter_lindaniclasticus	0	0	0	36	0	0	0	0	0	0	0	6.83385e-05	0	0	0	0
Bacteria;Proteobacteria;Gammaproteobacteria;Enterobacterales;Erwiniaceae;Pantoea;Pantoea_sp_AS-PWVM4	0	0	0	24	0	0	2	10	0	0	0	4.5559e-05	0	0	3.62086e-06	1.91381e-05
Bacteria;Proteobacteria;Gammaproteobacteria;Pseudomonadales;Moraxellaceae;Acinetobacter;Acinetobacter_sp_Ac_877	0	22	0	0	0	0	14	0	0	4.17706e-05	0	0	0	0	2.5346e-05	0
Bacteria;Firmicutes;Bacilli;Lactobacillales;Lactobacillaceae;Lactobacillus;Lactobacillus_acidipiscis	0	0	0	0	0	0	0	35	0	0	0	0	0	0	0	6.69833e-05
Bacteria;Cyanobacteria;Cyanobacteria_noname;Synechococcales;Leptolyngbyaceae;Leptolyngbya;Leptolyngbya_boryana	0	0	0	0	0	0	0	35	0	0	0	0	0	0	0	6.69833e-05
Bacteria;Actinobacteria;Actinobacteria;Streptomycetales;Streptomycetaceae;Streptomyces;Streptomyces_sp_WAC00263	0	35	0	0	0	0	0	0	0	6.64533e-05	0	0	0	0	0	0
Bacteria;Proteobacteria;Gammaproteobacteria;Pseudomonadales;Moraxellaceae;Acinetobacter;Acinetobacter_sp_NIPH_2100	0	0	0	35	0	0	0	0	0	0	0	6.64402e-05	0	0	0	0
Bacteria;Proteobacteria;Gammaproteobacteria;Alteromonadales;Alteromonadaceae;Marinobacter;Marinobacter_sp_P4B1	0	0	0	35	0	0	0	0	0	0	0	6.64402e-05	0	0	0	0
Bacteria;Proteobacteria;Gammaproteobacteria;Pseudomonadales;Pseudomonadaceae;Pseudomonas;Pseudomonas_sp_URHB0015	0	0	0	35	0	0	0	0	0	0	0	6.64402e-05	0	0	0	0
Bacteria;Firmicutes;Bacilli;Bacillales;Bacillaceae;Virgibacillus;Virgibacillus_halodenitrificans	2	33	0	0	0	0	0	0	3.50416e-06	6.26559e-05	0	0	0	0	0	0
Bacteria;Actinobacteria;Actinobacteria;Streptomycetales;Streptomycetaceae;Streptomyces;Streptomyces_lavendulae	0	0	5	21	0	0	9	0	0	0	9.48509e-06	3.98641e-05	0	0	1.62939e-05	0
Bacteria;Actinobacteria;Actinobacteria;Propionibacteriales;Nocardioidaceae;Nocardioides;Nocardioides_sp_K1W22B-1	0	0	0	24	0	0	11	0	0	0	0	4.5559e-05	0	0	1.99147e-05	0
Bacteria;Proteobacteria;Gammaproteobacteria;Enterobacterales;Enterobacteriaceae;Enterobacter;Enterobacter_sp_ZOR0014	0	0	0	0	0	0	36	0	0	0	0	0	0	0	6.51755e-05	0
Bacteria;Firmicutes;Bacilli;Lactobacillales;Lactobacillaceae;Lactobacillus;Lactobacillus_malefermentans	0	0	0	0	0	0	0	34	0	0	0	0	0	0	0	6.50695e-05
Bacteria;Proteobacteria;Gammaproteobacteria;Pseudomonadales;Pseudomonadaceae;Pseudomonas;Pseudomonas_sp_G5(2012)	0	8	0	15	0	0	0	11	0	1.51893e-05	0	2.84744e-05	0	0	0	2.10519e-05
Bacteria;Proteobacteria;Gammaproteobacteria;Enterobacterales;Yersiniaceae;Rahnella;Rahnella_sp_AN3-3W3	0	34	0	0	0	0	0	0	0	6.45546e-05	0	0	0	0	0	0
Bacteria;Firmicutes;Bacilli;Bacillales;Bacillaceae;Bacillus;Bacillus_sp_RC	0	0	0	34	0	0	0	0	0	0	0	6.45419e-05	0	0	0	0
Bacteria;Proteobacteria;Alphaproteobacteria;Rhizobiales;Phyllobacteriaceae;Mesorhizobium;Mesorhizobium_sp	0	0	0	25	11	0	0	0	0	0	0	4.74573e-05	1.6895e-05	0	0	0
Bacteria;Proteobacteria;Gammaproteobacteria;Pseudomonadales;Moraxellaceae;Acinetobacter;Acinetobacter_sp_Ac_1271	0	6	0	25	0	0	3	0	0	1.1392e-05	0	4.74573e-05	0	0	5.43129e-06	0
Bacteria;Actinobacteria;Actinobacteria;Propionibacteriales;Nocardioidaceae;Friedmanniella;Friedmanniella_luteola	0	0	0	28	0	0	6	0	0	0	0	5.31522e-05	0	0	1.08626e-05	0
Bacteria;Bacteroidetes;Cytophagia;Cytophagales;Cyclobacteriaceae;Cecembia;Cecembia_calidifontis	4	28	0	0	0	0	0	2	7.00833e-06	5.31626e-05	0	0	0	0	0	3.82762e-06
Bacteria;Proteobacteria;Gammaproteobacteria;Enterobacterales;Yersiniaceae;Serratia;Serratia_sp_BW106	0	0	0	0	0	0	0	33	0	0	0	0	0	0	0	6.31557e-05
Bacteria;Proteobacteria;Gammaproteobacteria;Enterobacterales;Erwiniaceae;Tatumella;Tatumella_morbirosei	0	0	0	0	0	0	0	33	0	0	0	0	0	0	0	6.31557e-05
Bacteria;Candidatus_Omnitrophica;Candidatus_Omnitrophica_noname;Candidatus_Omnitrophica_noname;Candidatus_Omnitrophica_noname;Candidatus_Omnitrophica_noname;Candidatus_Omnitrophica_bacterium_ADurbBin314	0	0	0	0	41	0	0	0	0	0	0	0	6.29723e-05	0	0	0
Bacteria;Proteobacteria;Betaproteobacteria;Betaproteobacteria_noname;Betaproteobacteria_noname;Betaproteobacteria_noname;Betaproteobacteria_bacterium_ADurbBin341	0	33	0	0	0	0	0	0	0	6.26559e-05	0	0	0	0	0	0
Bacteria;Actinobacteria;Actinobacteria;Propionibacteriales;Nocardioidaceae;Aeromicrobium;Aeromicrobium_sp_Root495	0	0	0	33	0	0	0	0	0	0	0	6.26437e-05	0	0	0	0
Bacteria;Planctomycetes;Planctomycetia;Candidatus_Brocadiales;Candidatus_Brocadiaceae;Candidatus_Brocadia;Candidatus_Brocadia_fulgida	0	0	0	33	0	0	0	0	0	0	0	6.26437e-05	0	0	0	0
Bacteria;Proteobacteria;Betaproteobacteria;Neisseriales;Neisseriaceae;Neisseria;Neisseria_shayeganii	0	0	0	33	0	0	0	0	0	0	0	6.26437e-05	0	0	0	0
Bacteria;Actinobacteria;Actinobacteria;Micrococcales;Dermatophilaceae;Austwickia;Austwickia_chelonae	0	0	0	27	0	0	6	0	0	0	0	5.12539e-05	0	0	1.08626e-05	0
Bacteria;Proteobacteria;Alphaproteobacteria;Alphaproteobacteria_noname;Alphaproteobacteria_noname;Alphaproteobacteria_noname;Alphaproteobacteria_bacterium_ADurbBin100	0	14	0	0	0	0	0	18	0	2.65813e-05	0	0	0	0	0	3.44485e-05
Bacteria;Firmicutes;Bacilli;Lactobacillales;Enterococcaceae;Enterococcus;Enterococcus_sp_CU12B	0	28	0	0	5	0	0	0	0	5.31626e-05	0	0	7.67955e-06	0	0	0
Bacteria;Proteobacteria;Gammaproteobacteria;Pseudomonadales;Moraxellaceae;Acinetobacter;Acinetobacter_oleivorans	0	0	0	32	0	0	0	0	0	0	0	6.07454e-05	0	0	0	0
Bacteria;Proteobacteria;Gammaproteobacteria;Pseudomonadales;Moraxellaceae;Acinetobacter;Acinetobacter_sp_YK3	0	0	0	32	0	0	0	0	0	0	0	6.07454e-05	0	0	0	0
Bacteria;Proteobacteria;Alphaproteobacteria;Rhizobiales;Rhizobiaceae;Ensifer;Ensifer_sp_M14	0	0	0	32	0	0	0	0	0	0	0	6.07454e-05	0	0	0	0
Bacteria;Firmicutes;Bacilli;Lactobacillales;Enterococcaceae;Enterococcus;Enterococcus_mundtii	0	0	0	32	0	0	0	0	0	0	0	6.07454e-05	0	0	0	0
Bacteria;Bacteroidetes;Cytophagia;Cytophagales;Hymenobacteraceae;Hymenobacter;Hymenobacter_sp_CCM_8763	0	0	0	32	0	0	0	0	0	0	0	6.07454e-05	0	0	0	0
Bacteria;Firmicutes;Bacilli;Lactobacillales;Lactobacillaceae;Lactobacillus;Lactobacillus_paracollinoides	0	1	0	0	33	2	2	0	0	1.89866e-06	0	0	5.0685e-05	2.94606e-06	3.62086e-06	0
Bacteria;Bacteroidetes;Cytophagia;Cytophagales;Flammeovirgaceae;Cesiribacter;Cesiribacter_andamanensis	0	0	0	31	0	0	0	0	0	0	0	5.88471e-05	0	0	0	0
Bacteria;Actinobacteria;Actinobacteria;Micrococcales;Micrococcaceae;Kocuria;Kocuria_halotolerans	0	0	0	31	0	0	0	0	0	0	0	5.88471e-05	0	0	0	0
Bacteria;Proteobacteria;Gammaproteobacteria;Pseudomonadales;Pseudomonadaceae;Pseudomonas;Pseudomonas_sp_SHC52	0	0	0	31	0	0	0	0	0	0	0	5.88471e-05	0	0	0	0
Bacteria;Proteobacteria;Betaproteobacteria;Burkholderiales;Burkholderiaceae;Burkholderia;Burkholderia_pyrrocinia	0	0	0	0	0	0	0	30	0	0	0	0	0	0	0	5.74142e-05
Bacteria;Proteobacteria;Gammaproteobacteria;Pseudomonadales;Moraxellaceae;Acinetobacter;Acinetobacter_sp_ANC_3789	0	30	0	0	0	0	0	0	0	5.69599e-05	0	0	0	0	0	0
Bacteria;Proteobacteria;Gammaproteobacteria;Pseudomonadales;Moraxellaceae;Acinetobacter;Acinetobacter_sp_ANC_3929	0	30	0	0	0	0	0	0	0	5.69599e-05	0	0	0	0	0	0
Bacteria;Bacteroidetes;Cytophagia;Cytophagales;Hymenobacteraceae;Hymenobacter;Hymenobacter_roseosalivarius	0	0	0	30	0	0	0	0	0	0	0	5.69488e-05	0	0	0	0
Bacteria;Proteobacteria;Alphaproteobacteria;Sphingomonadales;Sphingomonadaceae;Novosphingobium;Novosphingobium_sp_KN652	0	0	0	30	0	0	0	0	0	0	0	5.69488e-05	0	0	0	0
Bacteria;Bacteroidetes;Bacteroidetes_noname;Bacteroidetes_noname;Bacteroidetes_noname;Bacteroidetes_noname;Bacteroidetes_bacterium	0	0	1	29	0	0	0	0	0	0	1.89702e-06	5.50505e-05	0	0	0	0
Bacteria;Proteobacteria;Gammaproteobacteria;Vibrionales;Vibrionaceae;Vibrio;Vibrio_navarrensis	0	0	0	0	0	0	24	7	0	0	0	0	0	0	4.34503e-05	1.33967e-05
Bacteria;Proteobacteria;Gammaproteobacteria;Enterobacterales;Enterobacteriaceae;Escherichia;Escherichia_sp_MOD1-EC5451	0	0	0	20	0	0	10	0	0	0	0	3.79659e-05	0	0	1.81043e-05	0
Bacteria;Firmicutes;Bacilli;Lactobacillales;Leuconostocaceae;Weissella;Weissella_paramesenteroides	0	0	0	0	0	0	0	29	0	0	0	0	0	0	0	5.55004e-05
Bacteria;Proteobacteria;Betaproteobacteria;Burkholderiales;Oxalobacteraceae;Herbaspirillum;Herbaspirillum_frisingense	0	29	0	0	0	0	0	0	0	5.50613e-05	0	0	0	0	0	0
Bacteria;Proteobacteria;Gammaproteobacteria;Alteromonadales;Pseudoalteromonadaceae;Pseudoalteromonas;Pseudoalteromonas_sp_UCD-33C	0	5	0	24	0	0	0	0	0	9.49332e-06	0	4.5559e-05	0	0	0	0
Bacteria;Proteobacteria;Betaproteobacteria;Neisseriales;Chromobacteriaceae;Chromobacterium;Chromobacterium_subtsugae	0	0	0	29	0	0	0	0	0	0	0	5.50505e-05	0	0	0	0
Bacteria;Actinobacteria;Actinobacteria;Micrococcales;Intrasporangiaceae;Kribbia;Kribbia_dieselivorans	0	0	0	29	0	0	0	0	0	0	0	5.50505e-05	0	0	0	0
Bacteria;Proteobacteria;Betaproteobacteria;Nitrosomonadales;Nitrosomonadaceae;Nitrosomonas;Nitrosomonas_sp_Nm33	0	0	0	29	0	0	0	0	0	0	0	5.50505e-05	0	0	0	0
Bacteria;Proteobacteria;Gammaproteobacteria;Pseudomonadales;Pseudomonadaceae;Pseudomonas;Pseudomonas_frederiksbergensis	0	0	0	29	0	0	0	0	0	0	0	5.50505e-05	0	0	0	0
Bacteria;Proteobacteria;Gammaproteobacteria;Pseudomonadales;Pseudomonadaceae;Pseudomonas;Pseudomonas_extremaustralis	0	0	29	0	0	0	0	0	0	0	5.50135e-05	0	0	0	0	0
Bacteria;Proteobacteria;Gammaproteobacteria;Pseudomonadales;Pseudomonadaceae;Pseudomonas;Pseudomonas_sp_31_R_17	0	0	29	0	0	0	0	0	0	0	5.50135e-05	0	0	0	0	0
Bacteria;Actinobacteria;Actinobacteria;Pseudonocardiales;Pseudonocardiaceae;Actinokineospora;Actinokineospora_spheciospongiae	0	0	0	13	0	0	16	0	0	0	0	2.46778e-05	0	0	2.89669e-05	0
Bacteria;Firmicutes;Bacilli;Lactobacillales;Leuconostocaceae;Fructobacillus;Fructobacillus_tropaeoli	0	0	0	0	0	0	0	28	0	0	0	0	0	0	0	5.35866e-05
Bacteria;Proteobacteria;Gammaproteobacteria;Enterobacterales;Morganellaceae;Xenorhabdus;Xenorhabdus_budapestensis	0	28	0	0	0	0	0	0	0	5.31626e-05	0	0	0	0	0	0
Bacteria;Firmicutes;Bacilli;Bacillales;Bacillaceae;Marinococcus;Marinococcus_halophilus	0	0	0	28	0	0	0	0	0	0	0	5.31522e-05	0	0	0	0
Bacteria;Proteobacteria;Betaproteobacteria;Burkholderiales;Burkholderiales_noname;Thiomonas;Thiomonas_sp_X19	0	0	0	0	34	0	0	0	0	0	0	0	5.22209e-05	0	0	0
Bacteria;Firmicutes;Bacilli;Lactobacillales;Streptococcaceae;Streptococcus;Streptococcus_mutans	20	0	0	2	0	9	0	0	3.50416e-05	0	0	3.79659e-06	0	1.32573e-05	0	0
Bacteria;Firmicutes;Bacilli;Lactobacillales;Lactobacillaceae;Lactobacillus;Lactobacillus_sp_159-4	0	0	0	0	0	0	0	27	0	0	0	0	0	0	0	5.16728e-05
Bacteria;Actinobacteria;Actinobacteria;Micrococcales;Microbacteriaceae;Leucobacter;Leucobacter_massiliensis	0	0	0	8	0	0	20	0	0	0	0	1.51863e-05	0	0	3.62086e-05	0
Bacteria;Bacteria_noname;Bacteria_noname;Bacteria_noname;Bacteria_noname;Bacteria_noname;bacterium_2013Arg42i	0	27	0	0	0	0	0	0	0	5.12639e-05	0	0	0	0	0	0
Bacteria;Proteobacteria;Gammaproteobacteria;Enterobacterales;Yersiniaceae;Rahnella;Rahnella_sp_Larv3_ips	0	27	0	0	0	0	0	0	0	5.12639e-05	0	0	0	0	0	0
Bacteria;Proteobacteria;Gammaproteobacteria;Pseudomonadales;Moraxellaceae;Acinetobacter;Acinetobacter_sp_1564232	0	0	0	27	0	0	0	0	0	0	0	5.12539e-05	0	0	0	0
Bacteria;Firmicutes;Bacilli;Bacillales;Bacillaceae;Bacillus;Bacillus_sp_AFS088145	0	0	0	27	0	0	0	0	0	0	0	5.12539e-05	0	0	0	0
Bacteria;Proteobacteria;Gammaproteobacteria;Enterobacterales;Erwiniaceae;Pantoea;Pantoea_rodasii	0	20	7	0	0	0	0	0	0	3.79733e-05	1.32791e-05	0	0	0	0	0
Bacteria;Proteobacteria;Gammaproteobacteria;Enterobacterales;Erwiniaceae;Pantoea;Pantoea_sp_ARC270	0	0	0	0	0	0	28	0	0	0	0	0	0	0	5.0692e-05	0
Bacteria;Cyanobacteria;Cyanobacteria_noname;Chroococcidiopsidales;Chroococcidiopsidaceae;Chroococcidiopsis;Chroococcidiopsis_sp_CCALA_051	0	0	0	0	0	0	0	26	0	0	0	0	0	0	0	4.9759e-05
Bacteria;Proteobacteria;Gammaproteobacteria;Enterobacterales;Enterobacteriaceae;Trabulsiella;Trabulsiella_odontotermitis	0	0	14	0	0	0	0	12	0	0	2.65583e-05	0	0	0	0	2.29657e-05
Bacteria;Firmicutes;Bacilli;Lactobacillales;Aerococcaceae;Aerococcus;Aerococcus_urinae	0	26	0	0	0	0	0	0	0	4.93653e-05	0	0	0	0	0	0
Bacteria;Proteobacteria;Gammaproteobacteria;Aeromonadales;Aeromonadaceae;Aeromonas;Aeromonas_encheleia	0	26	0	0	0	0	0	0	0	4.93653e-05	0	0	0	0	0	0
Bacteria;Proteobacteria;Betaproteobacteria;Burkholderiales;Burkholderiales_noname;Aquabacterium;Aquabacterium_sp_W35	0	26	0	0	0	0	0	0	0	4.93653e-05	0	0	0	0	0	0
Bacteria;Proteobacteria;Gammaproteobacteria;Enterobacterales;Enterobacteriaceae;Citrobacter;Citrobacter_sedlakii	0	26	0	0	0	0	0	0	0	4.93653e-05	0	0	0	0	0	0
Bacteria;Proteobacteria;Gammaproteobacteria;Enterobacterales;Enterobacteriaceae;Kosakonia;Kosakonia_sp_CCTCC_M2018092	0	0	0	26	0	0	0	0	0	0	0	4.93556e-05	0	0	0	0
Bacteria;Actinobacteria;Actinobacteria;Propionibacteriales;Nocardioidaceae;Nocardioides;Nocardioides_glacieisoli	0	0	0	26	0	0	0	0	0	0	0	4.93556e-05	0	0	0	0
Bacteria;Proteobacteria;Gammaproteobacteria;Pseudomonadales;Pseudomonadaceae;Pseudomonas;Pseudomonas_sp_BRG-100	0	0	0	26	0	0	0	0	0	0	0	4.93556e-05	0	0	0	0
Bacteria;Proteobacteria;Gammaproteobacteria;Vibrionales;Vibrionaceae;Vibrio;Vibrio_tasmaniensis	0	0	0	26	0	0	0	0	0	0	0	4.93556e-05	0	0	0	0
Bacteria;Firmicutes;Bacilli;Lactobacillales;Streptococcaceae;Streptococcus;Streptococcus_pasteurianus	0	0	0	0	32	0	0	0	0	0	0	0	4.91491e-05	0	0	0
Bacteria;Proteobacteria;Gammaproteobacteria;Enterobacterales;Yersiniaceae;Rouxiella;Rouxiella_badensis	0	0	15	0	0	0	0	10	0	0	2.84553e-05	0	0	0	0	1.91381e-05
Bacteria;Actinobacteria;Actinobacteria;Actinomycetales;Actinomycetaceae;Actinomyces;Actinomyces_urogenitalis	0	25	0	0	0	0	0	0	0	4.74666e-05	0	0	0	0	0	0
Bacteria;Firmicutes;Clostridia;Clostridiales;Clostridiaceae;Clostridium;Clostridium_sporogenes	0	25	0	0	0	0	0	0	0	4.74666e-05	0	0	0	0	0	0
Bacteria;Proteobacteria;Gammaproteobacteria;Enterobacterales;Enterobacteriaceae;Klebsiella;Klebsiella_sp_T11	0	25	0	0	0	0	0	0	0	4.74666e-05	0	0	0	0	0	0
Bacteria;Proteobacteria;Betaproteobacteria;Rhodocyclales;Zoogloeaceae;Thauera;Thauera_humireducens	0	25	0	0	0	0	0	0	0	4.74666e-05	0	0	0	0	0	0
Bacteria;Proteobacteria;Gammaproteobacteria;Pseudomonadales;Moraxellaceae;Acinetobacter;Acinetobacter_sp_MF4640	0	14	0	11	0	0	0	0	0	2.65813e-05	0	2.08812e-05	0	0	0	0
Bacteria;Proteobacteria;Gammaproteobacteria;Pseudomonadales;Moraxellaceae;Acinetobacter;Acinetobacter_nectaris	0	11	0	14	0	0	0	0	0	2.08853e-05	0	2.65761e-05	0	0	0	0
Bacteria;Proteobacteria;Gammaproteobacteria;Enterobacterales;Erwiniaceae;Erwinia;Erwinia_sp_Leaf53	0	9	0	16	0	0	0	0	0	1.7088e-05	0	3.03727e-05	0	0	0	0
Bacteria;Proteobacteria;Gammaproteobacteria;Pseudomonadales;Moraxellaceae;Acinetobacter;Acinetobacter_sp_SWBY1	0	0	0	25	0	0	0	0	0	0	0	4.74573e-05	0	0	0	0
Bacteria;Bacteroidetes;Cytophagia;Cytophagales;Hymenobacteraceae;Hymenobacter;Hymenobacter_psychrotolerans	0	0	0	25	0	0	0	0	0	0	0	4.74573e-05	0	0	0	0
Bacteria;Proteobacteria;Gammaproteobacteria;Pseudomonadales;Pseudomonadaceae;Pseudomonas;Pseudomonas_sp_34_E_7	0	0	0	25	0	0	0	0	0	0	0	4.74573e-05	0	0	0	0
Bacteria;Acidobacteria;Solibacteres;Solibacterales;Solibacteraceae;Candidatus_Sulfopaludibacter;Candidatus_Sulfopaludibacter_sp_SbA4	0	0	0	24	1	0	0	0	0	0	0	4.5559e-05	1.53591e-06	0	0	0
Bacteria;Proteobacteria;Gammaproteobacteria;Enterobacterales;Enterobacteriaceae;Escherichia;Escherichia_sp_E4702	0	0	0	0	30	0	0	0	0	0	0	0	4.60773e-05	0	0	0
Bacteria;Firmicutes;Bacilli;Lactobacillales;Lactobacillaceae;Lactobacillus;Lactobacillus_sp_M1575	0	0	0	0	0	0	0	24	0	0	0	0	0	0	0	4.59314e-05
Bacteria;Proteobacteria;Deltaproteobacteria;Deltaproteobacteria_noname;Deltaproteobacteria_noname;Deltaproteobacteria_noname;Deltaproteobacteria_bacterium	0	0	0	10	0	0	0	14	0	0	0	1.89829e-05	0	0	0	2.67933e-05
Bacteria;Cyanobacteria;Cyanobacteria_noname;Nostocales;Aphanizomenonaceae;Nodularia;Nodularia_spumigena	0	24	0	0	0	0	0	0	0	4.55679e-05	0	0	0	0	0	0
Bacteria;Proteobacteria;Gammaproteobacteria;Pseudomonadales;Moraxellaceae;Acinetobacter;Acinetobacter_sp_WCHAc060007	0	16	0	8	0	0	0	0	0	3.03786e-05	0	1.51863e-05	0	0	0	0
Bacteria;Proteobacteria;Gammaproteobacteria;Pseudomonadales;Moraxellaceae;Acinetobacter;Acinetobacter_sp_CIP_5382	0	9	0	15	0	0	0	0	0	1.7088e-05	0	2.84744e-05	0	0	0	0
Bacteria;Proteobacteria;Gammaproteobacteria;Xanthomonadales;Rhodanobacteraceae;Rhodanobacter;Rhodanobacter_sp_SCN_68-63	0	5	0	19	0	0	0	0	0	9.49332e-06	0	3.60676e-05	0	0	0	0
Bacteria;Actinobacteria;Actinobacteria;Micromonosporales;Micromonosporaceae;Verrucosispora;Verrucosispora_sp_MS100047	0	0	24	0	0	0	0	0	0	0	4.55284e-05	0	0	0	0	0
Bacteria;Proteobacteria;Gammaproteobacteria;Pseudomonadales;Moraxellaceae;Acinetobacter;Acinetobacter_sp_WCHAc060041	0	0	0	22	0	0	2	0	0	0	0	4.17624e-05	0	0	3.62086e-06	0
Bacteria;Actinobacteria;Actinobacteria;Micrococcales;Micrococcaceae;Kocuria;Kocuria_sp_WN036	0	0	0	0	0	0	25	0	0	0	0	0	0	0	4.52607e-05	0
Bacteria;Firmicutes;Bacilli;Bacillales;Bacillaceae;Bacillus;Bacillus_sp_SRB_28	4	20	0	0	0	0	0	0	7.00833e-06	3.79733e-05	0	0	0	0	0	0
Bacteria;Proteobacteria;Gammaproteobacteria;Enterobacterales;Pectobacteriaceae;Dickeya;Dickeya_paradisiaca	0	0	0	0	29	0	0	0	0	0	0	0	4.45414e-05	0	0	0
Bacteria;Cyanobacteria;Cyanobacteria_noname;Synechococcales;Leptolyngbyaceae;Phormidesmis;Phormidesmis_priestleyi	0	0	0	0	29	0	0	0	0	0	0	0	4.45414e-05	0	0	0
Bacteria;Actinobacteria;Actinobacteria;Pseudonocardiales;Pseudonocardiaceae;Kutzneria;Kutzneria_albida	0	0	0	12	0	0	12	0	0	0	0	2.27795e-05	0	0	2.17252e-05	0
Bacteria;Firmicutes;Bacilli;Lactobacillales;Lactobacillaceae;Lactobacillus;Lactobacillus_sp_257-1	0	0	0	0	0	0	0	23	0	0	0	0	0	0	0	4.40176e-05
Bacteria;Verrucomicrobia;Verrucomicrobia_noname;Verrucomicrobia_noname;Verrucomicrobia_noname;Verrucomicrobia_noname;Verrucomicrobia_bacterium	0	9	0	0	0	0	0	14	0	1.7088e-05	0	0	0	0	0	2.67933e-05
Bacteria;Proteobacteria;Betaproteobacteria;Burkholderiales;Alcaligenaceae;Achromobacter;Achromobacter_sp_2789STDY5608621	0	23	0	0	0	0	0	0	0	4.36693e-05	0	0	0	0	0	0
Bacteria;Proteobacteria;Gammaproteobacteria;Pseudomonadales;Moraxellaceae;Acinetobacter;Acinetobacter_sp_CIP_102637	0	23	0	0	0	0	0	0	0	4.36693e-05	0	0	0	0	0	0
Bacteria;Proteobacteria;Gammaproteobacteria;Aeromonadales;Aeromonadaceae;Aeromonas;Aeromonas_bivalvium	0	23	0	0	0	0	0	0	0	4.36693e-05	0	0	0	0	0	0
Bacteria;Proteobacteria;Alphaproteobacteria;Rhizobiales;Phyllobacteriaceae;Mesorhizobium;Mesorhizobium_delmotii	0	23	0	0	0	0	0	0	0	4.36693e-05	0	0	0	0	0	0
Bacteria;Actinobacteria;Actinobacteria;Micrococcales;Micrococcaceae;Arthrobacter;Arthrobacter_alpinus	0	0	0	23	0	0	0	0	0	0	0	4.36607e-05	0	0	0	0
Bacteria;Bacteria_noname;Bacteria_noname;Bacteria_noname;Bacteria_noname;Bacteria_noname;bacterium_ADurbBin429	0	0	0	23	0	0	0	0	0	0	0	4.36607e-05	0	0	0	0
Bacteria;Bacteroidetes;Cytophagia;Cytophagales;Hymenobacteraceae;Hymenobacter;Hymenobacter_sp_CRA2	0	0	0	23	0	0	0	0	0	0	0	4.36607e-05	0	0	0	0
Bacteria;Proteobacteria;Gammaproteobacteria;Thiotrichales;Thiotrichaceae;Leucothrix;Leucothrix_pacifica	0	0	0	23	0	0	0	0	0	0	0	4.36607e-05	0	0	0	0
Bacteria;Proteobacteria;Gammaproteobacteria;Enterobacterales;Erwiniaceae;Pantoea;Pantoea_sp_At-9b	0	6	0	0	21	0	0	0	0	1.1392e-05	0	0	3.22541e-05	0	0	0
Bacteria;Proteobacteria;Epsilonproteobacteria;Campylobacterales;Helicobacteraceae;Helicobacter;Helicobacter_sp_10-6591	0	0	0	0	28	0	0	0	0	0	0	0	4.30055e-05	0	0	0
Bacteria;Proteobacteria;Gammaproteobacteria;Pseudomonadales;Pseudomonadaceae;Pseudomonas;Pseudomonas_silesiensis	0	0	0	21	0	0	1.5	0	0	0	0	3.98641e-05	0	0	2.71564e-06	0
Bacteria;Proteobacteria;Gammaproteobacteria;Oceanospirillales;Halomonadaceae;Halomonas;Halomonas_meridiana	0	0	0	0	0	0	0	22	0	0	0	0	0	0	0	4.21038e-05
Bacteria;Firmicutes;Bacilli;Lactobacillales;Lactobacillaceae;Lactobacillus;Lactobacillus_lindneri	0	0	0	0	0	0	0	22	0	0	0	0	0	0	0	4.21038e-05
Bacteria;Proteobacteria;Gammaproteobacteria;Enterobacterales;Erwiniaceae;Pantoea;Pantoea_sp_ARC607	0	0	0	0	0	0	0	22	0	0	0	0	0	0	0	4.21038e-05
Bacteria;Proteobacteria;Gammaproteobacteria;Enterobacterales;Enterobacteriaceae;Enterobacter;Enterobacter_sp_R1(2018)	0	0	0	10	0	0	0	12	0	0	0	1.89829e-05	0	0	0	2.29657e-05
Bacteria;Firmicutes;Bacilli;Lactobacillales;Streptococcaceae;Lactococcus;Lactococcus_raffinolactis	0	22	0	0	0	0	0	0	0	4.17706e-05	0	0	0	0	0	0
Bacteria;Actinobacteria;Actinobacteria;Streptomycetales;Streptomycetaceae;Streptomyces;Streptomyces_sp_769	0	22	0	0	0	0	0	0	0	4.17706e-05	0	0	0	0	0	0
Bacteria;Proteobacteria;Gammaproteobacteria;Enterobacterales;Yersiniaceae;Yersinia;Yersinia_aldovae	0	22	0	0	0	0	0	0	0	4.17706e-05	0	0	0	0	0	0
Bacteria;Proteobacteria;Gammaproteobacteria;Pseudomonadales;Moraxellaceae;Acinetobacter;Acinetobacter_sp_MB5	0	0	0	22	0	0	0	0	0	0	0	4.17624e-05	0	0	0	0
Bacteria;Actinobacteria;Actinobacteria;Micrococcales;Microbacteriaceae;Cryobacterium;Cryobacterium_sp_TMN-42	0	0	0	22	0	0	0	0	0	0	0	4.17624e-05	0	0	0	0
Bacteria;Bacteroidetes;Cytophagia;Cytophagales;Hymenobacteraceae;Hymenobacter;Hymenobacter_daecheongensis	0	0	0	22	0	0	0	0	0	0	0	4.17624e-05	0	0	0	0
Bacteria;Bacteroidetes;Cytophagia;Cytophagales;Hymenobacteraceae;Hymenobacter;Hymenobacter_sp_APR13	0	0	0	22	0	0	0	0	0	0	0	4.17624e-05	0	0	0	0
Bacteria;Proteobacteria;Gammaproteobacteria;Oceanospirillales;Oceanospirillaceae;Marinobacterium;Marinobacterium_litorale	0	0	0	22	0	0	0	0	0	0	0	4.17624e-05	0	0	0	0
Bacteria;Proteobacteria;Alphaproteobacteria;Rhizobiales;Phyllobacteriaceae;Mesorhizobium;Mesorhizobium_sp_SOD10	0	0	0	22	0	0	0	0	0	0	0	4.17624e-05	0	0	0	0
Bacteria;Proteobacteria;Alphaproteobacteria;Rhizobiales;Methylobacteriaceae;Methylobacterium;Methylobacterium_aquaticum	0	0	0	22	0	0	0	0	0	0	0	4.17624e-05	0	0	0	0
Bacteria;Actinobacteria;Actinobacteria;Micrococcales;Micrococcaceae;Pseudarthrobacter;Pseudarthrobacter_chlorophenolicus	0	0	0	22	0	0	0	0	0	0	0	4.17624e-05	0	0	0	0
Bacteria;Proteobacteria;Gammaproteobacteria;Pseudomonadales;Pseudomonadaceae;Pseudomonas;Pseudomonas_sp_NZIPFR-PS2	0	0	0	22	0	0	0	0	0	0	0	4.17624e-05	0	0	0	0
Bacteria;Proteobacteria;Alphaproteobacteria;Rhizobiales;Rhizobiales_noname;Rhizobiales_noname;Rhizobiales_bacterium	0	0	0	22	0	0	0	0	0	0	0	4.17624e-05	0	0	0	0
Bacteria;Firmicutes;Bacilli;Lactobacillales;Enterococcaceae;Tetragenococcus;Tetragenococcus_solitarius	0	0	0	22	0	0	0	0	0	0	0	4.17624e-05	0	0	0	0
Bacteria;Proteobacteria;Gammaproteobacteria;Pseudomonadales;Pseudomonadales_noname;Pseudomonadales_noname;Pseudomonadales_bacterium_32-42-5	0	3	0	13	0	0	2	4	0	5.69599e-06	0	2.46778e-05	0	0	3.62086e-06	7.65523e-06
Bacteria;Actinobacteria;Actinobacteria;Micrococcales;Micrococcaceae;Enteractinococcus;Enteractinococcus_helveticum	0	0	0	0	0	0	23	0	0	0	0	0	0	0	4.16399e-05	0
Bacteria;Bacteroidetes;Cytophagia;Cytophagales;Hymenobacteraceae;Hymenobacter;Hymenobacter_sp_DG25B	0	0	0	21.5	0	0	0	0	0	0	0	4.08133e-05	0	0	0	0
Bacteria;Proteobacteria;Gammaproteobacteria;Enterobacterales;Enterobacteriaceae;Klebsiella;Klebsiella_sp_PO552	0	0	0	0	0	0	0	21	0	0	0	0	0	0	0	4.019e-05
Bacteria;Firmicutes;Bacilli;Lactobacillales;Lactobacillaceae;Lactobacillus;Lactobacillus_paralimentarius	0	0	0	0	0	0	0	21	0	0	0	0	0	0	0	4.019e-05
Bacteria;Proteobacteria;Betaproteobacteria;Neisseriales;Chromobacteriaceae;Laribacter;Laribacter_hongkongensis	0	0	0	0	0	0	0	21	0	0	0	0	0	0	0	4.019e-05
Bacteria;Firmicutes;Negativicutes;Veillonellales;Veillonellaceae;Lucifera;Lucifera_butyrica	0	0	0	0	0	0	0	21	0	0	0	0	0	0	0	4.019e-05
Bacteria;Firmicutes;Negativicutes;Veillonellales;Veillonellaceae;Megasphaera;Megasphaera_hexanoica	0	0	0	0	0	0	0	21	0	0	0	0	0	0	0	4.019e-05
Bacteria;Proteobacteria;Gammaproteobacteria;Enterobacterales;Enterobacteriaceae;Enterobacteriaceae_noname;Enterobacteriaceae_bacterium_9_2_54FAA	0	0	9	0	0	0	0	12	0	0	1.70732e-05	0	0	0	0	2.29657e-05
Bacteria;Proteobacteria;Alphaproteobacteria;Rhodobacterales;Rhodobacteraceae;Paracoccus;Paracoccus_sp_SYSUP0003	0	0	0	0	26	0	0	0	0	0	0	0	3.99336e-05	0	0	0
Bacteria;Proteobacteria;Betaproteobacteria;Burkholderiales;Alcaligenaceae;Achromobacter;Achromobacter_spanius	0	21	0	0	0	0	0	0	0	3.9872e-05	0	0	0	0	0	0
Bacteria;Proteobacteria;Alphaproteobacteria;Rhizobiales;Rhizobiaceae;Agrobacterium;Agrobacterium_tumefaciens	0	21	0	0	0	0	0	0	0	3.9872e-05	0	0	0	0	0	0
Bacteria;Proteobacteria;Gammaproteobacteria;Enterobacterales;Enterobacteriaceae;Enterobacter;Enterobacter_sp_B509	0	21	0	0	0	0	0	0	0	3.9872e-05	0	0	0	0	0	0
Bacteria;Proteobacteria;Gammaproteobacteria;Pseudomonadales;Moraxellaceae;Acinetobacter;Acinetobacter_sp_MDS7A	0	0	0	21	0	0	0	0	0	0	0	3.98641e-05	0	0	0	0
Bacteria;Proteobacteria;Betaproteobacteria;Burkholderiales;Burkholderiaceae;Burkholderia;Burkholderia_oklahomensis	0	0	0	21	0	0	0	0	0	0	0	3.98641e-05	0	0	0	0
Bacteria;Proteobacteria;Gammaproteobacteria;Xanthomonadales;Xanthomonadaceae;Luteimonas;Luteimonas_arsenica	0	0	0	21	0	0	0	0	0	0	0	3.98641e-05	0	0	0	0
Bacteria;Proteobacteria;Alphaproteobacteria;Rhizobiales;Aurantimonadaceae;Mangrovicella;Mangrovicella_endophytica	0	0	0	21	0	0	0	0	0	0	0	3.98641e-05	0	0	0	0
Bacteria;Proteobacteria;Gammaproteobacteria;Thiotrichales;Thiolinaceae;Thiolinea;Thiolinea_disciformis	0	0	0	21	0	0	0	0	0	0	0	3.98641e-05	0	0	0	0
Bacteria;Actinobacteria;Actinobacteria;Micrococcales;Micrococcaceae;Arthrobacter;Arthrobacter_echini	0	0	0	15	0	0	6	0	0	0	0	2.84744e-05	0	0	1.08626e-05	0
Bacteria;Proteobacteria;Betaproteobacteria;Burkholderiales;Burkholderiaceae;Burkholderia;Burkholderia_sp_lig30	0	0	0	0	0	0	0	20	0	0	0	0	0	0	0	3.82762e-05
Bacteria;Proteobacteria;Gammaproteobacteria;Pseudomonadales;Pseudomonadaceae;Pseudomonas;Pseudomonas_sp_UW4	0	0	13	0	0	0	0	7	0	0	2.46612e-05	0	0	0	0	1.33967e-05
Bacteria;Proteobacteria;Betaproteobacteria;Neisseriales;Chromobacteriaceae;Jeongeupia;Jeongeupia_sp_USM3	0	20	0	0	0	0	0	0	0	3.79733e-05	0	0	0	0	0	0
Bacteria;Proteobacteria;Gammaproteobacteria;Pseudomonadales;Pseudomonadaceae;Pseudomonas;Pseudomonas_furukawaii	0	9	0	11	0	0	0	0	0	1.7088e-05	0	2.08812e-05	0	0	0	0
Bacteria;Proteobacteria;Gammaproteobacteria;Aeromonadales;Aeromonadaceae;Aeromonas;Aeromonas_rivuli	0	0	0	20	0	0	0	0	0	0	0	3.79659e-05	0	0	0	0
Bacteria;Firmicutes;Erysipelotrichia;Erysipelotrichales;Erysipelotrichaceae;Catenibacterium;Catenibacterium_mitsuokai	0	0	0	20	0	0	0	0	0	0	0	3.79659e-05	0	0	0	0
Bacteria;Proteobacteria;Gammaproteobacteria;Enterobacterales;Erwiniaceae;Erwinia;Erwinia_pyrifoliae	0	0	0	20	0	0	0	0	0	0	0	3.79659e-05	0	0	0	0
Bacteria;Proteobacteria;Alphaproteobacteria;Rhizobiales;Phyllobacteriaceae;Mesorhizobium;Mesorhizobium_plurifarium	0	0	0	20	0	0	0	0	0	0	0	3.79659e-05	0	0	0	0
Bacteria;Proteobacteria;Betaproteobacteria;Burkholderiales;Alcaligenaceae;Parvibium;Parvibium_lacunae	0	0	0	20	0	0	0	0	0	0	0	3.79659e-05	0	0	0	0
Bacteria;Proteobacteria;Gammaproteobacteria;Pseudomonadales;Pseudomonadaceae;Pseudomonas;Pseudomonas_sp_VI41	0	0	0	20	0	0	0	0	0	0	0	3.79659e-05	0	0	0	0
Bacteria;Proteobacteria;Gammaproteobacteria;Enterobacterales;Enterobacteriaceae;Escherichia;Escherichia_sp_MOD1-EC5457	0	0	4	16	0	0	0	0	0	0	7.58807e-06	3.03727e-05	0	0	0	0
Bacteria;Firmicutes;Bacilli;Lactobacillales;Lactobacillaceae;Lactobacillus;Lactobacillus_sp_33-1	0	18	0	0	2	0	0	0	0	3.4176e-05	0	0	3.07182e-06	0	0	0
Bacteria;Firmicutes;Bacilli;Bacillales;Staphylococcaceae;Staphylococcus;Staphylococcus_succinus	0	18	0	0	2	0	0	0	0	3.4176e-05	0	0	3.07182e-06	0	0	0
Bacteria;Proteobacteria;Alphaproteobacteria;Rhizobiales;Phyllobacteriaceae;Mesorhizobium;Mesorhizobium_sp_LNJC374B00	0	0	0	0	0	0	0	19	0	0	0	0	0	0	0	3.63623e-05
Bacteria;Firmicutes;Bacilli;Bacillales;Staphylococcaceae;Staphylococcus;Staphylococcus_hominis	0	0	0	0	0	0	0	19	0	0	0	0	0	0	0	3.63623e-05
Bacteria;Actinobacteria;Actinobacteria;Micrococcales;Microbacteriaceae;Clavibacter;Clavibacter_michiganensis	0	0	0	18	0	0	0	1	0	0	0	3.41693e-05	0	0	0	1.91381e-06
Bacteria;Proteobacteria;Betaproteobacteria;Burkholderiales;Alcaligenaceae;Achromobacter;Achromobacter_sp_LMG_30378	0	19	0	0	0	0	0	0	0	3.60746e-05	0	0	0	0	0	0
Bacteria;Proteobacteria;Gammaproteobacteria;Pseudomonadales;Moraxellaceae;Acinetobacter;Acinetobacter_sp_LoGeW2-3	0	19	0	0	0	0	0	0	0	3.60746e-05	0	0	0	0	0	0
Bacteria;Actinobacteria;Coriobacteriia;Eggerthellales;Eggerthellaceae;Gordonibacter;Gordonibacter_sp_An230	0	19	0	0	0	0	0	0	0	3.60746e-05	0	0	0	0	0	0
Bacteria;Proteobacteria;Gammaproteobacteria;Enterobacterales;Yersiniaceae;Serratia;Serratia_sp_M24T3	0	19	0	0	0	0	0	0	0	3.60746e-05	0	0	0	0	0	0
Bacteria;Proteobacteria;Gammaproteobacteria;Aeromonadales;Aeromonadaceae;Zobellella;Zobellella_denitrificans	0	19	0	0	0	0	0	0	0	3.60746e-05	0	0	0	0	0	0
Bacteria;Actinobacteria;Actinobacteria;Micrococcales;Promicromonosporaceae;Promicromonospora;Promicromonospora_sp_CF082	0	11	0	8	0	0	0	0	0	2.08853e-05	0	1.51863e-05	0	0	0	0
Bacteria;Proteobacteria;Gammaproteobacteria;Enterobacterales;Enterobacteriaceae;Enterobacteriaceae_noname;Enterobacteriaceae_bacterium_ENNIH1	0	0	0	19	0	0	0	0	0	0	0	3.60676e-05	0	0	0	0
Bacteria;Bacteroidetes;Cytophagia;Cytophagales;Hymenobacteraceae;Hymenobacter;Hymenobacter_norwichensis	0	0	0	19	0	0	0	0	0	0	0	3.60676e-05	0	0	0	0
Bacteria;Actinobacteria;Actinobacteria;Micrococcales;Microbacteriaceae;Mycetocola;Mycetocola_saprophilus	0	0	0	19	0	0	0	0	0	0	0	3.60676e-05	0	0	0	0
Bacteria;Proteobacteria;Alphaproteobacteria;Rhodobacterales;Rhodobacteraceae;Thioclava;Thioclava_sp_F1Mire-8	0	0	0	19	0	0	0	0	0	0	0	3.60676e-05	0	0	0	0
Bacteria;Firmicutes;Bacilli;Lactobacillales;Enterococcaceae;Vagococcus;Vagococcus_sp_SS1995	0	14	5	0	0	0	0	0	0	2.65813e-05	9.48509e-06	0	0	0	0	0
Bacteria;Proteobacteria;Gammaproteobacteria;Enterobacterales;Enterobacteriaceae;Citrobacter;Citrobacter_freundii_complex_sp_CFNIH11	0	0	19	0	0	0	0	0	0	0	3.60434e-05	0	0	0	0	0
Bacteria;Proteobacteria;Gammaproteobacteria;Enterobacterales;Enterobacteriaceae;Escherichia;Escherichia_sp_MOD1-EC6100	0	0	0	0	0	3	17	0	0	0	0	0	0	4.41909e-06	3.07773e-05	0
Bacteria;Proteobacteria;Gammaproteobacteria;Enterobacterales;Enterobacteriaceae;Franconibacter;Franconibacter_helveticus	0	0	0	12	0	0	0	6	0	0	0	2.27795e-05	0	0	0	1.14828e-05
Bacteria;Proteobacteria;Alphaproteobacteria;Caulobacterales;Caulobacteraceae;Caulobacter;Caulobacter_sp_Root1455	0	0	0	17	0	0	0	1	0	0	0	3.2271e-05	0	0	0	1.91381e-06
Bacteria;Proteobacteria;Betaproteobacteria;Burkholderiales;Comamonadaceae;Delftia;Delftia_sp_RIT313	0	18	0	0	0	0	0	0	0	3.4176e-05	0	0	0	0	0	0
Bacteria;Proteobacteria;Betaproteobacteria;Burkholderiales;Oxalobacteraceae;Janthinobacterium;Janthinobacterium_sp_HH100	0	18	0	0	0	0	0	0	0	3.4176e-05	0	0	0	0	0	0
Bacteria;Proteobacteria;Alphaproteobacteria;Rhizobiales;Methylobacteriaceae;Methylobacterium;Methylobacterium_radiotolerans	0	18	0	0	0	0	0	0	0	3.4176e-05	0	0	0	0	0	0
Bacteria;Proteobacteria;Gammaproteobacteria;Xanthomonadales;Rhodanobacteraceae;Rhodanobacter;Rhodanobacter_thiooxydans	0	18	0	0	0	0	0	0	0	3.4176e-05	0	0	0	0	0	0
Bacteria;Firmicutes;Bacilli;Lactobacillales;Streptococcaceae;Streptococcus;Streptococcus_merionis	0	18	0	0	0	0	0	0	0	3.4176e-05	0	0	0	0	0	0
Bacteria;Proteobacteria;Gammaproteobacteria;Enterobacterales;Erwiniaceae;Pantoea;[Curtobacterium]_plantarum	0	0	0	18	0	0	0	0	0	0	0	3.41693e-05	0	0	0	0
Bacteria;Proteobacteria;Betaproteobacteria;Burkholderiales;Alcaligenaceae;Alcaligenes;Alcaligenes_faecalis	0	0	0	18	0	0	0	0	0	0	0	3.41693e-05	0	0	0	0
Bacteria;Firmicutes;Bacilli;Bacillales;Bacillaceae;Bacillus;Bacillus_gaemokensis	0	0	0	18	0	0	0	0	0	0	0	3.41693e-05	0	0	0	0
Bacteria;Firmicutes;Bacilli;Bacillales;Bacillaceae;Bacillus;Bacillus_sp_OV186	0	0	0	18	0	0	0	0	0	0	0	3.41693e-05	0	0	0	0
Bacteria;Acidobacteria;Holophagae;Holophagae_noname;Holophagae_noname;Holophagae_noname;Holophagae_bacterium	0	0	0	18	0	0	0	0	0	0	0	3.41693e-05	0	0	0	0
Bacteria;Actinobacteria;Actinobacteria;Propionibacteriales;Nocardioidaceae;Pimelobacter;Pimelobacter_simplex	0	0	0	18	0	0	0	0	0	0	0	3.41693e-05	0	0	0	0
Bacteria;Proteobacteria;Gammaproteobacteria;Pseudomonadales;Pseudomonadaceae;Pseudomonas;Pseudomonas_sp_DR_5-09	0	0	0	18	0	0	0	0	0	0	0	3.41693e-05	0	0	0	0
Bacteria;Proteobacteria;Gammaproteobacteria;Xanthomonadales;Xanthomonadaceae;Pseudoxanthomonas;Pseudoxanthomonas_sp_Root630	0	0	0	18	0	0	0	0	0	0	0	3.41693e-05	0	0	0	0
Bacteria;Proteobacteria;Alphaproteobacteria;Rhodobacterales;Rhodobacteraceae;Rhodobacteraceae_noname;Rhodobacteraceae_bacterium_CG2_30_10_405	0	0	0	18	0	0	0	0	0	0	0	3.41693e-05	0	0	0	0
Bacteria;Firmicutes;Bacilli;Lactobacillales;Lactobacillaceae;Lactobacillus;Lactobacillus_uvarum	1	17	0	0	0	0	0	0	1.75208e-06	3.22773e-05	0	0	0	0	0	0
Bacteria;Proteobacteria;Epsilonproteobacteria;Campylobacterales;Campylobacteraceae;Campylobacter;Campylobacter_pinnipediorum	0	0	0	0	22	0	0	0	0	0	0	0	3.379e-05	0	0	0
[truncated: 365 more rows]

## Sheet: 16S rRNA sequencing
taxonomy	HG-1_tags	HG-2_tags	HG-3_tags	HG-4_tags	HXQ-1_tags	HXQ-2_tags	HXQ-3_tags	HXQ-4_tags	HG-1_relative_abundance	HG-2_relative_abundance	HG-3_relative_abundance	HG-4_relative_abundance	HXQ-1_relative_abundance	HXQ-2_relative_abundance	HXQ-3_relative_abundance	HXQ-4_relative_abundance
Bacteria	67289	76260	59213	63766	53556	52562	31311	56995	99.9941	99.9934	99.9983	99.9969	100	100	99.9904	100
Archaea	4	5	1	2	0	0	3	0	0.00594415	0.00655609	0.00168879	0.00313637	0	0	0.00958038	0
Bacteria;Proteobacteria	58766	50188	57442	58109	43009	51818	28036	55934	87.3285	65.8074	97.0075	91.1256	80.3066	98.5845	89.5318	98.1384
Bacteria;Firmicutes	7828	24925	1608	4581	10133	591	2718	936	11.6327	32.6821	2.71557	7.18385	18.9204	1.12439	8.67982	1.64225
Bacteria;Actinobacteria	168	209	37	807	40	34	33	42	0.249654	0.274044	0.0624852	1.26553	0.0746882	0.0646855	0.105384	0.0736907
Bacteria;Bacteroidetes	46	265	17	130	19	5	308	6	0.0683578	0.347473	0.0287094	0.203864	0.0354769	0.00951258	0.983586	0.0105272
Bacteria;Tenericutes	72	87	1	1	100	12	9	2	0.106995	0.114076	0.00168879	0.00156818	0.18672	0.0228302	0.0287411	0.00350908
Bacteria;Cyanobacteria	41	61	9	7	24	1	12	3	0.0609276	0.0799843	0.0151991	0.0109773	0.0448129	0.00190252	0.0383215	0.00526362
Bacteria;Thermotogae	3	41	0	11	1	0	1	1	0.00445812	0.0537599	0	0.01725	0.0018672	0	0.00319346	0.00175454
Bacteria;Chloroflexi	12	8	9	15	2	0	0	0	0.0178325	0.0104897	0.0151991	0.0235228	0.00373441	0	0	0
Bacteria;Epsilonbacteraeota	5	1	0	1	17	1	0	0	0.00743019	0.00131122	0	0.00156818	0.0317425	0.00190252	0	0
Bacteria;Patescibacteria	10	9	0	3	2	2	0	0	0.0148604	0.011801	0	0.00470455	0.00373441	0.00380503	0	0
Bacteria;Deinococcus-Thermus	1	6	7	2	2	1	0	4	0.00148604	0.0078673	0.0118215	0.00313637	0.00373441	0.00190252	0	0.00701816
Bacteria;Planctomycetes	0	10	1	5	5	2	0	0	0	0.0131122	0.00168879	0.00784092	0.00933602	0.00380503	0	0
Bacteria;Verrucomicrobia	1	6	3	0	3	3	0	1	0.00148604	0.0078673	0.00506637	0	0.00560161	0.00570755	0	0.00175454
Archaea;Euryarchaeota	4	5	1	2	0	0	3	0	0.00594415	0.00655609	0.00168879	0.00313637	0	0	0.00958038	0
Bacteria;Fusobacteria	0	0	0	0	1	4	3	0	0	0	0	0	0.0018672	0.00761006	0.00958038	0
Bacteria;Synergistetes	1	11	1	0	0	0	0	0	0.00148604	0.0144234	0.00168879	0	0	0	0	0
Bacteria;Coprothermobacteraeota	0	5	0	0	0	0	0	0	0	0.00655609	0	0	0	0	0	0
Bacteria;Atribacteria	1	1	0	0	0	0	0	0	0.00148604	0.00131122	0	0	0	0	0	0
Bacteria;Chlamydiae	0	2	0	0	0	0	0	0	0	0.00262243	0	0	0	0	0	0
Bacteria;Spirochaetes	0	2	0	0	0	0	0	0	0	0.00262243	0	0	0	0	0	0
Bacteria;Proteobacteria;Gammaproteobacteria	58737	50046	57424	58027	42984	51803	27996	55919	87.2855	65.6212	96.9771	90.9971	80.2599	98.556	89.4041	98.1121
Bacteria;Firmicutes;Bacilli	7776	24698	1533	4337	10040	557	2653	909	11.5554	32.3844	2.58891	6.80122	18.7467	1.0597	8.47225	1.59488
Bacteria;Actinobacteria;Actinobacteria	168	206	36	798	40	34	29	40	0.249654	0.270111	0.0607964	1.25141	0.0746882	0.0646855	0.0926103	0.0701816
Bacteria;Bacteroidetes;Bacteroidia	46	265	17	130	19	5	308	6	0.0683578	0.347473	0.0287094	0.203864	0.0354769	0.00951258	0.983586	0.0105272
Bacteria;Firmicutes;Clostridia	39	172	72	234	89	31	36	26	0.0579555	0.225529	0.121593	0.366955	0.166181	0.058978	0.114965	0.045618
Bacteria;Proteobacteria;Alphaproteobacteria	25	133	18	76	22	11	40	11	0.037151	0.174392	0.0303982	0.119182	0.0410785	0.0209277	0.127738	0.0192999
Bacteria;Tenericutes;Mollicutes	72	87	1	1	100	12	9	2	0.106995	0.114076	0.00168879	0.00156818	0.18672	0.0228302	0.0287411	0.00350908
Bacteria;Cyanobacteria;Oxyphotobacteria	41	61	9	7	24	1	12	3	0.0609276	0.0799843	0.0151991	0.0109773	0.0448129	0.00190252	0.0383215	0.00526362
Bacteria;Firmicutes;Negativicutes	4	25	0	7	2	2	19	1	0.00594415	0.0327804	0	0.0109773	0.00373441	0.00380503	0.0606757	0.00175454
Bacteria;Thermotogae;Thermotogae	3	41	0	11	1	0	1	1	0.00445812	0.0537599	0	0.01725	0.0018672	0	0.00319346	0.00175454
Bacteria;Chloroflexi;Anaerolineae	12	8	9	15	2	0	0	0	0.0178325	0.0104897	0.0151991	0.0235228	0.00373441	0	0	0
Bacteria;Firmicutes;Erysipelotrichia	8	9	0	0	0	1	6	0	0.0118883	0.011801	0	0	0	0.00190252	0.0191608	0
Bacteria;Epsilonbacteraeota;Campylobacteria	5	1	0	1	17	1	0	0	0.00743019	0.00131122	0	0.00156818	0.0317425	0.00190252	0	0
Bacteria;Deinococcus-Thermus;Deinococci	1	6	7	2	2	1	0	4	0.00148604	0.0078673	0.0118215	0.00313637	0.00373441	0.00190252	0	0.00701816
Bacteria;Planctomycetes;Planctomycetacia	0	10	1	5	5	2	0	0	0	0.0131122	0.00168879	0.00784092	0.00933602	0.00380503	0	0
Bacteria;Verrucomicrobia;Verrucomicrobiae	1	6	3	0	3	3	0	1	0.00148604	0.0078673	0.00506637	0	0.00560161	0.00570755	0	0.00175454
Bacteria;Actinobacteria;Coriobacteriia	0	2	0	2	0	0	4	2	0	0.00262243	0	0.00313637	0	0	0.0127738	0.00350908
Archaea;Euryarchaeota;Methanomicrobia	1	3	1	2	0	0	3	0	0.00148604	0.00393365	0.00168879	0.00313637	0	0	0.00958038	0
Bacteria;Fusobacteria;Fusobacteriia	0	0	0	0	1	4	3	0	0	0	0	0	0.0018672	0.00761006	0.00958038	0
Bacteria;Synergistetes;Synergistia	1	11	1	0	0	0	0	0	0.00148604	0.0144234	0.00168879	0	0	0	0	0
Bacteria;Patescibacteria;WS6_Dojkabacteria	7	2	0	2	0	0	0	0	0.0104023	0.00262243	0	0.00313637	0	0	0	0
Bacteria;Actinobacteria;Thermoleophilia	0	0	0	5	0	0	0	0	0	0	0	0.00784092	0	0	0	0
Bacteria;Patescibacteria;Parcubacteria	0	3	0	0	0	2	0	0	0	0.00393365	0	0	0	0.00380503	0	0
Archaea;Euryarchaeota;Methanobacteria	3	2	0	0	0	0	0	0	0.00445812	0.00262243	0	0	0	0	0	0
Bacteria;Coprothermobacteraeota;Coprothermobacteria	0	5	0	0	0	0	0	0	0	0.00655609	0	0	0	0	0	0
Bacteria;Patescibacteria;Saccharimonadia	0	2	0	0	2	0	0	0	0	0.00262243	0	0	0.00373441	0	0	0
Bacteria;Actinobacteria;Rubrobacteria	0	1	1	2	0	0	0	0	0	0.00131122	0.00168879	0.00313637	0	0	0	0
Bacteria;Firmicutes;Limnochordia	0	3	0	1	0	0	0	0	0	0.00393365	0	0.00156818	0	0	0	0
Bacteria;Proteobacteria;Deltaproteobacteria	0	0	0	0	0	0	0	2	0	0	0	0	0	0	0	0.00350908
Bacteria;Patescibacteria;ABY1	2	0	0	0	0	0	0	0	0.00297208	0	0	0	0	0	0	0
Bacteria;Patescibacteria;Berkelbacteria	0	1	0	1	0	0	0	0	0	0.00131122	0	0.00156818	0	0	0	0
Bacteria;Atribacteria;Caldatribacteriia	1	1	0	0	0	0	0	0	0.00148604	0.00131122	0	0	0	0	0	0
Bacteria;Chlamydiae;Chlamydiae	0	2	0	0	0	0	0	0	0	0.00262243	0	0	0	0	0	0
Bacteria;Spirochaetes;Spirochaetia	0	2	0	0	0	0	0	0	0	0.00262243	0	0	0	0	0	0
Bacteria;Proteobacteria;Gammaproteobacteria;Enterobacteriales	57972	37830	35180	30625	41756	51188	26887	46422	86.1486	49.6034	59.4116	48.0257	77.967	97.3859	85.8626	81.4492
Bacteria;Proteobacteria;Gammaproteobacteria;Pseudomonadales	679	11483	20595	26753	1126	542	1011	8840	1.00902	15.0567	34.7806	41.9536	2.10247	1.03116	3.22859	15.5101
Bacteria;Firmicutes;Bacilli;Lactobacillales	7746	24591	1525	4320	10036	550	2648	901	11.5109	32.2441	2.5754	6.77456	18.7393	1.04638	8.45628	1.58084
Bacteria;Actinobacteria;Actinobacteria;Micrococcales	14	28	31	778	14	13	18	18	0.0208045	0.0367141	0.0523525	1.22005	0.0261409	0.0247327	0.0574823	0.0315817
Bacteria;Bacteroidetes;Bacteroidia;Bacteroidales	35	129	13	28	7	4	302	4	0.0520114	0.169147	0.0219543	0.0439092	0.0130704	0.00761006	0.964425	0.00701816
Bacteria;Firmicutes;Clostridia;Clostridiales	35	150	72	231	87	31	36	26	0.0520114	0.196683	0.121593	0.362251	0.162447	0.058978	0.114965	0.045618
Bacteria;Proteobacteria;Gammaproteobacteria;Aeromonadales	1	369	33	20	3	6	6	3	0.00148604	0.483839	0.0557301	0.0313637	0.00560161	0.0114151	0.0191608	0.00526362
Bacteria;Tenericutes;Mollicutes;Mycoplasmatales	71	85	1	1	100	12	9	2	0.105509	0.111453	0.00168879	0.00156818	0.18672	0.0228302	0.0287411	0.00350908
Bacteria;Actinobacteria;Actinobacteria;Corynebacteriales	107	132	1	5	19	14	3	14	0.159006	0.173081	0.00168879	0.00784092	0.0354769	0.0266352	0.00958038	0.0245636
Bacteria;Proteobacteria;Alphaproteobacteria;Rickettsiales	5	68	8	16	10	0	35	5	0.00743019	0.0891628	0.0135103	0.025091	0.018672	0	0.111771	0.0087727
Bacteria;Proteobacteria;Gammaproteobacteria;Betaproteobacteriales	8	17	75	34	4	3	1	20	0.0118883	0.0222907	0.126659	0.0533183	0.00746882	0.00570755	0.00319346	0.0350908
Bacteria;Firmicutes;Bacilli;Bacillales	29	101	8	11	4	5	4	8	0.0430951	0.132433	0.0135103	0.01725	0.00746882	0.00951258	0.0127738	0.0140363
Bacteria;Cyanobacteria;Oxyphotobacteria;Chloroplast	41	61	3	5	9	1	4	3	0.0609276	0.0799843	0.00506637	0.00784092	0.0168048	0.00190252	0.0127738	0.00526362
Bacteria;Proteobacteria;Alphaproteobacteria;Rhizobiales	11	30	0	39	3	7	4	4	0.0163464	0.0393365	0	0.0611592	0.00560161	0.0133176	0.0127738	0.00701816
Bacteria;Bacteroidetes;Bacteroidia;Flavobacteriales	2	89	0	7	7	0	2	1	0.00297208	0.116698	0	0.0109773	0.0130704	0	0.00638692	0.00175454
Bacteria;Actinobacteria;Actinobacteria;Actinomycetales	31	29	1	9	4	5	1	6	0.0460672	0.0380253	0.00168879	0.0141137	0.00746882	0.00951258	0.00319346	0.0105272
Bacteria;Bacteroidetes;Bacteroidia;Cytophagales	0	0	2	75	0	0	0	0	0	0	0.00337758	0.117614	0	0	0	0
Bacteria;Firmicutes;Negativicutes;Selenomonadales	4	25	0	7	2	2	19	1	0.00594415	0.0327804	0	0.0109773	0.00373441	0.00380503	0.0606757	0.00175454
Bacteria;Proteobacteria;Alphaproteobacteria;Rhodobacterales	8	20	6	19	7	4	1	2	0.0118883	0.0262243	0.0101327	0.0297955	0.0130704	0.00761006	0.00319346	0.00350908
Bacteria;Thermotogae;Thermotogae;Petrotogales	3	41	0	11	1	0	1	1	0.00445812	0.0537599	0	0.01725	0.0018672	0	0.00319346	0.00175454
Bacteria;Bacteroidetes;Bacteroidia;Sphingobacteriales	1	27	2	17	1	0	3	0	0.00148604	0.0354029	0.00337758	0.0266591	0.0018672	0	0.00958038	0
Bacteria;Cyanobacteria;Oxyphotobacteria;Nostocales	0	0	6	0	15	0	8	0	0	0	0.0101327	0	0.0280081	0	0.0255477	0
Bacteria;Chloroflexi;Anaerolineae;Anaerolineales	11	5	7	12	2	0	0	0	0.0163464	0.00655609	0.0118215	0.0188182	0.00373441	0	0	0
Bacteria;Bacteroidetes;Bacteroidia;Chitinophagales	8	20	0	3	4	1	1	1	0.0118883	0.0262243	0	0.00470455	0.00746882	0.00190252	0.00319346	0.00175454
Bacteria;Firmicutes;Erysipelotrichia;Erysipelotrichales	8	9	0	0	0	1	6	0	0.0118883	0.011801	0	0	0	0.00190252	0.0191608	0
Bacteria;Epsilonbacteraeota;Campylobacteria;Campylobacterales	5	1	0	1	17	1	0	0	0.00743019	0.00131122	0	0.00156818	0.0317425	0.00190252	0	0
Bacteria;Deinococcus-Thermus;Deinococci;Deinococcales	1	6	7	2	2	1	0	4	0.00148604	0.0078673	0.0118215	0.00313637	0.00373441	0.00190252	0	0.00701816
Bacteria;Actinobacteria;Actinobacteria;Bifidobacteriales	4	5	1	1	0	0	6	1	0.00594415	0.00655609	0.00168879	0.00156818	0	0	0.0191608	0.00175454
Bacteria;Planctomycetes;Planctomycetacia;Pirellulales	0	10	1	5	5	2	0	0	0	0.0131122	0.00168879	0.00784092	0.00933602	0.00380503	0	0
Bacteria;Firmicutes;Clostridia;MBA03	3	12	0	3	2	0	0	0	0.00445812	0.0157346	0	0.00470455	0.00373441	0	0	0
Bacteria;Verrucomicrobia;Verrucomicrobiae;Verrucomicrobiales	1	6	3	0	3	3	0	1	0.00148604	0.0078673	0.00506637	0	0.00560161	0.00570755	0	0.00175454
Bacteria;Proteobacteria;Alphaproteobacteria;Caulobacterales	1	14	0	1	2	0	0	0	0.00148604	0.018357	0	0.00156818	0.00373441	0	0	0
Bacteria;Actinobacteria;Coriobacteriia;Coriobacteriales	0	2	0	2	0	0	4	2	0	0.00262243	0	0.00313637	0	0	0.0127738	0.00350908
Archaea;Euryarchaeota;Methanomicrobia;Methanosarcinales	1	3	1	2	0	0	3	0	0.00148604	0.00393365	0.00168879	0.00313637	0	0	0.00958038	0
Bacteria;Fusobacteria;Fusobacteriia;Fusobacteriales	0	0	0	0	1	4	3	0	0	0	0	0	0.0018672	0.00761006	0.00958038	0
Bacteria;Synergistetes;Synergistia;Synergistales	1	11	1	0	0	0	0	0	0.00148604	0.0144234	0.00168879	0	0	0	0	0
Bacteria;Actinobacteria;Actinobacteria;Propionibacteriales	6	3	0	0	1	0	0	0	0.00891623	0.00393365	0	0	0.0018672	0	0	0
Bacteria;Chloroflexi;Anaerolineae;SJA-15	1	3	2	3	0	0	0	0	0.00148604	0.00393365	0.00337758	0.00470455	0	0	0	0
Bacteria;Firmicutes;Clostridia;DTU014	1	7	0	0	0	0	0	0	0.00148604	0.00917852	0	0	0	0	0	0
Bacteria;Actinobacteria;Actinobacteria;Frankiales	0	1	1	1	0	2	0	1	0	0.00131122	0.00168879	0.00156818	0	0.00380503	0	0.00175454
Bacteria;Actinobacteria;Actinobacteria;Pseudonocardiales	1	4	1	0	0	0	0	0	0.00148604	0.00524487	0.00168879	0	0	0	0	0
Bacteria;Proteobacteria;Gammaproteobacteria;Oceanospirillales	3	3	0	0	0	0	0	0	0.00445812	0.00393365	0	0	0	0	0	0
Bacteria;Proteobacteria;Gammaproteobacteria;Alteromonadales	0	2	1	0	1	0	0	1	0	0.00262243	0.00168879	0	0.0018672	0	0	0.00175454
Bacteria;Actinobacteria;Thermoleophilia;Solirubrobacterales	0	0	0	5	0	0	0	0	0	0	0	0.00784092	0	0	0	0
Archaea;Euryarchaeota;Methanobacteria;Methanobacteriales	3	2	0	0	0	0	0	0	0.00445812	0.00262243	0	0	0	0	0	0
Bacteria;Coprothermobacteraeota;Coprothermobacteria;Coprothermobacterales	0	5	0	0	0	0	0	0	0	0.00655609	0	0	0	0	0	0
Bacteria;Patescibacteria;Saccharimonadia;Saccharimonadales	0	2	0	0	2	0	0	0	0	0.00262243	0	0	0.00373441	0	0	0
Bacteria;Actinobacteria;Rubrobacteria;Rubrobacterales	0	1	1	2	0	0	0	0	0	0.00131122	0.00168879	0.00313637	0	0	0	0
Bacteria;Firmicutes;Limnochordia;Limnochordales	0	3	0	1	0	0	0	0	0	0.00393365	0	0.00156818	0	0	0	0
Bacteria;Tenericutes;Mollicutes;Haloplasmatales	1	2	0	0	0	0	0	0	0.00148604	0.00262243	0	0	0	0	0	0
Bacteria;Patescibacteria;Parcubacteria;Candidatus_Moranbacteria	0	3	0	0	0	0	0	0	0	0.00393365	0	0	0	0	0	0
Bacteria;Patescibacteria;Parcubacteria;Candidatus_Kaiserbacteria	0	0	0	0	0	2	0	0	0	0	0	0	0	0.00380503	0	0
Bacteria;Proteobacteria;Gammaproteobacteria;Competibacterales	0	0	0	0	2	0	0	0	0	0	0	0	0.00373441	0	0	0
Bacteria;Proteobacteria;Deltaproteobacteria;Desulfovibrionales	0	0	0	0	0	0	0	2	0	0	0	0	0	0	0	0.00350908
Bacteria;Proteobacteria;Alphaproteobacteria;Acetobacterales	0	0	2	0	0	0	0	0	0	0	0.00337758	0	0	0	0	0
Bacteria;Proteobacteria;Alphaproteobacteria;Sphingomonadales	0	0	2	0	0	0	0	0	0	0	0.00337758	0	0	0	0	0
Bacteria;Cyanobacteria;Oxyphotobacteria;Leptolyngbyales	0	0	0	2	0	0	0	0	0	0	0	0.00313637	0	0	0	0
Bacteria;Patescibacteria;ABY1;Candidatus_Kerfeldbacteria	2	0	0	0	0	0	0	0	0.00297208	0	0	0	0	0	0	0
Bacteria;Proteobacteria;Alphaproteobacteria;Azospirillales	0	1	0	1	0	0	0	0	0	0.00131122	0	0.00156818	0	0	0	0
Bacteria;Patescibacteria;Berkelbacteria;candidate_division_WS2_bacterium_ADurbBin280	0	1	0	1	0	0	0	0	0	0.00131122	0	0.00156818	0	0	0	0
Bacteria;Atribacteria;Caldatribacteriia;Caldatribacteriales	1	1	0	0	0	0	0	0	0.00148604	0.00131122	0	0	0	0	0	0
Bacteria;Chlamydiae;Chlamydiae;Chlamydiales	0	2	0	0	0	0	0	0	0	0.00262243	0	0	0	0	0	0
Bacteria;Spirochaetes;Spirochaetia;Spirochaetales	0	2	0	0	0	0	0	0	0	0.00262243	0	0	0	0	0	0
Bacteria;Actinobacteria;Actinobacteria;Streptosporangiales	0	2	0	0	0	0	0	0	0	0.00262243	0	0	0	0	0	0
Bacteria;Proteobacteria;Gammaproteobacteria;Xanthomonadales	0	2	0	0	0	0	0	0	0	0.00262243	0	0	0	0	0	0
Bacteria;Proteobacteria;Gammaproteobacteria;Enterobacteriales;Enterobacteriaceae	57972	37830	35180	30625	41756	51188	26887	46422	86.1486	49.6034	59.4116	48.0257	77.967	97.3859	85.8626	81.4492
Bacteria;Proteobacteria;Gammaproteobacteria;Pseudomonadales;Moraxellaceae	458	10993	1147	23941	810	314	851	402	0.680606	14.4142	1.93704	37.5439	1.51244	0.59739	2.71763	0.705325
Bacteria;Proteobacteria;Gammaproteobacteria;Pseudomonadales;Pseudomonadaceae	221	490	19439	2755	316	228	160	8436	0.328415	0.642497	32.8284	4.32035	0.590037	0.433773	0.510954	14.8013
Bacteria;Firmicutes;Bacilli;Lactobacillales;Enterococcaceae	3426	11293	731	725	725	163	2334	58	5.09117	14.8076	1.23451	1.13693	1.35372	0.31011	7.45354	0.101763
Bacteria;Firmicutes;Bacilli;Lactobacillales;Lactobacillaceae	871	5756	144	275	8620	293	230	253	1.29434	7.54737	0.243186	0.431251	16.0953	0.557437	0.734496	0.443899
Bacteria;Firmicutes;Bacilli;Lactobacillales;Aerococcaceae	3345	7036	48	55	58	53	34	62	4.9708	9.22573	0.0810619	0.0862502	0.108298	0.100833	0.108578	0.108781
Bacteria;Firmicutes;Bacilli;Lactobacillales;Carnobacteriaceae	25	237	23	3217	14	4	23	9	0.037151	0.310759	0.0388422	5.04485	0.0261409	0.00761006	0.0734496	0.0157909
Bacteria;Firmicutes;Bacilli;Lactobacillales;Streptococcaceae	37	67	571	5	541	19	16	513	0.0549834	0.0878516	0.964299	0.00784092	1.01016	0.0361478	0.0510954	0.900079
Bacteria;Actinobacteria;Actinobacteria;Micrococcales;Micrococcaceae	6	17	29	766	7	12	17	10	0.00891623	0.0222907	0.0489749	1.20123	0.0130704	0.0228302	0.0542888	0.0175454
Bacteria;Bacteroidetes;Bacteroidia;Bacteroidales;Prevotellaceae	5	51	0	2	4	3	258	0	0.00743019	0.0668721	0	0.00313637	0.00746882	0.00570755	0.823913	0
Bacteria;Firmicutes;Clostridia;Clostridiales;Clostridiaceae_1	8	14	59	193	70	25	4	16	0.0118883	0.018357	0.0996386	0.30266	0.130704	0.0475629	0.0127738	0.0280726
Bacteria;Proteobacteria;Gammaproteobacteria;Aeromonadales;Aeromonadaceae	1	369	33	20	3	6	6	3	0.00148604	0.483839	0.0557301	0.0313637	0.00560161	0.0114151	0.0191608	0.00526362
Bacteria;Tenericutes;Mollicutes;Mycoplasmatales;Mycoplasmataceae	71	85	1	1	100	12	9	2	0.105509	0.111453	0.00168879	0.00156818	0.18672	0.0228302	0.0287411	0.00350908
Bacteria;Actinobacteria;Actinobacteria;Corynebacteriales;Corynebacteriaceae	105	121	1	5	19	13	3	12	0.156034	0.158657	0.00168879	0.00784092	0.0354769	0.0247327	0.00958038	0.0210545
Bacteria;Proteobacteria;Alphaproteobacteria;Rickettsiales;Mitochondria	5	68	8	16	10	0	35	5	0.00743019	0.0891628	0.0135103	0.025091	0.018672	0	0.111771	0.0087727
Bacteria;Proteobacteria;Gammaproteobacteria;Betaproteobacteriales;Burkholderiaceae	8	17	75	34	4	3	1	20	0.0118883	0.0222907	0.126659	0.0533183	0.00746882	0.00570755	0.00319346	0.0350908
Bacteria;Bacteroidetes;Bacteroidia;Bacteroidales;Bacteroidaceae	4	55	3	18	0	1	34	1	0.00594415	0.072117	0.00506637	0.0282273	0	0.00190252	0.108578	0.00175454
Bacteria;Firmicutes;Bacilli;Bacillales;Staphylococcaceae	26	89	3	3	1	4	4	6	0.038637	0.116698	0.00506637	0.00470455	0.0018672	0.00761006	0.0127738	0.0105272
Bacteria;Firmicutes;Bacilli;Lactobacillales;Leuconostocaceae	9	29	2	10	39	18	1	2	0.0133743	0.0380253	0.00337758	0.0156818	0.072821	0.0342453	0.00319346	0.00350908
Bacteria;Firmicutes;Clostridia;Clostridiales;Lachnospiraceae	12	43	5	11	7	5	11	4	0.0178325	0.0563824	0.00844395	0.01725	0.0130704	0.00951258	0.0351281	0.00701816
Bacteria;Bacteroidetes;Bacteroidia;Flavobacteriales;Weeksellaceae	2	87	0	7	1	0	2	1	0.00297208	0.114076	0	0.0109773	0.0018672	0	0.00638692	0.00175454
Bacteria;Firmicutes;Clostridia;Clostridiales;Ruminococcaceae	6	28	0	13	7	0	15	4	0.00891623	0.0367141	0	0.0203864	0.0130704	0	0.0479019	0.00701816
Bacteria;Actinobacteria;Actinobacteria;Actinomycetales;Actinomycetaceae	31	29	1	9	4	5	1	6	0.0460672	0.0380253	0.00168879	0.0141137	0.00746882	0.00951258	0.00319346	0.0105272
Bacteria;Bacteroidetes;Bacteroidia;Cytophagales;Hymenobacteraceae	0	0	0	75	0	0	0	0	0	0	0	0.117614	0	0	0	0
Bacteria;Firmicutes;Negativicutes;Selenomonadales;Veillonellaceae	4	25	0	7	2	1	18	1	0.00594415	0.0327804	0	0.0109773	0.00373441	0.00190252	0.0574823	0.00175454
Bacteria;Proteobacteria;Alphaproteobacteria;Rhizobiales;Rhizobiaceae	7	13	0	39	1	3	2	2	0.0104023	0.0170458	0	0.0611592	0.0018672	0.00570755	0.00638692	0.00350908
Bacteria;Proteobacteria;Alphaproteobacteria;Rhodobacterales;Rhodobacteraceae	8	20	6	19	7	4	1	2	0.0118883	0.0262243	0.0101327	0.0297955	0.0130704	0.00761006	0.00319346	0.00350908
Bacteria;Thermotogae;Thermotogae;Petrotogales;Petrotogaceae	3	41	0	11	1	0	1	1	0.00445812	0.0537599	0	0.01725	0.0018672	0	0.00319346	0.00175454
Bacteria;Bacteroidetes;Bacteroidia;Sphingobacteriales;Sphingobacteriaceae	1	26	1	17	1	0	3	0	0.00148604	0.0340917	0.00168879	0.0266591	0.0018672	0	0.00958038	0
Bacteria;Firmicutes;Clostridia;Clostridiales;Heliobacteriaceae	6	33	1	8	0	0	1	0	0.00891623	0.0432702	0.00168879	0.0125455	0	0	0.00319346	0
Bacteria;Bacteroidetes;Bacteroidia;Bacteroidales;Muribaculaceae	9	12	5	5	0	0	4	3	0.0133743	0.0157346	0.00844395	0.00784092	0	0	0.0127738	0.00526362
Bacteria;Chloroflexi;Anaerolineae;Anaerolineales;Anaerolineaceae	11	5	7	12	2	0	0	0	0.0163464	0.00655609	0.0118215	0.0188182	0.00373441	0	0	0
Bacteria;Bacteroidetes;Bacteroidia;Chitinophagales;Chitinophagaceae	8	20	0	3	4	1	1	1	0.0118883	0.0262243	0	0.00470455	0.00746882	0.00190252	0.00319346	0.00175454
Bacteria;Firmicutes;Erysipelotrichia;Erysipelotrichales;Erysipelotrichaceae	8	9	0	0	0	1	6	0	0.0118883	0.011801	0	0	0	0.00190252	0.0191608	0
Bacteria;Actinobacteria;Actinobacteria;Micrococcales;Microbacteriaceae	2	6	0	5	5	1	0	5	0.00297208	0.0078673	0	0.00784092	0.00933602	0.00190252	0	0.0087727
Bacteria;Deinococcus-Thermus;Deinococci;Deinococcales;Deinococcaceae	1	6	7	2	2	1	0	4	0.00148604	0.0078673	0.0118215	0.00313637	0.00373441	0.00190252	0	0.00701816
Bacteria;Actinobacteria;Actinobacteria;Bifidobacteriales;Bifidobacteriaceae	4	5	1	1	0	0	6	1	0.00594415	0.00655609	0.00168879	0.00156818	0	0	0.0191608	0.00175454
Bacteria;Epsilonbacteraeota;Campylobacteria;Campylobacterales;Helicobacteraceae	2	0	0	1	16	1	0	0	0.00297208	0	0	0.00156818	0.0298753	0.00190252	0	0
Bacteria;Planctomycetes;Planctomycetacia;Pirellulales;Pirellulaceae	0	10	1	5	5	2	0	0	0	0.0131122	0.00168879	0.00784092	0.00933602	0.00380503	0	0
Bacteria;Firmicutes;Clostridia;Clostridiales;Peptostreptococcaceae	1	5	6	5	1	1	0	2	0.00148604	0.00655609	0.0101327	0.00784092	0.0018672	0.00190252	0	0.00350908
Bacteria;Bacteroidetes;Bacteroidia;Bacteroidales;Prolixibacteraceae	13	3	4	2	0	0	0	0	0.0193185	0.00393365	0.00675516	0.00313637	0	0	0	0
Bacteria;Cyanobacteria;Oxyphotobacteria;Nostocales;Phormidiaceae	0	0	0	0	13	0	2	0	0	0	0	0	0.0242737	0	0.00638692	0
Bacteria;Cyanobacteria;Oxyphotobacteria;Nostocales;Chroococcidiopsaceae	0	0	2	0	2	0	6	0	0	0	0.00337758	0	0.00373441	0	0.0191608	0
Bacteria;Proteobacteria;Alphaproteobacteria;Rhizobiales;Xanthobacteraceae	3	7	0	0	0	1	2	2	0.00445812	0.00917852	0	0	0	0.00190252	0.00638692	0.00350908
Bacteria;Proteobacteria;Alphaproteobacteria;Caulobacterales;Caulobacteraceae	1	14	0	1	2	0	0	0	0.00148604	0.018357	0	0.00156818	0.00373441	0	0	0
Bacteria;Verrucomicrobia;Verrucomicrobiae;Verrucomicrobiales;Akkermansiaceae	1	6	3	0	3	1	0	1	0.00148604	0.0078673	0.00506637	0	0.00560161	0.00190252	0	0.00175454
Archaea;Euryarchaeota;Methanomicrobia;Methanosarcinales;Methanosaetaceae	1	3	1	2	0	0	3	0	0.00148604	0.00393365	0.00168879	0.00313637	0	0	0.00958038	0
Bacteria;Firmicutes;Bacilli;Bacillales;Planococcaceae	0	1	4	0	3	1	0	2	0	0.00131122	0.00675516	0	0.00560161	0.00190252	0	0.00350908
Bacteria;Fusobacteria;Fusobacteriia;Fusobacteriales;Fusobacteriaceae	0	0	0	0	1	4	3	0	0	0	0	0	0.0018672	0.00761006	0.00958038	0
Bacteria;Firmicutes;Clostridia;Clostridiales;Family_XI	0	5	1	0	0	0	3	0	0	0.00655609	0.00168879	0	0	0	0.00958038	0
Bacteria;Synergistetes;Synergistia;Synergistales;Synergistaceae	1	11	1	0	0	0	0	0	0.00148604	0.0144234	0.00168879	0	0	0	0	0
Bacteria;Firmicutes;Bacilli;Bacillales;Bacillaceae	3	7	0	2	0	0	0	0	0.00445812	0.00917852	0	0.00313637	0	0	0	0
Bacteria;Actinobacteria;Coriobacteriia;Coriobacteriales;Coriobacteriaceae	0	2	0	0	0	0	4	0	0	0.00262243	0	0	0	0	0.0127738	0
Bacteria;Proteobacteria;Alphaproteobacteria;Rhizobiales;Beijerinckiaceae	1	6	0	0	0	3	0	0	0.00148604	0.0078673	0	0	0	0.00570755	0	0
Bacteria;Actinobacteria;Actinobacteria;Corynebacteriales;Mycobacteriaceae	2	7	0	0	0	1	0	0	0.00297208	0.00917852	0	0	0	0.00190252	0	0
Bacteria;Bacteroidetes;Bacteroidia;Flavobacteriales;Flavobacteriaceae	0	2	0	0	6	0	0	0	0	0.00262243	0	0	0.0112032	0	0	0
Bacteria;Firmicutes;Clostridia;Clostridiales;Caldicoprobacteraceae	0	10	0	0	0	0	0	0	0	0.0131122	0	0	0	0	0	0
Bacteria;Actinobacteria;Actinobacteria;Propionibacteriales;Propionibacteriaceae	4	3	0	0	1	0	0	0	0.00594415	0.00393365	0	0	0.0018672	0	0	0
Bacteria;Bacteroidetes;Bacteroidia;Bacteroidales;Dysgonomonadaceae	3	1	0	0	3	0	0	0	0.00445812	0.00131122	0	0	0.00560161	0	0	0
Bacteria;Firmicutes;Bacilli;Bacillales;Family_XII	0	0	1	6	0	0	0	0	0	0	0.00168879	0.00940911	0	0	0	0
Bacteria;Actinobacteria;Actinobacteria;Micrococcales;Intrasporangiaceae	0	1	0	3	1	0	1	0	0	0.00131122	0	0.00470455	0.0018672	0	0.00319346	0
Bacteria;Actinobacteria;Actinobacteria;Corynebacteriales;Nocardiaceae	0	4	0	0	0	0	0	2	0	0.00524487	0	0	0	0	0	0.00350908
Bacteria;Actinobacteria;Actinobacteria;Pseudonocardiales;Pseudonocardiaceae	1	4	1	0	0	0	0	0	0.00148604	0.00524487	0.00168879	0	0	0	0	0
Bacteria;Proteobacteria;Gammaproteobacteria;Oceanospirillales;Halomonadaceae	3	3	0	0	0	0	0	0	0.00445812	0.00393365	0	0	0	0	0	0
Bacteria;Actinobacteria;Actinobacteria;Micrococcales;Dermabacteraceae	1	1	0	0	1	0	0	2	0.00148604	0.00131122	0	0	0.0018672	0	0	0.00350908
Bacteria;Firmicutes;Clostridia;DTU014;Clostridia_bacterium_DTU014	1	5	0	0	0	0	0	0	0.00148604	0.00655609	0	0	0	0	0	0
Bacteria;Actinobacteria;Thermoleophilia;Solirubrobacterales;Solirubrobacteraceae	0	0	0	5	0	0	0	0	0	0	0	0.00784092	0	0	0	0
Bacteria;Epsilonbacteraeota;Campylobacteria;Campylobacterales;Campylobacteraceae	3	1	0	0	1	0	0	0	0.00445812	0.00131122	0	0	0.0018672	0	0	0
Bacteria;Bacteroidetes;Bacteroidia;Bacteroidales;Tannerellaceae	0	2	0	1	0	0	1	0	0	0.00262243	0	0.00156818	0	0	0.00319346	0
Bacteria;Actinobacteria;Actinobacteria;Frankiales;Geodermatophilaceae	0	0	1	1	0	2	0	0	0	0	0.00168879	0.00156818	0	0.00380503	0	0
Bacteria;Bacteroidetes;Bacteroidia;Bacteroidales;Rikenellaceae	0	4	1	0	0	0	0	0	0	0.00524487	0.00168879	0	0	0	0	0
Bacteria;Cyanobacteria;Oxyphotobacteria;Nostocales;Nostocaceae	0	0	4	0	0	0	0	0	0	0	0.00675516	0	0	0	0	0
Bacteria;Actinobacteria;Coriobacteriia;Coriobacteriales;Atopobiaceae	0	0	0	2	0	0	0	2	0	0	0	0.00313637	0	0	0	0.00350908
Bacteria;Coprothermobacteraeota;Coprothermobacteria;Coprothermobacterales;Coprothermobacteraceae	0	5	0	0	0	0	0	0	0	0.00655609	0	0	0	0	0	0
Bacteria;Firmicutes;Clostridia;Clostridiales;Family_XVIII	0	5	0	0	0	0	0	0	0	0.00655609	0	0	0	0	0	0
Bacteria;Firmicutes;Clostridia;Clostridiales;Family_XIV	0	0	0	0	0	0	2	0	0	0	0	0	0	0	0.00638692	0
Bacteria;Bacteroidetes;Bacteroidia;Bacteroidales;Marinifilaceae	0	0	0	0	0	0	2	0	0	0	0	0	0	0	0.00638692	0
Bacteria;Proteobacteria;Alphaproteobacteria;Rhizobiales;Rhizobiales_Incertae_Sedis	0	2	0	0	2	0	0	0	0	0.00262243	0	0	0.00373441	0	0	0
Bacteria;Actinobacteria;Rubrobacteria;Rubrobacterales;Rubrobacteriaceae	0	1	1	2	0	0	0	0	0	0.00131122	0.00168879	0.00313637	0	0	0	0
Bacteria;Firmicutes;Clostridia;Clostridiales;Syntrophomonadaceae	1	2	0	1	0	0	0	0	0.00148604	0.00262243	0	0.00156818	0	0	0	0
Bacteria;Firmicutes;Limnochordia;Limnochordales;Limnochordaceae	0	3	0	1	0	0	0	0	0	0.00393365	0	0.00156818	0	0	0	0
Bacteria;Firmicutes;Clostridia;Clostridiales;Clostridiales_vadinBB60_group	1	3	0	0	0	0	0	0	0.00148604	0.00393365	0	0	0	0	0	0
Bacteria;Firmicutes;Bacilli;Bacillales;Paenibacillaceae	0	4	0	0	0	0	0	0	0	0.00524487	0	0	0	0	0	0
Bacteria;Firmicutes;Negativicutes;Selenomonadales;Acidaminococcaceae	0	0	0	0	0	1	1	0	0	0	0	0	0	0.00190252	0.00319346	0
Bacteria;Actinobacteria;Actinobacteria;Micrococcales;Beutenbergiaceae	2	0	0	0	0	0	0	1	0.00297208	0	0	0	0	0	0	0.00175454
Archaea;Euryarchaeota;Methanobacteria;Methanobacteriales;Methanobacteriaceae	3	0	0	0	0	0	0	0	0.00445812	0	0	0	0	0	0	0
Bacteria;Proteobacteria;Gammaproteobacteria;Alteromonadales;Shewanellaceae	0	2	0	0	0	0	0	1	0	0.00262243	0	0	0	0	0	0.00175454
Bacteria;Tenericutes;Mollicutes;Haloplasmatales;Haloplasmataceae	1	2	0	0	0	0	0	0	0.00148604	0.00262243	0	0	0	0	0	0
Bacteria;Verrucomicrobia;Verrucomicrobiae;Verrucomicrobiales;Rubritaleaceae	0	0	0	0	0	2	0	0	0	0	0	0	0	0.00380503	0	0
Bacteria;Proteobacteria;Gammaproteobacteria;Competibacterales;Competibacteraceae	0	0	0	0	2	0	0	0	0	0	0	0	0.00373441	0	0	0
Bacteria;Firmicutes;Clostridia;Clostridiales;Peptococcaceae	0	0	0	0	2	0	0	0	0	0	0	0	0.00373441	0	0	0
Bacteria;Proteobacteria;Gammaproteobacteria;Alteromonadales;Pseudoalteromonadaceae	0	0	1	0	1	0	0	0	0	0	0.00168879	0	0.0018672	0	0	0
Bacteria;Proteobacteria;Deltaproteobacteria;Desulfovibrionales;Desulfovibrionaceae	0	0	0	0	0	0	0	2	0	0	0	0	0	0	0	0.00350908
Bacteria;Proteobacteria;Alphaproteobacteria;Acetobacterales;Acetobacteraceae	0	0	2	0	0	0	0	0	0	0	0.00337758	0	0	0	0	0
Bacteria;Proteobacteria;Alphaproteobacteria;Sphingomonadales;Sphingomonadaceae	0	0	2	0	0	0	0	0	0	0	0.00337758	0	0	0	0	0
Bacteria;Bacteroidetes;Bacteroidia;Cytophagales;Spirosomaceae	0	0	2	0	0	0	0	0	0	0	0.00337758	0	0	0	0	0
Bacteria;Cyanobacteria;Oxyphotobacteria;Leptolyngbyales;Leptolyngbyaceae	0	0	0	2	0	0	0	0	0	0	0	0.00313637	0	0	0	0
Bacteria;Actinobacteria;Actinobacteria;Frankiales;Nakamurellaceae	0	1	0	0	0	0	0	1	0	0.00131122	0	0	0	0	0	0.00175454
Bacteria;Bacteroidetes;Bacteroidia;Sphingobacteriales;Lentimicrobiaceae	0	1	1	0	0	0	0	0	0	0.00131122	0.00168879	0	0	0	0	0
Bacteria;Actinobacteria;Actinobacteria;Micrococcales;Bogoriellaceae	2	0	0	0	0	0	0	0	0.00297208	0	0	0	0	0	0	0
Bacteria;Actinobacteria;Actinobacteria;Propionibacteriales;Nocardioidaceae	2	0	0	0	0	0	0	0	0.00297208	0	0	0	0	0	0	0
Bacteria;Proteobacteria;Alphaproteobacteria;Azospirillales;Azospirillaceae	0	1	0	1	0	0	0	0	0	0.00131122	0	0.00156818	0	0	0	0
Bacteria;Bacteroidetes;Bacteroidia;Bacteroidales;Bacteroidetes_vadinHA17	1	1	0	0	0	0	0	0	0.00148604	0.00131122	0	0	0	0	0	0
Bacteria;Atribacteria;Caldatribacteriia;Caldatribacteriales;Caldatribacteriaceae	1	1	0	0	0	0	0	0	0.00148604	0.00131122	0	0	0	0	0	0
Bacteria;Firmicutes;Clostridia;Clostridiales;Clostridiaceae_4	0	2	0	0	0	0	0	0	0	0.00262243	0	0	0	0	0	0
Archaea;Euryarchaeota;Methanobacteria;Methanobacteriales;Methanothermobacteraceae	0	2	0	0	0	0	0	0	0	0.00262243	0	0	0	0	0	0
Bacteria;Actinobacteria;Actinobacteria;Streptosporangiales;Nocardiopsaceae	0	2	0	0	0	0	0	0	0	0.00262243	0	0	0	0	0	0
Bacteria;Chlamydiae;Chlamydiae;Chlamydiales;Parachlamydiaceae	0	2	0	0	0	0	0	0	0	0.00262243	0	0	0	0	0	0
Bacteria;Spirochaetes;Spirochaetia;Spirochaetales;Spirochaetaceae	0	2	0	0	0	0	0	0	0	0.00262243	0	0	0	0	0	0
Bacteria;Proteobacteria;Gammaproteobacteria;Xanthomonadales;Xanthomonadaceae	0	2	0	0	0	0	0	0	0	0.00262243	0	0	0	0	0	0
Bacteria;Proteobacteria;Gammaproteobacteria;Enterobacteriales;Enterobacteriaceae;Escherichia-Shigella	56989	34374	10014	6117	39109	50181	26364	36835	84.6879	45.0718	16.9115	9.59259	73.0245	95.4701	84.1924	64.6285
Bacteria;Proteobacteria;Gammaproteobacteria;Pseudomonadales;Pseudomonadaceae;Pseudomonas	221	490	19439	2755	316	228	160	8436	0.328415	0.642497	32.8284	4.32035	0.590037	0.433773	0.510954	14.8013
Bacteria;Proteobacteria;Gammaproteobacteria;Enterobacteriales;Enterobacteriaceae;Pantoea	390	326	388	23388	1606	399	184	537	0.579555	0.427457	0.65525	36.6767	2.99873	0.759104	0.587597	0.942188
Bacteria;Proteobacteria;Gammaproteobacteria;Pseudomonadales;Moraxellaceae;Psychrobacter	199	182	894	22526	300	226	648	216	0.295722	0.238642	1.50978	35.3249	0.560161	0.429968	2.06936	0.378981
Bacteria;Proteobacteria;Gammaproteobacteria;Enterobacteriales;Enterobacteriaceae;Lelliottia	265	1803	14654	469	438	303	182	5113	0.3938	2.36413	24.7475	0.735479	0.817836	0.576462	0.58121	8.97096
Bacteria;Firmicutes;Bacilli;Lactobacillales;Enterococcaceae;Catellicoccus	3402	11177	722	712	723	162	2330	56	5.0555	14.6555	1.21931	1.11655	1.34999	0.308207	7.44076	0.0982542
Bacteria;Firmicutes;Bacilli;Lactobacillales;Lactobacillaceae;Lactobacillus	871	5756	144	275	8620	293	230	253	1.29434	7.54737	0.243186	0.431251	16.0953	0.557437	0.734496	0.443899
Bacteria;Proteobacteria;Gammaproteobacteria;Enterobacteriales;Enterobacteriaceae;Hafnia-Obesumbacterium	136	215	9176	161	123	114	72	2171	0.202101	0.281912	15.4963	0.252478	0.229666	0.216887	0.229929	3.80911
Bacteria;Proteobacteria;Gammaproteobacteria;Pseudomonadales;Moraxellaceae;Acinetobacter	258	10810	250	1299	508	86	196	186	0.383398	14.1743	0.422197	2.03707	0.94854	0.163616	0.625918	0.326344
Bacteria;Firmicutes;Bacilli;Lactobacillales;Aerococcaceae;Aerococcus	3343	7036	48	55	58	53	33	62	4.96783	9.22573	0.0810619	0.0862502	0.108298	0.100833	0.105384	0.108781
Bacteria;Firmicutes;Bacilli;Lactobacillales;Carnobacteriaceae;Carnobacterium	17	19	21	3214	12	4	21	9	0.0252627	0.0249131	0.0354646	5.04015	0.0224065	0.00761006	0.0670627	0.0157909
Bacteria;Proteobacteria;Gammaproteobacteria;Enterobacteriales;Enterobacteriaceae;Raoultella	56	252	242	118	37	21	9	823	0.0832182	0.330427	0.408687	0.185046	0.0690866	0.0399528	0.0287411	1.44399
Bacteria;Firmicutes;Bacilli;Lactobacillales;Streptococcaceae;Lactococcus	5	24	565	1	7	7	6	500	0.00743019	0.0314692	0.954166	0.00156818	0.0130704	0.0133176	0.0191608	0.87727
Bacteria;Firmicutes;Bacilli;Lactobacillales;Streptococcaceae;Streptococcus	32	43	6	4	533	11	10	13	0.0475532	0.0563824	0.0101327	0.00627274	0.99522	0.0209277	0.0319346	0.022809
Bacteria;Actinobacteria;Actinobacteria;Micrococcales;Micrococcaceae;Kocuria	5	8	17	637	3	12	15	10	0.00743019	0.0104897	0.0287094	0.998934	0.00560161	0.0228302	0.0479019	0.0175454
Bacteria;Bacteroidetes;Bacteroidia;Bacteroidales;Prevotellaceae;Prevotella_9	5	42	0	2	1	2	242	0	0.00743019	0.0550711	0	0.00313637	0.0018672	0.00380503	0.772817	0
Bacteria;Proteobacteria;Gammaproteobacteria;Aeromonadales;Aeromonadaceae;Aeromonas	1	369	33	20	3	6	6	3	0.00148604	0.483839	0.0557301	0.0313637	0.00560161	0.0114151	0.0191608	0.00526362
Bacteria;Firmicutes;Clostridia;Clostridiales;Clostridiaceae_1;Candidatus_Arthromitus	8	13	6	189	66	21	4	14	0.0118883	0.0170458	0.0101327	0.296387	0.123235	0.0399528	0.0127738	0.0245636
Bacteria;Firmicutes;Bacilli;Lactobacillales;Carnobacteriaceae;Trichococcus	8	218	2	3	2	0	2	0	0.0118883	0.285845	0.00337758	0.00470455	0.00373441	0	0.00638692	0
Bacteria;Actinobacteria;Actinobacteria;Micrococcales;Micrococcaceae;Arthrobacter	1	1	12	125	3	0	1	0	0.00148604	0.00131122	0.0202655	0.196023	0.00560161	0	0.00319346	0
Bacteria;Bacteroidetes;Bacteroidia;Bacteroidales;Bacteroidaceae;Bacteroides	4	55	3	18	0	1	34	1	0.00594415	0.072117	0.00506637	0.0282273	0	0.00190252	0.108578	0.00175454
Bacteria;Firmicutes;Bacilli;Lactobacillales;Enterococcaceae;Enterococcus	23	109	9	10	2	1	2	2	0.0341789	0.142923	0.0151991	0.0156818	0.00373441	0.00190252	0.00638692	0.00350908
Bacteria;Firmicutes;Bacilli;Bacillales;Staphylococcaceae;Staphylococcus	26	89	3	3	1	4	4	6	0.038637	0.116698	0.00506637	0.00470455	0.0018672	0.00761006	0.0127738	0.0105272
Bacteria;Proteobacteria;Gammaproteobacteria;Betaproteobacteriales;Burkholderiaceae;Comamonas	3	12	69	0	0	3	0	17	0.00445812	0.0157346	0.116526	0	0	0.00570755	0	0.0298272
Bacteria;Proteobacteria;Gammaproteobacteria;Enterobacteriales;Enterobacteriaceae;Plesiomonas	1	48	0	2	5	2	26	3	0.00148604	0.0629384	0	0.00313637	0.00933602	0.00380503	0.08303	0.00526362
Bacteria;Firmicutes;Bacilli;Lactobacillales;Leuconostocaceae;Leuconostoc	7	21	0	7	38	15	1	2	0.0104023	0.0275356	0	0.0109773	0.0709538	0.0285377	0.00319346	0.00350908
Bacteria;Proteobacteria;Gammaproteobacteria;Enterobacteriales;Enterobacteriaceae;Serratia	1	0	1	0	61	0	1	12	0.00148604	0	0.00168879	0	0.113899	0	0.00319346	0.0210545
Bacteria;Bacteroidetes;Bacteroidia;Flavobacteriales;Weeksellaceae;Chryseobacterium	2	87	0	7	1	0	2	1	0.00297208	0.114076	0	0.0109773	0.0018672	0	0.00638692	0.00175454
Bacteria;Bacteroidetes;Bacteroidia;Cytophagales;Hymenobacteraceae;Hymenobacter	0	0	0	75	0	0	0	0	0	0	0	0.117614	0	0	0	0
Bacteria;Actinobacteria;Actinobacteria;Actinomycetales;Actinomycetaceae;Varibaculum	26	27	0	9	4	5	1	0	0.038637	0.0354029	0	0.0141137	0.00746882	0.00951258	0.00319346	0
Bacteria;Firmicutes;Clostridia;Clostridiales;Clostridiaceae_1;Clostridium_sensu_stricto_1	0	0	51	4	3	3	0	2	0	0	0.0861283	0.00627274	0.00560161	0.00570755	0	0.00350908
Bacteria;Proteobacteria;Alphaproteobacteria;Rhodobacterales;Rhodobacteraceae;Paracoccus	7	16	4	19	5	2	1	2	0.0104023	0.0209795	0.00675516	0.0297955	0.00933602	0.00380503	0.00319346	0.00350908
Bacteria;Thermotogae;Thermotogae;Petrotogales;Petrotogaceae;Defluviitoga	3	41	0	11	1	0	1	1	0.00445812	0.0537599	0	0.01725	0.0018672	0	0.00319346	0.00175454
Bacteria;Firmicutes;Clostridia;Clostridiales;Ruminococcaceae;Faecalibacterium	0	12	0	12	2	0	11	4	0	0.0157346	0	0.0188182	0.00373441	0	0.0351281	0.00701816
Bacteria;Proteobacteria;Gammaproteobacteria;Betaproteobacteriales;Burkholderiaceae;Massilia	0	5	6	34	0	0	0	2	0	0.00655609	0.0101327	0.0533183	0	0	0	0.00350908
Bacteria;Firmicutes;Negativicutes;Selenomonadales;Veillonellaceae;Megamonas	2	13	0	1	0	0	16	0	0.00297208	0.0170458	0	0.00156818	0	0	0.0510954	0
Bacteria;Firmicutes;Clostridia;Clostridiales;Heliobacteriaceae;Hydrogenispora	6	33	1	8	0	0	1	0	0.00891623	0.0432702	0.00168879	0.0125455	0	0	0.00319346	0
Bacteria;Actinobacteria;Actinobacteria;Corynebacteriales;Corynebacteriaceae;Corynebacterium	2	34	0	0	3	4	0	0	0.00297208	0.0445814	0	0	0.00560161	0.00761006	0	0
Bacteria;Bacteroidetes;Bacteroidia;Sphingobacteriales;Sphingobacteriaceae;Sphingobacterium	1	26	1	5	1	0	3	0	0.00148604	0.0340917	0.00168879	0.00784092	0.0018672	0	0.00958038	0
Bacteria;Bacteroidetes;Bacteroidia;Chitinophagales;Chitinophagaceae;Sediminibacterium	8	20	0	3	2	1	1	1	0.0118883	0.0262243	0	0.00470455	0.00373441	0.00190252	0.00319346	0.00175454
Bacteria;Actinobacteria;Actinobacteria;Corynebacteriales;Corynebacteriaceae;Corynebacterium_1	4	11	0	1	3	3	1	8	0.00594415	0.0144234	0	0.00156818	0.00560161	0.00570755	0.00319346	0.0140363
Bacteria;Bacteroidetes;Bacteroidia;Bacteroidales;Prevotellaceae;Prevotella_2	0	1	0	0	1	1	12	0	0	0.00131122	0	0	0.0018672	0.00190252	0.0383215	0
Bacteria;Deinococcus-Thermus;Deinococci;Deinococcales;Deinococcaceae;Deinococcus	1	6	7	2	2	1	0	4	0.00148604	0.0078673	0.0118215	0.00313637	0.00373441	0.00190252	0	0.00701816
Bacteria;Actinobacteria;Actinobacteria;Bifidobacteriales;Bifidobacteriaceae;Bifidobacterium	4	5	1	1	0	0	6	1	0.00594415	0.00655609	0.00168879	0.00156818	0	0	0.0191608	0.00175454
Bacteria;Epsilonbacteraeota;Campylobacteria;Campylobacterales;Helicobacteraceae;Helicobacter	2	0	0	1	16	1	0	0	0.00297208	0	0	0.00156818	0.0298753	0.00190252	0	0
Bacteria;Firmicutes;Negativicutes;Selenomonadales;Veillonellaceae;Veillonella	2	7	0	6	2	1	2	0	0.00297208	0.00917852	0	0.00940911	0.00373441	0.00190252	0.00638692	0
Bacteria;Firmicutes;Bacilli;Lactobacillales;Leuconostocaceae;Weissella	2	8	2	3	1	3	0	0	0.00297208	0.0104897	0.00337758	0.00470455	0.0018672	0.00570755	0	0
Bacteria;Cyanobacteria;Oxyphotobacteria;Nostocales;Chroococcidiopsaceae;Aliterella_CENA595	0	0	2	0	2	0	6	0	0	0	0.00337758	0	0.00373441	0	0.0191608	0
Bacteria;Proteobacteria;Alphaproteobacteria;Rhizobiales;Xanthobacteraceae;Bradyrhizobium	3	7	0	0	0	1	2	2	0.00445812	0.00917852	0	0	0	0.00190252	0.00638692	0.00350908
Bacteria;Firmicutes;Clostridia;Clostridiales;Lachnospiraceae;Blautia	6	1	3	2	2	0	1	0	0.00891623	0.00131122	0.00506637	0.00313637	0.00373441	0	0.00319346	0
Bacteria;Firmicutes;Erysipelotrichia;Erysipelotrichales;Erysipelotrichaceae;Dubosiella	5	7	0	0	0	1	2	0	0.00743019	0.00917852	0	0	0	0.00190252	0.00638692	0
Bacteria;Verrucomicrobia;Verrucomicrobiae;Verrucomicrobiales;Akkermansiaceae;Akkermansia	1	6	3	0	3	1	0	1	0.00148604	0.0078673	0.00506637	0	0.00560161	0.00190252	0	0.00175454
Bacteria;Proteobacteria;Alphaproteobacteria;Rhizobiales;Rhizobiaceae;Allorhizobium-Neorhizobium-Pararhizobium-Rhizobium	5	12	0	0	0	0	0	0	0.00743019	0.0157346	0	0	0	0	0	0
Bacteria;Firmicutes;Clostridia;Clostridiales;Peptostreptococcaceae;Romboutsia	0	5	5	4	0	0	0	1	0	0.00655609	0.00844395	0.00627274	0	0	0	0.00175454
Archaea;Euryarchaeota;Methanomicrobia;Methanosarcinales;Methanosaetaceae;Methanosaeta	1	3	1	2	0	0	3	0	0.00148604	0.00393365	0.00168879	0.00313637	0	0	0.00958038	0
Bacteria;Fusobacteria;Fusobacteriia;Fusobacteriales;Fusobacteriaceae;Fusobacterium	0	0	0	0	1	4	3	0	0	0	0	0	0.0018672	0.00761006	0.00958038	0
Bacteria;Bacteroidetes;Bacteroidia;Sphingobacteriales;Sphingobacteriaceae;Pedobacter	0	0	0	12	0	0	0	0	0	0	0	0.0188182	0	0	0	0
Bacteria;Proteobacteria;Gammaproteobacteria;Betaproteobacteriales;Burkholderiaceae;Ralstonia	5	0	0	0	3	0	1	0	0.00743019	0	0	0	0.00560161	0	0.00319346	0
Bacteria;Proteobacteria;Alphaproteobacteria;Caulobacterales;Caulobacteraceae;Brevundimonas	0	11	0	1	0	0	0	0	0	0.0144234	0	0.00156818	0	0	0	0
Bacteria;Actinobacteria;Actinobacteria;Micrococcales;Microbacteriaceae;Microbacterium	2	1	0	4	1	0	0	2	0.00297208	0.00131122	0	0.00627274	0.0018672	0	0	0.00350908
Bacteria;Proteobacteria;Gammaproteobacteria;Enterobacteriales;Enterobacteriaceae;Morganella	0	0	2	0	0	0	0	7	0	0	0.00337758	0	0	0	0	0.0122818
Bacteria;Actinobacteria;Actinobacteria;Micrococcales;Micrococcaceae;Rothia	0	8	0	0	1	0	1	0	0	0.0104897	0	0	0.0018672	0	0.00319346	0
Bacteria;Actinobacteria;Coriobacteriia;Coriobacteriales;Coriobacteriaceae;Collinsella	0	2	0	0	0	0	4	0	0	0.00262243	0	0	0	0	0.0127738	0
Bacteria;Firmicutes;Clostridia;Clostridiales;Lachnospiraceae;Tyzzerella_3	0	4	1	0	1	1	0	2	0	0.00524487	0.00168879	0	0.0018672	0.00190252	0	0.00350908
Bacteria;Planctomycetes;Planctomycetacia;Pirellulales;Pirellulaceae;Pir4_lineage	0	4	1	1	1	2	0	0	0	0.00524487	0.00168879	0.00156818	0.0018672	0.00380503	0	0
Bacteria;Actinobacteria;Actinobacteria;Corynebacteriales;Mycobacteriaceae;Mycobacterium	2	7	0	0	0	1	0	0	0.00297208	0.00917852	0	0	0	0.00190252	0	0
Bacteria;Tenericutes;Mollicutes;Mycoplasmatales;Mycoplasmataceae;Ureaplasma	3	7	0	0	0	0	0	0	0.00445812	0.00917852	0	0	0	0	0	0
Bacteria;Firmicutes;Clostridia;Clostridiales;Caldicoprobacteraceae;Caldicoprobacter	0	10	0	0	0	0	0	0	0	0.0131122	0	0	0	0	0	0
Bacteria;Firmicutes;Erysipelotrichia;Erysipelotrichales;Erysipelotrichaceae;Erysipelotrichaceae_UCG-003	0	0	0	0	0	0	4	0	0	0	0	0	0	0	0.0127738	0
Bacteria;Firmicutes;Bacilli;Bacillales;Planococcaceae;Kurthia	0	0	4	0	1	0	0	2	0	0	0.00675516	0	0.0018672	0	0	0.00350908
Bacteria;Actinobacteria;Actinobacteria;Actinomycetales;Actinomycetaceae;Actinomyces	5	2	1	0	0	0	0	0	0.00743019	0.00262243	0.00168879	0	0	0	0	0
Bacteria;Firmicutes;Bacilli;Bacillales;Bacillaceae;Bacillus	2	4	0	2	0	0	0	0	0.00297208	0.00524487	0	0.00313637	0	0	0	0
Bacteria;Bacteroidetes;Bacteroidia;Flavobacteriales;Flavobacteriaceae;Myroides	0	0	0	0	6	0	0	0	0	0	0	0	0.0112032	0	0	0
Bacteria;Firmicutes;Bacilli;Bacillales;Family_XII;Exiguobacterium	0	0	1	6	0	0	0	0	0	0	0.00168879	0.00940911	0	0	0	0
Bacteria;Actinobacteria;Actinobacteria;Micrococcales;Intrasporangiaceae;Arsenicicoccus	0	1	0	3	1	0	1	0	0	0.00131122	0	0.00470455	0.0018672	0	0.00319346	0
Bacteria;Synergistetes;Synergistia;Synergistales;Synergistaceae;Acetomicrobium	0	8	0	0	0	0	0	0	0	0.0104897	0	0	0	0	0	0
Bacteria;Tenericutes;Mollicutes;Mycoplasmatales;Mycoplasmataceae;Mycoplasma	1	1	1	0	1	2	0	0	0.00148604	0.00131122	0.00168879	0	0.0018672	0.00380503	0	0
Bacteria;Firmicutes;Clostridia;Clostridiales;Lachnospiraceae;Herbinix	3	4	0	0	0	0	0	0	0.00445812	0.00524487	0	0	0	0	0	0
Bacteria;Firmicutes;Clostridia;Clostridiales;Family_XI;Gottschalkia	0	0	0	0	0	0	3	0	0	0	0	0	0	0	0.00958038	0
Bacteria;Actinobacteria;Actinobacteria;Micrococcales;Microbacteriaceae;Gulosibacter	0	3	0	1	2	0	0	0	0	0.00393365	0	0.00156818	0.00373441	0	0	0
Bacteria;Actinobacteria;Actinobacteria;Pseudonocardiales;Pseudonocardiaceae;Prauserella	1	4	1	0	0	0	0	0	0.00148604	0.00524487	0.00168879	0	0	0	0	0
Bacteria;Proteobacteria;Gammaproteobacteria;Oceanospirillales;Halomonadaceae;Halomonas	3	3	0	0	0	0	0	0	0.00445812	0.00393365	0	0	0	0	0	0
Bacteria;Firmicutes;Clostridia;Clostridiales;Family_XI;Tepidimicrobium	0	5	1	0	0	0	0	0	0	0.00655609	0.00168879	0	0	0	0	0
Bacteria;Actinobacteria;Actinobacteria;Micrococcales;Dermabacteraceae;Brachybacterium	1	1	0	0	1	0	0	2	0.00148604	0.00131122	0	0	0.0018672	0	0	0.00350908
Bacteria;Proteobacteria;Alphaproteobacteria;Rhodobacterales;Rhodobacteraceae;Pseudorhodobacter	1	2	0	0	0	2	0	0	0.00148604	0.00262243	0	0	0	0.00380503	0	0
Bacteria;Firmicutes;Clostridia;Clostridiales;Lachnospiraceae;Coprococcus_2	1	0	0	0	0	0	2	0	0.00148604	0	0	0	0	0	0.00638692	0
Bacteria;Firmicutes;Clostridia;Clostridiales;Lachnospiraceae;Lachnospiraceae_NK4A136_group	0	6	0	0	0	0	0	0	0	0.0078673	0	0	0	0	0	0
Bacteria;Proteobacteria;Gammaproteobacteria;Pseudomonadales;Moraxellaceae;Enhydrobacter	0	0	0	5	0	0	0	0	0	0	0	0.00784092	0	0	0	0
Bacteria;Actinobacteria;Thermoleophilia;Solirubrobacterales;Solirubrobacteraceae;Patulibacter	0	0	0	5	0	0	0	0	0	0	0	0.00784092	0	0	0	0
Bacteria;Epsilonbacteraeota;Campylobacteria;Campylobacterales;Campylobacteraceae;Campylobacter	3	1	0	0	1	0	0	0	0.00445812	0.00131122	0	0	0.0018672	0	0	0
Bacteria;Bacteroidetes;Bacteroidia;Bacteroidales;Tannerellaceae;Parabacteroides	0	2	0	1	0	0	1	0	0	0.00262243	0	0.00156818	0	0	0.00319346	0
Bacteria;Actinobacteria;Actinobacteria;Micrococcales;Microbacteriaceae;Leucobacter	0	0	0	0	0	1	0	3	0	0	0	0	0	0.00190252	0	0.00526362
Bacteria;Firmicutes;Erysipelotrichia;Erysipelotrichales;Erysipelotrichaceae;Turicibacter	3	2	0	0	0	0	0	0	0.00445812	0.00262243	0	0	0	0	0	0
Bacteria;Actinobacteria;Actinobacteria;Frankiales;Geodermatophilaceae;Blastococcus	0	0	1	1	0	2	0	0	0	0	0.00168879	0.00156818	0	0.00380503	0	0
Bacteria;Firmicutes;Clostridia;Clostridiales;Ruminococcaceae;Ruminococcus_2	1	3	0	1	0	0	0	0	0.00148604	0.00393365	0	0.00156818	0	0	0	0
Bacteria;Firmicutes;Bacilli;Bacillales;Planococcaceae;Solibacillus	0	1	0	0	2	1	0	0	0	0.00131122	0	0	0.00373441	0.00190252	0	0
Bacteria;Bacteroidetes;Bacteroidia;Bacteroidales;Rikenellaceae;Alistipes	0	4	1	0	0	0	0	0	0	0.00524487	0.00168879	0	0	0	0	0
Bacteria;Bacteroidetes;Bacteroidia;Bacteroidales;Dysgonomonadaceae;Fermentimonas	0	1	0	0	3	0	0	0	0	0.00131122	0	0	0.00560161	0	0	0
Bacteria;Actinobacteria;Actinobacteria;Propionibacteriales;Propionibacteriaceae;Cutibacterium	2	3	0	0	0	0	0	0	0.00297208	0.00393365	0	0	0	0	0	0
Bacteria;Firmicutes;Clostridia;Clostridiales;Peptostreptococcaceae;Peptoclostridium	1	0	1	0	0	1	0	1	0.00148604	0	0.00168879	0	0	0.00190252	0	0.00175454
Bacteria;Coprothermobacteraeota;Coprothermobacteria;Coprothermobacterales;Coprothermobacteraceae;Coprothermobacter	0	5	0	0	0	0	0	0	0	0.00655609	0	0	0	0	0	0
Bacteria;Firmicutes;Clostridia;Clostridiales;Family_XVIII;Symbiobacterium	0	5	0	0	0	0	0	0	0	0.00655609	0	0	0	0	0	0
Bacteria;Bacteroidetes;Bacteroidia;Bacteroidales;Marinifilaceae;Butyricimonas	0	0	0	0	0	0	2	0	0	0	0	0	0	0	0.00638692	0
Bacteria;Firmicutes;Clostridia;Clostridiales;Lachnospiraceae;Eubacterium_eligens_group	0	0	0	0	0	0	2	0	0	0	0	0	0	0	0.00638692	0
Bacteria;Firmicutes;Clostridia;Clostridiales;Ruminococcaceae;Ruminococcaceae_UCG-005	0	0	0	0	0	0	2	0	0	0	0	0	0	0	0.00638692	0
Bacteria;Cyanobacteria;Oxyphotobacteria;Nostocales;Phormidiaceae;Tychonema_CCAP_1459-11B	0	0	0	0	0	0	2	0	0	0	0	0	0	0	0.00638692	0
Bacteria;Bacteroidetes;Bacteroidia;Bacteroidales;Prevotellaceae;Alloprevotella	0	2	0	0	2	0	0	0	0	0.00262243	0	0	0.00373441	0	0	0
Bacteria;Actinobacteria;Rubrobacteria;Rubrobacterales;Rubrobacteriaceae;Rubrobacter	0	1	1	2	0	0	0	0	0	0.00131122	0.00168879	0.00313637	0	0	0	0
Bacteria;Firmicutes;Clostridia;Clostridiales;Lachnospiraceae;Ruminococcus_torques_group	0	2	0	0	0	0	1	0	0	0.00262243	0	0	0	0	0.00319346	0
Bacteria;Firmicutes;Clostridia;Clostridiales;Ruminococcaceae;Subdoligranulum	0	2	0	0	0	0	1	0	0	0.00262243	0	0	0	0	0.00319346	0
Bacteria;Firmicutes;Clostridia;Clostridiales;Syntrophomonadaceae;Syntrophomonas	1	2	0	1	0	0	0	0	0.00148604	0.00262243	0	0.00156818	0	0	0	0
Bacteria;Firmicutes;Clostridia;Clostridiales;Ruminococcaceae;GCA-900066225	0	0	0	0	3	0	0	0	0	0	0	0	0.00560161	0	0	0
Bacteria;Firmicutes;Clostridia;Clostridiales;Ruminococcaceae;Ercella	1	3	0	0	0	0	0	0	0.00148604	0.00393365	0	0	0	0	0	0
Bacteria;Proteobacteria;Alphaproteobacteria;Rhizobiales;Beijerinckiaceae;Methylobacterium	1	3	0	0	0	0	0	0	0.00148604	0.00393365	0	0	0	0	0	0
Bacteria;Actinobacteria;Actinobacteria;Corynebacteriales;Nocardiaceae;Rhodococcus	0	4	0	0	0	0	0	0	0	0.00524487	0	0	0	0	0	0
Bacteria;Firmicutes;Clostridia;Clostridiales;Ruminococcaceae;Ruminococcaceae_UCG-013	0	4	0	0	0	0	0	0	0	0.00524487	0	0	0	0	0	0
Bacteria;Firmicutes;Negativicutes;Selenomonadales;Acidaminococcaceae;Phascolarctobacterium	0	0	0	0	0	1	1	0	0	0	0	0	0	0.00190252	0.00319346	0
Bacteria;Actinobacteria;Actinobacteria;Micrococcales;Beutenbergiaceae;Salana	2	0	0	0	0	0	0	1	0.00297208	0	0	0	0	0	0	0.00175454
Bacteria;Planctomycetes;Planctomycetacia;Pirellulales;Pirellulaceae;Rhodopirellula	0	0	0	3	0	0	0	0	0	0	0	0.00470455	0	0	0	0
Bacteria;Firmicutes;Clostridia;Clostridiales;Clostridiaceae_1;Clostridium_sensu_stricto_3	0	1	2	0	0	0	0	0	0	0.00131122	0.00337758	0	0	0	0	0
Bacteria;Firmicutes;Clostridia;Clostridiales;Lachnospiraceae;A2	0	1	1	1	0	0	0	0	0	0.00131122	0.00168879	0.00156818	0	0	0	0
Bacteria;Firmicutes;Clostridia;Clostridiales;Lachnospiraceae;Lachnospiraceae_UCG-004	0	1	0	0	0	0	1	0	0	0.00131122	0	0	0	0	0.00319346	0
Bacteria;Firmicutes;Clostridia;Clostridiales;Ruminococcaceae;UBA1819	0	1	0	0	0	0	1	0	0	0.00131122	0	0	0	0	0.00319346	0
Archaea;Euryarchaeota;Methanobacteria;Methanobacteriales;Methanobacteriaceae;Methanobrevibacter	3	0	0	0	0	0	0	0	0.00445812	0	0	0	0	0	0	0
Bacteria;Bacteroidetes;Bacteroidia;Bacteroidales;Dysgonomonadaceae;Proteiniphilum	3	0	0	0	0	0	0	0	0.00445812	0	0	0	0	0	0	0
Bacteria;Firmicutes;Negativicutes;Selenomonadales;Veillonellaceae;Anaerovibrio	0	2	0	0	0	0	0	1	0	0.00262243	0	0	0	0	0	0.00175454
Bacteria;Proteobacteria;Gammaproteobacteria;Alteromonadales;Shewanellaceae;Shewanella	0	2	0	0	0	0	0	1	0	0.00262243	0	0	0	0	0	0.00175454
Bacteria;Tenericutes;Mollicutes;Haloplasmatales;Haloplasmataceae;Haloplasma	1	2	0	0	0	0	0	0	0.00148604	0.00262243	0	0	0	0	0	0
Bacteria;Proteobacteria;Alphaproteobacteria;Rhizobiales;Beijerinckiaceae;Microvirga	0	3	0	0	0	0	0	0	0	0.00393365	0	0	0	0	0	0
Bacteria;Firmicutes;Negativicutes;Selenomonadales;Veillonellaceae;Mitsuokella	0	3	0	0	0	0	0	0	0	0.00393365	0	0	0	0	0	0
Bacteria;Bacteroidetes;Bacteroidia;Bacteroidales;Prevotellaceae;Prevotella	0	3	0	0	0	0	0	0	0	0.00393365	0	0	0	0	0	0
Bacteria;Bacteroidetes;Bacteroidia;Bacteroidales;Prevotellaceae;Prevotella_1	0	3	0	0	0	0	0	0	0	0.00393365	0	0	0	0	0	0
Bacteria;Firmicutes;Clostridia;Clostridiales;Ruminococcaceae;Ruminococcaceae_UCG-010	0	3	0	0	0	0	0	0	0	0.00393365	0	0	0	0	0	0
Bacteria;Verrucomicrobia;Verrucomicrobiae;Verrucomicrobiales;Rubritaleaceae;Luteolibacter	0	0	0	0	0	2	0	0	0	0	0	0	0	0.00380503	0	0
Bacteria;Proteobacteria;Gammaproteobacteria;Competibacterales;Competibacteraceae;Candidatus_Competibacter	0	0	0	0	2	0	0	0	0	0	0	0	0.00373441	0	0	0
Bacteria;Firmicutes;Clostridia;Clostridiales;Peptococcaceae;Candidatus_Dichloromethanomonas	0	0	0	0	2	0	0	0	0	0	0	0	0.00373441	0	0	0
Bacteria;Bacteroidetes;Bacteroidia;Chitinophagales;Chitinophagaceae;Cnuella	0	0	0	0	2	0	0	0	0	0	0	0	0.00373441	0	0	0
Bacteria;Chloroflexi;Anaerolineae;Anaerolineales;Anaerolineaceae;RBG-16-58-14	0	0	0	0	2	0	0	0	0	0	0	0	0.00373441	0	0	0
Bacteria;Firmicutes;Clostridia;Clostridiales;Ruminococcaceae;Ruminiclostridium_5	0	0	0	0	2	0	0	0	0	0	0	0	0.00373441	0	0	0
Bacteria;Proteobacteria;Gammaproteobacteria;Betaproteobacteriales;Burkholderiaceae;Burkholderia-Caballeronia-Paraburkholderia	0	0	0	0	1	0	0	1	0	0	0	0	0.0018672	0	0	0.00175454
Bacteria;Proteobacteria;Gammaproteobacteria;Alteromonadales;Pseudoalteromonadaceae;Pseudoalteromonas	0	0	1	0	1	0	0	0	0	0	0.00168879	0	0.0018672	0	0	0
Bacteria;Proteobacteria;Alphaproteobacteria;Rickettsiales;Mitochondria;Triticum_aestivum_bread_wheat	0	0	1	0	1	0	0	0	0	0	0.00168879	0	0.0018672	0	0	0
Bacteria;Actinobacteria;Coriobacteriia;Coriobacteriales;Atopobiaceae;Atopobium	0	0	0	0	0	0	0	2	0	0	0	0	0	0	0	0.00350908
Bacteria;Proteobacteria;Deltaproteobacteria;Desulfovibrionales;Desulfovibrionaceae;Desulfovibrio	0	0	0	0	0	0	0	2	0	0	0	0	0	0	0	0.00350908
Bacteria;Actinobacteria;Actinobacteria;Corynebacteriales;Nocardiaceae;Nocardia	0	0	0	0	0	0	0	2	0	0	0	0	0	0	0	0.00350908
Bacteria;Firmicutes;Clostridia;Clostridiales;Peptostreptococcaceae;Peptostreptococcus	0	0	0	1	1	0	0	0	0	0	0	0.00156818	0.0018672	0	0	0
Bacteria;Cyanobacteria;Oxyphotobacteria;Nostocales;Nostocaceae;Calothrix_PCC-6303	0	0	2	0	0	0	0	0	0	0	0.00337758	0	0	0	0	0
Bacteria;Proteobacteria;Alphaproteobacteria;Acetobacterales;Acetobacteraceae;Roseomonas	0	0	2	0	0	0	0	0	0	0	0.00337758	0	0	0	0	0
Bacteria;Proteobacteria;Alphaproteobacteria;Rhodobacterales;Rhodobacteraceae;Rubellimicrobium	0	0	2	0	0	0	0	0	0	0	0.00337758	0	0	0	0	0
Bacteria;Proteobacteria;Alphaproteobacteria;Sphingomonadales;Sphingomonadaceae;Sphingomonas	0	0	2	0	0	0	0	0	0	0	0.00337758	0	0	0	0	0
Bacteria;Bacteroidetes;Bacteroidia;Cytophagales;Spirosomaceae;Spirosoma	0	0	2	0	0	0	0	0	0	0	0.00337758	0	0	0	0	0
Bacteria;Chloroflexi;Anaerolineae;Anaerolineales;Anaerolineaceae;Pelolinea	0	0	1	1	0	0	0	0	0	0	0.00168879	0.00156818	0	0	0	0
Bacteria;Firmicutes;Clostridia;Clostridiales;Lachnospiraceae;Eubacterium_ruminantium_group	0	0	0	2	0	0	0	0	0	0	0	0.00313637	0	0	0	0
Bacteria;Cyanobacteria;Oxyphotobacteria;Leptolyngbyales;Leptolyngbyaceae;Leptolyngbya_PCC-6306	0	0	0	2	0	0	0	0	0	0	0	0.00313637	0	0	0	0
Bacteria;Actinobacteria;Coriobacteriia;Coriobacteriales;Atopobiaceae;Olsenella	0	0	0	2	0	0	0	0	0	0	0	0.00313637	0	0	0	0
Bacteria;Firmicutes;Clostridia;Clostridiales;Lachnospiraceae;Roseburia	0	0	0	2	0	0	0	0	0	0	0	0.00313637	0	0	0	0
Bacteria;Actinobacteria;Actinobacteria;Frankiales;Nakamurellaceae;Nakamurella	0	1	0	0	0	0	0	1	0	0.00131122	0	0	0	0	0	0.00175454
Bacteria;Firmicutes;Clostridia;Clostridiales;Lachnospiraceae;Acetitomaculum	1	0	0	1	0	0	0	0	0.00148604	0	0	0.00156818	0	0	0	0
Bacteria;Actinobacteria;Actinobacteria;Micrococcales;Bogoriellaceae;Georgenia	2	0	0	0	0	0	0	0	0.00297208	0	0	0	0	0	0	0
Bacteria;Actinobacteria;Actinobacteria;Propionibacteriales;Nocardioidaceae;Nocardioides	2	0	0	0	0	0	0	0	0.00297208	0	0	0	0	0	0	0
Bacteria;Firmicutes;Clostridia;Clostridiales;Ruminococcaceae;Ruminiclostridium_9	2	0	0	0	0	0	0	0	0.00297208	0	0	0	0	0	0	0
Bacteria;Firmicutes;Clostridia;Clostridiales;Ruminococcaceae;Ruminococcaceae_UCG-009	2	0	0	0	0	0	0	0	0.00297208	0	0	0	0	0	0	0
Bacteria;Proteobacteria;Alphaproteobacteria;Azospirillales;Azospirillaceae;Skermanella	0	1	0	1	0	0	0	0	0	0.00131122	0	0.00156818	0	0	0	0
Bacteria;Firmicutes;Bacilli;Bacillales;Bacillaceae;Alteribacillus	1	1	0	0	0	0	0	0	0.00148604	0.00131122	0	0	0	0	0	0
Bacteria;Atribacteria;Caldatribacteriia;Caldatribacteriales;Caldatribacteriaceae;Candidatus_Caldatribacterium	1	1	0	0	0	0	0	0	0.00148604	0.00131122	0	0	0	0	0	0
Bacteria;Proteobacteria;Alphaproteobacteria;Rhizobiales;Rhizobiaceae;Ochrobactrum	1	1	0	0	0	0	0	0	0.00148604	0.00131122	0	0	0	0	0	0
Bacteria;Synergistetes;Synergistia;Synergistales;Synergistaceae;Aminobacterium	0	2	0	0	0	0	0	0	0	0.00262243	0	0	0	0	0	0
Bacteria;Firmicutes;Bacilli;Bacillales;Paenibacillaceae;Aneurinibacillus	0	2	0	0	0	0	0	0	0	0.00262243	0	0	0	0	0	0
Bacteria;Chlamydiae;Chlamydiae;Chlamydiales;Parachlamydiaceae;Candidatus_Protochlamydia	0	2	0	0	0	0	0	0	0	0.00262243	0	0	0	0	0	0
Bacteria;Bacteroidetes;Bacteroidia;Flavobacteriales;Flavobacteriaceae;Flavobacterium	0	2	0	0	0	0	0	0	0	0.00262243	0	0	0	0	0	0
Bacteria;Firmicutes;Clostridia;Clostridiales;Lachnospiraceae;Fusicatenibacter	0	2	0	0	0	0	0	0	0	0.00262243	0	0	0	0	0	0
Archaea;Euryarchaeota;Methanobacteria;Methanobacteriales;Methanothermobacteraceae;Methanothermobacter	0	2	0	0	0	0	0	0	0	0.00262243	0	0	0	0	0	0
Bacteria;Planctomycetes;Planctomycetacia;Pirellulales;Pirellulaceae;p-1088-a5_gut_group	0	2	0	0	0	0	0	0	0	0.00262243	0	0	0	0	0	0
Bacteria;Firmicutes;Bacilli;Bacillales;Paenibacillaceae;Paenibacillus	0	2	0	0	0	0	0	0	0	0.00262243	0	0	0	0	0	0
Bacteria;Proteobacteria;Alphaproteobacteria;Rhizobiales;Rhizobiales_Incertae_Sedis;Phreatobacter	0	2	0	0	0	0	0	0	0	0.00262243	0	0	0	0	0	0
Bacteria;Proteobacteria;Gammaproteobacteria;Xanthomonadales;Xanthomonadaceae;Stenotrophomonas	0	2	0	0	0	0	0	0	0	0.00262243	0	0	0	0	0	0
Bacteria;Spirochaetes;Spirochaetia;Spirochaetales;Spirochaetaceae;Treponema_2	0	2	0	0	0	0	0	0	0	0.00262243	0	0	0	0	0	0
Bacteria;Proteobacteria;Gammaproteobacteria;Pseudomonadales;Moraxellaceae;Psychrobacter;Psychrobacter_frigidicola	179	163	568	20778	248	188	511	188	0.266001	0.213728	0.959233	32.5837	0.463067	0.357673	1.63186	0.329853
Bacteria;Firmicutes;Bacilli;Lactobacillales;Enterococcaceae;Catellicoccus;Catellicoccus_marimammalium_M35/04/3	3265	10884	719	711	721	161	2327	53	4.85192	14.2713	1.21424	1.11498	1.34625	0.306305	7.43118	0.0929906
Bacteria;Firmicutes;Bacilli;Lactobacillales;Lactobacillaceae;Lactobacillus;Lactobacillus_aviarius	61	265	68	201	7604	219	186	60	0.0906484	0.347473	0.114838	0.315205	14.1982	0.416651	0.593984	0.105272
Bacteria;Proteobacteria;Gammaproteobacteria;Pseudomonadales;Pseudomonadaceae;Pseudomonas;Pseudomonas_fragi	53	74	3312	2393	142	55	48	2433	0.07876	0.0970301	5.59327	3.75267	0.265143	0.104638	0.153286	4.2688
Bacteria;Proteobacteria;Gammaproteobacteria;Pseudomonadales;Moraxellaceae;Acinetobacter;Acinetobacter_lwoffii	73	3054	56	668	152	19	112	35	0.108481	4.00446	0.0945722	1.04755	0.283815	0.0361478	0.357667	0.0614089
Bacteria;Firmicutes;Bacilli;Lactobacillales;Carnobacteriaceae;Carnobacterium;Carnobacterium_mobile_DSM_4848	17	19	21	3211	12	4	21	9	0.0252627	0.0249131	0.0354646	5.03544	0.0224065	0.00761006	0.0670627	0.0157909
Bacteria;Firmicutes;Bacilli;Lactobacillales;Streptococcaceae;Lactococcus;Lactococcus_garvieae_subsp_garvieae	2	8	564	1	1	3	6	498	0.00297208	0.0104897	0.952477	0.00156818	0.0018672	0.00570755	0.0191608	0.873761
Bacteria;Firmicutes;Bacilli;Lactobacillales;Streptococcaceae;Streptococcus;Streptococcus_gallolyticus_subsp_macedonicus	25	17	6	3	527	10	10	13	0.037151	0.0222907	0.0101327	0.00470455	0.984017	0.0190252	0.0319346	0.022809
Bacteria;Firmicutes;Bacilli;Lactobacillales;Enterococcaceae;Enterococcus;Enterococcus_faecalis	23	109	9	10	2	1	2	2	0.0341789	0.142923	0.0151991	0.0156818	0.00373441	0.00190252	0.00638692	0.00350908
Bacteria;Firmicutes;Bacilli;Lactobacillales;Lactobacillaceae;Lactobacillus;Lactobacillus_sanfranciscensis	14	5	0	23	46	12	0	1	0.0208045	0.00655609	0	0.0360682	0.0858914	0.0228302	0	0.00175454
Bacteria;Firmicutes;Bacilli;Lactobacillales;Leuconostocaceae;Leuconostoc;Leuconostoc_citreum	3	17	0	6	38	15	1	2	0.00445812	0.0222907	0	0.00940911	0.0709538	0.0285377	0.00319346	0.00350908
Bacteria;Firmicutes;Bacilli;Lactobacillales;Aerococcaceae;Aerococcus;Aerococcus_urinaeequi	46	56	0	0	0	0	0	0	0.0683578	0.0734282	0	0	0	0	0	0
Bacteria;Firmicutes;Bacilli;Lactobacillales;Lactobacillaceae;Lactobacillus;Lactobacillus_ginsenosidimutans	1	1	0	0	1	2	0	75	0.00148604	0.00131122	0	0	0.0018672	0.00380503	0	0.13159
Bacteria;Firmicutes;Clostridia;Clostridiales;Clostridiaceae_1;Clostridium_sensu_stricto_1;Clostridium_perfringens_CPE_str_F4969	0	0	51	2	1	3	0	2	0	0	0.0861283	0.00313637	0.0018672	0.00570755	0	0.00350908
Bacteria;Bacteroidetes;Bacteroidia;Flavobacteriales;Weeksellaceae;Chryseobacterium;Chryseobacterium_hispanicum	0	57	0	0	0	0	0	1	0	0.0747394	0	0	0	0	0	0.00175454
Bacteria;Bacteroidetes;Bacteroidia;Sphingobacteriales;Sphingobacteriaceae;Sphingobacterium;Sphingobacterium_faecium	1	26	1	5	1	0	3	0	0.00148604	0.0340917	0.00168879	0.00784092	0.0018672	0	0.00958038	0
Bacteria;Firmicutes;Bacilli;Lactobacillales;Lactobacillaceae;Lactobacillus;Lactobacillus_murinus	10	3	0	4	1	3	0	2	0.0148604	0.00393365	0	0.00627274	0.0018672	0.00570755	0	0.00350908
Bacteria;Firmicutes;Bacilli;Lactobacillales;Streptococcaceae;Lactococcus;bacterium_NXKED9	0	12	0	0	1	2	0	1	0	0.0157346	0	0	0.0018672	0.00380503	0	0.00175454
Bacteria;Firmicutes;Bacilli;Lactobacillales;Streptococcaceae;Lactococcus;Lactococcus_lactis	3	4	0	0	5	2	0	0	0.00445812	0.00524487	0	0	0.00933602	0.00380503	0	0
Bacteria;Firmicutes;Bacilli;Lactobacillales;Streptococcaceae;Streptococcus;Streptococcus_suis	3	11	0	0	1	1	0	0	0.00445812	0.0144234	0	0	0.0018672	0.00190252	0	0
Bacteria;Bacteroidetes;Bacteroidia;Bacteroidales;Bacteroidaceae;Bacteroides;Bacteroides_coprophilus_DSM_18228_=_JCM_13818	2	0	0	1	0	0	5	0	0.00297208	0	0	0.00156818	0	0	0.0159673	0
Bacteria;Proteobacteria;Gammaproteobacteria;Betaproteobacteriales;Burkholderiaceae;Ralstonia;Ralstonia_insidiosa	5	0	0	0	3	0	1	0	0.00743019	0	0	0	0.00560161	0	0.00319346	0
Bacteria;Bacteroidetes;Bacteroidia;Bacteroidales;Bacteroidaceae;Bacteroides;Bacteroides_coprocola_DSM_17136	0	3	0	0	0	0	3	0	0	0.00393365	0	0	0	0	0.00958038	0
Bacteria;Actinobacteria;Actinobacteria;Bifidobacteriales;Bifidobacteriaceae;Bifidobacterium;Bifidobacterium_gallicum_DSM_20093_=_LMG_11596	4	2	1	0	0	0	1	0	0.00594415	0.00262243	0.00168879	0	0	0	0.00319346	0
Bacteria;Firmicutes;Bacilli;Lactobacillales;Streptococcaceae;Streptococcus;Streptococcus_equi_subsp_equi	4	4	0	0	0	0	0	0	0.00594415	0.00524487	0	0	0	0	0	0
Bacteria;Firmicutes;Bacilli;Lactobacillales;Lactobacillaceae;Lactobacillus;Lactobacillus_delbrueckii	4	0	1	0	0	0	0	2	0.00594415	0	0.00168879	0	0	0	0	0.00350908
Bacteria;Firmicutes;Bacilli;Bacillales;Family_XII;Exiguobacterium;Exiguobacterium_undae	0	0	1	6	0	0	0	0	0	0	0.00168879	0.00940911	0	0	0	0
Bacteria;Firmicutes;Bacilli;Lactobacillales;Lactobacillaceae;Lactobacillus;Lactobacillus_oligofermentans_DSM_15707_=_LMG_22743	0	0	0	0	0	0	0	6	0	0	0	0	0	0	0	0.0105272
Bacteria;Cyanobacteria;Oxyphotobacteria;Nostocales;Chroococcidiopsaceae;Aliterella_CENA595;Synechocystis_sp_PCC_7509	0	0	2	0	2	0	1	0	0	0	0.00337758	0	0.00373441	0	0.00319346	0
Bacteria;Proteobacteria;Gammaproteobacteria;Enterobacteriales;Enterobacteriaceae;Escherichia-Shigella;Streptomyces_sp_Q1	0	3	0	1	0	2	0	0	0	0.00393365	0	0.00156818	0	0.00380503	0	0
Bacteria;Proteobacteria;Gammaproteobacteria;Betaproteobacteriales;Burkholderiaceae;Comamonas;Comamonas_sp_KAR42	0	7	0	0	0	0	0	0	0	0.00917852	0	0	0	0	0	0
Bacteria;Bacteroidetes;Bacteroidia;Bacteroidales;Bacteroidaceae;Bacteroides;Bacteroides_ovatus_CL02T12C04	0	4	0	0	0	0	1	0	0	0.00524487	0	0	0	0	0.00319346	0
Bacteria;Actinobacteria;Thermoleophilia;Solirubrobacterales;Solirubrobacteraceae;Patulibacter;Patulibacter_americanus	0	0	0	5	0	0	0	0	0	0	0	0.00784092	0	0	0	0
Bacteria;Bacteroidetes;Bacteroidia;Bacteroidales;Tannerellaceae;Parabacteroides;Parabacteroides_distasonis	0	2	0	1	0	0	1	0	0	0.00262243	0	0.00156818	0	0	0.00319346	0
Bacteria;Tenericutes;Mollicutes;Mycoplasmatales;Mycoplasmataceae;Mycoplasma;Mycoplasma_moatsii_ATCC_27625	1	0	0	0	1	2	0	0	0.00148604	0	0	0	0.0018672	0.00380503	0	0
Bacteria;Deinococcus-Thermus;Deinococci;Deinococcales;Deinococcaceae;Deinococcus;Deinococcus_sp_VTT_E-052909	0	0	0	0	0	0	0	4	0	0	0	0	0	0	0	0.00701816
Bacteria;Bacteroidetes;Bacteroidia;Bacteroidales;Dysgonomonadaceae;Fermentimonas;Fermentimonas_caenicola	0	1	0	0	3	0	0	0	0	0.00131122	0	0	0.00560161	0	0	0
Bacteria;Firmicutes;Bacilli;Lactobacillales;Streptococcaceae;Streptococcus;Streptococcus_parauberis	0	5	0	0	0	0	0	0	0	0.00655609	0	0	0	0	0	0
Bacteria;Firmicutes;Clostridia;Clostridiales;Lachnospiraceae;Eubacterium_eligens_group;Eubacterium_eligens_ATCC_27750	0	0	0	0	0	0	2	0	0	0	0	0	0	0	0.00638692	0
Bacteria;Actinobacteria;Actinobacteria;Micrococcales;Microbacteriaceae;Microbacterium;Klebsiella_pneumoniae	0	0	0	4	0	0	0	0	0	0	0	0.00627274	0	0	0	0
Bacteria;Actinobacteria;Rubrobacteria;Rubrobacterales;Rubrobacteriaceae;Rubrobacter;Rubrobacter_sp_LYG58	0	1	1	2	0	0	0	0	0	0.00131122	0.00168879	0.00313637	0	0	0	0
Bacteria;Bacteroidetes;Bacteroidia;Bacteroidales;Bacteroidaceae;Bacteroides;Bacteroides_stercoris_ATCC_43183	0	1	0	3	0	0	0	0	0	0.00131122	0	0.00470455	0	0	0	0
Bacteria;Firmicutes;Clostridia;Clostridiales;Lachnospiraceae;Herbinix;Herbinix_hemicellulosilytica	3	1	0	0	0	0	0	0	0.00445812	0.00131122	0	0	0	0	0	0
Bacteria;Actinobacteria;Actinobacteria;Corynebacteriales;Corynebacteriaceae;Corynebacterium_1;Corynebacterium_xerosis	0	0	0	0	1	0	0	2	0	0	0	0	0.0018672	0	0	0.00350908
Bacteria;Actinobacteria;Actinobacteria;Corynebacteriales;Corynebacteriaceae;Corynebacterium_1;Corynebacterium_sp_KPL1989	0	0	0	0	0	0	0	3	0	0	0	0	0	0	0	0.00526362
Bacteria;Firmicutes;Bacilli;Bacillales;Bacillaceae;Bacillus;Bacillus_gibsonii	0	4	0	0	0	0	0	0	0	0.00524487	0	0	0	0	0	0
Bacteria;Proteobacteria;Alphaproteobacteria;Caulobacterales;Caulobacteraceae;Brevundimonas;Brevundimonas_bullata	0	4	0	0	0	0	0	0	0	0.00524487	0	0	0	0	0	0
Bacteria;Actinobacteria;Actinobacteria;Corynebacteriales;Nocardiaceae;Rhodococcus;Rhodococcus_rhodochrous	0	4	0	0	0	0	0	0	0	0.00524487	0	0	0	0	0	0
Bacteria;Firmicutes;Negativicutes;Selenomonadales;Acidaminococcaceae;Phascolarctobacterium;Phascolarctobacterium_faecium	0	0	0	0	0	1	1	0	0	0	0	0	0	0.00190252	0.00319346	0
Bacteria;Bacteroidetes;Bacteroidia;Flavobacteriales;Weeksellaceae;Chryseobacterium;Chryseobacterium_indologenes	0	0	0	0	1	0	1	0	0	0	0	0	0.0018672	0	0.00319346	0
Bacteria;Proteobacteria;Gammaproteobacteria;Enterobacteriales;Enterobacteriaceae;Escherichia-Shigella;Malaclemys_terrapin_terrapin	0	0	0	3	0	0	0	0	0	0	0	0.00470455	0	0	0	0
Bacteria;Firmicutes;Bacilli;Lactobacillales;Lactobacillaceae;Lactobacillus;Lactobacillus_reuteri	0	2	0	0	0	1	0	0	0	0.00262243	0	0	0	0.00190252	0	0
Bacteria;Actinobacteria;Actinobacteria;Actinomycetales;Actinomycetaceae;Actinomyces;Actinomyces_sp_VUL7	3	0	0	0	0	0	0	0	0.00445812	0	0	0	0	0	0	0
Bacteria;Firmicutes;Clostridia;Clostridiales;Lachnospiraceae;Blautia;Lachnospiraceae_bacterium_615	3	0	0	0	0	0	0	0	0.00445812	0	0	0	0	0	0	0
Bacteria;Firmicutes;Erysipelotrichia;Erysipelotrichales;Erysipelotrichaceae;Turicibacter;Turicibacter_sp_H121	3	0	0	0	0	0	0	0	0.00445812	0	0	0	0	0	0	0
Bacteria;Proteobacteria;Gammaproteobacteria;Oceanospirillales;Halomonadaceae;Halomonas;Halomonas_hamiltonii	0	3	0	0	0	0	0	0	0	0.00393365	0	0	0	0	0	0
Bacteria;Bacteroidetes;Bacteroidia;Bacteroidales;Prevotellaceae;Prevotella;Prevotella_pallens_ATCC_700821	0	3	0	0	0	0	0	0	0	0.00393365	0	0	0	0	0	0
Bacteria;Planctomycetes;Planctomycetacia;Pirellulales;Pirellulaceae;Pir4_lineage;Symbiodinium_sp_A1	0	3	0	0	0	0	0	0	0	0.00393365	0	0	0	0	0	0
Bacteria;Firmicutes;Clostridia;Clostridiales;Clostridiaceae_1;Clostridium_sensu_stricto_1;Clostridium_beijerinckii	0	0	0	0	2	0	0	0	0	0	0	0	0.00373441	0	0	0
Bacteria;Firmicutes;Clostridia;Clostridiales;Lachnospiraceae;Tyzzerella_3;Clostridium_colinum	0	0	1	0	1	0	0	0	0	0	0.00168879	0	0.0018672	0	0	0
Bacteria;Proteobacteria;Gammaproteobacteria;Alteromonadales;Pseudoalteromonadaceae;Pseudoalteromonas;Pseudoalteromonas_sp_enrichment_culture_clone_IC2-16	0	0	1	0	1	0	0	0	0	0	0.00168879	0	0.0018672	0	0	0
Bacteria;Proteobacteria;Deltaproteobacteria;Desulfovibrionales;Desulfovibrionaceae;Desulfovibrio;bacterium_enrichment_culture_clone_Ecwsrb037	0	0	0	0	0	0	0	2	0	0	0	0	0	0	0	0.00350908
Bacteria;Firmicutes;Bacilli;Lactobacillales;Lactobacillaceae;Lactobacillus;Lactobacillus_brevis	0	0	0	0	0	0	0	2	0	0	0	0	0	0	0	0.00350908
Bacteria;Actinobacteria;Actinobacteria;Corynebacteriales;Nocardiaceae;Nocardia;Nocardia_sp_0-16	0	0	0	0	0	0	0	2	0	0	0	0	0	0	0	0.00350908
Bacteria;Firmicutes;Bacilli;Lactobacillales;Leuconostocaceae;Weissella;Weissella_soli	0	0	0	1	0	1	0	0	0	0	0	0.00156818	0	0.00190252	0	0
Bacteria;Deinococcus-Thermus;Deinococci;Deinococcales;Deinococcaceae;Deinococcus;Deinococcus_aquatilis_DSM_23025	0	0	2	0	0	0	0	0	0	0	0.00337758	0	0	0	0	0
Bacteria;Proteobacteria;Alphaproteobacteria;Acetobacterales;Acetobacteraceae;Roseomonas;Roseomonas_sp_BZ31r	0	0	2	0	0	0	0	0	0	0	0.00337758	0	0	0	0	0
Bacteria;Bacteroidetes;Bacteroidia;Bacteroidales;Bacteroidaceae;Bacteroides;Bacteroides_sp_35BE34	0	0	0	2	0	0	0	0	0	0	0	0.00313637	0	0	0	0
Bacteria;Firmicutes;Clostridia;Clostridiales;Clostridiaceae_1;Clostridium_sensu_stricto_1;Clostridium_sp_CL-2	0	0	0	2	0	0	0	0	0	0	0	0.00313637	0	0	0	0
Bacteria;Deinococcus-Thermus;Deinococci;Deinococcales;Deinococcaceae;Deinococcus;Deinococcus_swuensis	0	0	0	2	0	0	0	0	0	0	0	0.00313637	0	0	0	0
Bacteria;Firmicutes;Clostridia;Clostridiales;Ruminococcaceae;Ruminococcaceae_UCG-009;Clostridium_leptum	2	0	0	0	0	0	0	0	0.00297208	0	0	0	0	0	0	0
Bacteria;Firmicutes;Bacilli;Lactobacillales;Lactobacillaceae;Lactobacillus;Lactobacillus_alimentarius	0	1	0	1	0	0	0	0	0	0.00131122	0	0.00156818	0	0	0	0
Bacteria;Bacteroidetes;Bacteroidia;Bacteroidales;Rikenellaceae;Alistipes;Alistipes_shahii_WAL_8301	0	2	0	0	0	0	0	0	0	0.00262243	0	0	0	0	0	0
Bacteria;Synergistetes;Synergistia;Synergistales;Synergistaceae;Aminobacterium;Aminobacterium_mobile_DSM_12262	0	2	0	0	0	0	0	0	0	0.00262243	0	0	0	0	0	0
Bacteria;Spirochaetes;Spirochaetia;Spirochaetales;Spirochaetaceae;Treponema_2;bacterium_enrichment_culture_clone_BBMC-5	0	2	0	0	0	0	0	0	0	0.00262243	0	0	0	0	0	0
Bacteria;Bacteroidetes;Bacteroidia;Bacteroidales;Bacteroidaceae;Bacteroides;Bacteroides_acidifaciens	0	2	0	0	0	0	0	0	0	0.00262243	0	0	0	0	0	0
Bacteria;Proteobacteria;Alphaproteobacteria;Caulobacterales;Caulobacteraceae;Brevundimonas;Brevundimonas_vesicularis	0	2	0	0	0	0	0	0	0	0.00262243	0	0	0	0	0	0
Bacteria;Deinococcus-Thermus;Deinococci;Deinococcales;Deinococcaceae;Deinococcus;Deinococcus_reticulitermitis	0	2	0	0	0	0	0	0	0	0.00262243	0	0	0	0	0	0
Bacteria;Firmicutes;Clostridia;Clostridiales;Syntrophomonadaceae;Syntrophomonas;Syntrophomonas_sp_DTU018	0	2	0	0	0	0	0	0	0	0.00262243	0	0	0	0	0	0
Bacteria;Firmicutes;Erysipelotrichia;Erysipelotrichales;Erysipelotrichaceae;Turicibacter;Turicibacter_sp_LA61	0	2	0	0	0	0	0	0	0	0.00262243	0	0	0	0	0	0
