# Supplementary material for: Comparative analysis of shotgun metagenomics and 16S rDNA sequencing of gut microbiota in migratory seagulls
Source: PeerJ journal article supplement (doi:10.7717/peerj.16394), 2023-11-03
Supplement: supplementary_material_figure1.pdf [file supplementary_material_figure1.pdf]

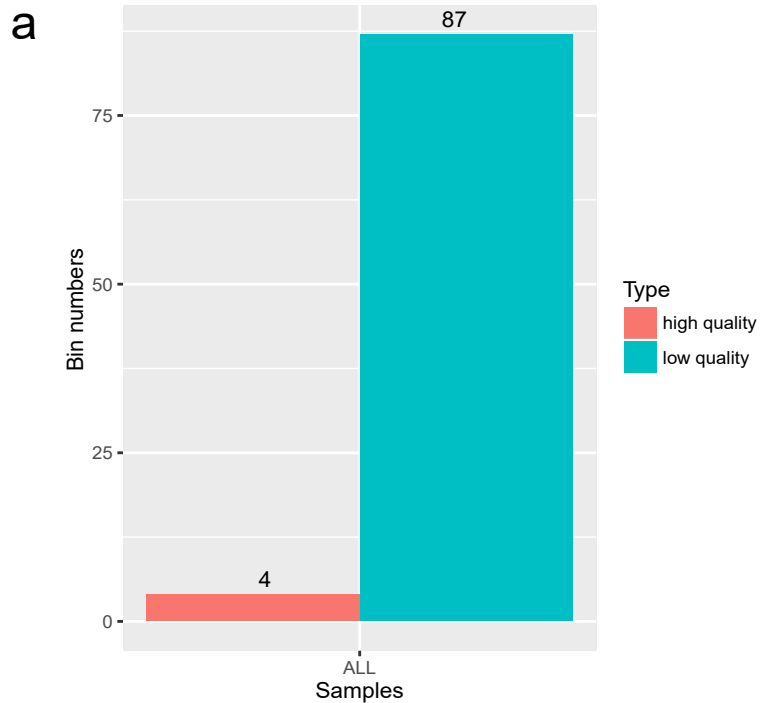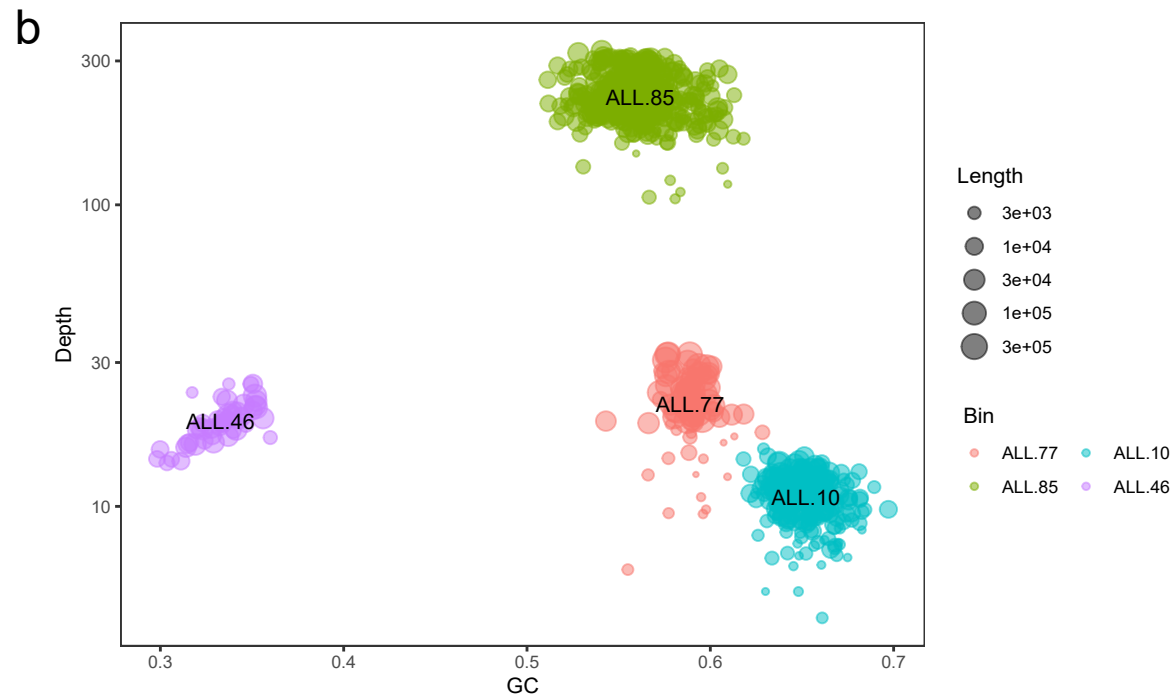

**c**

| Bin    | Contig num | Bin size(Mb) | Depth  | Completeness | Contamination | Taxonomy                                                                                      | Tax_abundance |
|--------|------------|--------------|--------|--------------|---------------|-----------------------------------------------------------------------------------------------|---------------|
| ALL.77 | 81         | 5.68         | 21.72  | 98.57        | 2.46          | Bacteria; Proteobacteria; Gammaproteobacteria; Pseudomonadales; Pseudomonadaceae; Pseudomonas | 0.99          |
| ALL.85 | 372        | 3.68         | 227.84 | 92.32        | 1.36          | Bacteria; Proteobacteria; Gammaproteobacteria; Enterobacteriales; Erwiniaceae; Pantoea        | 0.98          |
| ALL.10 | 253        | 2.54         | 10.71  | 85.8         | 1.75          | Bacteria; Actinobacteria; Actinobacteria; Micrococcales; Micrococcaceae; Kocuria              | 0.93          |
| ALL.46 | 48         | 0.92         | 19.1   | 81.68        | 1.31          | Bacteria; Firmicutes; Bacilli; Lactobacillales; Lactobacillaceae; Lactobacillus               | 0.9           |
